# Supplementary material for: Rational Selection of Syngeneic Preclinical Tumor Models for Immunotherapeutic Drug Discovery
Source: Oxford University Press journal article supplement (doi:10.1158/2326-6066.cir-16-0114), 2016-12-06
Supplement: 23266066cir160114-sup-166608_1_supp_3715516_cfk0yy.xlsx [file 23266066cir160114-sup-166608_1_supp_3715516_cfk0yy.xlsx]

## Sheet: Overview
Syn60_nonsynon_mutations
Non-synonymous mutations validated by targeted resequencing at > 200X depth
Exome-seq_nonsynon_mutations
Non-synonymous somatic mutations found with whole exome-sequencing of syngeneic cell lines in comparison with their matched background strain
arrayCGH_copy number
copy number estimates (Deletion = -2, Loss = -1, Diploid = 0, Gain = 1, Amplification >1) in syngeneic cell lines from array CGH
Exome-seq_copy_number
copy number classifications in syngeneic cell lines (and CT26 in vivo tumor) from analysis of whole exome-sequencing data
DEGs Tumour Comparison
Pathway activation Z scores per syngeneic tumor model derived from IPA enrichment analysis of in vivo tumor sample differentially-expressed genes
DEGs Spleen Comparison
Pathway activation Z scores per syngeneic tumor model derived from IPA enrichment analysis of spleen sample differentially-expressed genes
DEGs Lymph Node Comparison
Pathway activation Z scores per syngeneic tumor model derived from IPA enrichment analysis of lymph node sample differentially-expressed genes

## Sheet: Syn60_nonsynon_mutations
CHROM	POS	REF	ALT	Vf_N	RefRead_N	VarRead_N	Germ_pv_N	RefAvgQ_N	VarAvgQ_N	Samples	Func.refGene	Gene.refGene	ExonicFunc.refGene	AAChange.refGene	chr_pos	Species
chr11	98421027	G	A	99.61	0	258	1.33e-154	0	32	P815	exonic	Erbb2	nonsynonymous SNV	NM_001003817:c.G388A:p.A130T	chr11:98421027	DBA/J
chr2	157467539	A	T	37.91	1362	837	1.26e-290	33	33	MC38	exonic	Src	nonsynonymous SNV	NM_001025395:c.A965T:p.E322V	chr2:157467539	C57Bl6
chr18	61124237	A	C	100	0	230	9.03e-138	0	32	RENCA	exonic	Csf1r	nonsynonymous SNV	NM_001037859:c.A1659C:p.R553S	chr18:61124237	Balb/C
chr4	89276961	C	T	100	0	999	0	0	33	RENCA	exonic	Cdkn2a	nonsynonymous SNV	NM_001040654:c.G151A:p.V51I	chr4:89276961	Balb/C
chr19	29271398	G	A	19.95	587	149	3.32e-49	32	31	MC38	exonic	Jak2	nonsynonymous SNV	NM_001048177:c.G274A:p.E92K	chr19:29271398	C57Bl6
chr6	118169876	T	G	20.75	1219	320	7.43e-103	32	31	B16F10-ATCC	exonic	Ret	nonsynonymous SNV	NM_001080780:c.A2244C:p.K748N	chr6:118169876	C57Bl6
chr6	118169876	T	G	18.43	646	146	7.05e-48	32	32	B16F10 NCI	exonic	Ret	nonsynonymous SNV	NM_001080780:c.A2244C:p.K748N	chr6:118169876	C57Bl6
chr6	118175761	G	A	8.05	434	38	1.67e-12	32	33	B16F10 NCI	exonic	Ret	nonsynonymous SNV	NM_001080780:c.C1616T:p.P539L	chr6:118175761	C57Bl6
chr6	118174298	G	T	7.38	409	33	6.26e-11	31	32	EL4	exonic	Ret	stopgain SNV	NM_001080780:c.C1824A:p.Y608X	chr6:118174298	C57Bl6
chr6	118169136	G	A	67.65	542	1399	0	32	32	EL4	exonic	Ret	nonsynonymous SNV	NM_001080780:c.C2381T:p.A794V	chr6:118169136	C57Bl6
chr5	150541042	A	T	8.44	346	32	1.17e-10	31	33	P815	exonic	Brca2	nonsynonymous SNV	NM_001081001:c.A4270T:p.N1424Y	chr5:150541042	DBA/J
chr5	150541042	A	T	8.75	292	28	2.01e-09	31	34	TRAMP C1	exonic	Brca2	nonsynonymous SNV	NM_001081001:c.A4270T:p.N1424Y	chr5:150541042	C57Bl6
chr5	150541042	A	T	18.31	281	63	4.75e-21	32	33	EL4	exonic	Brca2	nonsynonymous SNV	NM_001081001:c.A4270T:p.N1424Y	chr5:150541042	C57Bl6
chr5	150542763	A	T	72.44	27	205	1.85e-102	31	32	B16F0 ECACC	exonic	Brca2	nonsynonymous SNV	NM_001081001:c.A5991T:p.K1997N	chr5:150542763	C57Bl6
chr5	150542763	A	T	79.51	42	260	8.33e-127	31	32	B16F0 ATCC	exonic	Brca2	nonsynonymous SNV	NM_001081001:c.A5991T:p.K1997N	chr5:150542763	C57Bl6
chr5	150544898	A	G	7.14	221	17	5.67e-06	31	32	LL2	exonic	Brca2	nonsynonymous SNV	NM_001081001:c.A6689G:p.Q2230R	chr5:150544898	C57Bl6
chr5	150544898	A	G	7.11	221	17	5.67e-06	31	32	CT26-cells	exonic	Brca2	nonsynonymous SNV	NM_001081001:c.A6689G:p.Q2230R	chr5:150544898	Balb/C
chr5	150567701	C	A	88.98	42	339	2.5e-170	30	31	ID8	exonic	Brca2	nonsynonymous SNV	NM_001081001:c.C9350A:p.T3117N	chr5:150567701	C57Bl6
chr5	150542969	G	A	17.8	836	181	4.92e-57	32	32	CT26-cells	exonic	Brca2	nonsynonymous SNV	NM_001081001:c.G6197A:p.R2066K	chr5:150542969	Balb/C
chr5	150567049	G	T	100	0	568	0	0	34	RENCA	exonic	Brca2	nonsynonymous SNV	NM_001081001:c.G9175T:p.G3059C	chr5:150567049	Balb/C
chr5	150567049	G	T	100	0	477	2.54e-286	0	33	CT26-cells	exonic	Brca2	nonsynonymous SNV	NM_001081001:c.G9175T:p.G3059C	chr5:150567049	Balb/C
chr5	150543051	T	A	7.08	417	32	1.31e-10	32	33	B16F10 NCI	exonic	Brca2	nonsynonymous SNV	NM_001081001:c.T6279A:p.S2093R	chr5:150543051	C57Bl6
chr5	75174972	A	C	8.35	384	35	1.39e-11	32	33	B16F10 NCI	exonic	Pdgfra	nonsynonymous SNV	NM_001083316:c.A1265C:p.D422A	chr5:75174972	C57Bl6
chr5	75163747	G	A	83.39	51	266	5.43e-127	32	32	CT26-cells	exonic	Pdgfra	nonsynonymous SNV	NM_001083316:c.G262A:p.V88I	chr5:75163747	Balb/C
chr5	75192563	G	A	100	0	285	7.75e-171	0	32	P815	exonic	Pdgfra	nonsynonymous SNV	NM_001083316:c.G3013A:p.G1005S	chr5:75192563	DBA/J
chr5	75192563	G	A	100	0	209	3.79e-125	0	32	RENCA	exonic	Pdgfra	nonsynonymous SNV	NM_001083316:c.G3013A:p.G1005S	chr5:75192563	Balb/C
chr5	75178014	T	A	7.09	236	18	2.79e-06	31	32	EL4	exonic	Pdgfra	nonsynonymous SNV	NM_001083316:c.T1738A:p.L580M	chr5:75178014	C57Bl6
chr1	65165221	C	A	100	0	1918	0	0	32	P815	exonic	Idh1	nonsynonymous SNV	NM_001111320:c.G729T:p.K243N	chr1:65165221	DBA/J
chr2	31796995	C	A	13.86	230	37	1.91e-12	33	31	B16F10 NCI	exonic	Abl1	nonsynonymous SNV	NM_001112703:c.C1503A:p.D501E	chr2:31796995	C57Bl6
chr2	31796996	C	G	10.8	314	38	1.27e-12	32	33	B16F10 NCI	exonic	Abl1	nonsynonymous SNV	NM_001112703:c.C1504G:p.R502G	chr2:31796996	C57Bl6
chr2	31800415	C	G	15.46	420	77	2.72e-25	32	33	B16F10 NCI	exonic	Abl1	nonsynonymous SNV	NM_001112703:c.C1945G:p.R649G	chr2:31800415	C57Bl6
chr2	31800415	C	G	14.4	321	54	7.1e-18	32	34	4T1	exonic	Abl1	nonsynonymous SNV	NM_001112703:c.C1945G:p.R649G	chr2:31800415	Balb/C
chr2	31792252	G	T	11.69	286	38	1.15e-12	31	33	B16F10 NCI	exonic	Abl1	nonsynonymous SNV	NM_001112703:c.G1157T:p.R386L	chr2:31792252	C57Bl6
chr5	75620952	A	G	8.93	204	20	6.12e-07	31	33	TC-1	exonic	Kit	nonsynonymous SNV	NM_001122733:c.A1040G:p.E347G	chr5:75620952	C57Bl6
chr5	75620952	A	G	7.81	472	40	4.12e-13	31	33	B16F10 NCI	exonic	Kit	nonsynonymous SNV	NM_001122733:c.A1040G:p.E347G	chr5:75620952	C57Bl6
chr5	75654438	A	G	9.72	223	24	3.31e-08	32	32	4T1	exonic	Kit	nonsynonymous SNV	NM_001122733:c.A2833G:p.N945D	chr5:75654438	Balb/C
chr5	75649631	G	T	61.81	1111	1803	0	31	31	P815	exonic	Kit	nonsynonymous SNV	NM_001122733:c.G2452T:p.D818Y	chr5:75649631	DBA/J
chr7	142653862	G	T	16.82	450	91	6.46e-30	32	32	MC38	exonic	Igf2	nonsynonymous SNV	NM_001122736:c.C497A:p.P166H	chr7:142653862	C57Bl6
chr4	118455682	T	C	25.78	564	199	4.22e-67	32	32	B16F0 ATCC	exonic	Mpl	nonsynonymous SNV	NM_001122949:c.A653G:p.Q218R	chr4:118455682	C57Bl6
chr4	118443434	G	A	99.73	0	370	5.9e-222	0	33	P815	exonic	Mpl	nonsynonymous SNV	NM_001122949:c.C1897T:p.P633S	chr4:118443434	DBA/J
chr4	118455226	C	T	99.7	0	665	0	0	32	RENCA	exonic	Mpl	nonsynonymous SNV	NM_001122949:c.G745A:p.G249S	chr4:118455226	Balb/C
chr4	118455226	C	T	100	0	413	8.05e-248	0	32	CT26-cells	exonic	Mpl	nonsynonymous SNV	NM_001122949:c.G745A:p.G249S	chr4:118455226	Balb/C
chr4	118455226	C	T	99.8	0	1011	0	0	32	4T1	exonic	Mpl	nonsynonymous SNV	NM_001122949:c.G745A:p.G249S	chr4:118455226	Balb/C
chr11	69588529	C	T	14.74	1012	175	1.95e-54	32	32	TC-1	exonic	Trp53	nonsynonymous SNV	NM_001127233:c.C532T:p.R178C	chr11:69588529	C57Bl6
chr11	69590672	G	C	17.77	805	175	4.08e-57	31	32	LL2	exonic	Trp53	nonsynonymous SNV	NM_001127233:c.G1001C:p.R334P	chr11:69590672	C57Bl6
chr11	69591267	G	A	47.36	796	717	5.75e-263	33	33	EL4	exonic	Trp53	nonsynonymous SNV	NM_001127233:c.G1105A:p.A369T	chr11:69591267	C57Bl6
chr11	69587267	G	T	36.28	965	550	2.03e-190	32	32	LL2	exonic	Trp53	stopgain SNV	NM_001127233:c.G94T:p.E32X	chr11:69587267	C57Bl6
chr6	47541967	C	T	42.12	459	334	8.68e-121	32	33	RENCA	exonic	Ezh2	nonsynonymous SNV	NM_001146689:c.G1523A:p.G508D	chr6:47541967	Balb/C
chr10	75906077	T	A	32.89	646	324	2.06e-112	32	32	MC38	exonic	Smarcb1	nonsynonymous SNV	NM_001161853:c.A721T:p.T241S	chr10:75906077	C57Bl6
chr3	84903756	A	G	100	0	656	0	0	31	P815	exonic	Fbxw7	nonsynonymous SNV	NM_001177774:c.A187G:p.N63D	chr3:84903756	DBA/J
chr3	84903756	A	G	99.89	0	892	0	0	31	EL4	exonic	Fbxw7	nonsynonymous SNV	NM_001177774:c.A187G:p.N63D	chr3:84903756	C57Bl6
chr3	84903756	A	G	99.68	1	629	0	35	31	RENCA	exonic	Fbxw7	nonsynonymous SNV	NM_001177774:c.A187G:p.N63D	chr3:84903756	Balb/C
chr3	84903756	A	G	100	0	272	5.08e-163	0	31	CT26-cells	exonic	Fbxw7	nonsynonymous SNV	NM_001177774:c.A187G:p.N63D	chr3:84903756	Balb/C
chr3	84903756	A	G	100	0	252	5.37e-151	0	31	4T1	exonic	Fbxw7	nonsynonymous SNV	NM_001177774:c.A187G:p.N63D	chr3:84903756	Balb/C
chr8	71687248	A	C	99.6	1	501	1.17e-298	34	33	P815	exonic	Jak3	nonsynonymous SNV	NM_001190830:c.A3094C:p.S1032R	chr8:71687248	DBA/J
chr8	71687248	A	C	100	0	457	2.74e-274	0	33	RENCA	exonic	Jak3	nonsynonymous SNV	NM_001190830:c.A3094C:p.S1032R	chr8:71687248	Balb/C
chr8	71687248	A	C	100	0	233	1.42e-139	0	33	CT26-cells	exonic	Jak3	nonsynonymous SNV	NM_001190830:c.A3094C:p.S1032R	chr8:71687248	Balb/C
chr8	71687248	A	C	99.67	1	304	2.23e-180	36	33	4T1	exonic	Jak3	nonsynonymous SNV	NM_001190830:c.A3094C:p.S1032R	chr8:71687248	Balb/C
chr8	71684276	G	T	100	0	1296	0	0	32	P815	exonic	Jak3	nonsynonymous SNV	NM_001190830:c.G2095T:p.G699C	chr8:71684276	DBA/J
chr8	71684276	G	T	100	0	1491	0	0	32	RENCA	exonic	Jak3	nonsynonymous SNV	NM_001190830:c.G2095T:p.G699C	chr8:71684276	Balb/C
chr8	71684276	G	T	99.86	1	706	0	30	32	CT26-cells	exonic	Jak3	nonsynonymous SNV	NM_001190830:c.G2095T:p.G699C	chr8:71684276	Balb/C
chr8	71684276	G	T	100	0	2234	0	0	32	4T1	exonic	Jak3	nonsynonymous SNV	NM_001190830:c.G2095T:p.G699C	chr8:71684276	Balb/C
chr11	4787511	T	G	10.64	671	80	8.96e-26	32	33	4T1	exonic	Nf2	nonsynonymous SNV	NM_001252250:c.A1379C:p.E460A	chr11:4787511	Balb/C
chr11	4787512	C	T	9.85	715	79	2.15e-25	32	32	4T1	exonic	Nf2	nonsynonymous SNV	NM_001252250:c.G1378A:p.E460K	chr11:4787512	Balb/C
chr17	72380150	T	A	100	0	1041	0	0	33	P815	exonic	Alk	nonsynonymous SNV	NM_007439:c.A694T:p.M232L	chr17:72380150	DBA/J
chr17	72380150	T	A	99.88	0	818	0	0	33	RENCA	exonic	Alk	nonsynonymous SNV	NM_007439:c.A694T:p.M232L	chr17:72380150	Balb/C
chr17	72380150	T	A	100	0	372	3.7e-223	0	33	CT26-cells	exonic	Alk	nonsynonymous SNV	NM_007439:c.A694T:p.M232L	chr17:72380150	Balb/C
chr17	72380150	T	A	99.72	0	721	0	0	33	4T1	exonic	Alk	nonsynonymous SNV	NM_007439:c.A694T:p.M232L	chr17:72380150	Balb/C
chr17	71900731	G	A	55.22	360	444	5.28e-172	32	32	P815	exonic	Alk	nonsynonymous SNV	NM_007439:c.C3008T:p.P1003L	chr17:71900731	DBA/J
chr17	71897974	G	T	39.84	669	443	9.3e-156	31	34	LL2	exonic	Alk	nonsynonymous SNV	NM_007439:c.C3202A:p.Q1068K	chr17:71897974	C57Bl6
chr17	71870056	G	T	41.93	239	174	3.03e-63	32	32	LL2	exonic	Alk	nonsynonymous SNV	NM_007439:c.C4252A:p.R1418S	chr17:71870056	C57Bl6
chr17	72205807	C	G	45.24	254	214	4.71e-79	31	31	B16F0 ECACC	exonic	Alk	nonsynonymous SNV	NM_007439:c.G1156C:p.G386R	chr17:72205807	C57Bl6
chr17	72205807	C	G	38.32	373	233	5.77e-83	31	31	B16F0 ATCC	exonic	Alk	nonsynonymous SNV	NM_007439:c.G1156C:p.G386R	chr17:72205807	C57Bl6
chr17	72205807	C	G	39.46	288	189	8.35e-68	32	31	B16F10-ATCC	exonic	Alk	nonsynonymous SNV	NM_007439:c.G1156C:p.G386R	chr17:72205807	C57Bl6
chr17	72205807	C	G	47.33	548	497	5.55e-182	31	32	B16F10 NCI	exonic	Alk	nonsynonymous SNV	NM_007439:c.G1156C:p.G386R	chr17:72205807	C57Bl6
chr17	71967567	C	T	99.89	1	912	0	31	32	RENCA	exonic	Alk	nonsynonymous SNV	NM_007439:c.G1748A:p.R583Q	chr17:71967567	Balb/C
chr17	71967567	C	T	100	0	413	8.05e-248	0	31	CT26-cells	exonic	Alk	nonsynonymous SNV	NM_007439:c.G1748A:p.R583Q	chr17:71967567	Balb/C
chr17	71967567	C	T	99.11	1	334	2.23e-198	30	32	4T1	exonic	Alk	nonsynonymous SNV	NM_007439:c.G1748A:p.R583Q	chr17:71967567	Balb/C
chr17	71902762	C	G	9.82	202	22	1.39e-07	32	32	TC-1	exonic	Alk	nonsynonymous SNV	NM_007439:c.G2686C:p.A896P	chr17:71902762	C57Bl6
chr17	71902762	C	G	15.47	716	131	1.57e-42	33	33	B16F10 NCI	exonic	Alk	nonsynonymous SNV	NM_007439:c.G2686C:p.A896P	chr17:71902762	C57Bl6
chr17	72360580	C	A	99.84	0	622	0	0	32	RENCA	exonic	Alk	nonsynonymous SNV	NM_007439:c.G942T:p.E314D	chr17:72360580	Balb/C
chr17	72360580	C	A	99.67	0	303	1.16e-181	0	32	CT26-cells	exonic	Alk	nonsynonymous SNV	NM_007439:c.G942T:p.E314D	chr17:72360580	Balb/C
chr17	72360580	C	A	100	0	1086	0	0	32	4T1	exonic	Alk	nonsynonymous SNV	NM_007439:c.G942T:p.E314D	chr17:72360580	Balb/C
chr17	72603216	A	G	100	0	508	5.69e-305	0	31	P815	exonic	Alk	nonsynonymous SNV	NM_007439:c.T494C:p.V165A	chr17:72603216	DBA/J
chr18	34313167	C	T	35.9	297	168	2.35e-59	32	31	B16F0 ECACC	exonic	Apc	stopgain SNV	NM_007462:c.C3115T:p.Q1039X	chr18:34313167	C57Bl6
chr18	34313167	C	T	36.36	329	188	2.05e-66	32	31	B16F0 ATCC	exonic	Apc	stopgain SNV	NM_007462:c.C3115T:p.Q1039X	chr18:34313167	C57Bl6
chr18	34315736	G	T	99.77	0	2628	0	0	32	P815	exonic	Apc	nonsynonymous SNV	NM_007462:c.G5684T:p.R1895L	chr18:34315736	DBA/J
chr18	34315736	G	T	100	0	1417	0	0	31	RENCA	exonic	Apc	nonsynonymous SNV	NM_007462:c.G5684T:p.R1895L	chr18:34315736	Balb/C
chr18	34315736	G	T	99.72	0	708	0	0	32	CT26-cells	exonic	Apc	nonsynonymous SNV	NM_007462:c.G5684T:p.R1895L	chr18:34315736	Balb/C
chr18	34315736	G	T	100	0	351	1.58e-210	0	32	4T1	exonic	Apc	nonsynonymous SNV	NM_007462:c.G5684T:p.R1895L	chr18:34315736	Balb/C
chr9	53531687	T	G	36.3	939	538	2.42e-186	32	32	B16F0 ECACC	exonic	Atm	nonsynonymous SNV	NM_007499:c.A275C:p.K92T	chr9:53531687	C57Bl6
chr9	53531687	T	G	42.33	925	682	1.04e-243	32	32	B16F0 ATCC	exonic	Atm	nonsynonymous SNV	NM_007499:c.A275C:p.K92T	chr9:53531687	C57Bl6
chr9	53531687	T	G	39.87	911	604	6.57e-213	32	32	B16F10-ATCC	exonic	Atm	nonsynonymous SNV	NM_007499:c.A275C:p.K92T	chr9:53531687	C57Bl6
chr9	53531687	T	G	52.49	792	875	0	32	32	B16F10 NCI	exonic	Atm	nonsynonymous SNV	NM_007499:c.A275C:p.K92T	chr9:53531687	C57Bl6
chr9	53487968	T	A	8.07	620	66	2.62e-21	32	33	ID8	exonic	Atm	stopgain SNV	NM_007499:c.A4732T:p.K1578X	chr9:53487968	C57Bl6
chr9	53480726	T	C	11.06	385	48	8.95e-16	33	33	B16F10 NCI	exonic	Atm	nonsynonymous SNV	NM_007499:c.A5362G:p.K1788E	chr9:53480726	C57Bl6
chr9	53480726	T	C	10.49	256	30	4.18e-10	33	33	4T1	exonic	Atm	nonsynonymous SNV	NM_007499:c.A5362G:p.K1788E	chr9:53480726	Balb/C
chr9	53524366	T	G	29.78	217	95	5.25e-33	31	33	ID8	exonic	Atm	nonsynonymous SNV	NM_007499:c.A643C:p.K215Q	chr9:53524366	C57Bl6
chr9	53524366	T	G	23.62	330	103	9.93e-35	32	32	EL4	exonic	Atm	nonsynonymous SNV	NM_007499:c.A643C:p.K215Q	chr9:53524366	C57Bl6
chr9	53486910	G	T	9.94	281	31	2.13e-10	33	33	B16F10 NCI	exonic	Atm	nonsynonymous SNV	NM_007499:c.C4831A:p.P1611T	chr9:53486910	C57Bl6
chr9	53524368	G	A	12.33	264	55	2.17e-18	31	34	P815	exonic	Atm	nonsynonymous SNV	NM_007499:c.C641T:p.S214F	chr9:53524368	DBA/J
chr9	53480734	C	T	35.63	445	248	3.69e-87	33	32	RENCA	exonic	Atm	nonsynonymous SNV	NM_007499:c.G5354A:p.R1785Q	chr9:53480734	Balb/C
chr11	16863018	A	G	43.24	546	416	3.94e-151	31	32	EL4	exonic	Egfr	nonsynonymous SNV	NM_007912:c.A497G:p.D166G	chr11:16863018	C57Bl6
chr6	88199563	G	A	47.38	251	226	3.62e-84	32	32	P815	exonic	Gata2	nonsynonymous SNV	NM_008090:c.G3A:p.M1I	chr6:88199563	DBA/J
chr18	73662802	C	A	100	0	724	0	0	32	PAN02	exonic	Smad4	stopgain SNV	NM_008540:c.G520T:p.E174X	chr18:73662802	C57Bl6
chr6	17527082	A	C	100	0	460	4.29e-276	0	33	P815	exonic	Met	nonsynonymous SNV	NM_008591:c.A1531C:p.K511Q	chr6:17527082	DBA/J
chr6	17531481	A	G	7.5	506	41	2.09e-13	32	32	B16F10 NCI	exonic	Met	nonsynonymous SNV	NM_008591:c.A1757G:p.D586G	chr6:17531481	C57Bl6
chr6	17540629	A	G	8.43	777	72	4.4e-23	32	32	LL2	exonic	Met	nonsynonymous SNV	NM_008591:c.A2553G:p.I851M	chr6:17540629	C57Bl6
chr6	17558844	A	T	13.17	694	106	2.97e-34	32	34	B16F10 NCI	exonic	Met	nonsynonymous SNV	NM_008591:c.A3470T:p.Y1157F	chr6:17558844	C57Bl6
chr6	17558844	A	T	13.22	256	39	4.74e-13	32	33	4T1	exonic	Met	nonsynonymous SNV	NM_008591:c.A3470T:p.Y1157F	chr6:17558844	Balb/C
chr6	17558846	A	G	12.94	666	99	5.31e-32	32	33	B16F10 NCI	exonic	Met	nonsynonymous SNV	NM_008591:c.A3472G:p.M1158V	chr6:17558846	C57Bl6
chr6	17558846	A	G	12.85	251	37	2.12e-12	32	32	4T1	exonic	Met	nonsynonymous SNV	NM_008591:c.A3472G:p.M1158V	chr6:17558846	Balb/C
chr6	17513425	C	T	35.04	621	335	4.32e-117	33	33	EL4	exonic	Met	nonsynonymous SNV	NM_008591:c.C1273T:p.R425C	chr6:17513425	C57Bl6
chr6	17526337	C	T	99.35	0	1526	0	0	31	P815	exonic	Met	nonsynonymous SNV	NM_008591:c.C1414T:p.L472F	chr6:17526337	DBA/J
chr6	17491679	C	A	12.71	206	30	3.48e-10	31	33	B16F10 NCI	exonic	Met	nonsynonymous SNV	NM_008591:c.C439A:p.P147T	chr6:17491679	C57Bl6
chr6	17533933	G	T	100	0	699	0	0	31	P815	exonic	Met	nonsynonymous SNV	NM_008591:c.G1882T:p.A628S	chr6:17533933	DBA/J
chr6	17492187	T	A	7.04	369	28	2.27e-09	31	32	B16F10 NCI	exonic	Met	nonsynonymous SNV	NM_008591:c.T947A:p.L316H	chr6:17492187	C57Bl6
chr2	26501915	T	C	34.55	215	114	3.22e-40	31	33	P815	exonic	Notch1	nonsynonymous SNV	NM_008714:c.A106G:p.R36G	chr2:26501915	DBA/J
chr2	26477115	T	G	16.01	360	69	8.65e-23	32	33	B16F0 ECACC	exonic	Notch1	nonsynonymous SNV	NM_008714:c.A2039C:p.D680A	chr2:26477115	C57Bl6
chr2	26477115	T	G	13.34	564	87	2.97e-28	32	32	B16F0 ATCC	exonic	Notch1	nonsynonymous SNV	NM_008714:c.A2039C:p.D680A	chr2:26477115	C57Bl6
chr2	26480980	G	T	16.03	287	55	2.62e-18	31	31	CT26-cells	exonic	Notch1	nonsynonymous SNV	NM_008714:c.C1093A:p.R365S	chr2:26480980	Balb/C
chr2	26460741	A	C	17.89	202	44	6.87e-15	32	32	EL4	exonic	Notch1	nonsynonymous SNV	NM_008714:c.T6386G:p.L2129R	chr2:26460741	C57Bl6
chr3	32436502	A	T	8.36	274	25	1.77e-08	32	33	P815	exonic	Pik3ca	nonsynonymous SNV	NM_008839:c.A297T:p.L99F	chr3:32436502	DBA/J
chr3	32436502	A	T	14.98	210	37	1.69e-12	33	34	TRAMP C1	exonic	Pik3ca	nonsynonymous SNV	NM_008839:c.A297T:p.L99F	chr3:32436502	C57Bl6
chr3	32436502	A	T	7.22	347	27	4.58e-09	32	33	EL4	exonic	Pik3ca	nonsynonymous SNV	NM_008839:c.A297T:p.L99F	chr3:32436502	C57Bl6
chr3	32436502	A	T	7.33	278	22	1.6e-07	32	34	PAN02	exonic	Pik3ca	nonsynonymous SNV	NM_008839:c.A297T:p.L99F	chr3:32436502	C57Bl6
chr3	32438048	A	T	13.89	1044	169	2.27e-52	32	32	LL2	exonic	Pik3ca	nonsynonymous SNV	NM_008839:c.A794T:p.Y265F	chr3:32438048	C57Bl6
chr9	64193790	C	A	28.5	264	116	3.64e-40	33	32	LL2	exonic	Map2k1	nonsynonymous SNV	NM_008927:c.G605T:p.G202V	chr9:64193790	C57Bl6
chr13	63523220	T	G	37.25	992	590	2.4e-205	33	34	EL4	exonic	Ptch1	nonsynonymous SNV	NM_008957:c.A2906C:p.D969A	chr13:63523220	C57Bl6
chr13	63533344	C	A	7.36	398	32	1.28e-10	32	33	4T1	exonic	Ptch1	stopgain SNV	NM_008957:c.G2128T:p.E710X	chr13:63533344	Balb/C
chr19	32799998	A	C	100	0	602	0	0	32	B16F0 ECACC	exonic	Pten	nonsynonymous SNV	NM_008960:c.A391C:p.T131P	chr19:32799998	C57Bl6
chr19	32799998	A	C	100	0	548	0	0	32	B16F0 ATCC	exonic	Pten	nonsynonymous SNV	NM_008960:c.A391C:p.T131P	chr19:32799998	C57Bl6
chr19	32799998	A	C	99.85	0	649	0	0	32	B16F10-ATCC	exonic	Pten	nonsynonymous SNV	NM_008960:c.A391C:p.T131P	chr19:32799998	C57Bl6
chr19	32799998	A	C	99.79	0	965	0	0	32	B16F10 NCI	exonic	Pten	nonsynonymous SNV	NM_008960:c.A391C:p.T131P	chr19:32799998	C57Bl6
chr19	32776051	C	T	13.61	419	66	1.26e-21	32	32	B16F10-ATCC	exonic	Pten	nonsynonymous SNV	NM_008960:c.C116T:p.A39V	chr19:32776051	C57Bl6
chr19	32799995	C	T	99.97	0	3276	0	0	33	EL4	exonic	Pten	nonsynonymous SNV	NM_008960:c.C388T:p.R130W	chr19:32799995	C57Bl6
chr5	114953366	G	A	96.91	0	627	0	0	32	P815	exonic	Hnf1a	nonsynonymous SNV	NM_009327:c.C1267T:p.P423S	chr5:114953366	DBA/J
chr5	114953366	G	A	98.59	0	560	0	0	32	RENCA	exonic	Hnf1a	nonsynonymous SNV	NM_009327:c.C1267T:p.P423S	chr5:114953366	Balb/C
chr5	114953366	G	A	96.87	0	371	1.48e-222	0	31	CT26-cells	exonic	Hnf1a	nonsynonymous SNV	NM_009327:c.C1267T:p.P423S	chr5:114953366	Balb/C
chr5	114953366	G	A	96.59	0	708	0	0	32	4T1	exonic	Hnf1a	nonsynonymous SNV	NM_009327:c.C1267T:p.P423S	chr5:114953366	Balb/C
chr5	114952641	A	G	8.13	226	20	6.38e-07	31	30	4T1	exonic	Hnf1a	nonsynonymous SNV	NM_009327:c.T1436C:p.V479A	chr5:114952641	Balb/C
chr11	101526112	T	C	7.85	268	23	7.58e-08	32	34	B16F10 NCI	exonic	Brca1	nonsynonymous SNV	NM_009764:c.A1195G:p.R399G	chr11:101526112	C57Bl6
chr11	101508104	T	G	8.24	311	28	2.08e-09	33	32	B16F10-ATCC	exonic	Brca1	nonsynonymous SNV	NM_009764:c.A4661C:p.Q1554P	chr11:101508104	C57Bl6
chr11	101507953	T	G	46.12	395	339	3.8e-125	33	32	RENCA	exonic	Brca1	nonsynonymous SNV	NM_009764:c.A4812C:p.E1604D	chr11:101507953	Balb/C
chr11	101524509	C	G	99.94	0	1710	0	0	32	P815	exonic	Brca1	nonsynonymous SNV	NM_009764:c.G2798C:p.C933S	chr11:101524509	DBA/J
chr11	101525608	A	T	8.39	293	27	4.2e-09	31	33	B16F10 NCI	exonic	Brca1	nonsynonymous SNV	NM_009764:c.T1699A:p.S567T	chr11:101525608	C57Bl6
chr11	101525604	A	T	7.67	264	22	1.57e-07	31	31	EL4	exonic	Brca1	stopgain SNV	NM_009764:c.T1703A:p.L568X	chr11:101525604	C57Bl6
chr11	101525014	A	G	99.82	1	1128	0	32	32	P815	exonic	Brca1	nonsynonymous SNV	NM_009764:c.T2293C:p.S765P	chr11:101525014	DBA/J
chr8	106656929	C	G	100	0	928	0	0	32	P815	exonic	Cdh1	nonsynonymous SNV	NM_009864:c.C799G:p.P267A	chr8:106656929	DBA/J
chr8	106656929	C	G	100	0	1895	0	0	33	EL4	exonic	Cdh1	nonsynonymous SNV	NM_009864:c.C799G:p.P267A	chr8:106656929	C57Bl6
chr8	106656929	C	G	100	0	647	0	0	32	RENCA	exonic	Cdh1	nonsynonymous SNV	NM_009864:c.C799G:p.P267A	chr8:106656929	Balb/C
chr8	106656929	C	G	100	0	307	4.57e-184	0	32	CT26-cells	exonic	Cdh1	nonsynonymous SNV	NM_009864:c.C799G:p.P267A	chr8:106656929	Balb/C
chr8	106656929	C	G	100	0	543	0	0	32	4T1	exonic	Cdh1	nonsynonymous SNV	NM_009864:c.C799G:p.P267A	chr8:106656929	Balb/C
chr8	106656930	C	A	100	0	1034	0	0	32	P815	exonic	Cdh1	nonsynonymous SNV	NM_009864:c.C800A:p.P267Q	chr8:106656930	DBA/J
chr8	106656930	C	A	99.91	0	2161	0	0	32	EL4	exonic	Cdh1	nonsynonymous SNV	NM_009864:c.C800A:p.P267Q	chr8:106656930	C57Bl6
chr8	106656930	C	A	100	0	822	0	0	31	RENCA	exonic	Cdh1	nonsynonymous SNV	NM_009864:c.C800A:p.P267Q	chr8:106656930	Balb/C
chr8	106656930	C	A	100	0	369	2.36e-221	0	31	CT26-cells	exonic	Cdh1	nonsynonymous SNV	NM_009864:c.C800A:p.P267Q	chr8:106656930	Balb/C
chr8	106656930	C	A	99.68	0	615	0	0	32	4T1	exonic	Cdh1	nonsynonymous SNV	NM_009864:c.C800A:p.P267Q	chr8:106656930	Balb/C
chr1	68071612	T	C	100	0	237	5.6e-142	0	32	P815	exonic	Erbb4	nonsynonymous SNV	NM_010154:c.A3041G:p.E1014G	chr1:68071612	DBA/J
chr1	68328259	G	T	14.18	725	120	7.94e-39	32	33	MC38	exonic	Erbb4	stopgain SNV	NM_010154:c.C1298A:p.S433X	chr1:68328259	C57Bl6
chr7	130241272	T	A	10.64	210	25	1.52e-08	32	32	TC-1	exonic	Fgfr2	nonsynonymous SNV	NM_010207:c.A439T:p.I147F	chr7:130241272	C57Bl6
chr7	130241272	T	A	8.65	411	39	7.69e-13	32	33	B16F10 NCI	exonic	Fgfr2	nonsynonymous SNV	NM_010207:c.A439T:p.I147F	chr7:130241272	C57Bl6
chr5	147348027	A	G	100	0	487	2.45e-292	0	32	RENCA	exonic	Flt3	nonsynonymous SNV	NM_010229:c.T2279C:p.L760S	chr5:147348027	Balb/C
chr5	147348027	A	G	100	0	256	2.12e-153	0	32	CT26-cells	exonic	Flt3	nonsynonymous SNV	NM_010229:c.T2279C:p.L760S	chr5:147348027	Balb/C
chr5	147341331	A	G	12.41	953	135	1.99e-41	33	32	EL4	exonic	Flt3	nonsynonymous SNV	NM_010229:c.T2432C:p.V811A	chr5:147341331	C57Bl6
chr5	75964709	T	G	51.69	300	322	1.66e-122	31	32	RENCA	exonic	Kdr	nonsynonymous SNV	NM_010612:c.A1127C:p.N376T	chr5:75964709	Balb/C
chr5	75966412	T	C	15.29	668	133	2.32e-43	32	32	P815	exonic	Kdr	nonsynonymous SNV	NM_010612:c.A917G:p.E306G	chr5:75966412	DBA/J
chr5	75966412	T	C	7.11	505	41	2.08e-13	32	32	TRAMP C1	exonic	Kdr	nonsynonymous SNV	NM_010612:c.A917G:p.E306G	chr5:75966412	C57Bl6
chr5	75966412	T	C	16.22	247	54	4.07e-18	32	32	B16F10-ATCC	exonic	Kdr	nonsynonymous SNV	NM_010612:c.A917G:p.E306G	chr5:75966412	C57Bl6
chr5	75966412	T	C	8.2	795	83	1.35e-26	33	32	EL4	exonic	Kdr	nonsynonymous SNV	NM_010612:c.A917G:p.E306G	chr5:75966412	C57Bl6
chr5	75966412	T	C	15.28	240	46	1.99e-15	32	32	PAN02	exonic	Kdr	nonsynonymous SNV	NM_010612:c.A917G:p.E306G	chr5:75966412	C57Bl6
chr5	75966469	G	A	36.15	3484	1984	0	32	32	P815	exonic	Kdr	nonsynonymous SNV	NM_010612:c.C860T:p.A287V	chr5:75966469	DBA/J
chr3	103060272	A	T	39.07	822	529	1.22e-185	32	33	LL2	exonic	Nras	nonsynonymous SNV	NM_010937:c.A183T:p.Q61H	chr3:103060272	C57Bl6
chr6	145246784	C	T	100	0	446	1.13e-267	0	32	CT26-cells	exonic	Kras	nonsynonymous SNV	NM_021284:c.G22A:p.V8M	chr6:145246784	Balb/C
chr6	145246772	C	A	70.29	197	466	9.98e-199	34	32	LL2	exonic	Kras	nonsynonymous SNV	NM_021284:c.G34T:p.G12C	chr6:145246772	C57Bl6
chr6	145246771	C	T	98.37	8	483	8.66e-278	32	33	CT26-cells	exonic	Kras	nonsynonymous SNV	NM_021284:c.G35A:p.G12D	chr6:145246771	Balb/C
chr6	145246769	C	A	46.45	710	621	1.15e-226	33	32	EL4	exonic	Kras	nonsynonymous SNV	NM_021284:c.G37T:p.G13C	chr6:145246769	C57Bl6
chr9	111231058	G	A	24.19	444	142	1.05e-47	33	32	LL2	exonic	Mlh1	nonsynonymous SNV	NM_026810:c.C1751T:p.A584V	chr9:111231058	C57Bl6
chr9	111229860	A	T	7.17	206	16	1.15e-05	31	33	B16F10 NCI	exonic	Mlh1	nonsynonymous SNV	NM_026810:c.T2095A:p.S699T	chr9:111229860	C57Bl6
chr3	84952427	T	C	7.55	253	21	3.2e-07	31	34	4T1	exonic	Fbxw7	nonsynonymous SNV	NM_080428:c.T55C:p.W19R	chr3:84952427	Balb/C
chr6	39643182	C	A	53.44	325	373	3.89e-143	33	32	MC38	exonic	Braf	nonsynonymous SNV	NM_139294:c.G1461T:p.W487C	chr6:39643182	C57Bl6
chr6	39662026	A	G	30.52	2360	1037	0	32	32	B16F0 ECACC	exonic	Braf	nonsynonymous SNV	NM_139294:c.T790C:p.C264R	chr6:39662026	C57Bl6
chr6	39662026	A	G	16.63	2529	505	3.81e-156	32	32	B16F0 ATCC	exonic	Braf	nonsynonymous SNV	NM_139294:c.T790C:p.C264R	chr6:39662026	C57Bl6
chr6	39662026	A	G	32.42	2596	1247	0	32	32	B16F10-ATCC	exonic	Braf	nonsynonymous SNV	NM_139294:c.T790C:p.C264R	chr6:39662026	C57Bl6
chr6	39662026	A	G	31.68	2043	948	7.45001587364016e-320	32	32	B16F10 NCI	exonic	Braf	nonsynonymous SNV	NM_139294:c.T790C:p.C264R	chr6:39662026	C57Bl6
chr7	80095625	T	G	7.87	315	27	4.37e-09	32	33	4T1	exonic	Idh2	nonsynonymous SNV	NM_173011:c.A1267C:p.S423R	chr7:80095625	Balb/C
chr6	29759971	A	G	100	0	292	4.79e-175	0	32	P815	exonic	Smo	nonsynonymous SNV	NM_176996:c.A2068G:p.R690G	chr6:29759971	DBA/J
chr6	29759971	A	G	99.59	1	240	5.34e-142	31	31	RENCA	exonic	Smo	nonsynonymous SNV	NM_176996:c.A2068G:p.R690G	chr6:29759971	Balb/C
chr6	29759971	A	G	100	0	228	1.44e-136	0	32	CT26-cells	exonic	Smo	nonsynonymous SNV	NM_176996:c.A2068G:p.R690G	chr6:29759971	Balb/C
chr7	130169794	T	A	7.41	452	37	3.59e-12	31	34	ID8	exonic	Fgfr2	stopgain SNV	NM_201601:c.A1855T:p.K619X	chr7:130169794	C57Bl6
chr7	130169794	T	A	11.49	244	34	1.99e-11	31	33	TRAMP C1	exonic	Fgfr2	stopgain SNV	NM_201601:c.A1855T:p.K619X	chr7:130169794	C57Bl6
chr7	130169794	T	A	7.29	560	46	5.85e-15	31	33	EL4	exonic	Fgfr2	stopgain SNV	NM_201601:c.A1855T:p.K619X	chr7:130169794	C57Bl6
chr7	130169794	T	A	13.67	244	41	9.65e-14	31	33	PAN02	exonic	Fgfr2	stopgain SNV	NM_201601:c.A1855T:p.K619X	chr7:130169794	C57Bl6
chr7	130172884	A	C	24.19	492	157	1.16e-52	31	33	B16F10 NCI	exonic	Fgfr2	nonsynonymous SNV	NM_201601:c.T1634G:p.M545R	chr7:130172884	C57Bl6
chr7	130172884	A	C	28.06	240	94	2.42e-32	31	33	4T1	exonic	Fgfr2	nonsynonymous SNV	NM_201601:c.T1634G:p.M545R	chr7:130172884	Balb/C
chr7	130172878	A	T	20.96	606	161	2.83e-53	32	33	B16F10 NCI	exonic	Fgfr2	nonsynonymous SNV	NM_201601:c.T1640A:p.I547K	chr7:130172878	C57Bl6
chr7	130172878	A	T	19.59	312	77	1.01e-25	32	33	4T1	exonic	Fgfr2	nonsynonymous SNV	NM_201601:c.T1640A:p.I547K	chr7:130172878	Balb/C
chr7	130169799	A	T	77.03	157	540	3.6e-243	31	32	B16F0 ECACC	exonic	Fgfr2	nonsynonymous SNV	NM_201601:c.T1850A:p.L617H	chr7:130169799	C57Bl6
chr7	130169799	A	T	51.1	287	302	1.26e-114	31	32	B16F0 ATCC	exonic	Fgfr2	nonsynonymous SNV	NM_201601:c.T1850A:p.L617H	chr7:130169799	C57Bl6
chr7	130169799	A	T	68.66	129	287	1.71e-121	31	32	B16F10-ATCC	exonic	Fgfr2	nonsynonymous SNV	NM_201601:c.T1850A:p.L617H	chr7:130169799	C57Bl6
chr7	130169799	A	T	59.78	184	275	9.05e-110	31	32	B16F10 NCI	exonic	Fgfr2	nonsynonymous SNV	NM_201601:c.T1850A:p.L617H	chr7:130169799	C57Bl6
chr7	130199863	A	G	7.24	267	21	3.27e-07	32	33	B16F10 NCI	exonic	Fgfr2	nonsynonymous SNV	NM_201601:c.T694C:p.F232L	chr7:130199863	C57Bl6

## Sheet: Exome-seq_nonsynon_mutations
Sample	Chr	Start	ID	Ref	Alt	Type	Effect	Functional_Class	Codon_Change	Amino_Acid_Change	cDNA_Change	Gene	Transcript	Exon	AlleleFreq
4T1	chr15	76950302	.	G	A	NON_SYNONYMOUS_CODING	MODERATE	MISSENSE	Gga/Aga	G195R	c.583G>A	1110038F14Rik	ENSMUST00000071792	5	0.3659
4T1	chr5	30480542	.	C	T	NON_SYNONYMOUS_CODING	MODERATE	MISSENSE	Ccc/Tcc	P78S	c.232C>T	1700001C02Rik	ENSMUST00000031078	2	0.1528
4T1	chr6	40964835	.	C	T	SPLICE_SITE_REGION+INTRON	LOW				c.40+7C>T	1810009J06Rik	ENSMUST00000076638	1	0.1863
4T1	chr15	101562491	.	G	T	NON_SYNONYMOUS_CODING	MODERATE	MISSENSE	gCt/gAt	A112D	c.335C>A	4732456N10Rik	ENSMUST00000023714	1	0.3913
4T1	chr14	95881920	.	G	GA	FRAME_SHIFT	HIGH		ctc/Actc	L41fs	c.120dupA	4921530L21Rik	ENSMUST00000045892	2	0.4270
4T1	chr1	26684344	.	C	G	NON_SYNONYMOUS_CODING	MODERATE	MISSENSE	gGa/gCa	G585A	c.1754G>C	4931408C20Rik	ENSMUST00000097801	2	0.8462
4T1	chr19	31893202	.	G	A	SPLICE_SITE_REGION+INTRON	LOW				c.99+4G>A	A1cf	ENSMUST00000075838	2	0.2791
4T1	chr17	45517789	.	G	C	NON_SYNONYMOUS_CODING	MODERATE	MISSENSE	Gca/Cca	A697P	c.2089G>C	Aars2	ENSMUST00000024733	15	0.4130
4T1	chr11	9522393	.	A	T	NON_SYNONYMOUS_CODING	MODERATE	MISSENSE	caA/caT	Q4266H	c.12798A>T	Abca13	ENSMUST00000042740	44	0.3147
4T1	chr14	118500057	.	A	T	NON_SYNONYMOUS_CODING	MODERATE	MISSENSE	aTa/aAa	I1215K	c.3644T>A	Abcc4	ENSMUST00000036554	29	0.4741
4T1	chr13	12310884	.	G	C	NON_SYNONYMOUS_CODING	MODERATE	MISSENSE	aaC/aaG	N68K	c.204C>G	Actn2	ENSMUST00000064204	2	0.3840
4T1	chr8	40681682	.	G	C	NON_SYNONYMOUS_CODING	MODERATE	MISSENSE	Gca/Cca	A730P	c.2188G>C	Adam24	ENSMUST00000051614	2	0.1585
4T1	chr14	68609911	.	G	T	NON_SYNONYMOUS_CODING	MODERATE	MISSENSE	Cta/Ata	L712I	c.2134C>A	Adam28	ENSMUST00000022642	20	0.2254
4T1	chr6	92795957	.	T	G	NON_SYNONYMOUS_CODING	MODERATE	MISSENSE	Atc/Ctc	I1826L	c.5476A>C	Adamts9	ENSMUST00000113438	36	0.4923
4T1	chr6	39576359	.	G	C	SPLICE_SITE_REGION+INTRON	LOW				c.907-4G>C	Adck2	ENSMUST00000140364	1	0.2105
4T1	chr5	112929699	.	C	T	NON_SYNONYMOUS_CODING	MODERATE	MISSENSE	Gag/Aag	E401K	c.1201G>A	Adrbk2	ENSMUST00000065167	14	0.1809
4T1	chr3	116779130	.	G	C	NON_SYNONYMOUS_CODING	MODERATE	MISSENSE	gCc/gGc	A824G	c.2471C>G	Agl	ENSMUST00000040603	19	0.2695
4T1	chr6	126866488	.	A	C	NON_SYNONYMOUS_CODING	MODERATE	MISSENSE	aAg/aCg	K690T	c.2069A>C	Akap3	ENSMUST00000095440	5	0.1875
4T1	chr7	45144990	.	G	T	NON_SYNONYMOUS_CODING	MODERATE	MISSENSE	tCt/tAt	S538Y	c.1613C>A	Aldh16a1	ENSMUST00000007977	13	0.1667
4T1	chr5	143891042	.	G	T	NON_SYNONYMOUS_CODING	MODERATE	MISSENSE	Cct/Act	P372T	c.1114C>A	Ankrd61	ENSMUST00000110717	3	0.1441
4T1	chr6	48907767	.	C	G	STOP_GAINED	HIGH	NONSENSE	taC/taG	Y581*	c.1743C>G	Aoc1	ENSMUST00000031835	3	0.1786
4T1	chrX	150585320	.	C	A	NON_SYNONYMOUS_CODING	MODERATE	MISSENSE	ttG/ttT	L156F	c.468G>T	Apex2	ENSMUST00000112721	4	0.2857
4T1	chr11	43222189	.	G	A	NON_SYNONYMOUS_CODING	MODERATE	MISSENSE	cGt/cAt	R854H	c.2561G>A	Atp10b	ENSMUST00000077659	13	0.3714
4T1	chr3	69575127	.	T	A	NON_SYNONYMOUS_CODING	MODERATE	MISSENSE	gAc/gTc	D267V	c.800A>T	B3galnt1	ENSMUST00000061826	3	0.3226
4T1	chr10	70958845	.	T	C	NON_SYNONYMOUS_CODING	MODERATE	MISSENSE	Atg/Gtg	M161V	c.481A>G	Bicc1	ENSMUST00000143791	5	0.4082
4T1	chr9	7861386	.	G	A	START_GAINED	LOW				c.-71C>T	Birc3	ENSMUST00000013949	2	0.1833
4T1	chr14	46385937	.	G	A	NON_SYNONYMOUS_CODING	MODERATE	MISSENSE	Cat/Tat	H51Y	c.151C>T	Bmp4	ENSMUST00000074077	3	0.5000
4T1	chr10	85965238	.	G	C	NON_SYNONYMOUS_CODING	MODERATE	MISSENSE	agC/agG	S415R	c.1245C>G	Bpifc	ENSMUST00000061699	13	0.3383
4T1	chr9	108114864	.	C	T	NON_SYNONYMOUS_CODING	MODERATE	MISSENSE	Ggc/Agc	G1230S	c.3688G>A	Bsn	ENSMUST00000035208	5	0.2000
4T1	chr10	85647801	.	C	G	SPLICE_SITE_REGION+INTRON	LOW				c.2937+8C>G	Btbd11	ENSMUST00000105307	14	0.2090
4T1	chr17	34508035	.	T	G	NON_SYNONYMOUS_CODING	MODERATE	MISSENSE	gAa/gCa	E507A	c.1520A>C	Btnl6	ENSMUST00000075483	9	1.0000
4T1	chr17	34508068	.	C	G	NON_SYNONYMOUS_CODING	MODERATE	MISSENSE	aGt/aCt	S496T	c.1487G>C	Btnl6	ENSMUST00000075483	9	1.0000
4T1	chr10	119213624	.	G	A	NON_SYNONYMOUS_CODING	MODERATE	MISSENSE	Cgt/Tgt	R406C	c.1216C>T	Cand1	ENSMUST00000020315	8	0.1778
4T1	chr10	119213632	.	T	G	NON_SYNONYMOUS_CODING	MODERATE	MISSENSE	aAa/aCa	K403T	c.1208A>C	Cand1	ENSMUST00000020315	8	0.1678
4T1	chr15	79833699	.	C	A	SPLICE_SITE_REGION+INTRON	LOW				c.179+3G>T	Cbx6	ENSMUST00000109627	3	0.1515
4T1	chr9	73013079	.	C	G	NON_SYNONYMOUS_CODING	MODERATE	MISSENSE	Cac/Gac	H659D	c.1975C>G	Ccpg1	ENSMUST00000085350	8	0.5000
4T1	chr1	60765390	.	TG	T	SPLICE_SITE_DONOR+INTRON	HIGH				c.528+1delG	Cd28	ENSMUST00000027165	3	0.7931
4T1	chr4	11814927	.	GGGCA	G	FRAME_SHIFT	HIGH		ggcatg/	G785fs	c.2353_2356delGGCA	Cdh17	ENSMUST00000029871	17	1.0000
4T1	chr2	32712559	.	T	C	SPLICE_SITE_REGION+INTRON	LOW				c.92+6A>G	Cdk9	ENSMUST00000009699	1	0.4699
4T1	chr1	189657653	.	G	C	NON_SYNONYMOUS_CODING	MODERATE	MISSENSE	gaC/gaG	D1327E	c.3981C>G	Cenpf	ENSMUST00000171929	12	0.2367
4T1	chr4	153996339	.	G	A	SPLICE_SITE_DONOR+INTRON	HIGH				c.2258+1G>A	Cep104	ENSMUST00000047497	17	0.3889
4T1	chr18	53740056	.	G	T	NON_SYNONYMOUS_CODING	MODERATE	MISSENSE	Cac/Aac	H68N	c.202C>A	Cep120	ENSMUST00000049811	3	0.2083
4T1	chr7	139638918	.	T	TCTC	CODON_INSERTION	MODERATE		aag/aagGAG	K1376dup	c.4128_4129insGAG	Cfap46	ENSMUST00000129990	30	0.3077
4T1	chr7	139640512	.	G	C	SPLICE_SITE_REGION+INTRON	LOW				c.3631-5C>G	Cfap46	ENSMUST00000129990	27	0.5000
4T1	chr18	74299289	.	G	A	NON_SYNONYMOUS_CODING	MODERATE	MISSENSE	Gtc/Atc	V83I	c.247G>A	Cfap53	ENSMUST00000114895	2	0.1622
4T1	chr7	73453166	.	T	C	NON_SYNONYMOUS_CODING	MODERATE	MISSENSE	gAc/gGc	D1357G	c.4070A>G	Chd2	ENSMUST00000169922	32	0.4030
4T1	chr9	55034889	.	G	T	NON_SYNONYMOUS_CODING	MODERATE	MISSENSE	aCc/aAc	T367N	c.1100C>A	Chrnb4	ENSMUST00000034854	5	0.3171
4T1	chr6	129376352	.	A	G	SPLICE_SITE_REGION+INTRON	LOW				c.678-7T>C	Clec12b	ENSMUST00000032261	5	0.2203
4T1	chr6	85817678	.	G	A	NON_SYNONYMOUS_CODING	MODERATE	MISSENSE	tCt/tTt	S100F	c.299C>T	Cml5	ENSMUST00000032074	3	0.4600
4T1	chr19	5098250	.	A	C	NON_SYNONYMOUS_CODING	MODERATE	MISSENSE	tTc/tGc	F5C	c.14T>G	Cnih2	ENSMUST00000025805	1	0.2973
4T1	chr6	106353690	.	A	G	NON_SYNONYMOUS_CODING	MODERATE	MISSENSE	Aat/Gat	N90D	c.268A>G	Cntn4	ENSMUST00000089208	6	0.2935
4T1	chr2	130391295	.	G	T	NON_SYNONYMOUS_CODING	MODERATE	MISSENSE	Ctc/Atc	L625I	c.1873C>A	Cpxm1	ENSMUST00000028897	13	0.5649
4T1	chr14	56100739	.	C	G	NON_SYNONYMOUS_CODING	MODERATE	MISSENSE	aGc/aCc	S133T	c.398G>C	Ctsg	ENSMUST00000015583	4	0.3600
4T1	chr19	37699977	.	C	A	NON_SYNONYMOUS_CODING	MODERATE	MISSENSE	Cta/Ata	L316I	c.946C>A	Cyp26a1	ENSMUST00000025946	5	0.2912
4T1	chr19	39513299	.	A	G	NON_SYNONYMOUS_CODING	MODERATE	MISSENSE	Agc/Ggc	S99G	c.295A>G	Cyp2c39	ENSMUST00000025968	2	0.5066
4T1	chr19	40090970	.	C	G	NON_SYNONYMOUS_CODING	MODERATE	MISSENSE	atC/atG	I169M	c.507C>G	Cyp2c50	ENSMUST00000080171	4	0.1473
4T1	chr14	45629592	.	C	G	NON_SYNONYMOUS_CODING	MODERATE	MISSENSE	Gat/Cat	D318H	c.952G>C	Ddhd1	ENSMUST00000087320	2	0.5223
4T1	chr8	19295101	.	A	T	NON_SYNONYMOUS_CODING	MODERATE	MISSENSE	aaA/aaT	K24N	c.72A>T	Defb3	ENSMUST00000033852	2	0.2180
4T1	chr2	38287116	.	A	T	NON_SYNONYMOUS_CODING	MODERATE	MISSENSE	aTc/aAc	I5N	c.14T>A	Dennd1a	ENSMUST00000102787	1	0.3333
4T1	chr11	100695233	.	C	A	NON_SYNONYMOUS_CODING	MODERATE	MISSENSE	cGg/cTg	R654L	c.1961G>T	Dhx58	ENSMUST00000017974	13	1.0000
4T1	chr5	123512599	.	G	C	NON_SYNONYMOUS_CODING	MODERATE	MISSENSE	gCa/gGa	A209G	c.626C>G	Diablo	ENSMUST00000111587	6	0.2069
4T1	chr1	46362971	.	T	G	NON_SYNONYMOUS_CODING	MODERATE	MISSENSE	Tca/Gca	S3989A	c.11965T>G	Dnah7b	ENSMUST00000069293	65	0.1660
4T1	chr18	35681912	.	C	A	SPLICE_SITE_REGION+INTRON	LOW				c.776+8G>T	Dnajc18	ENSMUST00000025208	6	0.7025
4T1	chr17	56191057	.	C	T	NON_SYNONYMOUS_CODING	MODERATE	MISSENSE	gGg/gAg	G633E	c.1898G>A	Dpp9	ENSMUST00000038794	16	0.5000
4T1	chr17	56211643	.	C	T	NON_SYNONYMOUS_CODING	MODERATE	MISSENSE	Gac/Aac	D54N	c.160G>A	Dpp9	ENSMUST00000038794	3	0.2031
4T1	chr5	136026554	.	C	T	NON_SYNONYMOUS_CODING	MODERATE	MISSENSE	cCg/cTg	P365L	c.1094C>T	Dtx2	ENSMUST00000111142	6	1.0000
4T1	chr17	26508254	.	A	G	NON_SYNONYMOUS_CODING	MODERATE	MISSENSE	Tgc/Cgc	C24R	c.70T>C	Dusp1	ENSMUST00000025025	1	0.3571
4T1	chr12	110649884	.	A	G	NON_SYNONYMOUS_CODING	MODERATE	MISSENSE	tAc/tGc	Y3123C	c.9368A>G	Dync1h1	ENSMUST00000018851	48	0.4082
4T1	chr18	34863419	.	G	T	NON_SYNONYMOUS_CODING	MODERATE	MISSENSE	aGa/aTa	R418I	c.1253G>T	Egr1	ENSMUST00000064795	2	0.3043
4T1	chr4	139363248	.	T	C	NON_SYNONYMOUS_CODING	MODERATE	MISSENSE	tTc/tCc	F433S	c.1298T>C	Emc1	ENSMUST00000082262	12	0.2300
4T1	chr4	41638815	.	G	T	NON_SYNONYMOUS_CODING	MODERATE	MISSENSE	Ctc/Atc	L10I	c.28C>A	Enho	ENSMUST00000127306	2	0.3864
4T1	chr11	30948436	.	G	A	STOP_GAINED	HIGH	NONSENSE	Cga/Tga	R205*	c.613C>T	Erlec1	ENSMUST00000073192	7	0.3786
4T1	chr8	13034939	.	G	C	NON_SYNONYMOUS_CODING	MODERATE	MISSENSE	Gtc/Ctc	V322L	c.964G>C	F7	ENSMUST00000033820	8	0.1750
4T1	chr12	65105202	.	G	T	STOP_GAINED	HIGH	NONSENSE	Gag/Tag	E811*	c.2431G>T	Fancm	ENSMUST00000058889	14	0.2747
4T1	chr18	62514850	.	C	G	NON_SYNONYMOUS_CODING	MODERATE	MISSENSE	agG/agC	R872S	c.2616G>C	Fbxo38	ENSMUST00000048688	15	0.1905
4T1	chrX	151067329	.	G	A	NON_SYNONYMOUS_CODING	MODERATE	MISSENSE	Gac/Aac	D326N	c.976G>A	Fgd1	ENSMUST00000026296	4	0.4000
4T1	chr14	7889150	.	T	A	NON_SYNONYMOUS_CODING	MODERATE	MISSENSE	cTg/cAg	L500Q	c.1499T>A	Flnb	ENSMUST00000052678	10	0.6216
4T1	chr1	162888810	.	G	C	NON_SYNONYMOUS_CODING	MODERATE	MISSENSE	ttC/ttG	F69L	c.207C>G	Fmo2	ENSMUST00000045902	3	0.2828
4T1	chr3	155087579	.	G	T	NON_SYNONYMOUS_CODING	MODERATE	MISSENSE	caC/caA	H270Q	c.810C>A	Fpgt	ENSMUST00000066568	4	0.0977
4T1	chr12	64472554	.	C	T	NON_SYNONYMOUS_CODING	MODERATE	MISSENSE	Gct/Act	A713T	c.2137G>A	Fscb	ENSMUST00000059833	1	0.2376
4T1	chr2	172454096	.	G	T	NON_SYNONYMOUS_CODING	MODERATE	MISSENSE	ttC/ttA	F269L	c.807C>A	Gcnt7	ENSMUST00000099060	2	0.4132
4T1	chr2	155504715	.	A	T	NON_SYNONYMOUS_CODING	MODERATE	MISSENSE	Tgg/Agg	W222R	c.664T>A	Ggt7	ENSMUST00000029131	4	0.4872
4T1	chr1	118837480	.	A	C	NON_SYNONYMOUS_CODING	MODERATE	MISSENSE	aaT/aaG	N980K	c.2940T>G	Gli2	ENSMUST00000062483	14	0.4940
4T1	chr19	28666108	.	G	C	NON_SYNONYMOUS_CODING	MODERATE	MISSENSE	caC/caG	H11Q	c.33C>G	Glis3	ENSMUST00000162022	2	0.3173
4T1	chr15	103563434	.	G	A	NON_SYNONYMOUS_CODING	MODERATE	MISSENSE	aCc/aTc	T45I	c.134C>T	Glycam1	ENSMUST00000023134	3	0.3529
4T1	chr13	98283515	.	C	A	NON_SYNONYMOUS_CODING	MODERATE	MISSENSE	Cac/Aac	H23N	c.67C>A	Gm21976	ENSMUST00000180066	2	0.1094
4T1	chr10	82954830	.	A	G	NON_SYNONYMOUS_CODING	MODERATE	MISSENSE	Atc/Gtc	I163V	c.487A>G	Gm4799	ENSMUST00000095396	1	0.8095
4T1	chr5	10867200	.	C	A	NON_SYNONYMOUS_CODING	MODERATE	MISSENSE	gCt/gAt	A36D	c.107C>A	Gm6455	ENSMUST00000095015	2	0.1852
4T1	chr13	50701874	.	G	T	NON_SYNONYMOUS_CODING	MODERATE	MISSENSE	aGa/aTa	R516I	c.1547G>T	Gm8765	ENSMUST00000099518	4	0.4683
4T1	chr8	69814182	.	C	A	SPLICE_SITE_REGION+INTRON	LOW				c.939+7C>A	Gmip	ENSMUST00000036074	10	0.5294
4T1	chr17	43311228	.	C	G	NON_SYNONYMOUS_CODING	MODERATE	MISSENSE	atC/atG	I785M	c.2355C>G	Gpr110	ENSMUST00000047399	12	0.3364
4T1	chr17	43453098	.	G	A	NON_SYNONYMOUS_CODING	MODERATE	MISSENSE	Gtg/Atg	V1304M	c.3910G>A	Gpr116	ENSMUST00000113599	20	0.1535
4T1	chr6	135078913	.	C	A	NON_SYNONYMOUS_CODING	MODERATE	MISSENSE	ttC/ttA	F119L	c.357C>A	Gprc5a	ENSMUST00000050104	2	0.4444
4T1	chrX	142189823	.	G	T	NON_SYNONYMOUS_CODING	MODERATE	MISSENSE	Cgc/Agc	R10S	c.28C>A	Gucy2f	ENSMUST00000042530	2	0.1364
4T1	chrX	85711101	.	T	C	NON_SYNONYMOUS_CODING	MODERATE	MISSENSE	aAa/aGa	K511R	c.1532A>G	Gyk	ENSMUST00000113978	19	0.5973
4T1	chr14	56233986	.	G	A	NON_SYNONYMOUS_CODING	MODERATE	MISSENSE	Ccc/Tcc	P33S	c.97C>T	Gzmc	ENSMUST00000015585	2	0.4382
4T1	chr13	56084214	.	G	T	NON_SYNONYMOUS_CODING	MODERATE	MISSENSE	Ccc/Acc	P254T	c.760C>A	H2afy	ENSMUST00000016081	7	0.4713
4T1	chr17	36083295	.	G	C	NON_SYNONYMOUS_CODING	MODERATE	MISSENSE	gCc/gGc	A183G	c.548C>G	H2-Bl	ENSMUST00000184502	3	0.6000
4T1	chr17	35424901	.	C	G	NON_SYNONYMOUS_CODING	MODERATE	MISSENSE	Ctg/Gtg	L9V	c.25C>G	H2-Q6	ENSMUST00000113879	1	0.4747
4T1	chr17	35428353	.	A	C	NON_SYNONYMOUS_CODING	MODERATE	MISSENSE	Att/Ctt	I325L	c.973A>C	H2-Q6	ENSMUST00000113879	5	0.9896
4T1	chr17	35440189	.	T	A	SPLICE_SITE_REGION+INTRON	LOW				c.610+5T>A	H2-Q7	ENSMUST00000071951	3	1.0000
4T1	chr17	35442402	.	T	C	NON_SYNONYMOUS_CODING	MODERATE	MISSENSE	aTg/aCg	M249T	c.746T>C	H2-Q7	ENSMUST00000071951	4	0.4703
4T1	chr7	27529455	.	G	T	NON_SYNONYMOUS_CODING	MODERATE	MISSENSE	tgG/tgT	W443C	c.1329G>T	Hipk4	ENSMUST00000108353	3	0.2500
4T1	chr13	23585713	.	C	G	NON_SYNONYMOUS_CODING	MODERATE	MISSENSE	Gcg/Ccg	A82P	c.244G>C	Hist1h2be	ENSMUST00000051091	2	0.1864
4T1	chr4	123189044	.	C	T	NON_SYNONYMOUS_CODING	MODERATE	MISSENSE	gCg/gTg	A61V	c.182C>T	Hpcal4	ENSMUST00000059667	4	0.1625
4T1	chrX	52988220	.	CGTCATGCCGACCCGCA	C	FRAME_SHIFT+START_LOST	HIGH		atgccgacccgcagtccc/	M1fs	c.1_16delATGCCGACCCGCAGTC	Hprt	ENSMUST00000026723	1	1.0000
4T1	chr4	137564024	.	G	T	NON_SYNONYMOUS_CODING	MODERATE	MISSENSE	cGg/cTg	R3895L	c.11684G>T	Hspg2	ENSMUST00000171332	86	0.2308
4T1	chrX	57054192	.	C	A	NON_SYNONYMOUS_CODING	MODERATE	MISSENSE	ttC/ttA	F61L	c.183C>A	Htatsf1	ENSMUST00000088652	2	0.2143
4T1	chrX	151901601	.	G	T	NON_SYNONYMOUS_CODING	MODERATE	MISSENSE	atG/atT	M2210I	c.6630G>T	Huwe1	ENSMUST00000026292	48	0.1500
4T1	chr7	28522921	.	C	A	NON_SYNONYMOUS_CODING	MODERATE	MISSENSE	cCa/cAa	P29Q	c.86C>A	Ifnl3	ENSMUST00000078364	1	0.3667
4T1	chr16	22161288	.	C	T	NON_SYNONYMOUS_CODING	MODERATE	MISSENSE	gGg/gAg	G66E	c.197G>A	Igf2bp2	ENSMUST00000100052	2	0.1206
4T1	chrX	49783134	.	C	T	NON_SYNONYMOUS_CODING	MODERATE	MISSENSE	Gta/Ata	V1262I	c.3784G>A	Igsf1	ENSMUST00000033442	19	1.0000
4T1	chr1	172496955	.	C	G	NON_SYNONYMOUS_CODING	MODERATE	MISSENSE	agC/agG	S813R	c.2439C>G	Igsf9	ENSMUST00000052629	19	0.3824
4T1	chr1	69577913	.	C	T	NON_SYNONYMOUS_CODING	MODERATE	MISSENSE	Gac/Aac	D98N	c.292G>A	Ikzf2	ENSMUST00000190771	4	1.0000
4T1	chr1	91387260	.	A	C	NON_SYNONYMOUS_CODING	MODERATE	MISSENSE	aTc/aGc	I127S	c.380T>G	Ilkap	ENSMUST00000027534	5	0.6282
4T1	chr1	93816369	.	C	T	SPLICE_SITE_REGION+INTRON	LOW				c.483-6C>T	Ing5	ENSMUST00000027505	5	0.2658
4T1	chr9	54882456	.	GGTAC	G	SPLICE_SITE_DONOR+SPLICE_SITE_REGION+INTRON	HIGH				c.413+1_413+4delGTAC	Ireb2	ENSMUST00000034843	4	0.4186
4T1	chr18	58671634	.	G	T	NON_SYNONYMOUS_CODING	MODERATE	MISSENSE	Gtg/Ttg	V205L	c.613G>T	Isoc1	ENSMUST00000025503	3	0.1596
4T1	chr19	25411230	.	C	T	NON_SYNONYMOUS_CODING	MODERATE	MISSENSE	Cgc/Tgc	R728C	c.2182C>T	Kank1	ENSMUST00000049400	5	0.2066
4T1	chr8	15027411	.	C	A	NON_SYNONYMOUS_CODING	MODERATE	MISSENSE	aaC/aaA	N3K	c.9C>A	Kbtbd11	ENSMUST00000069399	2	0.4091
4T1	chr6	56781865	.	G	C	NON_SYNONYMOUS_CODING	MODERATE	MISSENSE	aCa/aGa	T91R	c.272C>G	Kbtbd2	ENSMUST00000114321	3	0.2545
4T1	chr15	99242521	.	G	T	STOP_LOST	HIGH	MISSENSE	tGa/tTa	*1096Lext*?	c.3287G>T	Kcnh3	ENSMUST00000041415	15	0.1667
4T1	chr11	91576096	.	C	G	NON_SYNONYMOUS_CODING	MODERATE	MISSENSE	Gga/Cga	G454R	c.1360G>C	Kif2b	ENSMUST00000061019	1	0.3457
4T1	chr5	75654429	.	G	T	NON_SYNONYMOUS_CODING	MODERATE	MISSENSE	Gca/Tca	A950S	c.2848G>T	Kit	ENSMUST00000144270	21	0.1744
4T1	chr11	100447536	.	A	C	NON_SYNONYMOUS_CODING	MODERATE	MISSENSE	cAc/cCc	H367P	c.1100A>C	Klhl10	ENSMUST00000001599	3	0.2170
4T1	chr6	130115613	.	C	A	NON_SYNONYMOUS_CODING	MODERATE	MISSENSE	Gca/Tca	A242S	c.724G>T	Klra8	ENSMUST00000014476	7	1.0000
4T1	chr1	175639094	.	T	C	SPLICE_SITE_REGION+INTRON	LOW				c.223-6T>C	Kmo	ENSMUST00000040250	3	0.8209
4T1	chr17	67799129	.	G	A	NON_SYNONYMOUS_CODING	MODERATE	MISSENSE	Gtg/Atg	V2120M	c.6358G>A	Lama1	ENSMUST00000035471	44	0.4400
4T1	chrX	9251294	.	G	C	NON_SYNONYMOUS_CODING	MODERATE	MISSENSE	cGg/cCg	R257P	c.770G>C	Lancl3	ENSMUST00000069763	3	0.2800
4T1	chr2	121138562	.	G	T	NON_SYNONYMOUS_CODING	MODERATE	MISSENSE	tCt/tAt	S680Y	c.2039C>A	Lcmt2	ENSMUST00000110674	1	0.1220
4T1	chr1	155724947	.	C	A	NON_SYNONYMOUS_CODING	MODERATE	MISSENSE	Gct/Tct	A31S	c.91G>T	Lhx4	ENSMUST00000027740	2	0.5577
4T1	chr19	34020242	.	G	T	NON_SYNONYMOUS_CODING	MODERATE	MISSENSE	tGg/tTg	W46L	c.137G>T	Lipk	ENSMUST00000054260	3	0.3092
4T1	chr18	65998654	.	C	T	STOP_GAINED	HIGH	NONSENSE	tGg/tAg	W102*	c.305G>A	Lman1	ENSMUST00000048260	2	0.3043
4T1	chr17	84705982	.	A	T	NON_SYNONYMOUS_CODING	MODERATE	MISSENSE	Ttg/Atg	L1347M	c.4039T>A	Lrpprc	ENSMUST00000112308	37	0.4023
4T1	chr10	93474529	.	G	A	NON_SYNONYMOUS_CODING	MODERATE	MISSENSE	Gta/Ata	V420I	c.1258G>A	Lta4h	ENSMUST00000016033	13	0.9880
4T1	chr13	13637553	.	C	T	NON_SYNONYMOUS_CODING	MODERATE	MISSENSE	tCc/tTc	S850F	c.2549C>T	Lyst	ENSMUST00000110559	6	0.4667
4T1	chr18	65464814	.	A	G	NON_SYNONYMOUS_CODING	MODERATE	MISSENSE	Act/Gct	T523A	c.1567A>G	Malt1	ENSMUST00000049248	12	0.1739
4T1	chr17	64625355	.	GT	G	FRAME_SHIFT	HIGH		tgg/	W147fs	c.439delT	Man2a1	ENSMUST00000086723	3	0.1653
4T1	chr5	36824144	.	C	T	NON_SYNONYMOUS_CODING	MODERATE	MISSENSE	Gtc/Atc	V210I	c.628G>A	Man2b2	ENSMUST00000031002	5	0.2371
4T1	chr2	172249500	.	C	G	NON_SYNONYMOUS_CODING	MODERATE	MISSENSE	gCc/gGc	A214G	c.641C>G	Mc3r	ENSMUST00000038532	1	0.4808
4T1	chrX	169985007	.	C	G	NON_SYNONYMOUS_CODING	MODERATE	MISSENSE	Cct/Gct	P384A	c.1150C>G	Mid1	ENSMUST00000036753	7	0.1816
4T1	chr18	7442849	.	T	C	NON_SYNONYMOUS_CODING	MODERATE	MISSENSE	cAg/cGg	Q158R	c.473A>G	Mpp7	ENSMUST00000115869	7	0.1702
4T1	chr7	145321475	.	T	A	NON_SYNONYMOUS_CODING	MODERATE	MISSENSE	Tca/Aca	S28T	c.82T>A	Mrgprd	ENSMUST00000062163	2	0.2778
4T1	chr11	84815009	.	C	A	NON_SYNONYMOUS_CODING	MODERATE	MISSENSE	gGc/gTc	G221V	c.662G>T	Mrm1	ENSMUST00000018549	3	0.2895
4T1	chr1	163074721	.	C	A	NON_SYNONYMOUS_CODING	MODERATE	MISSENSE	Gac/Tac	D108Y	c.322G>T	Mroh9	ENSMUST00000096608	6	0.1875
4T1	chr6	81962421	.	A	T	NON_SYNONYMOUS_CODING	MODERATE	MISSENSE	gaT/gaA	D184E	c.552T>A	Mrpl19	ENSMUST00000032124	4	0.4058
4T1	chr11	58176163	.	C	T	NON_SYNONYMOUS_CODING	MODERATE	MISSENSE	gCg/gTg	A98V	c.293C>T	Mrpl22	ENSMUST00000020820	5	0.1337
4T1	chr4	107061925	.	C	CGAT	CODON_INSERTION	MODERATE		atc/atcATC	I263dup	c.787_789dupATC	Mrpl37	ENSMUST00000030365	4	0.4299
4T1	chr7	141793944	.	G	C	NON_SYNONYMOUS_CODING	MODERATE	MISSENSE	Gct/Cct	A430P	c.1288G>C	Muc5ac	ENSMUST00000155534	11	0.3211
4T1	chr10	88553289	.	C	CG	FRAME_SHIFT	HIGH		acc/accC	G406fs	c.1215dupC	Mybpc1	ENSMUST00000119185	12	0.1652
4T1	chr5	114351678	.	G	C	NON_SYNONYMOUS_CODING	MODERATE	MISSENSE	gGa/gCa	G648A	c.1943G>C	Myo1h	ENSMUST00000169347	19	0.2024
4T1	chr11	65180915	.	C	T	NON_SYNONYMOUS_CODING	MODERATE	MISSENSE	Gaa/Aaa	E784K	c.2350G>A	Myocd	ENSMUST00000108695	13	1.0000
4T1	chr10	109714242	.	C	G	NON_SYNONYMOUS_CODING	MODERATE	MISSENSE	Gtt/Ctt	V1876L	c.5626G>C	Nav3	ENSMUST00000032719	29	0.1750
4T1	chr2	17424577	.	G	A	NON_SYNONYMOUS_CODING	MODERATE	MISSENSE	Cct/Tct	P248S	c.742C>T	Nebl	ENSMUST00000124270	8	0.5946
4T1	chr11	79441703	.	G	C	SPLICE_SITE_DONOR+INTRON	HIGH				c.2331+1G>C	Nf1	ENSMUST00000071325	19	0.3594
4T1	chr7	107182062	.	C	G	NON_SYNONYMOUS_CODING	MODERATE	MISSENSE	agC/agG	S155R	c.465C>G	Nlrp14	ENSMUST00000084763	3	0.3091
4T1	chr15	79833699	.	C	A	SPLICE_SITE_REGION+INTRON	LOW				c.179+3G>T	Npcd	ENSMUST00000089299	3	0.1515
4T1	chr8	71380992	.	G	A	NON_SYNONYMOUS_CODING+SPLICE_SITE_REGION	MODERATE	MISSENSE	Cgg/Tgg	R94W	c.280C>T	Nr2f6	ENSMUST00000002466	1	0.9756
4T1	chr10	117785073	.	T	G	NON_SYNONYMOUS_CODING	MODERATE	MISSENSE	Aac/Cac	N125H	c.373A>C	Nup107	ENSMUST00000064848	5	0.2800
4T1	chr2	86374491	.	T	C	NON_SYNONYMOUS_CODING	MODERATE	MISSENSE	aAt/aGt	N307S	c.920A>G	Olfr1057	ENSMUST00000099892	1	0.5402
4T1	chr2	89014004	.	T	C	NON_SYNONYMOUS_CODING	MODERATE	MISSENSE	aAa/aGa	K20R	c.59A>G	Olfr1216	ENSMUST00000099800	1	0.2991
4T1	chr2	111292891	.	A	G	NON_SYNONYMOUS_CODING	MODERATE	MISSENSE	Atg/Gtg	M208V	c.622A>G	Olfr1278	ENSMUST00000090330	1	0.5000
4T1	chr16	19515346	.	C	G	NON_SYNONYMOUS_CODING	MODERATE	MISSENSE	Gga/Cga	G97R	c.289G>C	Olfr167	ENSMUST00000054606	1	0.1395
4T1	chr7	107815299	.	C	A	NON_SYNONYMOUS_CODING	MODERATE	MISSENSE	ttC/ttA	F240L	c.720C>A	Olfr467	ENSMUST00000084756	1	0.2456
4T1	chr2	36793673	.	A	G	NON_SYNONYMOUS_CODING	MODERATE	MISSENSE	Atg/Gtg	M146V	c.436A>G	Olfr50	ENSMUST00000072114	1	0.4650
4T1	chr9	19783712	.	C	A	NON_SYNONYMOUS_CODING	MODERATE	MISSENSE	aCt/aAt	T193N	c.578C>A	Olfr58	ENSMUST00000079660	2	0.3115
4T1	chr7	103598185	.	G	A	NON_SYNONYMOUS_CODING	MODERATE	MISSENSE	Gca/Aca	A290T	c.868G>A	Olfr618	ENSMUST00000098197	1	0.4510
4T1	chr7	103979370	.	G	C	NON_SYNONYMOUS_CODING	MODERATE	MISSENSE	caG/caC	Q65H	c.195G>C	Olfr635	ENSMUST00000098185	1	0.4094
4T1	chr9	19921108	.	G	T	NON_SYNONYMOUS_CODING	MODERATE	MISSENSE	Gcc/Tcc	A300S	c.898G>T	Olfr77	ENSMUST00000057596	3	0.8548
4T1	chr9	19318908	.	G	T	NON_SYNONYMOUS_CODING	MODERATE	MISSENSE	Gcc/Tcc	A125S	c.373G>T	Olfr844	ENSMUST00000054106	1	0.1702
4T1	chr9	19883823	.	A	C	NON_SYNONYMOUS_CODING	MODERATE	MISSENSE	Ttc/Gtc	F161V	c.481T>G	Olfr862	ENSMUST00000073765	1	0.4545
4T1	chr9	37992795	.	G	A	NON_SYNONYMOUS_CODING	MODERATE	MISSENSE	tGc/tAc	C101Y	c.302G>A	Olfr881	ENSMUST00000074611	1	0.3766
4T1	chr9	39078618	.	G	T	NON_SYNONYMOUS_CODING	MODERATE	MISSENSE	aaC/aaA	N42K	c.126C>A	Olfr938	ENSMUST00000056499	1	0.3570
4T1	chr9	40001002	.	G	T	NON_SYNONYMOUS_CODING	MODERATE	MISSENSE	aCa/aAa	T75K	c.224C>A	Olfr979	ENSMUST00000080835	1	0.6158
4T1	chr8	61709018	.	C	G	NON_SYNONYMOUS_CODING	MODERATE	MISSENSE	gGc/gCc	G444A	c.1331G>C	Palld	ENSMUST00000121785	6	0.2978
4T1	chr18	37732903	.	G	A	NON_SYNONYMOUS_CODING	MODERATE	MISSENSE	Gta/Ata	V584I	c.1750G>A	Pcdhgb5	ENSMUST00000192535	1	0.8571
4T1	chr18	37756121	.	G	A	NON_SYNONYMOUS_CODING	MODERATE	MISSENSE	Gaa/Aaa	E61K	c.181G>A	PCDHGB6	ENSMUST00000061279	1	0.2258
4T1	chr10	76370049	.	C	A	STOP_GAINED	HIGH	NONSENSE	Gag/Tag	E2508*	c.7522G>T	Pcnt	ENSMUST00000001179	34	0.3000
4T1	chr9	45909708	.	A	C	NON_SYNONYMOUS_CODING	MODERATE	MISSENSE	gAt/gCt	D146A	c.437A>C	Pcsk7	ENSMUST00000039059	3	0.2632
4T1	chr13	95222496	.	C	A	NON_SYNONYMOUS_CODING	MODERATE	MISSENSE	caG/caT	Q106H	c.318G>T	Pde8b	ENSMUST00000067082	1	0.4000
4T1	chr2	30081194	.	C	A	NON_SYNONYMOUS_CODING	MODERATE	MISSENSE	Ccc/Acc	P258T	c.772C>A	Pkn3	ENSMUST00000045246	6	0.2308
4T1	chr11	69740416	.	C	T	NON_SYNONYMOUS_CODING	MODERATE	MISSENSE	atG/atA	M1102I	c.3306G>A	Polr2a	ENSMUST00000058470	20	0.6638
4T1	chr14	24475856	.	T	A	STOP_GAINED	HIGH	NONSENSE	Aag/Tag	K439*	c.1315A>T	Polr3a	ENSMUST00000026322	10	0.2785
4T1	chr12	55281733	.	G	T	NON_SYNONYMOUS_CODING	MODERATE	MISSENSE	Caa/Aaa	Q416K	c.1246C>A	Ppp2r3c	ENSMUST00000021410	14	0.1304
4T1	chr17	33644905	.	A	T	NON_SYNONYMOUS_CODING	MODERATE	MISSENSE	cAg/cTg	Q572L	c.1715A>T	Pram1	ENSMUST00000052079	6	0.9831
4T1	chr11	87097165	.	C	G	NON_SYNONYMOUS_CODING	MODERATE	MISSENSE	cGg/cCg	R304P	c.911G>C	Prr11	ENSMUST00000051395	8	0.1234
4T1	chr9	98843079	.	G	T	NON_SYNONYMOUS_CODING	MODERATE	MISSENSE	Gct/Tct	A165S	c.493G>T	Prr23a	ENSMUST00000170349	1	1.0000
4T1	chr9	72945398	.	G	C	NON_SYNONYMOUS_CODING	MODERATE	MISSENSE	gGc/gCc	G289A	c.866G>C	Pygo1	ENSMUST00000038489	3	0.6000
4T1	chr6	128489120	.	C	T	NON_SYNONYMOUS_CODING	MODERATE	MISSENSE	gGg/gAg	G1199E	c.3596G>A	Pzp	ENSMUST00000032510	29	0.5507
4T1	chr9	108513956	.	G	T	NON_SYNONYMOUS_CODING	MODERATE	MISSENSE	gaG/gaT	E530D	c.1590G>T	Qars	ENSMUST00000006838	17	0.4731
4T1	chr10	22371400	.	C	T	NON_SYNONYMOUS_CODING	MODERATE	MISSENSE	cCg/cTg	P125L	c.374C>T	Raet1d	ENSMUST00000095795	5	0.3617
4T1	chr10	22371418	.	C	T	NON_SYNONYMOUS_CODING	MODERATE	MISSENSE	aCt/aTt	T131I	c.392C>T	Raet1d	ENSMUST00000095795	5	0.3902
4T1	chr10	22372178	.	C	CT	SPLICE_SITE_REGION+INTRON	LOW				c.605-5dupT	Raet1d	ENSMUST00000095795	5	0.3642
4T1	chr10	22181158	.	C	T	NON_SYNONYMOUS_CODING	MODERATE	MISSENSE	cCg/cTg	P127L	c.380C>T	Raet1e	ENSMUST00000065527	5	0.2845
4T1	chr10	22181176	.	C	T	NON_SYNONYMOUS_CODING	MODERATE	MISSENSE	aCt/aTt	T133I	c.398C>T	Raet1e	ENSMUST00000065527	5	0.3231
4T1	chr5	128771720	.	A	C	NON_SYNONYMOUS_CODING	MODERATE	MISSENSE	Tct/Gct	S996A	c.2986T>G	Rimbp2	ENSMUST00000111346	19	0.4474
4T1	chr6	23648935	.	G	C	NON_SYNONYMOUS_CODING	MODERATE	MISSENSE	Cct/Gct	P375A	c.1123C>G	Rnf133	ENSMUST00000115354	1	0.5517
4T1	chr12	16926964	.	A	T	NON_SYNONYMOUS_CODING	MODERATE	MISSENSE	gAt/gTt	D56V	c.167A>T	Rock2	ENSMUST00000020904	2	0.3077
4T1	chr12	16926969	.	G	A	NON_SYNONYMOUS_CODING	MODERATE	MISSENSE	Gat/Aat	D58N	c.172G>A	Rock2	ENSMUST00000020904	2	0.3077
4T1	chr4	86854887	.	G	A	NON_SYNONYMOUS_CODING	MODERATE	MISSENSE	Cgc/Tgc	R189C	c.565C>T	Rps6	ENSMUST00000102814	5	0.2128
4T1	chr2	65751954	.	A	T	NON_SYNONYMOUS_CODING	MODERATE	MISSENSE	Atg/Ttg	M1549L	c.4645A>T	Scn2a1	ENSMUST00000028377	26	0.2478
4T1	chr6	54534489	.	A	C	NON_SYNONYMOUS_CODING	MODERATE	MISSENSE	Tgc/Ggc	C89G	c.265T>G	Scrn1	ENSMUST00000019268	3	0.4538
4T1	chr1	157538254	.	C	A	NON_SYNONYMOUS_CODING	MODERATE	MISSENSE	Ctc/Atc	L418I	c.1252C>A	Sec16b	ENSMUST00000027881	11	0.5354
4T1	chr12	103980367	.	G	A	NON_SYNONYMOUS_CODING	MODERATE	MISSENSE	gCt/gTt	A425V	c.1274C>T	Serpina11	ENSMUST00000074693	5	0.6000
4T1	chr12	103949258	.	C	T	NON_SYNONYMOUS_CODING	MODERATE	MISSENSE	Gag/Aag	E230K	c.688G>A	Serpina1e	ENSMUST00000085054	3	1.0000
4T1	chr13	33918414	.	A	C	NON_SYNONYMOUS_CODING	MODERATE	MISSENSE	tTt/tGt	F276C	c.827T>G	Serpinb6a	ENSMUST00000017188	8	0.1148
4T1	chr7	27489247	.	C	A	SPLICE_SITE_REGION+INTRON	LOW				c.-3-6C>A	Sertad1	ENSMUST00000008528	1	0.2500
4T1	chr8	110844476	.	A	T	NON_SYNONYMOUS_CODING	MODERATE	MISSENSE	caT/caA	H19Q	c.57T>A	Sf3b3	ENSMUST00000042012	2	0.1319
4T1	chr11	94970668	.	C	T	SPLICE_SITE_REGION+INTRON	LOW				c.747+3G>A	Sgca	ENSMUST00000100551	6	0.2245
4T1	chr4	126151659	.	T	C	NON_SYNONYMOUS_CODING	MODERATE	MISSENSE	gAg/gGg	E409G	c.1226A>G	Sh3d21	ENSMUST00000097891	14	0.9750
4T1	chr15	89547634	.	G	T	STOP_GAINED	HIGH	NONSENSE	Gag/Tag	E861*	c.2581G>T	Shank3	ENSMUST00000109309	21	0.2727
4T1	chr2	165420037	.	C	A	NON_SYNONYMOUS_CODING	MODERATE	MISSENSE	tgG/tgT	W425C	c.1275G>T	Slc13a3	ENSMUST00000029208	10	0.2222
4T1	chr11	120958122	.	C	G	NON_SYNONYMOUS_CODING	MODERATE	MISSENSE	aCc/aGc	T468S	c.1403C>G	Slc16a3	ENSMUST00000070653	6	0.5000
4T1	chr1	83022740	.	G	T	NON_SYNONYMOUS_CODING	MODERATE	MISSENSE	ttC/ttA	F185L	c.555C>A	Slc19a3	ENSMUST00000045560	4	0.5938
4T1	chr5	67334571	.	G	C	NON_SYNONYMOUS_CODING	MODERATE	MISSENSE	gGc/gCc	G247A	c.740G>C	Slc30a9	ENSMUST00000162372	9	0.3036
4T1	chr7	123269146	.	C	A	NON_SYNONYMOUS_CODING	MODERATE	MISSENSE	Cac/Aac	H520N	c.1558C>A	Slc5a11	ENSMUST00000033035	15	0.1186
4T1	chr8	92990127	.	T	A	NON_SYNONYMOUS_CODING+SPLICE_SITE_REGION	MODERATE	MISSENSE	gTa/gAa	V307E	c.920T>A	Slc6a2	ENSMUST00000072939	6	0.1706
4T1	chr5	144881615	.	C	T	SPLICE_SITE_REGION+INTRON	LOW				c.2089+3G>A	Smurf1	ENSMUST00000110677	17	0.4255
4T1	chr12	36317162	.	C	G	NON_SYNONYMOUS_CODING	MODERATE	MISSENSE	aaC/aaG	N112K	c.336C>G	Sostdc1	ENSMUST00000041407	2	0.4074
4T1	chr15	79156287	.	T	G	NON_SYNONYMOUS_CODING	MODERATE	MISSENSE	gAt/gCt	D351A	c.1052A>C	Sox10	ENSMUST00000040019	4	0.1905
4T1	chr6	24796482	.	T	G	NON_SYNONYMOUS_CODING	MODERATE	MISSENSE	aTt/aGt	I144S	c.431T>G	Spam1	ENSMUST00000031693	1	0.2261
4T1	chr1	187117442	.	G	C	NON_SYNONYMOUS_CODING	MODERATE	MISSENSE	Cga/Gga	R199G	c.595C>G	Spata17	ENSMUST00000027908	7	0.2162
4T1	chr11	20005776	.	C	A	SPLICE_SITE_REGION+INTRON	LOW				c.286-6C>A	Spred2	ENSMUST00000093299	3	0.3750
4T1	chr7	27361574	.	A	G	NON_SYNONYMOUS_CODING	MODERATE	MISSENSE	Tcc/Ccc	S2435P	c.7303T>C	Sptbn4	ENSMUST00000011895	33	0.3333
4T1	chr17	86001530	.	C	T	NON_SYNONYMOUS_CODING	MODERATE	MISSENSE	cGa/cAa	R740Q	c.2219G>A	Srbd1	ENSMUST00000095187	18	0.2556
4T1	chrX	8330078	.	G	A	NON_SYNONYMOUS_CODING	MODERATE	MISSENSE	Gtg/Atg	V14M	c.40G>A	Ssxb10	ENSMUST00000103003	2	0.9870
4T1	chr17	55482183	.	A	C	NON_SYNONYMOUS_CODING	MODERATE	MISSENSE	Agt/Cgt	S73R	c.217A>C	St6gal2	ENSMUST00000025000	2	0.3415
4T1	chr18	64269828	.	A	C	NON_SYNONYMOUS_CODING	MODERATE	MISSENSE	ttA/ttC	L235F	c.705A>C	St8sia3	ENSMUST00000025477	5	0.2323
4T1	chr5	151045164	.	C	G	NON_SYNONYMOUS_CODING	MODERATE	MISSENSE	caG/caC	Q1017H	c.3051G>C	Stard13	ENSMUST00000062015	12	0.1607
4T1	chr7	13796427	.	T	A	NON_SYNONYMOUS_CODING	MODERATE	MISSENSE	caA/caT	Q262H	c.786A>T	Sult2a1	ENSMUST00000108522	6	0.5073
4T1	chr6	42040102	.	A	C	NON_SYNONYMOUS_CODING	MODERATE	MISSENSE	Aca/Cca	T48P	c.142A>C	Sva	ENSMUST00000117406	2	0.4455
4T1	chr7	107436358	.	G	C	NON_SYNONYMOUS_CODING	MODERATE	MISSENSE	gGg/gCg	G194A	c.581G>C	Syt9	ENSMUST00000073459	3	0.1429
4T1	chr11	77577331	.	A	G	NON_SYNONYMOUS_CODING	MODERATE	MISSENSE	tTa/tCa	L115S	c.344T>C	Taok1	ENSMUST00000017435	4	0.3261
4T1	chr6	132803577	.	G	A	NON_SYNONYMOUS_CODING	MODERATE	MISSENSE	gGc/gAc	G226D	c.677G>A	Tas2r117	ENSMUST00000068302	1	0.1596
4T1	chr10	80417365	.	C	T	NON_SYNONYMOUS_CODING	MODERATE	MISSENSE	aGc/aAc	S255N	c.764G>A	Tcf3	ENSMUST00000105342	10	0.3889
4T1	chrX	138208215	.	T	C	NON_SYNONYMOUS_CODING	MODERATE	MISSENSE	Att/Gtt	I372V	c.1114A>G	Tex13a	ENSMUST00000096314	2	0.2333
4T1	chr9	106224507	.	C	A	NON_SYNONYMOUS_CODING	MODERATE	MISSENSE	aaC/aaA	N332K	c.996C>A	Tlr9	ENSMUST00000062241	2	0.1333
4T1	chr6	83068876	.	G	T	NON_SYNONYMOUS_CODING	MODERATE	MISSENSE	cCg/cAg	P246Q	c.737C>A	Tlx2	ENSMUST00000089641	3	0.4839
4T1	chr2	85058944	.	G	T	NON_SYNONYMOUS_CODING	MODERATE	MISSENSE	gaG/gaT	E538D	c.1614G>T	Tnks1bp1	ENSMUST00000111605	5	0.1176
4T1	chr3	154872192	.	G	T	NON_SYNONYMOUS_CODING	MODERATE	MISSENSE	Cag/Aag	Q637K	c.1909C>A	Tnni3k	ENSMUST00000064076	20	0.7222
4T1	chr9	114512926	.	G	A	NON_SYNONYMOUS_CODING	MODERATE	MISSENSE	Cct/Tct	P763S	c.2287C>T	Trim71	ENSMUST00000111816	4	0.3333
4T1	chr15	58873862	.	AG	A	FRAME_SHIFT	HIGH		gaa/	E372fs	c.1114delG	Trmt12	ENSMUST00000036937	1	0.1850
4T1	chr11	69587265	.	C	CA	FRAME_SHIFT	HIGH		gaa/Agaa	E32fs	c.93dupA	Trp53	ENSMUST00000108658	3	1.0000
4T1	chr16	94451047	.	C	T	NON_SYNONYMOUS_CODING	MODERATE	MISSENSE	Ctc/Ttc	L1533F	c.4597C>T	Ttc3	ENSMUST00000117648	36	0.1429
4T1	chr9	55149697	.	C	A	NON_SYNONYMOUS_CODING	MODERATE	MISSENSE	caC/caA	H21Q	c.63C>A	Ube2q2	ENSMUST00000059555	1	0.4000
4T1	chr9	55149730	.	C	G	NON_SYNONYMOUS_CODING	MODERATE	MISSENSE	gaC/gaG	D32E	c.96C>G	Ube2q2	ENSMUST00000059555	1	0.5000
4T1	chr9	57592982	.	G	T	SPLICE_SITE_REGION+INTRON	LOW				c.852+8G>T	Ulk3	ENSMUST00000053230	7	0.1429
4T1	chr11	67879946	.	G	A	NON_SYNONYMOUS_CODING	MODERATE	MISSENSE	Cgg/Tgg	R621W	c.1861C>T	Usp43	ENSMUST00000021288	12	0.1918
4T1	chr17	35013310	.	G	A	NON_SYNONYMOUS_CODING	MODERATE	MISSENSE	Ggc/Agc	G821S	c.2461G>A	Vars	ENSMUST00000173584	21	0.2414
4T1	chr10	93974551	.	G	T	SPLICE_SITE_REGION+INTRON	LOW				c.1535-6C>A	Vezt	ENSMUST00000119818	9	0.1290
4T1	chr17	21314911	.	G	A	SPLICE_SITE_REGION	LOW				c.*25G>A	Vmn1r237	ENSMUST00000077301	1	1.0000
4T1	chr6	58265474	.	C	T	STOP_GAINED	HIGH	NONSENSE	Cag/Tag	Q101*	c.301C>T	Vmn1r28	ENSMUST00000176874	1	0.2525
4T1	chr7	13219463	.	A	T	NON_SYNONYMOUS_CODING	MODERATE	MISSENSE	aAg/aTg	K42M	c.125A>T	Vmn1r89	ENSMUST00000053008	1	0.5404
4T1	chr6	57071318	.	T	A	NON_SYNONYMOUS_CODING	MODERATE	MISSENSE	gTt/gAt	V126D	c.377T>A	Vmn1r9	ENSMUST00000171186	1	0.5161
4T1	chr17	23401749	.	CA	C	FRAME_SHIFT	HIGH		gca/	A819fs	c.2457delA	Vmn2r116	ENSMUST00000164856	6	0.7938
4T1	chr7	42926875	.	G	T	NON_SYNONYMOUS_CODING	MODERATE	MISSENSE	Caa/Aaa	Q505K	c.1513C>A	Vmn2r63	ENSMUST00000163803	4	0.4176
4T1	chr13	66355006	.	C	A	NON_SYNONYMOUS_CODING	MODERATE	MISSENSE	Gac/Tac	D78Y	c.232G>T	Vmn2r-ps104	ENSMUST00000099416	2	0.6667
4T1	chr11	16261478	.	C	A	NON_SYNONYMOUS_CODING	MODERATE	MISSENSE	aCc/aAc	T96N	c.287C>A	Vstm2a	ENSMUST00000109647	3	0.1124
4T1	chr17	35024882	.	C	G	NON_SYNONYMOUS_CODING	MODERATE	MISSENSE	gCc/gGc	A785G	c.2354C>G	Vwa7	ENSMUST00000007245	16	0.2250
4T1	chr18	31827321	.	C	T	NON_SYNONYMOUS_CODING	MODERATE	MISSENSE	Cat/Tat	H13Y	c.37C>T	Wdr33	ENSMUST00000025264	2	0.4016
4T1	chr3	146042780	.	G	A	NON_SYNONYMOUS_CODING	MODERATE	MISSENSE	Cgt/Tgt	R860C	c.2578C>T	Wdr63	ENSMUST00000160285	22	0.1882
4T1	chr5	117371119	.	A	G	NON_SYNONYMOUS_CODING	MODERATE	MISSENSE	cAa/cGa	Q155R	c.464A>G	Wsb2	ENSMUST00000111959	3	0.4133
4T1	chrX	95927194	.	C	A	NON_SYNONYMOUS_CODING	MODERATE	MISSENSE	Ccc/Acc	P578T	c.1732C>A	Zc3h12b	ENSMUST00000082183	5	0.2500
4T1	chr5	137799571	.	C	G	NON_SYNONYMOUS_CODING	MODERATE	MISSENSE	cCt/cGt	P138R	c.413C>G	Zcwpw1	ENSMUST00000035852	5	0.1527
4T1	chr7	12891042	.	G	T	NON_SYNONYMOUS_CODING	MODERATE	MISSENSE	Ggc/Tgc	G446C	c.1336G>T	Zfp128	ENSMUST00000144578	4	0.2174
4T1	chr1	74570971	.	G	A	NON_SYNONYMOUS_CODING	MODERATE	MISSENSE	Cgc/Tgc	R1222C	c.3664C>T	Zfp142	ENSMUST00000027315	7	1.0000
4T1	chr15	12150180	.	A	C	NON_SYNONYMOUS_CODING	MODERATE	MISSENSE	aAa/aCa	K411T	c.1232A>C	Zfr	ENSMUST00000122941	8	0.5288
4T1	chr3	152455903	.	A	T	NON_SYNONYMOUS_CODING	MODERATE	MISSENSE	aaA/aaT	K812N	c.2436A>T	Zzz3	ENSMUST00000106100	12	0.3318
4T1	chr2	31800415	NA	C	G	NON_SYNONYMOUS_CODING	NA	MISSENSE	NA	NM_001112703:c.C1945G:p.R649G	NA	Abl1	NM_001112703:c.C1945G:p.R649G	NA	0.1440
4T1	chr17	72380150	NA	T	A	NON_SYNONYMOUS_CODING	NA	MISSENSE	NA	NM_007439:c.A694T:p.M232L	NA	Alk	NM_007439:c.A694T:p.M232L	NA	0.9972
4T1	chr17	71967567	NA	C	T	NON_SYNONYMOUS_CODING	NA	MISSENSE	NA	NM_007439:c.G1748A:p.R583Q	NA	Alk	NM_007439:c.G1748A:p.R583Q	NA	0.9911
4T1	chr17	72360580	NA	C	A	NON_SYNONYMOUS_CODING	NA	MISSENSE	NA	NM_007439:c.G942T:p.E314D	NA	Alk	NM_007439:c.G942T:p.E314D	NA	1.0000
4T1	chr18	34315736	NA	G	T	NON_SYNONYMOUS_CODING	NA	MISSENSE	NA	NM_007462:c.G5684T:p.R1895L	NA	Apc	NM_007462:c.G5684T:p.R1895L	NA	1.0000
4T1	chr9	53480726	NA	T	C	NON_SYNONYMOUS_CODING	NA	MISSENSE	NA	NM_007499:c.A5362G:p.K1788E	NA	Atm	NM_007499:c.A5362G:p.K1788E	NA	0.1049
4T1	chr8	106656929	NA	C	G	NON_SYNONYMOUS_CODING	NA	MISSENSE	NA	NM_009864:c.C799G:p.P267A	NA	Cdh1	NM_009864:c.C799G:p.P267A	NA	1.0000
4T1	chr8	106656930	NA	C	A	NON_SYNONYMOUS_CODING	NA	MISSENSE	NA	NM_009864:c.C800A:p.P267Q	NA	Cdh1	NM_009864:c.C800A:p.P267Q	NA	0.9968
4T1	chr3	84903756	NA	A	G	NON_SYNONYMOUS_CODING	NA	MISSENSE	NA	NM_001177774:c.A187G:p.N63D	NA	Fbxw7	NM_001177774:c.A187G:p.N63D	NA	1.0000
4T1	chr3	84952427	NA	T	C	NON_SYNONYMOUS_CODING	NA	MISSENSE	NA	NM_080428:c.T55C:p.W19R	NA	Fbxw7	NM_080428:c.T55C:p.W19R	NA	0.0755
4T1	chr7	130172884	NA	A	C	NON_SYNONYMOUS_CODING	NA	MISSENSE	NA	NM_201601:c.T1634G:p.M545R	NA	Fgfr2	NM_201601:c.T1634G:p.M545R	NA	0.2806
4T1	chr7	130172878	NA	A	T	NON_SYNONYMOUS_CODING	NA	MISSENSE	NA	NM_201601:c.T1640A:p.I547K	NA	Fgfr2	NM_201601:c.T1640A:p.I547K	NA	0.1959
4T1	chr5	114953366	NA	G	A	NON_SYNONYMOUS_CODING	NA	MISSENSE	NA	NM_009327:c.C1267T:p.P423S	NA	Hnf1a	NM_009327:c.C1267T:p.P423S	NA	0.9659
4T1	chr5	114952641	NA	A	G	NON_SYNONYMOUS_CODING	NA	MISSENSE	NA	NM_009327:c.T1436C:p.V479A	NA	Hnf1a	NM_009327:c.T1436C:p.V479A	NA	0.0813
4T1	chr7	80095625	NA	T	G	NON_SYNONYMOUS_CODING	NA	MISSENSE	NA	NM_173011:c.A1267C:p.S423R	NA	Idh2	NM_173011:c.A1267C:p.S423R	NA	0.0787
4T1	chr8	71687248	NA	A	C	NON_SYNONYMOUS_CODING	NA	MISSENSE	NA	NM_001190830:c.A3094C:p.S1032R	NA	Jak3	NM_001190830:c.A3094C:p.S1032R	NA	0.9967
4T1	chr8	71684276	NA	G	T	NON_SYNONYMOUS_CODING	NA	MISSENSE	NA	NM_001190830:c.G2095T:p.G699C	NA	Jak3	NM_001190830:c.G2095T:p.G699C	NA	1.0000
4T1	chr5	75654438	NA	A	G	NON_SYNONYMOUS_CODING	NA	MISSENSE	NA	NM_001122733:c.A2833G:p.N945D	NA	Kit	NM_001122733:c.A2833G:p.N945D	NA	0.0972
4T1	chr6	17558844	NA	A	T	NON_SYNONYMOUS_CODING	NA	MISSENSE	NA	NM_008591:c.A3470T:p.Y1157F	NA	Met	NM_008591:c.A3470T:p.Y1157F	NA	0.1322
4T1	chr6	17558846	NA	A	G	NON_SYNONYMOUS_CODING	NA	MISSENSE	NA	NM_008591:c.A3472G:p.M1158V	NA	Met	NM_008591:c.A3472G:p.M1158V	NA	0.1285
4T1	chr4	118455226	NA	C	T	NON_SYNONYMOUS_CODING	NA	MISSENSE	NA	NM_001122949:c.G745A:p.G249S	NA	Mpl	NM_001122949:c.G745A:p.G249S	NA	0.9980
4T1	chr11	4787511	NA	T	G	NON_SYNONYMOUS_CODING	NA	MISSENSE	NA	NM_001252250:c.A1379C:p.E460A	NA	Nf2	NM_001252250:c.A1379C:p.E460A	NA	0.1064
4T1	chr11	4787512	NA	C	T	NON_SYNONYMOUS_CODING	NA	MISSENSE	NA	NM_001252250:c.G1378A:p.E460K	NA	Nf2	NM_001252250:c.G1378A:p.E460K	NA	0.0985
4T1	chr13	63533344	NA	C	A	STOP_GAINED	NA	NONSENSE	NA	NM_008957:c.G2128T:p.E710X	NA	Ptch1	NM_008957:c.G2128T:p.E710X	NA	0.0736
B16F10 ATCC	chr11	105390359	.	C	A	NON_SYNONYMOUS_CODING	MODERATE	MISSENSE	Ggg/Tgg	G367W	c.1099G>T	March10	ENSMUST00000049995	7	0.1905
B16F10 ATCC	chr7	82858420	.	T	G	NON_SYNONYMOUS_CODING	MODERATE	MISSENSE	gTg/gGg	V124G	c.371T>G	1700010L04Rik	ENSMUST00000179662	4	0.2011
B16F10 ATCC	chr6	32058492	.	T	C	NON_SYNONYMOUS_CODING	MODERATE	MISSENSE	Tgg/Cgg	W36R	c.106T>C	1700012A03Rik	ENSMUST00000031778	3	0.2545
B16F10 ATCC	chr5	103649568	.	G	A	NON_SYNONYMOUS_CODING	MODERATE	MISSENSE	cCa/cTa	P25L	c.74C>T	1700016H13Rik	ENSMUST00000119824	3	0.3390
B16F10 ATCC	chr10	100605639	.	A	T	NON_SYNONYMOUS_CODING	MODERATE	MISSENSE	aAg/aTg	K224M	c.671A>T	1700017N19Rik	ENSMUST00000190708	7	0.2302
B16F10 ATCC	chr2	130405852	.	C	T	NON_SYNONYMOUS_CODING	MODERATE	MISSENSE	cCa/cTa	P77L	c.230C>T	1700020A23Rik	ENSMUST00000028898	2	0.4722
B16F10 ATCC	chrX	69945805	.	C	A	NON_SYNONYMOUS_CODING	MODERATE	MISSENSE	agC/agA	S102R	c.306C>A	1700020N15Rik	ENSMUST00000075654	2	0.3544
B16F10 ATCC	chr1	184033317	.	G	T	NON_SYNONYMOUS_CODING	MODERATE	MISSENSE	Ccc/Acc	P182T	c.544C>A	1700056E22Rik	ENSMUST00000050306	1	0.4085
B16F10 ATCC	chr17	48037084	.	G	T	NON_SYNONYMOUS_CODING	MODERATE	MISSENSE	cCt/cAt	P137H	c.410C>A	1700122O11Rik	ENSMUST00000178823	3	0.2099
B16F10 ATCC	chr5	138562556	.	A	C	SPLICE_SITE_REGION+INTRON	LOW				c.581-5T>G	1700123K08Rik	ENSMUST00000031501	4	0.2521
B16F10 ATCC	chr7	98600722	.	G	A	NON_SYNONYMOUS_CODING	MODERATE	MISSENSE	cCa/cTa	P786L	c.2357C>T	2210018M11Rik	ENSMUST00000038359	16	0.2184
B16F10 ATCC	chr13	77174891	.	A	C	NON_SYNONYMOUS_CODING	MODERATE	MISSENSE	gAc/gCc	D13A	c.38A>C	2210408I21Rik	ENSMUST00000168779	2	0.2955
B16F10 ATCC	chr15	74743101	.	C	A	NON_SYNONYMOUS_CODING	MODERATE	MISSENSE	Gtg/Ttg	V64L	c.190G>T	2300005B03Rik	ENSMUST00000057932	3	0.1226
B16F10 ATCC	chr5	87972306	.	G	T	NON_SYNONYMOUS_CODING	MODERATE	MISSENSE	caG/caT	Q307H	c.921G>T	2310003L06Rik	ENSMUST00000007601	3	0.6939
B16F10 ATCC	chr4	147944745	.	G	A	NON_SYNONYMOUS_CODING	MODERATE	MISSENSE	Gag/Aag	E391K	c.1171G>A	2510039O18Rik	ENSMUST00000103232	2	0.1923
B16F10 ATCC	chr14	4350847	.	A	T	NON_SYNONYMOUS_CODING	MODERATE	MISSENSE	aAg/aTg	K127M	c.380A>T	2610042L04Rik	ENSMUST00000112778	4	0.2979
B16F10 ATCC	chr2	85484181	.	T	G	NON_SYNONYMOUS_CODING	MODERATE	MISSENSE	aAg/aCg	K476T	c.1427A>C	4833423E24Rik	ENSMUST00000099923	12	0.4610
B16F10 ATCC	chr2	85502077	.	C	A	NON_SYNONYMOUS_CODING	MODERATE	MISSENSE	aGc/aTc	S201I	c.602G>T	4833423E24Rik	ENSMUST00000099923	3	0.2200
B16F10 ATCC	chr2	19494236	.	C	T	SPLICE_SITE_REGION+INTRON	LOW				c.949-4G>A	4921504E06Rik	ENSMUST00000062060	9	0.1449
B16F10 ATCC	chr8	85412303	.	G	A	SPLICE_SITE_REGION+INTRON	LOW				c.164-8C>T	4921524J17Rik	ENSMUST00000047749	2	0.2556
B16F10 ATCC	chr5	146504708	.	C	T	NON_SYNONYMOUS_CODING	MODERATE	MISSENSE	Cca/Tca	P222S	c.664C>T	4930449I24Rik	ENSMUST00000110598	5	0.2928
B16F10 ATCC	chr7	104128971	.	T	A	NON_SYNONYMOUS_CODING	MODERATE	MISSENSE	aaA/aaT	K215N	c.645A>T	4931431F19Rik	ENSMUST00000053743	1	0.5065
B16F10 ATCC	chr11	29825007	.	C	G	NON_SYNONYMOUS_CODING	MODERATE	MISSENSE	gGc/gCc	G167A	c.500G>C	4931440F15Rik	ENSMUST00000104962	1	0.1875
B16F10 ATCC	chr3	36987567	.	A	C	NON_SYNONYMOUS_CODING	MODERATE	MISSENSE	gAg/gCg	E2697A	c.8090A>C	4932438A13Rik	ENSMUST00000057272	47	0.2330
B16F10 ATCC	chr16	91055813	.	T	A	NON_SYNONYMOUS_CODING	MODERATE	MISSENSE	cAt/cTt	H145L	c.434A>T	4932438H23Rik	ENSMUST00000035689	3	0.2124
B16F10 ATCC	chr8	105709763	.	G	A	NON_SYNONYMOUS_CODING	MODERATE	MISSENSE	gGg/gAg	G197E	c.590G>A	4933405L10Rik	ENSMUST00000013302	4	0.2464
B16F10 ATCC	chr15	60015896	.	A	T	NON_SYNONYMOUS_CODING	MODERATE	MISSENSE	Tca/Aca	S232T	c.694T>A	4933412E24Rik	ENSMUST00000096421	1	0.2132
B16F10 ATCC	chr7	131246633	.	T	C	NON_SYNONYMOUS_CODING	MODERATE	MISSENSE	Tgt/Cgt	C723R	c.2167T>C	5430419D17Rik	ENSMUST00000050586	21	0.2078
B16F10 ATCC	chr7	118796972	.	G	A	NON_SYNONYMOUS_CODING	MODERATE	MISSENSE	Gaa/Aaa	E549K	c.1645G>A	9030624J02Rik	ENSMUST00000059390	19	0.2022
B16F10 ATCC	chr19	45818905	.	T	C	NON_SYNONYMOUS_CODING	MODERATE	MISSENSE	gAg/gGg	E684G	c.2051A>G	9130011E15Rik	ENSMUST00000045396	26	0.1667
B16F10 ATCC	chr4	144528669	.	C	A	NON_SYNONYMOUS_CODING	MODERATE	MISSENSE	Ctg/Atg	L220M	c.658C>A	9430007A20Rik	ENSMUST00000030328	4	0.5618
B16F10 ATCC	chr10	83576741	.	C	G	NON_SYNONYMOUS_CODING	MODERATE	MISSENSE	gCc/gGc	A749G	c.2246C>G	A230046K03Rik	ENSMUST00000038388	22	0.2051
B16F10 ATCC	chr8	99421862	.	AT	A	FRAME_SHIFT	HIGH		ttt/	F134fs	c.402delT	A330008L17Rik	ENSMUST00000064349	3	0.2125
B16F10 ATCC	chr9	99613841	.	C	T	NON_SYNONYMOUS_CODING	MODERATE	MISSENSE	tCg/tTg	S110L	c.329C>T	A4gnt	ENSMUST00000042553	2	0.5439
B16F10 ATCC	chr13	19729209	.	C	T	STOP_GAINED	HIGH	NONSENSE	tgG/tgA	W224*	c.672G>A	A530099J19Rik	ENSMUST00000151029	2	0.6743
B16F10 ATCC	chr6	86971070	.	A	C	NON_SYNONYMOUS_CODING	MODERATE	MISSENSE	caA/caC	Q781H	c.2343A>C	Aak1	ENSMUST00000089519	16	0.1263
B16F10 ATCC	chr6	86983884	.	A	G	NON_SYNONYMOUS_CODING	MODERATE	MISSENSE	gAg/gGg	E879G	c.2636A>G	Aak1	ENSMUST00000089519	19	0.1315
B16F10 ATCC	chr11	9294687	.	A	C	NON_SYNONYMOUS_CODING	MODERATE	MISSENSE	caA/caC	Q2183H	c.6549A>C	Abca13	ENSMUST00000042740	17	0.1796
B16F10 ATCC	chr7	120216135	.	T	A	NON_SYNONYMOUS_CODING	MODERATE	MISSENSE	aTc/aAc	I202N	c.605T>A	Abca14	ENSMUST00000084640	6	0.1781
B16F10 ATCC	chr17	24279079	.	T	A	NON_SYNONYMOUS_CODING	MODERATE	MISSENSE	aAg/aTg	K1428M	c.4283A>T	Abca17	ENSMUST00000039324	25	0.2597
B16F10 ATCC	chr17	24279107	.	G	T	NON_SYNONYMOUS_CODING	MODERATE	MISSENSE	Ccc/Acc	P1419T	c.4255C>A	Abca17	ENSMUST00000039324	25	0.2892
B16F10 ATCC	chr17	24346219	.	C	G	NON_SYNONYMOUS_CODING	MODERATE	MISSENSE	Gct/Cct	A80P	c.238G>C	Abca17	ENSMUST00000039324	2	0.1722
B16F10 ATCC	chr11	110182845	.	C	T	SPLICE_SITE_REGION+INTRON	LOW				c.4376+3G>A	Abca6	ENSMUST00000044003	34	0.2748
B16F10 ATCC	chr11	109976482	.	A	T	NON_SYNONYMOUS_CODING	MODERATE	MISSENSE	aTg/aAg	M250K	c.749T>A	Abca8b	ENSMUST00000020948	6	0.1608
B16F10 ATCC	chr16	14410809	.	C	A	NON_SYNONYMOUS_CODING	MODERATE	MISSENSE	Cac/Aac	H307N	c.919C>A	Abcc1	ENSMUST00000100167	8	0.2532
B16F10 ATCC	chr7	46138065	.	A	G	NON_SYNONYMOUS_CODING	MODERATE	MISSENSE	Ttc/Ctc	F571L	c.1711T>C	Abcc8	ENSMUST00000033123	12	0.5625
B16F10 ATCC	chr6	58678274	.	A	C	SPLICE_SITE_ACCEPTOR+INTRON	HIGH				c.1195-2A>C	Abcg2	ENSMUST00000031822	9	0.1389
B16F10 ATCC	chr7	79088200	.	G	T	STOP_GAINED	HIGH	NONSENSE	Gaa/Taa	E218*	c.652G>T	Acan	ENSMUST00000032835	5	0.2840
B16F10 ATCC	chr7	79100110	.	G	C	NON_SYNONYMOUS_CODING	MODERATE	MISSENSE	aGt/aCt	S1543T	c.4628G>C	Acan	ENSMUST00000032835	12	0.1818
B16F10 ATCC	chr2	93865948	.	A	C	NON_SYNONYMOUS_CODING	MODERATE	MISSENSE	Ttc/Gtc	F102V	c.304T>G	Accsl	ENSMUST00000099690	2	0.2143
B16F10 ATCC	chr4	49447588	.	T	G	NON_SYNONYMOUS_CODING	MODERATE	MISSENSE	aAg/aCg	K331T	c.992A>C	Acnat1	ENSMUST00000095086	3	0.7717
B16F10 ATCC	chr4	106770700	.	T	C	SPLICE_SITE_REGION+INTRON	LOW				c.377+4A>G	Acot11	ENSMUST00000065253	3	0.1866
B16F10 ATCC	chr12	83992551	.	T	G	NON_SYNONYMOUS_CODING	MODERATE	MISSENSE	cTt/cGt	L278R	c.833T>G	Acot2	ENSMUST00000021649	3	0.2781
B16F10 ATCC	chr2	164799813	.	T	C	NON_SYNONYMOUS_CODING	MODERATE	MISSENSE	cAg/cGg	Q133R	c.398A>G	Acot8	ENSMUST00000103094	3	0.4242
B16F10 ATCC	chr5	35588222	.	A	T	NON_SYNONYMOUS_CODING	MODERATE	MISSENSE	aAg/aTg	K61M	c.182A>T	Acox3	ENSMUST00000114238	2	0.1933
B16F10 ATCC	chr2	127872195	.	A	C	NON_SYNONYMOUS_CODING	MODERATE	MISSENSE	gAc/gCc	D137A	c.410A>C	Acoxl	ENSMUST00000028859	4	0.2261
B16F10 ATCC	chr7	119537211	.	A	T	NON_SYNONYMOUS_CODING	MODERATE	MISSENSE	aAg/aTg	K335M	c.1004A>T	Acsm5	ENSMUST00000066465	8	0.2025
B16F10 ATCC	chr7	28894578	.	A	C	NON_SYNONYMOUS_CODING	MODERATE	MISSENSE	Ttc/Gtc	F835V	c.2503T>G	Actn4	ENSMUST00000068045	20	0.4928
B16F10 ATCC	chr2	48870373	.	T	C	NON_SYNONYMOUS_CODING	MODERATE	MISSENSE	gTt/gCt	V47A	c.140T>C	Acvr2a	ENSMUST00000063886	2	0.2273
B16F10 ATCC	chr2	163728116	.	C	G	SPLICE_SITE_DONOR+INTRON	HIGH				c.975+1G>C	Ada	ENSMUST00000017841	10	0.3939
B16F10 ATCC	chr12	81560686	.	G	A	NON_SYNONYMOUS_CODING	MODERATE	MISSENSE	Cac/Tac	H101Y	c.301C>T	Adam21	ENSMUST00000008582	2	0.1902
B16F10 ATCC	chr8	43569698	.	T	A	NON_SYNONYMOUS_CODING	MODERATE	MISSENSE	Aac/Tac	N252Y	c.754A>T	Adam26a	ENSMUST00000049577	2	0.2474
B16F10 ATCC	chr8	43520597	.	T	C	NON_SYNONYMOUS_CODING	MODERATE	MISSENSE	gAg/gGg	E456G	c.1367A>G	Adam26b	ENSMUST00000080135	2	0.4684
B16F10 ATCC	chr8	24681431	.	C	A	NON_SYNONYMOUS_CODING	MODERATE	MISSENSE	Gtc/Ttc	V795F	c.2383G>T	Adam3	ENSMUST00000033958	20	0.2600
B16F10 ATCC	chr8	24744231	.	AT	A	FRAME_SHIFT	HIGH		aat/	N691fs	c.2072delA	Adam5	ENSMUST00000050300	19	0.2500
B16F10 ATCC	chr10	61218445	.	A	G	NON_SYNONYMOUS_CODING	MODERATE	MISSENSE	Ttc/Ctc	F603L	c.1807T>C	Adamts14	ENSMUST00000120336	12	0.5094
B16F10 ATCC	chr13	70753170	.	T	C	SPLICE_SITE_REGION+INTRON	LOW				c.2783+4A>G	Adamts16	ENSMUST00000080145	18	0.4143
B16F10 ATCC	chr8	113775440	.	T	C	NON_SYNONYMOUS_CODING	MODERATE	MISSENSE	aAg/aGg	K263R	c.788A>G	Adamts18	ENSMUST00000093113	5	0.3607
B16F10 ATCC	chr5	89684449	.	G	A	NON_SYNONYMOUS_CODING	MODERATE	MISSENSE	Cgc/Tgc	R933C	c.2797C>T	Adamts3	ENSMUST00000163159	20	0.4286
B16F10 ATCC	chr6	92849344	.	T	G	NON_SYNONYMOUS_CODING	MODERATE	MISSENSE	aAc/aCc	N1431T	c.4292A>C	Adamts9	ENSMUST00000113438	28	0.1488
B16F10 ATCC	chr3	89735437	.	G	T	NON_SYNONYMOUS_CODING	MODERATE	MISSENSE	caG/caT	Q208H	c.624G>T	Adar	ENSMUST00000107405	2	0.2000
B16F10 ATCC	chr11	7150019	.	G	C	NON_SYNONYMOUS_CODING	MODERATE	MISSENSE	Gca/Cca	A710P	c.2128G>C	Adcy1	ENSMUST00000020706	13	0.4800
B16F10 ATCC	chr14	55780956	.	G	A	NON_SYNONYMOUS_CODING	MODERATE	MISSENSE	gCg/gTg	A178V	c.533C>T	Adcy4	ENSMUST00000002398	5	0.3882
B16F10 ATCC	chr5	34613400	.	T	A	STOP_GAINED	HIGH	NONSENSE	tTg/tAg	L285*	c.854T>A	Add1	ENSMUST00000114340	7	0.3417
B16F10 ATCC	chr6	86085965	.	G	C	NON_SYNONYMOUS_CODING	MODERATE	MISSENSE	cGc/cCc	R35P	c.104G>C	Add2	ENSMUST00000032069	3	0.3636
B16F10 ATCC	chr14	66727496	.	T	G	NON_SYNONYMOUS_CODING	MODERATE	MISSENSE	Ttt/Gtt	F312V	c.934T>G	Adra1a	ENSMUST00000054661	3	0.4167
B16F10 ATCC	chr11	5871460	.	C	T	STOP_GAINED	HIGH	NONSENSE	Cga/Tga	R1000*	c.2998C>T	Aebp1	ENSMUST00000102923	21	0.1705
B16F10 ATCC	chr1	38208035	.	A	C	SPLICE_SITE_REGION+INTRON	LOW				c.2473-5T>G	Aff3	ENSMUST00000095027	12	0.1861
B16F10 ATCC	chr8	123488242	.	A	C	NON_SYNONYMOUS_CODING	MODERATE	MISSENSE	gaA/gaC	E216D	c.648A>C	Afg3l1	ENSMUST00000001520	7	0.5823
B16F10 ATCC	chr5	90505015	.	G	C	NON_SYNONYMOUS_CODING	MODERATE	MISSENSE	gGg/gCg	G448A	c.1343G>C	Afp	ENSMUST00000042755	11	0.3448
B16F10 ATCC	chr10	127088242	.	G	T	NON_SYNONYMOUS_CODING	MODERATE	MISSENSE	aGc/aTc	S775I	c.2324G>T	Agap2	ENSMUST00000039259	12	0.3077
B16F10 ATCC	chr7	76419904	.	T	G	NON_SYNONYMOUS_CODING	MODERATE	MISSENSE	Ttt/Gtt	F143V	c.427T>G	Agbl1	ENSMUST00000107442	5	0.2640
B16F10 ATCC	chr6	40386966	.	G	A	SPLICE_SITE_REGION+INTRON	LOW				c.874+5G>A	Agk	ENSMUST00000031977	12	0.1373
B16F10 ATCC	chr3	107674001	.	A	C	SPLICE_SITE_REGION+INTRON	LOW				c.477+7T>G	Ahcyl1	ENSMUST00000029490	4	0.1826
B16F10 ATCC	chr19	9016082	.	A	T	NON_SYNONYMOUS_CODING	MODERATE	MISSENSE	aAt/aTt	N4910I	c.14729A>T	Ahnak	ENSMUST00000092956	5	0.6196
B16F10 ATCC	chr17	27564241	.	G	A	NON_SYNONYMOUS_CODING	MODERATE	MISSENSE	Cgc/Tgc	R51C	c.151C>T	AI413582	ENSMUST00000154473	4	0.1871
B16F10 ATCC	chr4	41497557	.	A	C	NON_SYNONYMOUS_CODING	MODERATE	MISSENSE	cTt/cGt	L691R	c.2072T>G	AI464131	ENSMUST00000054920	2	0.1600
B16F10 ATCC	chr2	32630271	.	A	T	NON_SYNONYMOUS_CODING	MODERATE	MISSENSE	aAg/aTg	K43M	c.128A>T	Ak1	ENSMUST00000068271	3	0.5000
B16F10 ATCC	chr17	72205807	.	C	G	NON_SYNONYMOUS_CODING	MODERATE	MISSENSE	Ggg/Cgg	G386R	c.1156G>C	Alk	ENSMUST00000086639	4	0.2632
B16F10 ATCC	chr6	85677613	.	A	C	NON_SYNONYMOUS_CODING	MODERATE	MISSENSE	aAg/aCg	K2578T	c.7733A>C	Alms1	ENSMUST00000072018	16	0.1922
B16F10 ATCC	chr12	111275683	.	C	T	NON_SYNONYMOUS_CODING	MODERATE	MISSENSE	gCg/gTg	A368V	c.1103C>T	Amn	ENSMUST00000021707	10	0.2632
B16F10 ATCC	chr9	102723698	.	TC	T	FRAME_SHIFT	HIGH		cca/	P322fs	c.965delC	Amotl2	ENSMUST00000153965	4	0.6316
B16F10 ATCC	chr7	110777825	.	T	G	NON_SYNONYMOUS_CODING	MODERATE	MISSENSE	Ttg/Gtg	L8V	c.22T>G	Ampd3	ENSMUST00000005829	2	0.2035
B16F10 ATCC	chr2	25273368	.	G	T	STOP_GAINED	HIGH	NONSENSE	Gga/Tga	G206*	c.616G>T	Anapc2	ENSMUST00000028341	2	0.4857
B16F10 ATCC	chr1	190937554	.	G	A	NON_SYNONYMOUS_CODING	MODERATE	MISSENSE	Gac/Aac	D166N	c.496G>A	Angel2	ENSMUST00000066632	3	0.2073
B16F10 ATCC	chr4	99034520	.	A	G	NON_SYNONYMOUS_CODING	MODERATE	MISSENSE	aAc/aGc	N266S	c.797A>G	Angptl3	ENSMUST00000030280	4	0.4956
B16F10 ATCC	chr3	127029509	.	A	G	NON_SYNONYMOUS_CODING	MODERATE	MISSENSE	gTg/gCg	V418A	c.1253T>C	Ank2	ENSMUST00000182726	12	0.2657
B16F10 ATCC	chr2	11779818	.	CCTCCGGTACTT	C	FRAME_SHIFT	HIGH		ctccggtacttg/	L153fs	c.457_467delCTCCGGTACTT	Ankrd16	ENSMUST00000056108	2	0.1979
B16F10 ATCC	chr10	81638656	.	G	A	NON_SYNONYMOUS_CODING	MODERATE	MISSENSE	gGc/gAc	G218D	c.653G>A	Ankrd24	ENSMUST00000119336	9	0.4769
B16F10 ATCC	chr3	96685018	.	A	C	NON_SYNONYMOUS_CODING	MODERATE	MISSENSE	gaA/gaC	E873D	c.2619A>C	Ankrd35	ENSMUST00000048427	10	0.1935
B16F10 ATCC	chr1	54658982	.	A	C	NON_SYNONYMOUS_CODING	MODERATE	MISSENSE	cTt/cGt	L809R	c.2426T>G	Ankrd44	ENSMUST00000044359	22	0.4540
B16F10 ATCC	chr6	83763162	.	T	G	NON_SYNONYMOUS_CODING	MODERATE	MISSENSE	Ttg/Gtg	L71V	c.211T>G	Ankrd53	ENSMUST00000014891	2	0.1818
B16F10 ATCC	chr7	120182519	.	G	A	NON_SYNONYMOUS_CODING	MODERATE	MISSENSE	Gat/Aat	D258N	c.772G>A	Anks4b	ENSMUST00000033201	2	0.1913
B16F10 ATCC	chr9	22362801	.	T	C	NON_SYNONYMOUS_CODING	MODERATE	MISSENSE	gAg/gGg	E580G	c.1739A>G	Anln	ENSMUST00000040912	10	0.2033
B16F10 ATCC	chr14	34067971	.	A	T	NON_SYNONYMOUS_CODING	MODERATE	MISSENSE	aAc/aTc	N340I	c.1019A>T	Antxrl	ENSMUST00000058725	12	0.6327
B16F10 ATCC	chr8	62092506	.	C	T	NON_SYNONYMOUS_CODING	MODERATE	MISSENSE	gGc/gAc	G64D	c.191G>A	Anxa10	ENSMUST00000034052	3	0.4581
B16F10 ATCC	chr11	55007851	.	G	C	SPLICE_SITE_REGION+INTRON	LOW				c.489+7C>G	Anxa6	ENSMUST00000108883	7	0.1954
B16F10 ATCC	chr1	58081542	.	G	A	NON_SYNONYMOUS_CODING	MODERATE	MISSENSE	Gtg/Atg	V865M	c.2593G>A	Aox1	ENSMUST00000001027	24	0.3311
B16F10 ATCC	chr1	58312401	.	A	C	SPLICE_SITE_REGION+INTRON	LOW				c.2142+4A>C	Aox2	ENSMUST00000114366	19	0.4348
B16F10 ATCC	chr1	58350268	.	T	C	NON_SYNONYMOUS_CODING	MODERATE	MISSENSE	cTt/cCt	L1142P	c.3425T>C	Aox2	ENSMUST00000114366	30	0.1696
B16F10 ATCC	chr10	80719237	.	T	C	NON_SYNONYMOUS_CODING	MODERATE	MISSENSE	tAc/tGc	Y418C	c.1253A>G	Ap3d1	ENSMUST00000020420	13	0.2444
B16F10 ATCC	chr19	5570424	.	A	C	NON_SYNONYMOUS_CODING	MODERATE	MISSENSE	aAg/aCg	K624T	c.1871A>C	Ap5b1	ENSMUST00000096318	2	0.5000
B16F10 ATCC	chr7	105559136	.	C	T	NON_SYNONYMOUS_CODING	MODERATE	MISSENSE	tGc/tAc	C654Y	c.1961G>A	Apbb1	ENSMUST00000081165	12	0.2381
B16F10 ATCC	chr18	34313167	.	C	T	STOP_GAINED	HIGH	NONSENSE	Cag/Tag	Q1039*	c.3115C>T	Apc	ENSMUST00000079362	16	0.2910
B16F10 ATCC	chr18	62937183	.	T	G	NON_SYNONYMOUS_CODING	MODERATE	MISSENSE	Ttc/Gtc	F174V	c.520T>G	Apcdd1	ENSMUST00000096554	3	0.3810
B16F10 ATCC	chr12	8005074	.	C	A	NON_SYNONYMOUS_CODING	MODERATE	MISSENSE	Ctt/Att	L1358I	c.4072C>A	Apob	ENSMUST00000037811	25	0.1453
B16F10 ATCC	chr6	122581431	.	G	A	NON_SYNONYMOUS_CODING	MODERATE	MISSENSE	Cac/Tac	H122Y	c.364C>T	Apobec1	ENSMUST00000112585	6	0.1890
B16F10 ATCC	chr7	126585031	.	G	A	NON_SYNONYMOUS_CODING	MODERATE	MISSENSE	cGt/cAt	R7H	c.20G>A	Apobr	ENSMUST00000039522	1	0.2927
B16F10 ATCC	chr6	134984186	.	C	G	STOP_GAINED	HIGH	NONSENSE	tCa/tGa	S201*	c.602C>G	Apold1	ENSMUST00000167323	2	0.1944
B16F10 ATCC	chr16	85080009	.	A	C	NON_SYNONYMOUS_CODING	MODERATE	MISSENSE	Ttg/Gtg	L165V	c.493T>G	App	ENSMUST00000005406	5	0.2632
B16F10 ATCC	chr2	114108098	.	A	T	SPLICE_SITE_REGION+INTRON	LOW				c.3866+6T>A	Aqr	ENSMUST00000043160	32	0.2254
B16F10 ATCC	chr2	166893595	.	A	T	NON_SYNONYMOUS_CODING	MODERATE	MISSENSE	Acc/Tcc	T1727S	c.5179A>T	Arfgef2	ENSMUST00000099078	38	0.2679
B16F10 ATCC	chr7	105637242	.	G	C	NON_SYNONYMOUS_CODING	MODERATE	MISSENSE	Ctg/Gtg	L192V	c.574C>G	Arfip2	ENSMUST00000084782	6	0.2700
B16F10 ATCC	chr2	113842894	.	A	G	NON_SYNONYMOUS_CODING	MODERATE	MISSENSE	Tgt/Cgt	C115R	c.343T>C	Arhgap11a	ENSMUST00000102545	4	0.2830
B16F10 ATCC	chr2	43890427	.	G	T	SPLICE_SITE_ACCEPTOR+INTRON	HIGH				c.409-1G>T	Arhgap15	ENSMUST00000055776	5	0.1729
B16F10 ATCC	chr10	26850004	.	A	T	NON_SYNONYMOUS_CODING	MODERATE	MISSENSE	cAg/cTg	Q147L	c.440A>T	Arhgap18	ENSMUST00000039557	3	0.4567
B16F10 ATCC	chr18	39357671	.	G	C	NON_SYNONYMOUS_CODING	MODERATE	MISSENSE	Gca/Cca	A703P	c.2107G>C	Arhgap26	ENSMUST00000097593	21	0.3600
B16F10 ATCC	chr17	67861277	.	G	A	NON_SYNONYMOUS_CODING	MODERATE	MISSENSE	gCg/gTg	A515V	c.1544C>T	Arhgap28	ENSMUST00000024840	12	0.2911
B16F10 ATCC	chr6	136933618	.	C	A	NON_SYNONYMOUS_CODING	MODERATE	MISSENSE	aaG/aaT	K48N	c.144G>T	Arhgdib	ENSMUST00000032344	2	0.1053
B16F10 ATCC	chr8	14964191	.	C	G	NON_SYNONYMOUS_CODING	MODERATE	MISSENSE	gCc/gGc	A692G	c.2075C>G	Arhgef10	ENSMUST00000084207	18	0.2889
B16F10 ATCC	chr8	3439628	.	C	T	NON_SYNONYMOUS_CODING	MODERATE	MISSENSE	tCt/tTt	S320F	c.959C>T	Arhgef18	ENSMUST00000004684	8	0.3600
B16F10 ATCC	chr13	97945691	.	G	A	NON_SYNONYMOUS_CODING	MODERATE	MISSENSE	Cgg/Tgg	R1203W	c.3607C>T	Arhgef28	ENSMUST00000109426	28	0.2358
B16F10 ATCC	chr2	15075021	.	G	A	NON_SYNONYMOUS_CODING	MODERATE	MISSENSE	atG/atA	M134I	c.402G>A	Arl5b	ENSMUST00000069870	5	0.2649
B16F10 ATCC	chr3	19149507	.	C	A	NON_SYNONYMOUS_CODING	MODERATE	MISSENSE	aGc/aTc	S85I	c.254G>T	Armc1	ENSMUST00000029125	3	0.2470
B16F10 ATCC	chr17	28532059	.	A	G	NON_SYNONYMOUS_CODING	MODERATE	MISSENSE	gAg/gGg	E83G	c.248A>G	Armc12	ENSMUST00000025060	2	0.1897
B16F10 ATCC	chr18	7266919	.	G	A	NON_SYNONYMOUS_CODING	MODERATE	MISSENSE	tCg/tTg	S394L	c.1181C>T	Armc4	ENSMUST00000081275	10	0.3036
B16F10 ATCC	chr3	126439132	.	G	T	NON_SYNONYMOUS_CODING	MODERATE	MISSENSE	aGg/aTg	R509M	c.1526G>T	Arsj	ENSMUST00000093976	2	0.2079
B16F10 ATCC	chr14	26903348	.	A	G	NON_SYNONYMOUS_CODING	MODERATE	MISSENSE	aAg/aGg	K220R	c.659A>G	Asb14	ENSMUST00000090337	6	0.3626
B16F10 ATCC	chr11	4646656	.	C	G	NON_SYNONYMOUS_CODING	MODERATE	MISSENSE	gCc/gGc	A59G	c.176C>G	Ascc2	ENSMUST00000070257	3	0.5952
B16F10 ATCC	chr8	83969152	.	G	C	NON_SYNONYMOUS_CODING	MODERATE	MISSENSE	Gcc/Ccc	A141P	c.421G>C	Asf1b	ENSMUST00000005607	4	0.2745
B16F10 ATCC	chr3	88982709	.	C	A	NON_SYNONYMOUS_CODING	MODERATE	MISSENSE	Cta/Ata	L632I	c.1894C>A	Ash1l	ENSMUST00000090933	2	0.3824
B16F10 ATCC	chr1	158472497	.	C	A	NON_SYNONYMOUS_CODING	MODERATE	MISSENSE	Cca/Aca	P136T	c.406C>A	Astn1	ENSMUST00000193042	2	0.1846
B16F10 ATCC	chr1	158597206	.	G	A	NON_SYNONYMOUS_CODING	MODERATE	MISSENSE	cGc/cAc	R654H	c.1961G>A	Astn1	ENSMUST00000193042	12	0.1964
B16F10 ATCC	chr1	158684096	.	C	A	STOP_GAINED	HIGH	NONSENSE	taC/taA	Y1169*	c.3507C>A	Astn1	ENSMUST00000193042	22	0.2412
B16F10 ATCC	chr18	22516772	.	A	C	NON_SYNONYMOUS_CODING	MODERATE	MISSENSE	aAg/aCg	K606T	c.1817A>C	Asxl3	ENSMUST00000097655	12	0.4714
B16F10 ATCC	chr15	102547182	.	C	G	NON_SYNONYMOUS_CODING	MODERATE	MISSENSE	gGc/gCc	G249A	c.746G>C	Atf7	ENSMUST00000184485	8	0.7566
B16F10 ATCC	chr14	47568292	.	C	G	NON_SYNONYMOUS_CODING	MODERATE	MISSENSE	Gct/Cct	A39P	c.115G>C	Atg14	ENSMUST00000042988	1	0.4000
B16F10 ATCC	chr6	114695686	.	T	A	NON_SYNONYMOUS_CODING	MODERATE	MISSENSE	Ttt/Att	F287I	c.859T>A	Atg7	ENSMUST00000169310	9	0.3102
B16F10 ATCC	chr9	53531687	.	T	G	NON_SYNONYMOUS_CODING	MODERATE	MISSENSE	aAg/aCg	K92T	c.275A>C	Atm	ENSMUST00000118282	4	0.1600
B16F10 ATCC	chr8	12834637	.	G	C	NON_SYNONYMOUS_CODING+SPLICE_SITE_REGION	MODERATE	MISSENSE	agG/agC	R522S	c.1566G>C	Atp11a	ENSMUST00000091237	15	0.1964
B16F10 ATCC	chr3	35812213	.	G	T	NON_SYNONYMOUS_CODING+SPLICE_SITE_REGION	MODERATE	MISSENSE	gGt/gTt	G587V	c.1760G>T	Atp11b	ENSMUST00000029257	17	0.2950
B16F10 ATCC	chr14	56386141	.	G	A	NON_SYNONYMOUS_CODING	MODERATE	MISSENSE	Gtc/Atc	V879I	c.2635G>A	Atp12a	ENSMUST00000007340	19	0.3103
B16F10 ATCC	chr16	29282062	.	T	G	NON_SYNONYMOUS_CODING	MODERATE	MISSENSE	aaA/aaC	K681N	c.2043A>C	Atp13a5	ENSMUST00000075806	18	0.1497
B16F10 ATCC	chr6	113842306	.	A	C	NON_SYNONYMOUS_CODING	MODERATE	MISSENSE	Ttt/Gtt	F9V	c.25T>G	Atp2b2	ENSMUST00000101044	3	0.2202
B16F10 ATCC	chr1	133735189	.	C	A	NON_SYNONYMOUS_CODING	MODERATE	MISSENSE	Gcc/Tcc	A321S	c.961G>T	Atp2b4	ENSMUST00000143567	8	0.1646
B16F10 ATCC	chr1	5098048	.	A	C	NON_SYNONYMOUS_CODING	MODERATE	MISSENSE	aAg/aCg	K147T	c.440A>C	Atp6v1h	ENSMUST00000044369	6	0.2490
B16F10 ATCC	chr14	60027970	.	T	G	NON_SYNONYMOUS_CODING	MODERATE	MISSENSE	Agt/Cgt	S306R	c.916A>C	Atp8a2	ENSMUST00000080368	10	0.2667
B16F10 ATCC	chr18	64541505	.	G	A	SPLICE_SITE_REGION+INTRON	LOW				c.2708-4C>T	Atp8b1	ENSMUST00000025482	22	0.4444
B16F10 ATCC	chr3	89954568	.	T	C	NON_SYNONYMOUS_CODING	MODERATE	MISSENSE	aAg/aGg	K207R	c.620A>G	Atp8b2	ENSMUST00000107396	10	0.4663
B16F10 ATCC	chrX	93969076	.	G	A	NON_SYNONYMOUS_CODING	MODERATE	MISSENSE	Gac/Aac	D117N	c.349G>A	AU015836	ENSMUST00000163458	1	0.4583
B16F10 ATCC	chr10	122449577	.	G	C	NON_SYNONYMOUS_CODING	MODERATE	MISSENSE	aGc/aCc	S258T	c.773G>C	Avpr1a	ENSMUST00000020323	1	0.2941
B16F10 ATCC	chr9	39590603	.	C	A	STOP_GAINED+SPLICE_SITE_REGION	HIGH	NONSENSE	Gag/Tag	E736*	c.2206G>T	AW551984	ENSMUST00000042485	18	0.4906
B16F10 ATCC	chr4	155991934	.	C	A	NON_SYNONYMOUS_CODING	MODERATE	MISSENSE	cGc/cTc	R228L	c.683G>T	B3galt6	ENSMUST00000052185	1	0.6000
B16F10 ATCC	chr7	25628150	.	C	T	NON_SYNONYMOUS_CODING	MODERATE	MISSENSE	Cgt/Tgt	R2C	c.4C>T	B3gnt8	ENSMUST00000076034	2	0.1667
B16F10 ATCC	chr15	74540898	.	C	T	NON_SYNONYMOUS_CODING	MODERATE	MISSENSE	Cgg/Tgg	R490W	c.1468C>T	Bai1	ENSMUST00000042035	7	0.3571
B16F10 ATCC	chr1	25131271	.	C	T	NON_SYNONYMOUS_CODING	MODERATE	MISSENSE	cGc/cAc	R982H	c.2945G>A	Bai3	ENSMUST00000041838	19	0.2090
B16F10 ATCC	chr17	25246005	.	A	C	NON_SYNONYMOUS_CODING	MODERATE	MISSENSE	Ttc/Gtc	F742V	c.2224T>G	Baiap3	ENSMUST00000182056	24	0.3158
B16F10 ATCC	chr9	31846866	.	G	A	NON_SYNONYMOUS_CODING	MODERATE	MISSENSE	Ccc/Tcc	P259S	c.775C>T	Barx2	ENSMUST00000116615	4	0.2500
B16F10 ATCC	chr2	59960015	.	T	A	NON_SYNONYMOUS_CODING	MODERATE	MISSENSE	gAg/gTg	E618V	c.1853A>T	Baz2b	ENSMUST00000090925	8	0.2708
B16F10 ATCC	chr16	45653948	.	C	T	NON_SYNONYMOUS_CODING	MODERATE	MISSENSE	Gac/Aac	D32N	c.94G>A	BC016579	ENSMUST00000036732	1	0.2903
B16F10 ATCC	chr1	157465789	.	G	T	NON_SYNONYMOUS_CODING	MODERATE	MISSENSE	ttG/ttT	L153F	c.459G>T	BC026585	ENSMUST00000046743	6	0.2553
B16F10 ATCC	chr7	109717946	.	T	C	NON_SYNONYMOUS_CODING	MODERATE	MISSENSE	Aag/Gag	K180E	c.538A>G	BC051019	ENSMUST00000033334	4	0.2558
B16F10 ATCC	chr5	87964213	.	C	A	NON_SYNONYMOUS_CODING	MODERATE	MISSENSE	aCa/aAa	T243K	c.728C>A	BC051076	ENSMUST00000069773	1	0.2500
B16F10 ATCC	chr17	34460056	.	T	G	NON_SYNONYMOUS_CODING	MODERATE	MISSENSE	caT/caG	H264Q	c.792T>G	BC051142	ENSMUST00000097348	20	0.4462
B16F10 ATCC	chr13	60784643	.	T	G	NON_SYNONYMOUS_CODING	MODERATE	MISSENSE	gAg/gCg	E76A	c.227A>C	BC051665	ENSMUST00000026078	3	0.3730
B16F10 ATCC	chr12	4850825	.	A	C	NON_SYNONYMOUS_CODING	MODERATE	MISSENSE	aAg/aCg	K227T	c.680A>C	BC068281	ENSMUST00000085793	1	0.5917
B16F10 ATCC	chr7	28290668	.	G	A	NON_SYNONYMOUS_CODING	MODERATE	MISSENSE	aCa/aTa	T137I	c.410C>T	BC089491	ENSMUST00000056589	1	0.1429
B16F10 ATCC	chr3	97210641	.	G	T	NON_SYNONYMOUS_CODING	MODERATE	MISSENSE	Cag/Aag	Q246K	c.736C>A	Bcl9	ENSMUST00000046521	8	0.2203
B16F10 ATCC	chr10	117024170	.	C	T	NON_SYNONYMOUS_CODING	MODERATE	MISSENSE	tCg/tTg	S445L	c.1334C>T	Best3	ENSMUST00000020378	10	0.3714
B16F10 ATCC	chr16	13697460	.	C	T	NON_SYNONYMOUS_CODING	MODERATE	MISSENSE	cCt/cTt	P304L	c.911C>T	Bfar	ENSMUST00000023365	6	0.2985
B16F10 ATCC	chr9	103453056	.	C	G	SPLICE_SITE_REGION+INTRON	LOW				c.575+6G>C	Bfsp2	ENSMUST00000124310	2	0.1597
B16F10 ATCC	chr17	74611542	.	A	C	NON_SYNONYMOUS_CODING	MODERATE	MISSENSE	gaA/gaC	E1936D	c.5808A>C	Birc6	ENSMUST00000182597	27	0.2692
B16F10 ATCC	chr5	41808764	.	C	G	NON_SYNONYMOUS_CODING+SPLICE_SITE_REGION	MODERATE	MISSENSE	Gtt/Ctt	V2653L	c.7957G>C	Bod1l	ENSMUST00000050556	14	0.2143
B16F10 ATCC	chr5	41821146	.	C	T	NON_SYNONYMOUS_CODING	MODERATE	MISSENSE	Gaa/Aaa	E942K	c.2824G>A	Bod1l	ENSMUST00000050556	10	0.1818
B16F10 ATCC	chr1	93694052	.	C	T	SPLICE_SITE_REGION+INTRON	LOW				c.353-8C>T	Bok	ENSMUST00000027499	3	0.2391
B16F10 ATCC	chr11	107074582	.	A	C	NON_SYNONYMOUS_CODING	MODERATE	MISSENSE	gTg/gGg	V1262G	c.3785T>G	Bptf	ENSMUST00000106763	13	0.1824
B16F10 ATCC	chr6	39662026	.	A	G	NON_SYNONYMOUS_CODING	MODERATE	MISSENSE	Tgt/Cgt	C264R	c.790T>C	Braf	ENSMUST00000002487	7	0.3036
B16F10 ATCC	chr5	150542763	.	A	T	NON_SYNONYMOUS_CODING	MODERATE	MISSENSE	aaA/aaT	K1997N	c.5991A>T	Brca2	ENSMUST00000044620	11	0.2486
B16F10 ATCC	chr8	27123991	.	T	G	NON_SYNONYMOUS_CODING	MODERATE	MISSENSE	gAa/gCa	E389A	c.1166A>C	Brf2	ENSMUST00000033877	4	0.2301
B16F10 ATCC	chr1	158246989	.	G	A	STOP_GAINED	HIGH	NONSENSE	Cga/Tga	R521*	c.1561C>T	Brinp2	ENSMUST00000004133	8	0.1882
B16F10 ATCC	chr7	4707372	.	C	T	NON_SYNONYMOUS_CODING	MODERATE	MISSENSE	aCg/aTg	T535M	c.1604C>T	Brsk1	ENSMUST00000048248	14	0.2857
B16F10 ATCC	chrX	108774860	.	A	T	NON_SYNONYMOUS_CODING	MODERATE	MISSENSE	gTg/gAg	V732E	c.2195T>A	Brwd3	ENSMUST00000150434	19	0.1987
B16F10 ATCC	chr19	36986618	.	T	A	NON_SYNONYMOUS_CODING	MODERATE	MISSENSE	gTt/gAt	V863D	c.2588T>A	Btaf1	ENSMUST00000099494	20	0.1905
B16F10 ATCC	chr1	58397793	.	T	C	NON_SYNONYMOUS_CODING	MODERATE	MISSENSE	cTt/cCt	L93P	c.278T>C	Bzw1	ENSMUST00000186949	3	0.1243
B16F10 ATCC	chr1	85248321	.	C	CT	FRAME_SHIFT	HIGH		aag/aaAg	P219fs	c.653dupA	C130026I21Rik	ENSMUST00000093506	7	0.1340
B16F10 ATCC	chr6	124580492	.	G	T	NON_SYNONYMOUS_CODING	MODERATE	MISSENSE	caG/caT	Q529H	c.1587G>T	C1rb	ENSMUST00000184647	11	0.1187
B16F10 ATCC	chr6	124508742	.	C	A	NON_SYNONYMOUS_CODING	MODERATE	MISSENSE	gaC/gaA	D357E	c.1071C>A	C1rl	ENSMUST00000049124	6	0.1077
B16F10 ATCC	chr6	124530982	.	T	A	STOP_GAINED	HIGH	NONSENSE	Aaa/Taa	K683*	c.2047A>T	C1s1	ENSMUST00000160505	12	0.2063
B16F10 ATCC	chr17	57220209	.	G	T	SPLICE_SITE_REGION+INTRON	LOW				c.2246-7C>A	C3	ENSMUST00000024988	17	0.1778
B16F10 ATCC	chr4	129222298	.	C	T	NON_SYNONYMOUS_CODING	MODERATE	MISSENSE	Gct/Act	A903T	c.2707G>A	C77080	ENSMUST00000052602	6	0.2093
B16F10 ATCC	chr2	24661844	.	T	A	NON_SYNONYMOUS_CODING	MODERATE	MISSENSE	aAg/aTg	K1098M	c.3293A>T	Cacna1b	ENSMUST00000100348	21	0.1275
B16F10 ATCC	chr2	24733945	.	T	A	NON_SYNONYMOUS_CODING+SPLICE_SITE_REGION	MODERATE	MISSENSE	Agc/Tgc	S208C	c.622A>T	Cacna1b	ENSMUST00000100348	4	0.5895
B16F10 ATCC	chr6	118613344	.	G	C	NON_SYNONYMOUS_CODING	MODERATE	MISSENSE	atC/atG	I1558M	c.4674C>G	Cacna1c	ENSMUST00000112793	37	0.1835
B16F10 ATCC	chrX	7610251	.	C	G	NON_SYNONYMOUS_CODING	MODERATE	MISSENSE	Ctc/Gtc	L144V	c.430C>G	Cacna1f	ENSMUST00000115726	4	1.0000
B16F10 ATCC	chr5	16194763	.	A	C	NON_SYNONYMOUS_CODING	MODERATE	MISSENSE	gaA/gaC	E121D	c.363A>C	Cacna2d1	ENSMUST00000039370	5	0.2116
B16F10 ATCC	chr14	29064308	.	G	T	NON_SYNONYMOUS_CODING	MODERATE	MISSENSE	gCc/gAc	A574D	c.1721C>A	Cacna2d3	ENSMUST00000022567	19	0.3250
B16F10 ATCC	chr1	173345903	.	G	A	SPLICE_SITE_REGION+INTRON	LOW				c.326-6C>T	Cadm3	ENSMUST00000005470	3	0.1522
B16F10 ATCC	chr14	12467113	.	C	A	NON_SYNONYMOUS_CODING	MODERATE	MISSENSE	Gac/Tac	D940Y	c.2818G>T	Cadps	ENSMUST00000067491	19	0.4868
B16F10 ATCC	chr6	23382996	.	C	T	NON_SYNONYMOUS_CODING	MODERATE	MISSENSE	atG/atA	M788I	c.2364G>A	Cadps2	ENSMUST00000018122	16	0.1461
B16F10 ATCC	chr1	136282834	.	C	T	NON_SYNONYMOUS_CODING	MODERATE	MISSENSE	Gga/Aga	G417R	c.1249G>A	Camsap2	ENSMUST00000048309	12	0.2407
B16F10 ATCC	chr17	25963347	.	C	T	NON_SYNONYMOUS_CODING	MODERATE	MISSENSE	Gaa/Aaa	E530K	c.1588G>A	Capn15	ENSMUST00000041641	3	0.2105
B16F10 ATCC	chr11	93100290	.	C	G	SPLICE_SITE_REGION+INTRON	LOW				c.61+4C>G	Car10	ENSMUST00000042943	2	0.1727
B16F10 ATCC	chr7	45701229	.	C	T	NON_SYNONYMOUS_CODING	MODERATE	MISSENSE	Ccc/Tcc	P50S	c.148C>T	Car11	ENSMUST00000003360	3	0.2069
B16F10 ATCC	chr9	5354582	.	C	T	NON_SYNONYMOUS_CODING	MODERATE	MISSENSE	gCt/gTt	A317V	c.950C>T	Casp12	ENSMUST00000027009	8	0.2099
B16F10 ATCC	chr4	141805461	.	T	G	NON_SYNONYMOUS_CODING	MODERATE	MISSENSE	Ttg/Gtg	L223V	c.667T>G	Casp9	ENSMUST00000030747	4	0.6364
B16F10 ATCC	chr4	148944359	.	T	C	NON_SYNONYMOUS_CODING	MODERATE	MISSENSE	cTg/cCg	L1087P	c.3260T>C	Casz1	ENSMUST00000122222	16	1.0000
B16F10 ATCC	chr13	55808104	.	T	G	NON_SYNONYMOUS_CODING	MODERATE	MISSENSE	Ttc/Gtc	F341V	c.1021T>G	Catsper3	ENSMUST00000021961	7	0.2703
B16F10 ATCC	chr16	17147171	.	C	A	START_GAINED	LOW				c.-392G>T	Ccdc116	ENSMUST00000023452	1	0.4545
B16F10 ATCC	chr8	84258909	.	G	A	STOP_GAINED	HIGH	NONSENSE	Cga/Tga	R244*	c.730C>T	Ccdc130	ENSMUST00000098578	10	0.2500
B16F10 ATCC	chr16	34690804	.	G	A	NON_SYNONYMOUS_CODING	MODERATE	MISSENSE	atG/atA	M49I	c.147G>A	Ccdc14	ENSMUST00000023532	1	0.5781
B16F10 ATCC	chr2	77128272	.	T	G	NON_SYNONYMOUS_CODING	MODERATE	MISSENSE	gaA/gaC	E161D	c.483A>C	Ccdc141	ENSMUST00000164114	4	0.2339
B16F10 ATCC	chr12	72128379	.	G	T	NON_SYNONYMOUS_CODING	MODERATE	MISSENSE	Cat/Aat	H507N	c.1519C>A	Ccdc175	ENSMUST00000021494	13	0.1574
B16F10 ATCC	chr4	117871063	.	C	T	SPLICE_SITE_DONOR+INTRON	HIGH				c.482+1G>A	Ccdc24	ENSMUST00000171052	4	0.3077
B16F10 ATCC	chr7	90244046	.	T	C	NON_SYNONYMOUS_CODING	MODERATE	MISSENSE	Aaa/Gaa	K168E	c.502A>G	Ccdc83	ENSMUST00000107221	5	0.2299
B16F10 ATCC	chr11	28388951	.	TA	T	SPLICE_SITE_REGION+INTRON	LOW				c.1549-4delT	Ccdc85a	ENSMUST00000146385	5	0.2128
B16F10 ATCC	chr19	4840722	.	A	G	NON_SYNONYMOUS_CODING	MODERATE	MISSENSE	aAg/aGg	K414R	c.1241A>G	Ccdc87	ENSMUST00000088653	1	0.4590
B16F10 ATCC	chr11	82057891	.	A	G	START_GAINED	LOW				c.-76A>G	Ccl11	ENSMUST00000000342	1	0.1818
B16F10 ATCC	chr9	123977850	.	T	G	NON_SYNONYMOUS_CODING	MODERATE	MISSENSE	Att/Ctt	I187L	c.559A>C	Ccr1l1	ENSMUST00000071404	1	0.7857
B16F10 ATCC	chr8	3747017	.	G	T	NON_SYNONYMOUS_CODING	MODERATE	MISSENSE	tCc/tAc	S107Y	c.320C>A	Cd209a	ENSMUST00000012847	5	0.3333
B16F10 ATCC	chr17	42807993	.	G	A	NON_SYNONYMOUS_CODING	MODERATE	MISSENSE	aCc/aTc	T518I	c.1553C>T	Cd2ap	ENSMUST00000024709	15	0.2628
B16F10 ATCC	chr11	114926034	.	A	C	NON_SYNONYMOUS_CODING	MODERATE	MISSENSE	Ttg/Gtg	L151V	c.451T>G	Cd300lb	ENSMUST00000106581	3	0.2429
B16F10 ATCC	chr11	114926034	.	A	C	NON_SYNONYMOUS_CODING	MODERATE	MISSENSE	Ttg/Gtg	L197V	c.589T>G	Cd300lb	ENSMUST00000074300	3	0.2429
B16F10 ATCC	chr11	114987295	.	T	C	SPLICE_SITE_REGION+INTRON	LOW				c.382+8A>G	Cd300ld	ENSMUST00000045075	2	0.2402
B16F10 ATCC	chr5	17795575	.	T	A	SPLICE_SITE_REGION+INTRON	LOW				c.1125+4A>T	Cd36	ENSMUST00000082367	11	0.3036
B16F10 ATCC	chr2	165063040	.	A	T	NON_SYNONYMOUS_CODING	MODERATE	MISSENSE	aAg/aTg	K92M	c.275A>T	Cd40	ENSMUST00000017799	4	0.2340
B16F10 ATCC	chr1	171695727	.	A	T	NON_SYNONYMOUS_CODING	MODERATE	MISSENSE	gAc/gTc	D46V	c.137A>T	Cd48	ENSMUST00000068584	2	0.2500
B16F10 ATCC	chr1	130452479	.	T	G	NON_SYNONYMOUS_CODING	MODERATE	MISSENSE	gAc/gCc	D254A	c.761A>C	Cd55	ENSMUST00000027650	6	0.4308
B16F10 ATCC	chr2	104081003	.	G	C	NON_SYNONYMOUS_CODING	MODERATE	MISSENSE	aGc/aCc	S23T	c.68G>C	Cd59b	ENSMUST00000090429	3	0.1843
B16F10 ATCC	chr6	71373686	.	T	C	NON_SYNONYMOUS_CODING	MODERATE	MISSENSE	cTt/cCt	L45P	c.134T>C	Cd8a	ENSMUST00000066747	1	0.3900
B16F10 ATCC	chr2	148442364	.	T	A	NON_SYNONYMOUS_CODING	MODERATE	MISSENSE	gAt/gTt	D354V	c.1061A>T	Cd93	ENSMUST00000099269	1	0.2297
B16F10 ATCC	chrX	71441088	.	G	T	NON_SYNONYMOUS_CODING	MODERATE	MISSENSE	cCa/cAa	P86Q	c.257C>A	Cd99l2	ENSMUST00000037391	4	0.5649
B16F10 ATCC	chrX	71441146	.	C	T	SPLICE_SITE_ACCEPTOR+INTRON	HIGH				c.200-1G>A	Cd99l2	ENSMUST00000037391	3	0.5732
B16F10 ATCC	chr2	120730336	.	T	C	NON_SYNONYMOUS_CODING	MODERATE	MISSENSE	Agt/Ggt	S251G	c.751A>G	Cdan1	ENSMUST00000110701	3	0.1750
B16F10 ATCC	chr14	67700298	.	G	C	NON_SYNONYMOUS_CODING	MODERATE	MISSENSE	aCc/aGc	T302S	c.905C>G	Cdca2	ENSMUST00000150006	8	0.3818
B16F10 ATCC	chr12	117872411	.	A	G	NON_SYNONYMOUS_CODING	MODERATE	MISSENSE	Atg/Gtg	M207V	c.619A>G	Cdca7l	ENSMUST00000021592	4	0.3253
B16F10 ATCC	chr8	102679612	.	C	A	NON_SYNONYMOUS_CODING+SPLICE_SITE_REGION	MODERATE	MISSENSE	agG/agT	R76S	c.228G>T	Cdh11	ENSMUST00000075190	3	0.2286
B16F10 ATCC	chr10	60413644	.	T	C	NON_SYNONYMOUS_CODING	MODERATE	MISSENSE	Acc/Gcc	T829A	c.2485A>G	Cdh23	ENSMUST00000105461	24	0.5385
B16F10 ATCC	chr1	110085123	.	C	G	NON_SYNONYMOUS_CODING	MODERATE	MISSENSE	atC/atG	I395M	c.1185C>G	Cdh7	ENSMUST00000027542	6	0.2745
B16F10 ATCC	chr8	99279502	.	G	T	NON_SYNONYMOUS_CODING	MODERATE	MISSENSE	tCt/tAt	S151Y	c.452C>A	Cdh8	ENSMUST00000128860	3	0.1799
B16F10 ATCC	chr4	155641564	.	G	T	NON_SYNONYMOUS_CODING	MODERATE	MISSENSE	gaG/gaT	E377D	c.1131G>T	Cdk11b	ENSMUST00000067081	11	0.7564
B16F10 ATCC	chr13	29777236	.	G	C	NON_SYNONYMOUS_CODING	MODERATE	MISSENSE	Cac/Gac	H117D	c.349C>G	Cdkal1	ENSMUST00000006353	5	0.5955
B16F10 ATCC	chr11	52032396	.	C	T	NON_SYNONYMOUS_CODING	MODERATE	MISSENSE	aCa/aTa	T500I	c.1499C>T	Cdkl3	ENSMUST00000109080	11	0.1975
B16F10 ATCC	chrX	61184104	.	T	G	NON_SYNONYMOUS_CODING	MODERATE	MISSENSE	gaA/gaC	E485D	c.1455A>C	Cdr1	ENSMUST00000166381	1	0.4661
B16F10 ATCC	chr6	120731394	.	G	A	NON_SYNONYMOUS_CODING	MODERATE	MISSENSE	cGc/cAc	R119H	c.356G>A	Cecr2	ENSMUST00000100993	3	0.1542
B16F10 ATCC	chr18	25496249	.	G	C	NON_SYNONYMOUS_CODING	MODERATE	MISSENSE	Cca/Gca	P406A	c.1216C>G	Celf4	ENSMUST00000115816	10	0.3171
B16F10 ATCC	chr3	108414117	.	T	A	NON_SYNONYMOUS_CODING	MODERATE	MISSENSE	Agc/Tgc	S460C	c.1378A>T	Celsr2	ENSMUST00000090558	1	0.2184
B16F10 ATCC	chr1	189652931	.	A	C	NON_SYNONYMOUS_CODING	MODERATE	MISSENSE	cTt/cGt	L2384R	c.7151T>G	Cenpf	ENSMUST00000171929	13	0.2139
B16F10 ATCC	chr13	49647658	.	T	C	SPLICE_SITE_REGION+INTRON	LOW				c.287-4A>G	Cenpp	ENSMUST00000021818	2	0.3953
B16F10 ATCC	chr8	93025607	.	T	G	NON_SYNONYMOUS_CODING	MODERATE	MISSENSE	aAg/aCg	K374T	c.1121A>C	Ces1a	ENSMUST00000095211	10	0.2079
B16F10 ATCC	chr8	93064966	.	T	C	NON_SYNONYMOUS_CODING	MODERATE	MISSENSE	gAg/gGg	E335G	c.1004A>G	Ces1b	ENSMUST00000109582	9	0.6313
B16F10 ATCC	chr8	93175108	.	T	C	NON_SYNONYMOUS_CODING	MODERATE	MISSENSE	aAg/aGg	K411R	c.1232A>G	Ces1d	ENSMUST00000034172	11	0.3941
B16F10 ATCC	chr8	93210418	.	T	C	NON_SYNONYMOUS_CODING	MODERATE	MISSENSE	Aca/Gca	T343A	c.1027A>G	Ces1e	ENSMUST00000034173	9	0.1967
B16F10 ATCC	chr8	104931347	.	A	C	NON_SYNONYMOUS_CODING	MODERATE	MISSENSE	aAa/aCa	K359T	c.1076A>C	Ces2e	ENSMUST00000034355	8	0.2617
B16F10 ATCC	chr8	104932398	.	A	G	SPLICE_SITE_ACCEPTOR+INTRON	HIGH				c.1283-2A>G	Ces2e	ENSMUST00000034355	9	0.2249
B16F10 ATCC	chr16	44401466	.	G	T	NON_SYNONYMOUS_CODING	MODERATE	MISSENSE	aGa/aTa	R14I	c.41G>T	Cfap44	ENSMUST00000099742	2	0.2560
B16F10 ATCC	chr4	118581882	.	C	T	NON_SYNONYMOUS_CODING	MODERATE	MISSENSE	Gat/Aat	D816N	c.2446G>A	Cfap57	ENSMUST00000071972	15	0.5938
B16F10 ATCC	chr2	146129227	.	C	T	NON_SYNONYMOUS_CODING	MODERATE	MISSENSE	cCt/cTt	P919L	c.2756C>T	Cfap61	ENSMUST00000133433	22	0.2424
B16F10 ATCC	chr1	140108904	.	A	G	NON_SYNONYMOUS_CODING	MODERATE	MISSENSE	cTt/cCt	L654P	c.1961T>C	Cfh	ENSMUST00000111976	13	0.3252
B16F10 ATCC	chr1	140147718	.	G	A	NON_SYNONYMOUS_CODING	MODERATE	MISSENSE	Ccc/Tcc	P261S	c.781C>T	Cfh	ENSMUST00000111976	6	0.2687
B16F10 ATCC	chr2	160966488	.	T	C	NON_SYNONYMOUS_CODING	MODERATE	MISSENSE	gAc/gGc	D1602G	c.4805A>G	Chd6	ENSMUST00000039782	31	0.2293
B16F10 ATCC	chr1	134189500	.	A	G	NON_SYNONYMOUS_CODING	MODERATE	MISSENSE	aAg/aGg	K353R	c.1058A>G	Chil1	ENSMUST00000082060	10	0.1964
B16F10 ATCC	chr3	106203822	.	T	C	NON_SYNONYMOUS_CODING	MODERATE	MISSENSE	gAc/gGc	D252G	c.755A>G	Chil4	ENSMUST00000082219	8	0.1429
B16F10 ATCC	chr9	18309859	.	G	GA	FRAME_SHIFT	HIGH		act/aAct	T199fs	c.595dupA	Chordc1	ENSMUST00000001825	8	0.2077
B16F10 ATCC	chr16	20741255	.	T	C	NON_SYNONYMOUS_CODING	MODERATE	MISSENSE	Ttt/Ctt	F869L	c.2605T>C	Chrd	ENSMUST00000007171	21	0.4106
B16F10 ATCC	chr6	36523943	.	A	C	NON_SYNONYMOUS_CODING	MODERATE	MISSENSE	aAc/aCc	N245T	c.734A>C	Chrm2	ENSMUST00000172278	3	0.1184
B16F10 ATCC	chr18	59176173	.	C	T	NON_SYNONYMOUS_CODING	MODERATE	MISSENSE	aCc/aTc	T166I	c.497C>T	Chsy3	ENSMUST00000080721	1	0.4167
B16F10 ATCC	chr9	65280130	rs262051220	TG	T	FRAME_SHIFT	HIGH		ggc/	G1170fs	c.3509delG	Cilp	ENSMUST00000048762	10	0.9692
B16F10 ATCC	chr5	115985533	.	A	T	NON_SYNONYMOUS_CODING	MODERATE	MISSENSE	Agc/Tgc	S1478C	c.4432A>T	Cit	ENSMUST00000102560	33	0.2791
B16F10 ATCC	chr1	118497696	.	T	G	NON_SYNONYMOUS_CODING	MODERATE	MISSENSE	Tca/Gca	S259A	c.775T>G	Clasp1	ENSMUST00000190571	8	0.1300
B16F10 ATCC	chr3	144746953	.	T	G	NON_SYNONYMOUS_CODING	MODERATE	MISSENSE	Agt/Cgt	S590R	c.1768A>C	Clca1	ENSMUST00000059091	11	0.2419
B16F10 ATCC	chr6	42300360	.	C	A	NON_SYNONYMOUS_CODING	MODERATE	MISSENSE	Ctc/Atc	L462I	c.1384C>A	Clcn1	ENSMUST00000031894	12	0.2578
B16F10 ATCC	chr6	42307256	.	A	C	NON_SYNONYMOUS_CODING	MODERATE	MISSENSE	aAg/aCg	K586T	c.1757A>C	Clcn1	ENSMUST00000031894	15	0.3540
B16F10 ATCC	chr5	134946598	.	G	A	NON_SYNONYMOUS_CODING	MODERATE	MISSENSE	Ctc/Ttc	L50F	c.148C>T	Cldn4	ENSMUST00000051401	1	0.5132
B16F10 ATCC	chr6	128894675	.	A	T	NON_SYNONYMOUS_CODING	MODERATE	MISSENSE	aAg/aTg	K108M	c.323A>T	Clec2i	ENSMUST00000162666	5	0.1335
B16F10 ATCC	chr8	3716548	.	T	G	NON_SYNONYMOUS_CODING	MODERATE	MISSENSE	aAc/aCc	N251T	c.752A>C	Clec4g	ENSMUST00000062037	9	0.1538
B16F10 ATCC	chr14	65976913	.	A	C	NON_SYNONYMOUS_CODING	MODERATE	MISSENSE	gaA/gaC	E278D	c.834A>C	Clu	ENSMUST00000022616	6	0.3103
B16F10 ATCC	chr15	91245762	.	T	G	NON_SYNONYMOUS_CODING	MODERATE	MISSENSE	tTt/tGt	F276C	c.827T>G	CN725425	ENSMUST00000190436	8	0.1299
B16F10 ATCC	chrX	157853220	.	T	G	NON_SYNONYMOUS_CODING	MODERATE	MISSENSE	aAc/aCc	N854T	c.2561A>C	Cnksr2	ENSMUST00000026750	20	0.9286
B16F10 ATCC	chr1	179579565	.	G	C	NON_SYNONYMOUS_CODING	MODERATE	MISSENSE	gGg/gCg	G59A	c.176G>C	Cnst	ENSMUST00000040706	2	0.1781
B16F10 ATCC	chr6	102420294	.	A	G	NON_SYNONYMOUS_CODING	MODERATE	MISSENSE	cTt/cCt	L106P	c.317T>C	Cntn3	ENSMUST00000032159	3	0.1149
B16F10 ATCC	chr8	112752915	.	AT	A	SPLICE_SITE_REGION+INTRON	LOW				c.749-8delT	Cntnap4	ENSMUST00000034225	5	0.3617
B16F10 ATCC	chr8	112815520	.	C	G	NON_SYNONYMOUS_CODING	MODERATE	MISSENSE	Cct/Gct	P762A	c.2284C>G	Cntnap4	ENSMUST00000034225	15	0.2348
B16F10 ATCC	chr1	116060251	.	G	A	NON_SYNONYMOUS_CODING	MODERATE	MISSENSE	Gcc/Acc	A171T	c.511G>A	Cntnap5a	ENSMUST00000043725	4	0.1713
B16F10 ATCC	chr12	51596440	.	G	C	SPLICE_SITE_REGION+INTRON	LOW				c.246-4G>C	Coch	ENSMUST00000085412	4	0.2222
B16F10 ATCC	chr19	47652178	.	A	G	NON_SYNONYMOUS_CODING	MODERATE	MISSENSE	Tcc/Ccc	S994P	c.2980T>C	Col17a1	ENSMUST00000026045	43	0.1633
B16F10 ATCC	chr1	24279940	.	A	C	NON_SYNONYMOUS_CODING	MODERATE	MISSENSE	aTt/aGt	I1023S	c.3068T>G	Col19a1	ENSMUST00000115244	48	0.1971
B16F10 ATCC	chr8	11246859	.	T	G	SPLICE_SITE_REGION+INTRON	LOW				c.279+4A>C	Col4a1	ENSMUST00000033898	4	0.2292
B16F10 ATCC	chr1	82453196	.	A	C	NON_SYNONYMOUS_CODING	MODERATE	MISSENSE	Ttg/Gtg	L1662V	c.4984T>G	Col4a4	ENSMUST00000087050	48	0.2000
B16F10 ATCC	chrX	141616636	.	G	T	STOP_GAINED	HIGH	NONSENSE	Gga/Tga	G746*	c.2236G>T	Col4a5	ENSMUST00000112930	29	0.5000
B16F10 ATCC	chr10	76709559	.	C	G	STOP_LOST	HIGH	MISSENSE	taG/taC	*1026Yext*?	c.3078G>C	Col6a1	ENSMUST00000001147	35	0.5362
B16F10 ATCC	chr9	105926067	.	A	C	NON_SYNONYMOUS_CODING	MODERATE	MISSENSE	aTt/aGt	I1233S	c.3698T>G	Col6a5	ENSMUST00000190193	9	0.1594
B16F10 ATCC	chr9	105699299	.	G	C	NON_SYNONYMOUS_CODING	MODERATE	MISSENSE	gCc/gGc	A1954G	c.5861C>G	Col6a6	ENSMUST00000098441	35	0.3714
B16F10 ATCC	chr12	28612863	.	C	CT	FRAME_SHIFT+SPLICE_SITE_REGION	HIGH		aaa/aaaA	G69fs	c.204dupA	Colec11	ENSMUST00000036136	3	0.3415
B16F10 ATCC	chr18	9848727	.	A	G	NON_SYNONYMOUS_CODING	MODERATE	MISSENSE	Act/Gct	T302A	c.904A>G	Colec12	ENSMUST00000040069	5	0.3119
B16F10 ATCC	chr9	57156256	.	T	C	NON_SYNONYMOUS_CODING	MODERATE	MISSENSE	Agt/Ggt	S73G	c.217A>G	Commd4	ENSMUST00000065358	5	0.2237
B16F10 ATCC	chr6	87890186	.	T	G	SPLICE_SITE_REGION+INTRON	LOW				c.244-4T>G	Copg1	ENSMUST00000113607	4	0.1282
B16F10 ATCC	chr5	113850649	.	A	G	SPLICE_SITE_DONOR+INTRON	HIGH				c.630+2T>C	Coro1c	ENSMUST00000004646	5	0.3676
B16F10 ATCC	chr11	76801746	.	C	A	NON_SYNONYMOUS_CODING	MODERATE	MISSENSE	tGc/tTc	C755F	c.2264G>T	Cpd	ENSMUST00000021201	10	0.1631
B16F10 ATCC	chr6	113290022	.	A	C	NON_SYNONYMOUS_CODING	MODERATE	MISSENSE	Acc/Ccc	T139P	c.415A>C	Cpne9	ENSMUST00000041203	8	0.1176
B16F10 ATCC	chr4	155886970	.	G	A	NON_SYNONYMOUS_CODING	MODERATE	MISSENSE	Gac/Aac	D314N	c.940G>A	Cpsf3l	ENSMUST00000030901	9	0.6757
B16F10 ATCC	chr10	117356041	.	T	C	NON_SYNONYMOUS_CODING	MODERATE	MISSENSE	gAt/gGt	D555G	c.1664A>G	Cpsf6	ENSMUST00000176670	10	0.3426
B16F10 ATCC	chr3	90237751	.	C	T	NON_SYNONYMOUS_CODING	MODERATE	MISSENSE	Gtg/Atg	V365M	c.1093G>A	Creb3l4	ENSMUST00000029547	10	0.2979
B16F10 ATCC	chr6	55103216	.	A	G	NON_SYNONYMOUS_CODING	MODERATE	MISSENSE	gTt/gCt	V145A	c.434T>C	Crhr2	ENSMUST00000003568	5	0.2747
B16F10 ATCC	chr17	78367835	.	G	T	NON_SYNONYMOUS_CODING	MODERATE	MISSENSE	aaG/aaT	K824N	c.2472G>T	Crim1	ENSMUST00000112498	14	0.2500
B16F10 ATCC	chr1	17750319	.	G	A	NON_SYNONYMOUS_CODING	MODERATE	MISSENSE	tGc/tAc	C308Y	c.923G>A	Crispld1	ENSMUST00000095075	8	0.2023
B16F10 ATCC	chr1	17764076	.	A	G	NON_SYNONYMOUS_CODING	MODERATE	MISSENSE	Aca/Gca	T489A	c.1465A>G	Crispld1	ENSMUST00000095075	15	0.1367
B16F10 ATCC	chr9	40973644	.	G	T	SPLICE_SITE_REGION+INTRON	LOW				c.1058-7C>A	Crtam	ENSMUST00000180384	9	0.2254
B16F10 ATCC	chr15	78335298	.	A	G	SPLICE_SITE_REGION+INTRON	LOW				c.88+4A>G	Csf2rb	ENSMUST00000096355	2	0.3851
B16F10 ATCC	chr8	68401330	.	T	C	NON_SYNONYMOUS_CODING	MODERATE	MISSENSE	aAg/aGg	K273R	c.818A>G	Csgalnact1	ENSMUST00000078350	5	0.3789
B16F10 ATCC	chr6	118129075	.	C	A	NON_SYNONYMOUS_CODING	MODERATE	MISSENSE	aGa/aTa	R94I	c.281G>T	Csgalnact2	ENSMUST00000049344	2	0.1679
B16F10 ATCC	chr8	15921875	.	G	T	NON_SYNONYMOUS_CODING	MODERATE	MISSENSE	aCc/aAc	T2985N	c.8954C>A	Csmd1	ENSMUST00000082104	58	0.1667
B16F10 ATCC	chr8	16092258	.	C	T	NON_SYNONYMOUS_CODING	MODERATE	MISSENSE	Gat/Aat	D1544N	c.4630G>A	Csmd1	ENSMUST00000082104	29	0.2828
B16F10 ATCC	chr8	16189978	.	T	G	NON_SYNONYMOUS_CODING	MODERATE	MISSENSE	aAg/aCg	K1140T	c.3419A>C	Csmd1	ENSMUST00000082104	22	0.2833
B16F10 ATCC	chr8	16200058	.	G	T	NON_SYNONYMOUS_CODING	MODERATE	MISSENSE	Cag/Aag	Q969K	c.2905C>A	Csmd1	ENSMUST00000082104	20	0.2297
B16F10 ATCC	chr8	16346617	.	T	C	NON_SYNONYMOUS_CODING	MODERATE	MISSENSE	gAc/gGc	D433G	c.1298A>G	Csmd1	ENSMUST00000082104	10	0.2143
B16F10 ATCC	chr15	47636393	.	G	A	NON_SYNONYMOUS_CODING	MODERATE	MISSENSE	Ctt/Ttt	L3027F	c.9079C>T	Csmd3	ENSMUST00000100670	57	0.2010
B16F10 ATCC	chr15	47847281	.	G	A	NON_SYNONYMOUS_CODING	MODERATE	MISSENSE	Cca/Tca	P1637S	c.4909C>T	Csmd3	ENSMUST00000100670	30	0.2177
B16F10 ATCC	chr9	56886036	.	C	A	NON_SYNONYMOUS_CODING	MODERATE	MISSENSE	Ctg/Atg	L352M	c.1054C>A	Cspg4	ENSMUST00000035661	3	0.4915
B16F10 ATCC	chr1	10083546	.	C	G	NON_SYNONYMOUS_CODING	MODERATE	MISSENSE	gaC/gaG	D393E	c.1179C>G	Cspp1	ENSMUST00000071087	11	0.1963
B16F10 ATCC	chr2	66022346	.	A	C	NON_SYNONYMOUS_CODING	MODERATE	MISSENSE	Agc/Cgc	S373R	c.1117A>C	Csrnp3	ENSMUST00000053910	6	0.1875
B16F10 ATCC	chr2	173118344	.	G	A	NON_SYNONYMOUS_CODING	MODERATE	MISSENSE	Cac/Tac	H149Y	c.445C>T	Ctcfl	ENSMUST00000094287	2	0.2895
B16F10 ATCC	chr6	77143907	.	C	T	NON_SYNONYMOUS_CODING	MODERATE	MISSENSE	Gcg/Acg	A378T	c.1132G>A	Ctnna2	ENSMUST00000160894	9	0.1139
B16F10 ATCC	chr6	77636711	.	T	TC	SPLICE_SITE_REGION+INTRON	LOW				c.891+3_891+4insG	Ctnna2	ENSMUST00000160894	7	0.3651
B16F10 ATCC	chr10	63581978	.	C	T	NON_SYNONYMOUS_CODING	MODERATE	MISSENSE	tCc/tTc	S165F	c.494C>T	Ctnna3	ENSMUST00000075099	4	0.2241
B16F10 ATCC	chr15	30966813	.	A	C	NON_SYNONYMOUS_CODING	MODERATE	MISSENSE	aAc/aCc	N970T	c.2909A>C	Ctnnd2	ENSMUST00000081728	18	0.3827
B16F10 ATCC	chr7	111030224	.	T	C	NON_SYNONYMOUS_CODING	MODERATE	MISSENSE	cTt/cCt	L19P	c.56T>C	Ctr9	ENSMUST00000005749	2	0.4409
B16F10 ATCC	chr7	142376597	.	C	T	NON_SYNONYMOUS_CODING	MODERATE	MISSENSE	Ggc/Agc	G403S	c.1207G>A	Ctsd	ENSMUST00000151120	9	0.2016
B16F10 ATCC	chr3	95501477	.	G	A	SPLICE_SITE_REGION+INTRON	LOW				c.243+8G>A	Ctsk	ENSMUST00000015664	3	0.2424
B16F10 ATCC	chr13	61039464	.	T	G	NON_SYNONYMOUS_CODING	MODERATE	MISSENSE	aAa/aCa	K30T	c.89A>C	Ctsq	ENSMUST00000021888	2	0.3179
B16F10 ATCC	chr2	13294229	.	G	A	NON_SYNONYMOUS_CODING	MODERATE	MISSENSE	tCg/tTg	S3211L	c.9632C>T	Cubn	ENSMUST00000091436	60	0.2941
B16F10 ATCC	chr19	46331117	.	C	T	SPLICE_SITE_REGION+INTRON	LOW				c.586-4G>A	Cuedc2	ENSMUST00000051234	6	0.2877
B16F10 ATCC	chr1	80290091	.	A	G	NON_SYNONYMOUS_CODING	MODERATE	MISSENSE	gTt/gCt	V177A	c.530T>C	Cul3	ENSMUST00000163119	4	0.2262
B16F10 ATCC	chr11	70455978	.	C	T	NON_SYNONYMOUS_CODING	MODERATE	MISSENSE	gGg/gAg	G126E	c.377G>A	Cxcl16	ENSMUST00000019064	4	0.2349
B16F10 ATCC	chr7	55875052	.	A	C	NON_SYNONYMOUS_CODING	MODERATE	MISSENSE	aAg/aCg	K178T	c.533A>C	Cyfip1	ENSMUST00000032629	6	0.2264
B16F10 ATCC	chr17	34803559	.	T	C	NON_SYNONYMOUS_CODING	MODERATE	MISSENSE	gAg/gGg	E142G	c.425A>G	Cyp21a1	ENSMUST00000025223	3	0.2459
B16F10 ATCC	chr7	27035420	.	A	G	NON_SYNONYMOUS_CODING	MODERATE	MISSENSE	aAg/aGg	K422R	c.1265A>G	Cyp2a12	ENSMUST00000075552	8	0.2200
B16F10 ATCC	chr7	26841107	.	G	T	NON_SYNONYMOUS_CODING	MODERATE	MISSENSE	Gat/Tat	D382Y	c.1144G>T	Cyp2a5	ENSMUST00000005685	7	0.2188
B16F10 ATCC	chr7	26681411	.	C	G	NON_SYNONYMOUS_CODING	MODERATE	MISSENSE	Gcc/Ccc	A130P	c.388G>C	Cyp2b23	ENSMUST00000077356	3	0.2000
B16F10 ATCC	chr19	40097955	.	C	T	NON_SYNONYMOUS_CODING+SPLICE_SITE_REGION	MODERATE	MISSENSE	gCt/gTt	A321V	c.962C>T	Cyp2c50	ENSMUST00000080171	7	0.9387
B16F10 ATCC	chr19	39739463	.	C	T	NON_SYNONYMOUS_CODING	MODERATE	MISSENSE	Gca/Aca	A82T	c.244G>A	Cyp2c68	ENSMUST00000099472	2	0.2231
B16F10 ATCC	chr15	82390111	.	C	A	NON_SYNONYMOUS_CODING	MODERATE	MISSENSE	atG/atT	M356I	c.1068G>T	Cyp2d11	ENSMUST00000170255	7	0.1950
B16F10 ATCC	chr7	27129322	.	T	G	NON_SYNONYMOUS_CODING	MODERATE	MISSENSE	Ttc/Gtc	F206V	c.616T>G	Cyp2f2	ENSMUST00000003100	5	0.2500
B16F10 ATCC	chr7	26814748	.	G	A	NON_SYNONYMOUS_CODING	MODERATE	MISSENSE	Gac/Aac	D260N	c.778G>A	Cyp2g1	ENSMUST00000040944	5	0.3363
B16F10 ATCC	chr7	26816538	.	T	G	SPLICE_SITE_REGION+INTRON	LOW				c.832-6T>G	Cyp2g1	ENSMUST00000040944	5	0.2476
B16F10 ATCC	chr4	96227510	.	C	T	SPLICE_SITE_REGION+INTRON	LOW				c.690+8G>A	Cyp2j7	ENSMUST00000162514	4	0.2438
B16F10 ATCC	chr7	114551974	.	C	T	NON_SYNONYMOUS_CODING	MODERATE	MISSENSE	aGa/aAa	R370K	c.1109G>A	Cyp2r1	ENSMUST00000032908	4	0.2167
B16F10 ATCC	chr7	27157746	.	G	C	NON_SYNONYMOUS_CODING	MODERATE	MISSENSE	Ggt/Cgt	G345R	c.1033G>C	Cyp2t4	ENSMUST00000164093	8	0.2151
B16F10 ATCC	chr5	145977710	.	A	G	SPLICE_SITE_REGION+INTRON	LOW				c.1417-8T>C	Cyp3a25	ENSMUST00000068317	12	0.2671
B16F10 ATCC	chr5	146098222	.	A	C	NON_SYNONYMOUS_CODING	MODERATE	MISSENSE	Aat/Cat	N237H	c.709A>C	Cyp3a59	ENSMUST00000035571	8	0.2500
B16F10 ATCC	chr4	115248496	.	T	G	NON_SYNONYMOUS_CODING	MODERATE	MISSENSE	Ttt/Gtt	F132V	c.394T>G	Cyp4a29	ENSMUST00000118278	4	0.3317
B16F10 ATCC	chr17	32692690	.	G	C	SPLICE_SITE_REGION+INTRON	LOW				c.540+5G>C	Cyp4f15	ENSMUST00000168171	5	0.1705
B16F10 ATCC	chr17	32674002	.	G	A	SPLICE_SITE_REGION+INTRON	LOW				c.985+5G>A	Cyp4f40	ENSMUST00000165061	7	0.2344
B16F10 ATCC	chr19	18717315	.	A	T	NON_SYNONYMOUS_CODING	MODERATE	MISSENSE	Agc/Tgc	S145C	c.433A>T	D030056L22Rik	ENSMUST00000062753	2	0.2679
B16F10 ATCC	chr8	105231172	.	C	T	NON_SYNONYMOUS_CODING	MODERATE	MISSENSE	Cgc/Tgc	R37C	c.109C>T	D230025D16Rik	ENSMUST00000034361	2	0.2115
B16F10 ATCC	chr7	134294982	.	T	G	NON_SYNONYMOUS_CODING	MODERATE	MISSENSE	Agt/Cgt	S560R	c.1678A>C	D7Ertd443e	ENSMUST00000172947	5	0.4554
B16F10 ATCC	chr4	104479232	.	A	C	NON_SYNONYMOUS_CODING	MODERATE	MISSENSE	caA/caC	Q8H	c.24A>C	Dab1	ENSMUST00000106830	2	0.5481
B16F10 ATCC	chr9	108208668	.	G	C	NON_SYNONYMOUS_CODING	MODERATE	MISSENSE	Cca/Gca	P425A	c.1273C>G	Dag1	ENSMUST00000080435	4	0.2429
B16F10 ATCC	chr9	66246477	.	T	C	NON_SYNONYMOUS_CODING	MODERATE	MISSENSE	Ttt/Ctt	F172L	c.514T>C	Dapk2	ENSMUST00000034944	5	0.5473
B16F10 ATCC	chr1	83205964	.	A	T	NON_SYNONYMOUS_CODING+SPLICE_SITE_REGION	MODERATE	MISSENSE	aAg/aTg	K350M	c.1049A>T	Daw1	ENSMUST00000065403	11	0.2120
B16F10 ATCC	chr17	50289246	.	T	G	SPLICE_SITE_REGION+INTRON	LOW				c.4-8A>C	Dazl	ENSMUST00000010736	1	0.2656
B16F10 ATCC	chr8	123509998	.	T	C	SPLICE_SITE_REGION+INTRON	LOW				c.134-4A>G	Dbndd1	ENSMUST00000176155	1	0.2195
B16F10 ATCC	chr11	5796797	.	A	T	STOP_GAINED	HIGH	NONSENSE	Aag/Tag	K176*	c.526A>T	Dbnl	ENSMUST00000020769	6	0.2168
B16F10 ATCC	chr15	95654665	.	T	A	NON_SYNONYMOUS_CODING	MODERATE	MISSENSE	aAg/aTg	K33M	c.98A>T	Dbx2	ENSMUST00000054244	1	0.2800
B16F10 ATCC	chr15	39145247	.	C	T	NON_SYNONYMOUS_CODING	MODERATE	MISSENSE	Cgc/Tgc	R415C	c.1243C>T	Dcaf13	ENSMUST00000022909	10	0.3625
B16F10 ATCC	chr8	84102781	.	A	C	NON_SYNONYMOUS_CODING	MODERATE	MISSENSE	Tgg/Ggg	W111G	c.331T>G	Dcaf15	ENSMUST00000041367	3	0.2206
B16F10 ATCC	chr2	71056053	.	C	G	NON_SYNONYMOUS_CODING	MODERATE	MISSENSE	ttC/ttG	F20L	c.60C>G	Dcaf17	ENSMUST00000064141	1	0.2500
B16F10 ATCC	chr3	55500105	.	G	T	NON_SYNONYMOUS_CODING	MODERATE	MISSENSE	gGc/gTc	G558V	c.1673G>T	Dclk1	ENSMUST00000054237	12	0.2712
B16F10 ATCC	chr2	3438080	.	G	T	NON_SYNONYMOUS_CODING	MODERATE	MISSENSE	gaG/gaT	E222D	c.666G>T	Dclre1c	ENSMUST00000102988	8	0.1744
B16F10 ATCC	chr8	71474495	.	C	G	NON_SYNONYMOUS_CODING	MODERATE	MISSENSE	gCc/gGc	A69G	c.206C>G	Dda1	ENSMUST00000124745	5	0.2273
B16F10 ATCC	chr19	10619230	.	C	A	NON_SYNONYMOUS_CODING	MODERATE	MISSENSE	Cta/Ata	L438I	c.1312C>A	Ddb1	ENSMUST00000025649	12	0.3062
B16F10 ATCC	chr3	137626362	.	G	C	NON_SYNONYMOUS_CODING	MODERATE	MISSENSE	gGc/gCc	G163A	c.488G>C	Ddit4l	ENSMUST00000053855	3	0.1628
B16F10 ATCC	chr15	98806139	.	T	C	NON_SYNONYMOUS_CODING	MODERATE	MISSENSE	gAg/gGg	E424G	c.1271A>G	Ddn	ENSMUST00000075444	2	0.8372
B16F10 ATCC	chr1	121554084	.	C	G	NON_SYNONYMOUS_CODING	MODERATE	MISSENSE	gGc/gCc	G632A	c.1895G>C	Ddx18	ENSMUST00000001724	13	0.2381
B16F10 ATCC	chr8	111015575	.	T	G	NON_SYNONYMOUS_CODING	MODERATE	MISSENSE	aAg/aCg	K176T	c.527A>C	Ddx19b	ENSMUST00000065784	6	0.2013
B16F10 ATCC	chr15	98647621	.	A	G	NON_SYNONYMOUS_CODING	MODERATE	MISSENSE	gTc/gCc	V602A	c.1805T>C	Ddx23	ENSMUST00000003450	14	0.3934
B16F10 ATCC	chr9	78413731	.	A	AT	SPLICE_SITE_REGION+INTRON	LOW				c.1032-4dupT	Ddx43	ENSMUST00000113367	8	0.2776
B16F10 ATCC	chr11	106782013	.	T	G	NON_SYNONYMOUS_CODING	MODERATE	MISSENSE	aAt/aCt	N562T	c.1685A>C	Ddx5	ENSMUST00000021062	13	0.1765
B16F10 ATCC	chr5	120624539	.	C	T	NON_SYNONYMOUS_CODING+SPLICE_SITE_REGION	MODERATE	MISSENSE	aCc/aTc	T575I	c.1724C>T	Ddx54	ENSMUST00000031598	15	0.3077
B16F10 ATCC	chr1	136432451	.	A	C	NON_SYNONYMOUS_CODING	MODERATE	MISSENSE	aAt/aCt	N401T	c.1202A>C	Ddx59	ENSMUST00000027655	5	0.1548
B16F10 ATCC	chr8	123456498	.	A	G	NON_SYNONYMOUS_CODING	MODERATE	MISSENSE	Aga/Gga	R255G	c.763A>G	Def8	ENSMUST00000093049	7	0.5111
B16F10 ATCC	chr8	19195184	.	G	T	NON_SYNONYMOUS_CODING	MODERATE	MISSENSE	gGt/gTt	G59V	c.176G>T	Defb14	ENSMUST00000052601	2	0.1395
B16F10 ATCC	chr8	19447541	.	A	C	NON_SYNONYMOUS_CODING	MODERATE	MISSENSE	cTt/cGt	L18R	c.53T>G	Defb8	ENSMUST00000033854	1	0.3084
B16F10 ATCC	chr8	21881867	.	A	C	NON_SYNONYMOUS_CODING	MODERATE	MISSENSE	ttT/ttG	F43L	c.129T>G	Defb9	ENSMUST00000057076	2	0.2561
B16F10 ATCC	chr2	37800692	.	A	G	NON_SYNONYMOUS_CODING	MODERATE	MISSENSE	Tca/Cca	S799P	c.2395T>C	Dennd1a	ENSMUST00000102787	22	0.2353
B16F10 ATCC	chr3	106499874	.	C	T	STOP_GAINED	HIGH	NONSENSE	Cga/Tga	R414*	c.1240C>T	Dennd2d	ENSMUST00000183271	11	0.1887
B16F10 ATCC	chr9	64872022	.	G	A	NON_SYNONYMOUS_CODING	MODERATE	MISSENSE	Gca/Aca	A596T	c.1786G>A	Dennd4a	ENSMUST00000038890	14	0.3039
B16F10 ATCC	chr9	64907125	.	T	G	NON_SYNONYMOUS_CODING	MODERATE	MISSENSE	Tca/Gca	S1512A	c.4534T>G	Dennd4a	ENSMUST00000038890	27	0.2265
B16F10 ATCC	chr7	109894747	.	T	G	NON_SYNONYMOUS_CODING	MODERATE	MISSENSE	gAc/gCc	D1250A	c.3749A>C	Dennd5a	ENSMUST00000080437	23	0.2295
B16F10 ATCC	chr7	109905273	.	T	C	NON_SYNONYMOUS_CODING	MODERATE	MISSENSE	Aag/Gag	K878E	c.2632A>G	Dennd5a	ENSMUST00000080437	15	0.2537
B16F10 ATCC	chr6	137837118	.	T	G	NON_SYNONYMOUS_CODING+SPLICE_SITE_REGION	MODERATE	MISSENSE	atT/atG	I301M	c.903T>G	Dera	ENSMUST00000087675	9	0.1683
B16F10 ATCC	chr1	178187944	.	A	G	NON_SYNONYMOUS_CODING	MODERATE	MISSENSE	aAc/aGc	N10S	c.29A>G	Desi2	ENSMUST00000027783	1	0.6000
B16F10 ATCC	chr1	87929841	.	A	C	SPLICE_SITE_REGION+INTRON	LOW				c.2270+4A>C	Dgkd	ENSMUST00000027517	18	0.1563
B16F10 ATCC	chr16	22469328	.	T	G	NON_SYNONYMOUS_CODING	MODERATE	MISSENSE	aAc/aCc	N763T	c.2288A>C	Dgkg	ENSMUST00000089925	25	0.2353
B16F10 ATCC	chr16	22572686	.	A	T	NON_SYNONYMOUS_CODING	MODERATE	MISSENSE	Tcc/Acc	S341T	c.1021T>A	Dgkg	ENSMUST00000089925	12	0.1750
B16F10 ATCC	chr15	98894909	.	T	C	NON_SYNONYMOUS_CODING	MODERATE	MISSENSE	Aat/Gat	N157D	c.469A>G	Dhh	ENSMUST00000023737	2	0.7665
B16F10 ATCC	chr2	5911874	.	C	A	NON_SYNONYMOUS_CODING	MODERATE	MISSENSE	Gct/Tct	A664S	c.1990G>T	Dhtkd1	ENSMUST00000026924	11	0.3590
B16F10 ATCC	chr5	125416591	.	T	C	NON_SYNONYMOUS_CODING	MODERATE	MISSENSE	gAg/gGg	E968G	c.2903A>G	Dhx37	ENSMUST00000169485	22	0.2244
B16F10 ATCC	chr17	80251348	.	A	C	NON_SYNONYMOUS_CODING	MODERATE	MISSENSE	Ttg/Gtg	L1061V	c.3181T>G	Dhx57	ENSMUST00000086555	17	0.1783
B16F10 ATCC	chr10	76285628	.	T	C	NON_SYNONYMOUS_CODING	MODERATE	MISSENSE	aAg/aGg	K798R	c.2393A>G	Dip2a	ENSMUST00000105417	21	0.6549
B16F10 ATCC	chr11	70031130	.	G	A	NON_SYNONYMOUS_CODING	MODERATE	MISSENSE	cGg/cAg	R169Q	c.506G>A	Dlg4	ENSMUST00000108589	8	0.5106
B16F10 ATCC	chr14	24158094	.	G	A	NON_SYNONYMOUS_CODING	MODERATE	MISSENSE	Ccc/Tcc	P1015S	c.3043C>T	Dlg5	ENSMUST00000090398	15	0.2542
B16F10 ATCC	chr8	14822472	.	C	G	NON_SYNONYMOUS_CODING	MODERATE	MISSENSE	gCc/gGc	A651G	c.1952C>G	Dlgap2	ENSMUST00000152652	9	0.5789
B16F10 ATCC	chr6	6879607	.	C	A	NON_SYNONYMOUS_CODING	MODERATE	MISSENSE	caG/caT	Q153H	c.459G>T	Dlx5	ENSMUST00000052609	2	0.2372
B16F10 ATCC	chrX	83878495	.	C	T	NON_SYNONYMOUS_CODING	MODERATE	MISSENSE	tCc/tTc	S1457F	c.4370C>T	Dmd	ENSMUST00000114000	32	0.5625
B16F10 ATCC	chrX	84575760	.	A	G	NON_SYNONYMOUS_CODING	MODERATE	MISSENSE	Aca/Gca	T2614A	c.7840A>G	Dmd	ENSMUST00000114000	53	0.5227
B16F10 ATCC	chr7	30778241	.	G	T	NON_SYNONYMOUS_CODING	MODERATE	MISSENSE	tGg/tTg	W491L	c.1472G>T	Dmkn	ENSMUST00000165887	17	0.1284
B16F10 ATCC	chr19	25678642	.	T	G	NON_SYNONYMOUS_CODING	MODERATE	MISSENSE	cTt/cGt	L535R	c.1604T>G	Dmrt2	ENSMUST00000053068	4	0.2252
B16F10 ATCC	chr18	49920965	.	A	G	NON_SYNONYMOUS_CODING	MODERATE	MISSENSE	aAt/aGt	N2558S	c.7673A>G	Dmxl1	ENSMUST00000041772	32	0.2917
B16F10 ATCC	chr7	4523795	.	G	A	NON_SYNONYMOUS_CODING	MODERATE	MISSENSE	Cgg/Tgg	R428W	c.1282C>T	Dnaaf3	ENSMUST00000094897	12	0.2286
B16F10 ATCC	chr14	31304811	.	T	G	NON_SYNONYMOUS_CODING+SPLICE_SITE_REGION	MODERATE	MISSENSE	aAg/aCg	K752T	c.2255A>C	Dnah1	ENSMUST00000048603	13	0.3889
B16F10 ATCC	chr12	117895012	.	G	C	NON_SYNONYMOUS_CODING	MODERATE	MISSENSE	aCa/aGa	T4121R	c.12362C>G	Dnah11	ENSMUST00000084806	76	0.3639
B16F10 ATCC	chr12	117916868	.	T	C	NON_SYNONYMOUS_CODING	MODERATE	MISSENSE	aAg/aGg	K3839R	c.11516A>G	Dnah11	ENSMUST00000084806	71	0.1475
B16F10 ATCC	chr12	117982969	.	C	A	NON_SYNONYMOUS_CODING	MODERATE	MISSENSE	Gcg/Tcg	A3127S	c.9379G>T	Dnah11	ENSMUST00000084806	57	0.4273
B16F10 ATCC	chr12	117995238	.	T	G	NON_SYNONYMOUS_CODING	MODERATE	MISSENSE	aAg/aCg	K2970T	c.8909A>C	Dnah11	ENSMUST00000084806	55	0.2000
B16F10 ATCC	chr11	69430793	.	A	C	NON_SYNONYMOUS_CODING	MODERATE	MISSENSE	cTt/cGt	L3847R	c.11540T>G	Dnah2	ENSMUST00000108659	75	0.1644
B16F10 ATCC	chr15	28366357	.	G	A	NON_SYNONYMOUS_CODING+SPLICE_SITE_REGION	MODERATE	MISSENSE	Ggt/Agt	G2739S	c.8215G>A	Dnah5	ENSMUST00000067048	49	0.4253
B16F10 ATCC	chr15	28384230	.	A	C	NON_SYNONYMOUS_CODING	MODERATE	MISSENSE	gAt/gCt	D3040A	c.9119A>C	Dnah5	ENSMUST00000067048	55	0.1900
B16F10 ATCC	chr1	53468643	.	A	C	NON_SYNONYMOUS_CODING	MODERATE	MISSENSE	Tat/Gat	Y3090D	c.9268T>G	Dnah7a	ENSMUST00000094964	50	0.2936
B16F10 ATCC	chr1	53577336	.	TA	T	SPLICE_SITE_REGION+INTRON	LOW				c.3472-8delT	Dnah7a	ENSMUST00000094964	22	0.1448
B16F10 ATCC	chr1	46195339	.	G	A	NON_SYNONYMOUS_CODING	MODERATE	MISSENSE	gGg/gAg	G1477E	c.4430G>A	Dnah7b	ENSMUST00000069293	28	0.1051
B16F10 ATCC	chr17	30686450	.	C	T	NON_SYNONYMOUS_CODING	MODERATE	MISSENSE	tCc/tTc	S976F	c.2927C>T	Dnah8	ENSMUST00000170651	21	0.1546
B16F10 ATCC	chr17	30807232	.	GC	G	FRAME_SHIFT	HIGH		ccc/	P4038fs	c.12114delC	Dnah8	ENSMUST00000170651	80	0.1615
B16F10 ATCC	chr17	30819143	.	C	G	NON_SYNONYMOUS_CODING	MODERATE	MISSENSE	Cca/Gca	P4259A	c.12775C>G	Dnah8	ENSMUST00000170651	85	0.1098
B16F10 ATCC	chr17	30855957	.	G	T	NON_SYNONYMOUS_CODING	MODERATE	MISSENSE	tGg/tTg	W4550L	c.13649G>T	Dnah8	ENSMUST00000170651	91	0.1376
B16F10 ATCC	chr10	59890054	.	C	A	NON_SYNONYMOUS_CODING	MODERATE	MISSENSE	Cca/Aca	P54T	c.160C>A	Dnajb12	ENSMUST00000147914	2	0.4348
B16F10 ATCC	chr1	88205593	.	T	G	NON_SYNONYMOUS_CODING	MODERATE	MISSENSE	aAg/aCg	K29T	c.86A>C	Dnajb3	ENSMUST00000119972	1	0.3684
B16F10 ATCC	chr6	88222845	.	G	A	NON_SYNONYMOUS_CODING	MODERATE	MISSENSE	gGc/gAc	G121D	c.362G>A	Dnajb8	ENSMUST00000061866	1	0.2938
B16F10 ATCC	chr4	101639329	.	G	A	NON_SYNONYMOUS_CODING	MODERATE	MISSENSE	Gtg/Atg	V898M	c.2692G>A	Dnajc6	ENSMUST00000106933	18	0.5185
B16F10 ATCC	chr19	43902122	.	G	A	NON_SYNONYMOUS_CODING	MODERATE	MISSENSE	cCc/cTc	P402L	c.1205C>T	Dnmbp	ENSMUST00000026209	3	0.2840
B16F10 ATCC	chr7	134804547	.	A	G	NON_SYNONYMOUS_CODING	MODERATE	MISSENSE	tAt/tGt	Y760C	c.2279A>G	Dock1	ENSMUST00000084488	23	0.3089
B16F10 ATCC	chr1	80532347	.	T	C	NON_SYNONYMOUS_CODING	MODERATE	MISSENSE	aAg/aGg	K1601R	c.4802A>G	Dock10	ENSMUST00000077946	43	0.1829
B16F10 ATCC	chrX	36002533	.	A	G	NON_SYNONYMOUS_CODING	MODERATE	MISSENSE	aAg/aGg	K902R	c.2705A>G	Dock11	ENSMUST00000033419	25	0.4660
B16F10 ATCC	chr11	34266237	.	T	G	SPLICE_SITE_REGION+INTRON	LOW				c.3662+4A>C	Dock2	ENSMUST00000093193	36	0.2645
B16F10 ATCC	chr11	34438300	.	G	A	NON_SYNONYMOUS_CODING	MODERATE	MISSENSE	aCg/aTg	T924M	c.2771C>T	Dock2	ENSMUST00000093193	27	0.4393
B16F10 ATCC	chr11	34692382	.	A	C	NON_SYNONYMOUS_CODING	MODERATE	MISSENSE	cTt/cGt	L568R	c.1703T>G	Dock2	ENSMUST00000093193	18	0.1744
B16F10 ATCC	chr11	34695212	.	C	A	STOP_GAINED	HIGH	NONSENSE	Gag/Tag	E548*	c.1642G>T	Dock2	ENSMUST00000093193	17	0.2121
B16F10 ATCC	chr4	99072401	.	T	G	SPLICE_SITE_REGION+INTRON	LOW				c.885+4A>C	Dock7	ENSMUST00000030286	8	0.3874
B16F10 ATCC	chr14	121555275	.	C	T	NON_SYNONYMOUS_CODING	MODERATE	MISSENSE	Gtg/Atg	V1877M	c.5629G>A	Dock9	ENSMUST00000040700	50	0.3913
B16F10 ATCC	chr16	93763326	.	C	T	NON_SYNONYMOUS_CODING	MODERATE	MISSENSE	aCc/aTc	T838I	c.2513C>T	Dopey2	ENSMUST00000045004	15	0.3200
B16F10 ATCC	chr19	5902444	.	A	C	NON_SYNONYMOUS_CODING	MODERATE	MISSENSE	Ttc/Gtc	F289V	c.865T>G	Dpf2	ENSMUST00000118623	9	0.3291
B16F10 ATCC	chr1	123486132	.	T	TA	SPLICE_SITE_REGION+INTRON	LOW				c.454-8dupT	Dpp10	ENSMUST00000112606	5	0.1301
B16F10 ATCC	chr2	62374530	.	G	GA	SPLICE_SITE_REGION+INTRON	LOW				c.596-5dupT	Dpp4	ENSMUST00000047812	8	0.2208
B16F10 ATCC	chr9	24660824	.	C	T	SPLICE_SITE_REGION+INTRON	LOW				c.907-8G>A	Dpy19l2	ENSMUST00000133010	7	0.2455
B16F10 ATCC	chr18	20046304	.	C	T	NON_SYNONYMOUS_CODING	MODERATE	MISSENSE	Gag/Aag	E236K	c.706G>A	Dsc2	ENSMUST00000075214	6	0.7568
B16F10 ATCC	chr16	96772561	.	A	C	NON_SYNONYMOUS_CODING	MODERATE	MISSENSE	Ttc/Gtc	F734V	c.2200T>G	Dscam	ENSMUST00000056102	11	0.4000
B16F10 ATCC	chr15	55080317	.	A	C	NON_SYNONYMOUS_CODING	MODERATE	MISSENSE	Tca/Gca	S386A	c.1156T>G	Dscc1	ENSMUST00000110231	9	0.3810
B16F10 ATCC	chr1	166099283	.	A	G	NON_SYNONYMOUS_CODING	MODERATE	MISSENSE	cTc/cCc	L920P	c.2759T>C	Dusp27	ENSMUST00000085992	6	0.2816
B16F10 ATCC	chr12	110629917	.	GA	G	FRAME_SHIFT	HIGH		agg/	R1601fs	c.4801delA	Dync1h1	ENSMUST00000018851	23	0.3300
B16F10 ATCC	chr9	7144177	.	A	AT	FRAME_SHIFT	HIGH		att/aAtt	I1088fs	c.3262dupA	Dync2h1	ENSMUST00000147193	22	0.4676
B16F10 ATCC	chr1	131129233	.	A	G	NON_SYNONYMOUS_CODING	MODERATE	MISSENSE	cTt/cCt	L401P	c.1202T>C	Dyrk3	ENSMUST00000016670	3	0.4255
B16F10 ATCC	chr7	104154150	.	T	G	NON_SYNONYMOUS_CODING	MODERATE	MISSENSE	Agt/Cgt	S369R	c.1105A>C	E030002O03Rik	ENSMUST00000051137	6	0.1371
B16F10 ATCC	chr6	40409080	.	T	C	NON_SYNONYMOUS_CODING	MODERATE	MISSENSE	tAc/tGc	Y361C	c.1082A>G	E330009J07Rik	ENSMUST00000101492	7	0.1424
B16F10 ATCC	chr10	81181889	.	G	C	NON_SYNONYMOUS_CODING+SPLICE_SITE_REGION	MODERATE	MISSENSE	gGc/gCc	G795A	c.2384G>C	Eef2	ENSMUST00000047864	14	0.5833
B16F10 ATCC	chr15	83955009	.	A	C	NON_SYNONYMOUS_CODING	MODERATE	MISSENSE	cTt/cGt	L383R	c.1148T>G	Efcab6	ENSMUST00000156187	11	0.1795
B16F10 ATCC	chr7	82692850	.	A	C	NON_SYNONYMOUS_CODING	MODERATE	MISSENSE	Agt/Cgt	S489R	c.1465A>C	Eftud1	ENSMUST00000039881	14	0.1910
B16F10 ATCC	chr3	129737422	.	G	T	STOP_GAINED	HIGH	NONSENSE	tCa/tAa	S168*	c.503C>A	Egf	ENSMUST00000029653	3	0.1538
B16F10 ATCC	chr17	34614241	.	C	A	NON_SYNONYMOUS_CODING	MODERATE	MISSENSE	gGt/gTt	G177V	c.530G>T	Egfl8	ENSMUST00000015611	6	0.1607
B16F10 ATCC	chr19	5716287	.	G	C	NON_SYNONYMOUS_CODING	MODERATE	MISSENSE	Ccc/Gcc	P1343A	c.4027C>G	Ehbp1l1	ENSMUST00000049295	12	0.5556
B16F10 ATCC	chr7	15963466	.	G	C	NON_SYNONYMOUS_CODING	MODERATE	MISSENSE	gCc/gGc	A139G	c.416C>G	Ehd2	ENSMUST00000098799	3	0.4688
B16F10 ATCC	chr2	122050613	.	T	G	NON_SYNONYMOUS_CODING	MODERATE	MISSENSE	tTt/tGt	F182C	c.545T>G	Eif3j1	ENSMUST00000028668	6	0.1512
B16F10 ATCC	chr7	28974599	.	T	C	SPLICE_SITE_REGION+INTRON	LOW				c.421+4A>G	Eif3k	ENSMUST00000066070	5	0.2088
B16F10 ATCC	chr2	105013256	.	A	C	NON_SYNONYMOUS_CODING	MODERATE	MISSENSE	cTc/cGc	L127R	c.380T>G	Eif3m	ENSMUST00000028592	4	0.1818
B16F10 ATCC	chr18	73739090	.	T	G	NON_SYNONYMOUS_CODING	MODERATE	MISSENSE	gAt/gCt	D278A	c.833A>C	Elac1	ENSMUST00000041138	4	0.3958
B16F10 ATCC	chr11	64992529	.	G	A	SPLICE_SITE_REGION+INTRON	LOW				c.1292+5G>A	Elac2	ENSMUST00000071891	14	0.2651
B16F10 ATCC	chr13	75761873	.	TCTAGGTGGC	T	SPLICE_SITE_ACCEPTOR+CODON_DELETION+SPLICE_SITE_REGION+SPLICE_SITE_REGION+INTRON	HIGH		caggtggcc/	V248_N250del	c.742-3_747delTAGGTGGCC	Ell2	ENSMUST00000001583	6	0.2746
B16F10 ATCC	chr9	53919614	.	A	C	NON_SYNONYMOUS_CODING	MODERATE	MISSENSE	Tct/Gct	S263A	c.787T>G	Elmod1	ENSMUST00000048409	10	0.2222
B16F10 ATCC	chr3	151500175	.	C	A	NON_SYNONYMOUS_CODING	MODERATE	MISSENSE	Ccg/Acg	P225T	c.673C>A	Eltd1	ENSMUST00000046977	6	0.4225
B16F10 ATCC	chr17	24894567	.	T	A	SPLICE_SITE_REGION+INTRON	LOW				c.366+4A>T	Eme2	ENSMUST00000121542	2	0.3788
B16F10 ATCC	chr12	108537459	.	T	G	NON_SYNONYMOUS_CODING	MODERATE	MISSENSE	Ttc/Gtc	F772V	c.2314T>G	Eml1	ENSMUST00000109860	21	0.3083
B16F10 ATCC	chr12	98837354	.	C	A	NON_SYNONYMOUS_CODING	MODERATE	MISSENSE	Gcc/Tcc	A1005S	c.3013G>T	Eml5	ENSMUST00000065716	21	0.1923
B16F10 ATCC	chr2	30173860	.	G	T	STOP_GAINED	HIGH	NONSENSE	Gag/Tag	E258*	c.772G>T	Endog	ENSMUST00000015481	3	0.1111
B16F10 ATCC	chr15	54847269	.	G	T	NON_SYNONYMOUS_CODING	MODERATE	MISSENSE	cCa/cAa	P755Q	c.2264C>A	Enpp2	ENSMUST00000171545	23	0.1853
B16F10 ATCC	chr15	81631860	.	A	T	SPLICE_SITE_REGION+INTRON	LOW				c.3498+7A>T	Ep300	ENSMUST00000068387	18	0.3969
B16F10 ATCC	chr17	69253522	.	T	G	NON_SYNONYMOUS_CODING	MODERATE	MISSENSE	Ttt/Gtt	F355V	c.1063T>G	Epb4.1l3	ENSMUST00000112680	9	0.2895
B16F10 ATCC	chr1	77506662	.	A	C	NON_SYNONYMOUS_CODING	MODERATE	MISSENSE	Tca/Gca	S237A	c.709T>G	Epha4	ENSMUST00000027451	3	0.2020
B16F10 ATCC	chr5	84237522	.	G	C	NON_SYNONYMOUS_CODING	MODERATE	MISSENSE	Cac/Gac	H317D	c.949C>G	Epha5	ENSMUST00000113403	4	0.6458
B16F10 ATCC	chr9	101984145	.	C	T	NON_SYNONYMOUS_CODING	MODERATE	MISSENSE	Gtc/Atc	V607I	c.1819G>A	Ephb1	ENSMUST00000035129	10	0.1720
B16F10 ATCC	chr14	66107318	.	A	G	NON_SYNONYMOUS_CODING	MODERATE	MISSENSE	Ttt/Ctt	F186L	c.556T>C	Ephx2	ENSMUST00000070515	5	0.6705
B16F10 ATCC	chr8	72386901	.	T	G	NON_SYNONYMOUS_CODING	MODERATE	MISSENSE	aAc/aCc	N249T	c.746A>C	Eps15l1	ENSMUST00000163643	9	0.3947
B16F10 ATCC	chr13	63853728	.	A	G	NON_SYNONYMOUS_CODING	MODERATE	MISSENSE	gAg/gGg	E419G	c.1256A>G	Ercc6l2	ENSMUST00000095724	11	0.2459
B16F10 ATCC	chr19	29612925	.	G	C	NON_SYNONYMOUS_CODING	MODERATE	MISSENSE	agC/agG	S792R	c.2376C>G	Ermp1	ENSMUST00000159692	14	0.2126
B16F10 ATCC	chr1	188150218	.	A	T	NON_SYNONYMOUS_CODING	MODERATE	MISSENSE	gAg/gTg	E247V	c.740A>T	Esrrg	ENSMUST00000027906	5	0.1795
B16F10 ATCC	chr11	17946465	.	T	C	NON_SYNONYMOUS_CODING	MODERATE	MISSENSE	Act/Gct	T551A	c.1651A>G	Etaa1	ENSMUST00000076661	5	0.2676
B16F10 ATCC	chr16	22383589	.	C	T	NON_SYNONYMOUS_CODING	MODERATE	MISSENSE	Gaa/Aaa	E490K	c.1468G>A	Etv5	ENSMUST00000168774	13	0.4803
B16F10 ATCC	chr12	111429487	.	G	A	NON_SYNONYMOUS_CODING	MODERATE	MISSENSE	Gac/Aac	D645N	c.1933G>A	Exoc3l4	ENSMUST00000072646	12	0.3497
B16F10 ATCC	chr6	84860188	.	A	C	NON_SYNONYMOUS_CODING	MODERATE	MISSENSE	tTc/tGc	F343C	c.1028T>G	Exoc6b	ENSMUST00000160197	10	0.1204
B16F10 ATCC	chr9	53337984	.	C	CA	FRAME_SHIFT+SPLICE_SITE_REGION	HIGH		aat/aaAt	N93fs	c.278dupA	Exph5	ENSMUST00000051014	2	0.2109
B16F10 ATCC	chr1	14208889	.	A	G	SPLICE_SITE_REGION+INTRON	LOW				c.1137+6T>C	Eya1	ENSMUST00000027066	12	0.2917
B16F10 ATCC	chr10	23113988	.	T	C	NON_SYNONYMOUS_CODING	MODERATE	MISSENSE	cAg/cGg	Q490R	c.1469A>G	Eya4	ENSMUST00000074366	16	0.4520
B16F10 ATCC	chr8	45245772	.	C	T	NON_SYNONYMOUS_CODING	MODERATE	MISSENSE	gGt/gAt	G445D	c.1334G>A	F11	ENSMUST00000034064	12	0.1892
B16F10 ATCC	chr13	36989012	.	C	T	STOP_GAINED	HIGH	NONSENSE	tgG/tgA	W131*	c.393G>A	F13a1	ENSMUST00000037491	4	0.3239
B16F10 ATCC	chr1	139508202	.	A	C	NON_SYNONYMOUS_CODING	MODERATE	MISSENSE	Agt/Cgt	S249R	c.745A>C	F13b	ENSMUST00000027615	5	0.2024
B16F10 ATCC	chr1	139516433	.	A	C	NON_SYNONYMOUS_CODING	MODERATE	MISSENSE	Ata/Cta	I502L	c.1504A>C	F13b	ENSMUST00000027615	9	0.1613
B16F10 ATCC	chr1	164154385	.	A	C	NON_SYNONYMOUS_CODING	MODERATE	MISSENSE	aAg/aCg	K73T	c.218A>C	F5	ENSMUST00000086040	2	0.3130
B16F10 ATCC	chrX	75323149	.	C	T	SPLICE_SITE_REGION+INTRON	LOW				c.1538-6G>A	F8	ENSMUST00000033539	10	0.3846
B16F10 ATCC	chr2	3772984	.	G	A	SPLICE_SITE_REGION+INTRON	LOW				c.194+5G>A	Fam107b	ENSMUST00000115052	3	0.1548
B16F10 ATCC	chr6	42593748	.	A	C	NON_SYNONYMOUS_CODING	MODERATE	MISSENSE	Ttg/Gtg	L357V	c.1069T>G	Fam115e	ENSMUST00000069023	2	0.1512
B16F10 ATCC	chr11	95371524	.	C	G	NON_SYNONYMOUS_CODING	MODERATE	MISSENSE	caC/caG	H151Q	c.453C>G	Fam117a	ENSMUST00000037502	3	0.3784
B16F10 ATCC	chr17	71714280	.	A	G	NON_SYNONYMOUS_CODING	MODERATE	MISSENSE	aAg/aGg	K688R	c.2063A>G	Fam179a	ENSMUST00000144479	14	0.5259
B16F10 ATCC	chr15	99945994	.	T	C	NON_SYNONYMOUS_CODING	MODERATE	MISSENSE	Agt/Ggt	S790G	c.2368A>G	Fam186a	ENSMUST00000100209	4	0.1655
B16F10 ATCC	chr5	34420895	.	A	T	NON_SYNONYMOUS_CODING	MODERATE	MISSENSE	gaA/gaT	E244D	c.732A>T	Fam193a	ENSMUST00000180376	4	0.2680
B16F10 ATCC	chr10	77490031	.	C	A	NON_SYNONYMOUS_CODING	MODERATE	MISSENSE	aGc/aTc	S168I	c.503G>T	Fam207a	ENSMUST00000045454	5	0.4714
B16F10 ATCC	chr6	116262332	.	A	G	SPLICE_SITE_REGION+INTRON	LOW				c.3866-3A>G	Fam21	ENSMUST00000036759	30	0.1429
B16F10 ATCC	chr8	105615571	.	C	T	STOP_GAINED	HIGH	NONSENSE	Cga/Tga	R130*	c.388C>T	Fam65a	ENSMUST00000043531	6	0.5246
B16F10 ATCC	chr11	46407723	.	G	A	NON_SYNONYMOUS_CODING	MODERATE	MISSENSE	aGa/aAa	R618K	c.1853G>A	Fam71b	ENSMUST00000063166	2	0.1846
B16F10 ATCC	chr9	76503171	.	T	C	NON_SYNONYMOUS_CODING	MODERATE	MISSENSE	atA/atG	I152M	c.456A>G	Fam83b	ENSMUST00000098546	2	0.2500
B16F10 ATCC	chr6	113581422	.	C	G	NON_SYNONYMOUS_CODING	MODERATE	MISSENSE	Cat/Gat	H1167D	c.3499C>G	Fancd2	ENSMUST00000036340	35	0.3262
B16F10 ATCC	chr6	148138658	.	A	C	NON_SYNONYMOUS_CODING	MODERATE	MISSENSE	aAg/aCg	K29T	c.86A>C	Far2	ENSMUST00000032443	2	0.3651
B16F10 ATCC	chr8	45023807	.	A	G	NON_SYNONYMOUS_CODING	MODERATE	MISSENSE	atA/atG	I1940M	c.5820A>G	Fat1	ENSMUST00000098796	9	0.5273
B16F10 ATCC	chr3	38887050	.	C	G	NON_SYNONYMOUS_CODING	MODERATE	MISSENSE	Cta/Gta	L31V	c.91C>G	Fat4	ENSMUST00000061260	1	0.2857
B16F10 ATCC	chr3	38958492	.	C	G	NON_SYNONYMOUS_CODING	MODERATE	MISSENSE	gCc/gGc	A2312G	c.6935C>G	Fat4	ENSMUST00000061260	6	0.2500
B16F10 ATCC	chr15	85242082	.	T	G	NON_SYNONYMOUS_CODING	MODERATE	MISSENSE	Ttc/Gtc	F507V	c.1519T>G	Fbln1	ENSMUST00000057410	13	0.3107
B16F10 ATCC	chr6	91233346	.	G	A	NON_SYNONYMOUS_CODING	MODERATE	MISSENSE	Gac/Aac	D91N	c.271G>A	Fbln2	ENSMUST00000041544	2	0.3301
B16F10 ATCC	chr2	125350288	.	C	T	NON_SYNONYMOUS_CODING	MODERATE	MISSENSE	Gac/Aac	D1434N	c.4300G>A	Fbn1	ENSMUST00000028633	35	0.2653
B16F10 ATCC	chr18	58048530	.	C	A	SPLICE_SITE_REGION+INTRON	LOW				c.5653+5G>T	Fbn2	ENSMUST00000025497	44	0.2609
B16F10 ATCC	chr6	119480416	.	G	C	NON_SYNONYMOUS_CODING	MODERATE	MISSENSE	gGc/gCc	G186A	c.557G>C	Fbxl14	ENSMUST00000032094	1	0.2174
B16F10 ATCC	chr14	65293860	.	A	T	NON_SYNONYMOUS_CODING	MODERATE	MISSENSE	aAg/aTg	K71M	c.212A>T	Fbxo16	ENSMUST00000169656	4	0.3962
B16F10 ATCC	chr3	83031603	.	A	C	NON_SYNONYMOUS_CODING	MODERATE	MISSENSE	gaA/gaC	E428D	c.1284A>C	Fga	ENSMUST00000166581	5	0.1545
B16F10 ATCC	chr16	16484470	.	T	A	STOP_GAINED	HIGH	NONSENSE	Aag/Tag	K74*	c.220A>T	Fgd4	ENSMUST00000161861	4	0.2712
B16F10 ATCC	chr13	118715719	.	A	G	SPLICE_SITE_REGION+INTRON	LOW				c.328+8A>G	Fgf10	ENSMUST00000022246	1	0.6061
B16F10 ATCC	chr5	43979873	.	T	C	NON_SYNONYMOUS_CODING	MODERATE	MISSENSE	Aga/Gga	R26G	c.76A>G	Fgfbp1	ENSMUST00000061299	2	0.2138
B16F10 ATCC	chr7	130169799	.	A	T	NON_SYNONYMOUS_CODING	MODERATE	MISSENSE	cTt/cAt	L731H	c.2192T>A	Fgfr2	ENSMUST00000122054	16	0.3443
B16F10 ATCC	chr10	41253731	.	A	C	NON_SYNONYMOUS_CODING	MODERATE	MISSENSE	Ttc/Gtc	F498V	c.1492T>G	Fig4	ENSMUST00000043814	14	0.4819
B16F10 ATCC	chr2	64096902	.	A	C	NON_SYNONYMOUS_CODING	MODERATE	MISSENSE	agT/agG	S6R	c.18T>G	Fign	ENSMUST00000131615	2	0.2449
B16F10 ATCC	chr16	57513405	.	G	C	NON_SYNONYMOUS_CODING	MODERATE	MISSENSE	aGt/aCt	S187T	c.560G>C	Filip1l	ENSMUST00000159816	4	0.2217
B16F10 ATCC	chr2	163469865	.	C	T	NON_SYNONYMOUS_CODING	MODERATE	MISSENSE	Gaa/Aaa	E143K	c.427G>A	Fitm2	ENSMUST00000109418	2	0.2500
B16F10 ATCC	chr14	7905871	.	A	C	NON_SYNONYMOUS_CODING	MODERATE	MISSENSE	aAg/aCg	K1207T	c.3620A>C	Flnb	ENSMUST00000052678	21	0.2500
B16F10 ATCC	chr5	147681649	.	T	C	NON_SYNONYMOUS_CODING	MODERATE	MISSENSE	Acg/Gcg	T261A	c.781A>G	Flt1	ENSMUST00000031653	6	0.2360
B16F10 ATCC	chr5	147349564	.	C	G	SPLICE_SITE_DONOR+INTRON	HIGH				c.2210+1G>C	Flt3	ENSMUST00000049324	17	0.1717
B16F10 ATCC	chr2	113441925	.	A	C	NON_SYNONYMOUS_CODING	MODERATE	MISSENSE	Aca/Cca	T213P	c.637A>C	FMN1_	ENSMUST00000081349	1	0.4528
B16F10 ATCC	chr1	174719838	.	C	T	SPLICE_SITE_REGION+INTRON	LOW				c.4334-7C>T	Fmn2	ENSMUST00000030039	13	0.2424
B16F10 ATCC	chr1	71649292	.	A	G	NON_SYNONYMOUS_CODING	MODERATE	MISSENSE	aTt/aCt	I151T	c.452T>C	Fn1	ENSMUST00000055226	4	0.2869
B16F10 ATCC	chr17	7782479	.	T	G	NON_SYNONYMOUS_CODING	MODERATE	MISSENSE	gAg/gCg	E155A	c.464A>C	Fndc1	ENSMUST00000097425	4	0.1923
B16F10 ATCC	chr3	27465808	.	G	C	NON_SYNONYMOUS_CODING	MODERATE	MISSENSE	tgC/tgG	C561W	c.1683C>G	Fndc3b	ENSMUST00000046157	15	0.3750
B16F10 ATCC	chr3	108883500	.	T	C	NON_SYNONYMOUS_CODING	MODERATE	MISSENSE	gAg/gGg	E70G	c.209A>G	Fndc7	ENSMUST00000102620	3	0.2285
B16F10 ATCC	chr7	86725954	.	T	G	NON_SYNONYMOUS_CODING	MODERATE	MISSENSE	aAg/aCg	K608T	c.1823A>C	Folh1	ENSMUST00000001824	16	0.2605
B16F10 ATCC	chr8	121117150	.	G	C	NON_SYNONYMOUS_CODING	MODERATE	MISSENSE	cGg/cCg	R179P	c.536G>C	Foxc2	ENSMUST00000054691	1	0.2500
B16F10 ATCC	chr8	121128772	.	G	A	NON_SYNONYMOUS_CODING	MODERATE	MISSENSE	Gaa/Aaa	E271K	c.811G>A	Foxl1	ENSMUST00000181609	1	0.3171
B16F10 ATCC	chr15	77952003	.	C	T	NON_SYNONYMOUS_CODING	MODERATE	MISSENSE	Gct/Act	A385T	c.1153G>A	Foxred2	ENSMUST00000016696	5	0.1525
B16F10 ATCC	chr17	18021919	.	T	C	NON_SYNONYMOUS_CODING	MODERATE	MISSENSE	Tct/Cct	S63P	c.187T>C	Fpr-rs4	ENSMUST00000095651	1	0.2143
B16F10 ATCC	chr5	96743211	.	A	C	NON_SYNONYMOUS_CODING+SPLICE_SITE_REGION	MODERATE	MISSENSE	caA/caC	Q2866H	c.8598A>C	Fras1	ENSMUST00000036019	57	0.3556
B16F10 ATCC	chr4	82972267	.	C	T	NON_SYNONYMOUS_CODING	MODERATE	MISSENSE	Gag/Aag	E992K	c.2974G>A	Frem1	ENSMUST00000071708	16	0.1860
B16F10 ATCC	chr8	80615426	.	A	C	NON_SYNONYMOUS_CODING	MODERATE	MISSENSE	caA/caC	Q1449H	c.4347A>C	Frem3	ENSMUST00000039695	1	0.5417
B16F10 ATCC	chr12	70880678	.	A	G	NON_SYNONYMOUS_CODING	MODERATE	MISSENSE	cAg/cGg	Q144R	c.431A>G	Frmd6	ENSMUST00000057859	6	0.4309
B16F10 ATCC	chrX	50896147	.	T	G	NON_SYNONYMOUS_CODING	MODERATE	MISSENSE	aAc/aCc	N382T	c.1145A>C	Frmd7	ENSMUST00000060650	12	0.4625
B16F10 ATCC	chr4	45284080	.	C	T	NON_SYNONYMOUS_CODING	MODERATE	MISSENSE	cCt/cTt	P967L	c.2900C>T	Frmpd1	ENSMUST00000044773	16	0.2653
B16F10 ATCC	chrX	167497840	.	G	A	NON_SYNONYMOUS_CODING	MODERATE	MISSENSE	aCg/aTg	T348M	c.1043C>T	Frmpd4	ENSMUST00000112149	10	0.9800
B16F10 ATCC	chr5	73090709	.	A	C	NON_SYNONYMOUS_CODING	MODERATE	MISSENSE	Tta/Gta	L1022V	c.3064T>G	Fryl	ENSMUST00000094700	25	0.1986
B16F10 ATCC	chr5	73090738	.	A	C	NON_SYNONYMOUS_CODING	MODERATE	MISSENSE	cTc/cGc	L1012R	c.3035T>G	Fryl	ENSMUST00000094700	25	0.2381
B16F10 ATCC	chr17	55991203	.	T	A	NON_SYNONYMOUS_CODING	MODERATE	MISSENSE	cTc/cAc	L176H	c.527T>A	Fsd1	ENSMUST00000011733	7	0.3077
B16F10 ATCC	chr5	140328678	.	C	G	NON_SYNONYMOUS_CODING	MODERATE	MISSENSE	aGa/aCa	R134T	c.401G>C	Ftsj2	ENSMUST00000031536	3	0.2464
B16F10 ATCC	chr15	6658540	.	G	A	NON_SYNONYMOUS_CODING	MODERATE	MISSENSE	Gtc/Atc	V794I	c.2380G>A	Fyb	ENSMUST00000090461	16	0.2866
B16F10 ATCC	chr5	128601246	.	T	C	NON_SYNONYMOUS_CODING	MODERATE	MISSENSE	cTg/cCg	L10P	c.29T>C	Fzd10	ENSMUST00000117102	1	0.3333
B16F10 ATCC	chr1	59483870	.	G	C	NON_SYNONYMOUS_CODING	MODERATE	MISSENSE	gGc/gCc	G304A	c.911G>C	Fzd7	ENSMUST00000114246	1	0.4026
B16F10 ATCC	chr11	41971907	.	C	CA	FRAME_SHIFT	HIGH		ttt/tttT	A117fs	c.348dupT	Gabrg2	ENSMUST00000070735	4	0.2500
B16F10 ATCC	chr9	115937270	.	A	T	NON_SYNONYMOUS_CODING	MODERATE	MISSENSE	Ata/Tta	I37L	c.109A>T	Gadl1	ENSMUST00000069651	2	0.2564
B16F10 ATCC	chr11	3997984	.	C	G	NON_SYNONYMOUS_CODING	MODERATE	MISSENSE	Ccc/Gcc	P64A	c.190C>G	Gal3st1	ENSMUST00000063004	4	0.2200
B16F10 ATCC	chr11	3998532	.	C	A	NON_SYNONYMOUS_CODING	MODERATE	MISSENSE	ttC/ttA	F246L	c.738C>A	Gal3st1	ENSMUST00000063004	4	0.2143
B16F10 ATCC	chr8	122604217	.	C	A	SPLICE_SITE_REGION+INTRON	LOW				c.236-4G>T	Galns	ENSMUST00000015171	2	0.2459
B16F10 ATCC	chr11	57721331	.	G	A	NON_SYNONYMOUS_CODING	MODERATE	MISSENSE	Gga/Aga	G66R	c.196G>A	Galnt10	ENSMUST00000066987	2	0.1811
B16F10 ATCC	chr3	142630015	.	G	A	NON_SYNONYMOUS_CODING	MODERATE	MISSENSE	Gac/Aac	D159N	c.475G>A	Gbp2	ENSMUST00000165774	5	0.2533
B16F10 ATCC	chr5	105120997	.	A	T	NON_SYNONYMOUS_CODING	MODERATE	MISSENSE	tTt/tAt	F430Y	c.1289T>A	Gbp4	ENSMUST00000100962	8	0.3732
B16F10 ATCC	chr5	105094125	.	C	A	NON_SYNONYMOUS_CODING	MODERATE	MISSENSE	Ggg/Tgg	G189W	c.565G>T	Gbp9	ENSMUST00000031238	5	0.2311
B16F10 ATCC	chr13	41102792	.	C	A	NON_SYNONYMOUS_CODING	MODERATE	MISSENSE	Ggg/Tgg	G494W	c.1480G>T	Gcm2	ENSMUST00000021791	5	0.3158
B16F10 ATCC	chr13	40918639	.	C	A	NON_SYNONYMOUS_CODING	MODERATE	MISSENSE	Cca/Aca	P253T	c.757C>A	Gcnt2	ENSMUST00000067778	1	0.3439
B16F10 ATCC	chr14	33932390	.	C	T	NON_SYNONYMOUS_CODING	MODERATE	MISSENSE	Cgc/Tgc	R285C	c.853C>T	Gdf10	ENSMUST00000168727	2	0.4516
B16F10 ATCC	chr7	97966309	.	A	G	NON_SYNONYMOUS_CODING	MODERATE	MISSENSE	Agt/Ggt	S114G	c.340A>G	Gdpd4	ENSMUST00000041860	4	0.2010
B16F10 ATCC	chr15	78892021	.	C	A	NON_SYNONYMOUS_CODING	MODERATE	MISSENSE	gaC/gaA	D421E	c.1263C>A	Gga1	ENSMUST00000041587	13	0.3600
B16F10 ATCC	chr10	75608759	.	T	G	NON_SYNONYMOUS_CODING	MODERATE	MISSENSE	Ttc/Gtc	F304V	c.910T>G	Ggt5	ENSMUST00000072217	7	0.3333
B16F10 ATCC	chr15	3320981	.	T	G	SPLICE_SITE_REGION+INTRON	LOW				c.972+8A>C	Ghr	ENSMUST00000069451	10	0.2381
B16F10 ATCC	chr6	48707970	.	C	A	NON_SYNONYMOUS_CODING	MODERATE	MISSENSE	Gcc/Tcc	A61S	c.181G>T	Gimap6	ENSMUST00000053661	1	0.1777
B16F10 ATCC	chr14	57035815	.	A	C	NON_SYNONYMOUS_CODING	MODERATE	MISSENSE	Tta/Gta	L367V	c.1099T>G	Gja3	ENSMUST00000061614	2	0.3390
B16F10 ATCC	chr10	14718124	.	A	C	NON_SYNONYMOUS_CODING	MODERATE	MISSENSE	Ttc/Gtc	F9V	c.25T>G	Gje1	ENSMUST00000020016	1	0.2379
B16F10 ATCC	chr6	8573195	.	T	G	NON_SYNONYMOUS_CODING	MODERATE	MISSENSE	cTt/cGt	L228R	c.683T>G	Glcci1	ENSMUST00000064285	4	0.1333
B16F10 ATCC	chr4	107615015	.	A	G	NON_SYNONYMOUS_CODING	MODERATE	MISSENSE	aAg/aGg	K451R	c.1352A>G	Glis1	ENSMUST00000046005	5	0.2564
B16F10 ATCC	chrX	165289591	.	G	A	SPLICE_SITE_REGION+INTRON	LOW				c.270+8C>T	Glra2	ENSMUST00000058787	3	0.9677
B16F10 ATCC	chr3	80845234	.	T	G	NON_SYNONYMOUS_CODING	MODERATE	MISSENSE	aaA/aaC	K407N	c.1221A>C	Glrb	ENSMUST00000029654	10	0.2689
B16F10 ATCC	chr1	52212205	.	T	C	NON_SYNONYMOUS_CODING+SPLICE_SITE_REGION	MODERATE	MISSENSE	gAt/gGt	D331G	c.992A>G	Gls	ENSMUST00000114513	6	0.2296
B16F10 ATCC	chr19	12648009	.	A	G	NON_SYNONYMOUS_CODING	MODERATE	MISSENSE	Aca/Gca	T66A	c.196A>G	Glyat	ENSMUST00000044976	4	0.2925
B16F10 ATCC	chr5	26121278	.	T	A	NON_SYNONYMOUS_CODING	MODERATE	MISSENSE	Agg/Tgg	R25W	c.73A>T	Gm10220	ENSMUST00000088236	1	0.2320
B16F10 ATCC	chr9	26913310	.	A	C	NON_SYNONYMOUS_CODING	MODERATE	MISSENSE	Tta/Gta	L145V	c.433T>G	Gm1110	ENSMUST00000115261	5	0.1600
B16F10 ATCC	chr11	99857986	.	T	C	NON_SYNONYMOUS_CODING	MODERATE	MISSENSE	Tgc/Cgc	C6R	c.16T>C	Gm11568	ENSMUST00000107434	1	0.1472
B16F10 ATCC	chr11	104751902	.	A	C	NON_SYNONYMOUS_CODING	MODERATE	MISSENSE	aAg/aCg	K1065T	c.3194A>C	Gm11639	ENSMUST00000148007	20	0.2516
B16F10 ATCC	chr4	42851332	.	G	A	NON_SYNONYMOUS_CODING	MODERATE	MISSENSE	Ccg/Tcg	P275S	c.823C>T	Gm12429	ENSMUST00000107979	4	0.7157
B16F10 ATCC	chr4	101941491	.	A	C	NON_SYNONYMOUS_CODING	MODERATE	MISSENSE	Agt/Cgt	S220R	c.658A>C	Gm12794	ENSMUST00000052027	2	0.2522
B16F10 ATCC	chr4	101910186	.	A	C	NON_SYNONYMOUS_CODING	MODERATE	MISSENSE	Ata/Cta	I211L	c.631A>C	Gm12800	ENSMUST00000075999	2	0.2313
B16F10 ATCC	chr4	143727033	.	T	C	NON_SYNONYMOUS_CODING	MODERATE	MISSENSE	cTc/cCc	L237P	c.710T>C	Gm13078	ENSMUST00000078695	3	0.3591
B16F10 ATCC	chr4	143615232	.	C	A	NON_SYNONYMOUS_CODING	MODERATE	MISSENSE	gCa/gAa	A77E	c.230C>A	Gm13083	ENSMUST00000105773	1	0.2995
B16F10 ATCC	chr4	143698080	.	T	G	NON_SYNONYMOUS_CODING	MODERATE	MISSENSE	caA/caC	Q264H	c.792A>C	Gm13089	ENSMUST00000073532	3	0.4048
B16F10 ATCC	chr4	143965562	.	C	T	NON_SYNONYMOUS_CODING	MODERATE	MISSENSE	Gaa/Aaa	E290K	c.868G>A	Gm13101	ENSMUST00000105763	2	0.6387
B16F10 ATCC	chr4	143966626	.	GA	G	FRAME_SHIFT	HIGH		tcc/	S94fs	c.280delT	Gm13101	ENSMUST00000105763	1	0.3094
B16F10 ATCC	chr4	146536820	.	A	T	NON_SYNONYMOUS_CODING	MODERATE	MISSENSE	caA/caT	Q67H	c.201A>T	Gm13247	ENSMUST00000105735	5	0.1985
B16F10 ATCC	chr2	87656421	.	A	T	NON_SYNONYMOUS_CODING	MODERATE	MISSENSE	Tcc/Acc	S167T	c.499T>A	Gm13741	ENSMUST00000099857	2	0.2339
B16F10 ATCC	chr2	87656877	.	A	C	NON_SYNONYMOUS_CODING	MODERATE	MISSENSE	Tta/Gta	L15V	c.43T>G	Gm13741	ENSMUST00000099857	2	0.2474
B16F10 ATCC	chrX	3700759	.	T	C	NON_SYNONYMOUS_CODING	MODERATE	MISSENSE	Ttt/Ctt	F148L	c.442T>C	Gm14345	ENSMUST00000105019	1	0.1318
B16F10 ATCC	chrX	148695496	.	A	G	NON_SYNONYMOUS_CODING	MODERATE	MISSENSE	Aca/Gca	T415A	c.1243A>G	Gm15127	ENSMUST00000101186	5	0.5944
B16F10 ATCC	chr6	129772463	.	T	C	SPLICE_SITE_ACCEPTOR+INTRON	HIGH				c.170-2A>G	Gm156	ENSMUST00000095409	2	0.3291
B16F10 ATCC	chr5	121295503	.	A	T	SPLICE_SITE_REGION+INTRON	LOW				c.2876+4A>T	Gm15800	ENSMUST00000042614	18	0.3158
B16F10 ATCC	chr4	117213795	.	C	T	NON_SYNONYMOUS_CODING	MODERATE	MISSENSE	Gac/Aac	D378N	c.1132G>A	Gm1661	ENSMUST00000165128	12	0.2308
B16F10 ATCC	chr5	15032997	.	C	T	START_GAINED	LOW				c.-59G>A	Gm17019	ENSMUST00000167908	1	0.1798
B16F10 ATCC	chr9	36582634	.	AT	A	FRAME_SHIFT+START_LOST	HIGH		atg/	M1fs	c.1delA	Gm17689	ENSMUST00000170030	1	0.5000
B16F10 ATCC	chr12	87876934	.	A	C	NON_SYNONYMOUS_CODING	MODERATE	MISSENSE	gAa/gCa	E117A	c.350A>C	Gm2016	ENSMUST00000110147	2	0.1765
B16F10 ATCC	chr2	167644864	.	G	C	STOP_GAINED	HIGH	NONSENSE	taC/taG	Y198*	c.594C>G	Gm20431	ENSMUST00000125544	5	0.2083
B16F10 ATCC	chr12	111485172	.	C	G	NON_SYNONYMOUS_CODING	MODERATE	MISSENSE	gGc/gCc	G200A	c.599G>C	Gm266	ENSMUST00000010673	1	0.3220
B16F10 ATCC	chr12	111485337	.	T	C	NON_SYNONYMOUS_CODING	MODERATE	MISSENSE	gAg/gGg	E145G	c.434A>G	Gm266	ENSMUST00000010673	1	0.3770
B16F10 ATCC	chr10	127788833	.	A	C	NON_SYNONYMOUS_CODING	MODERATE	MISSENSE	aAg/aCg	K180T	c.539A>C	Gm28046	ENSMUST00000128247	2	0.3005
B16F10 ATCC	chrX	33657415	.	T	C	NON_SYNONYMOUS_CODING	MODERATE	MISSENSE	cTc/cCc	L64P	c.191T>C	Gm2927	ENSMUST00000177912	1	0.1367
B16F10 ATCC	chrX	57488638	.	A	C	NON_SYNONYMOUS_CODING	MODERATE	MISSENSE	Ata/Cta	I668L	c.2002A>C	Gm364	ENSMUST00000114725	17	0.4512
B16F10 ATCC	chr14	11281513	.	A	C	NON_SYNONYMOUS_CODING	MODERATE	MISSENSE	Tca/Gca	S141A	c.421T>G	Gm3839	ENSMUST00000181173	4	0.1962
B16F10 ATCC	chr12	81377699	.	T	C	NON_SYNONYMOUS_CODING	MODERATE	MISSENSE	Agc/Ggc	S562G	c.1684A>G	Gm4787	ENSMUST00000062182	1	0.1894
B16F10 ATCC	chr1	139754261	.	T	A	NON_SYNONYMOUS_CODING	MODERATE	MISSENSE	cAa/cTa	Q199L	c.596A>T	Gm4788	ENSMUST00000111989	4	0.2547
B16F10 ATCC	chr7	41042876	.	A	G	NON_SYNONYMOUS_CODING	MODERATE	MISSENSE	Aac/Gac	N90D	c.268A>G	Gm4884	ENSMUST00000164422	3	0.2617
B16F10 ATCC	chr10	58235911	.	T	G	NON_SYNONYMOUS_CODING	MODERATE	MISSENSE	gaA/gaC	E160D	c.480A>C	Gm4981	ENSMUST00000099726	1	0.2680
B16F10 ATCC	chr7	39408447	.	T	C	NON_SYNONYMOUS_CODING	MODERATE	MISSENSE	Aaa/Gaa	K583E	c.1747A>G	Gm5114	ENSMUST00000108017	3	0.2500
B16F10 ATCC	chr5	10243130	.	T	C	NON_SYNONYMOUS_CODING	MODERATE	MISSENSE	Aat/Gat	N149D	c.445A>G	Gm5152	ENSMUST00000081735	4	0.2753
B16F10 ATCC	chr7	17904922	.	A	C	NON_SYNONYMOUS_CODING	MODERATE	MISSENSE	aaA/aaC	K281N	c.843A>C	Gm5155	ENSMUST00000072381	4	0.2063
B16F10 ATCC	chr6	131181498	.	G	T	NON_SYNONYMOUS_CODING	MODERATE	MISSENSE	aCt/aAt	T9N	c.26C>A	Gm5581	ENSMUST00000072940	2	0.1453
B16F10 ATCC	chr7	38522504	.	G	T	NON_SYNONYMOUS_CODING	MODERATE	MISSENSE	gCa/gAa	A47E	c.140C>A	Gm5591	ENSMUST00000079759	2	0.1814
B16F10 ATCC	chr1	94008145	.	A	G	NON_SYNONYMOUS_CODING	MODERATE	MISSENSE	cAc/cGc	H73R	c.218A>G	Gm6086	ENSMUST00000097632	7	0.2121
B16F10 ATCC	chr1	94009509	.	C	A	NON_SYNONYMOUS_CODING	MODERATE	MISSENSE	cCa/cAa	P392Q	c.1175C>A	Gm6086	ENSMUST00000097632	8	0.1149
B16F10 ATCC	chr5	94683833	.	C	A	NON_SYNONYMOUS_CODING	MODERATE	MISSENSE	gCa/gAa	A233E	c.698C>A	Gm6205	ENSMUST00000165424	2	0.1426
B16F10 ATCC	chr14	44724865	.	T	C	NON_SYNONYMOUS_CODING	MODERATE	MISSENSE	Aaa/Gaa	K33E	c.97A>G	Gm8267	ENSMUST00000165003	1	0.3223
B16F10 ATCC	chr12	87517246	.	A	G	NON_SYNONYMOUS_CODING	MODERATE	MISSENSE	gAa/gGa	E117G	c.350A>G	Gm8300	ENSMUST00000110152	2	0.1514
B16F10 ATCC	chr13	50701526	.	A	G	NON_SYNONYMOUS_CODING	MODERATE	MISSENSE	aAg/aGg	K400R	c.1199A>G	Gm8765	ENSMUST00000099518	4	0.4589
B16F10 ATCC	chr6	132362042	.	C	T	NON_SYNONYMOUS_CODING	MODERATE	MISSENSE	gGc/gAc	G71D	c.212G>A	Gm8882	ENSMUST00000080849	3	0.1364
B16F10 ATCC	chr13	50645262	.	A	C	NON_SYNONYMOUS_CODING	MODERATE	MISSENSE	Aaa/Caa	K86Q	c.256A>C	Gm904	ENSMUST00000099519	3	0.6684
B16F10 ATCC	chr14	42294752	.	G	A	NON_SYNONYMOUS_CODING	MODERATE	MISSENSE	Ctt/Ttt	L114F	c.340C>T	Gm9611	ENSMUST00000169972	3	0.2553
B16F10 ATCC	chr3	92429090	.	A	G	NON_SYNONYMOUS_CODING	MODERATE	MISSENSE	Tcc/Ccc	S102P	c.304T>C	Gm9774	ENSMUST00000192538	1	0.1951
B16F10 ATCC	chr11	79296408	.	T	C	NON_SYNONYMOUS_CODING	MODERATE	MISSENSE	gAg/gGg	E71G	c.212A>G	Gm9964	ENSMUST00000068448	1	0.4556
B16F10 ATCC	chr18	67191403	.	G	A	NON_SYNONYMOUS_CODING	MODERATE	MISSENSE	Gat/Aat	D210N	c.628G>A	Gnal	ENSMUST00000025402	5	0.2448
B16F10 ATCC	chr2	174298373	.	A	G	NON_SYNONYMOUS_CODING	MODERATE	MISSENSE	gAg/gGg	E171G	c.512A>G	Gnas	ENSMUST00000080493	1	0.4630
B16F10 ATCC	chr5	18015323	.	A	C	NON_SYNONYMOUS_CODING	MODERATE	MISSENSE	Agt/Cgt	S228R	c.682A>C	Gnat3	ENSMUST00000030561	6	0.2288
B16F10 ATCC	chr16	36919742	.	A	C	NON_SYNONYMOUS_CODING	MODERATE	MISSENSE	gaA/gaC	E2855D	c.8565A>C	Golgb1	ENSMUST00000039855	13	0.2537
B16F10 ATCC	chr6	142394003	.	G	A	NON_SYNONYMOUS_CODING	MODERATE	MISSENSE	Gtg/Atg	V65M	c.193G>A	Golt1b	ENSMUST00000032372	3	0.1348
B16F10 ATCC	chr1	163386323	.	C	G	NON_SYNONYMOUS_CODING	MODERATE	MISSENSE	aGt/aCt	S346T	c.1037G>C	Gorab	ENSMUST00000045138	5	0.2245
B16F10 ATCC	chr1	163403550	.	C	A	STOP_GAINED	HIGH	NONSENSE	Gag/Tag	E12*	c.34G>T	Gorab	ENSMUST00000045138	1	0.2739
B16F10 ATCC	chr15	76332542	.	A	G	NON_SYNONYMOUS_CODING	MODERATE	MISSENSE	gAg/gGg	E142G	c.425A>G	Gpaa1	ENSMUST00000023221	4	0.2794
B16F10 ATCC	chr3	88055056	.	G	C	NON_SYNONYMOUS_CODING	MODERATE	MISSENSE	gGc/gCc	G192A	c.575G>C	Gpatch4	ENSMUST00000029707	8	0.2404
B16F10 ATCC	chr11	102480945	.	T	A	NON_SYNONYMOUS_CODING	MODERATE	MISSENSE	aAa/aTa	K589I	c.1766A>T	Gpatch8	ENSMUST00000143842	8	0.1864
B16F10 ATCC	chr12	75415807	.	A	C	NON_SYNONYMOUS_CODING	MODERATE	MISSENSE	Ttg/Gtg	L3V	c.7T>G	Gphb5	ENSMUST00000051079	2	0.3690
B16F10 ATCC	chr5	30199120	.	T	G	NON_SYNONYMOUS_CODING	MODERATE	MISSENSE	aAg/aCg	K378T	c.1133A>C	Gpr113	ENSMUST00000088117	8	0.2759
B16F10 ATCC	chr17	43451199	.	A	C	SPLICE_SITE_REGION+INTRON	LOW				c.3780+4A>C	Gpr116	ENSMUST00000113599	17	0.3115
B16F10 ATCC	chr7	131984094	.	AC	A	FRAME_SHIFT	HIGH		ctc/	L265fs	c.793delC	Gpr26	ENSMUST00000045840	3	0.2128
B16F10 ATCC	chr6	25669456	.	C	A	NON_SYNONYMOUS_CODING	MODERATE	MISSENSE	aGt/aTt	S463I	c.1388G>T	Gpr37	ENSMUST00000054867	2	0.1457
B16F10 ATCC	chr11	30891139	.	T	G	NON_SYNONYMOUS_CODING	MODERATE	MISSENSE	Ttg/Gtg	L15V	c.43T>G	Gpr75	ENSMUST00000109430	2	0.2447
B16F10 ATCC	chr13	81476672	.	G	A	NON_SYNONYMOUS_CODING	MODERATE	MISSENSE	cCg/cTg	P3726L	c.11177C>T	Gpr98	ENSMUST00000095585	54	0.2564
B16F10 ATCC	chrX	135799441	.	G	T	NON_SYNONYMOUS_CODING	MODERATE	MISSENSE	Gct/Tct	A128S	c.382G>T	Gprasp1	ENSMUST00000113144	11	0.9630
B16F10 ATCC	chr3	108682002	.	T	C	SPLICE_SITE_REGION+INTRON	LOW				c.1815+4A>G	Gpsm2	ENSMUST00000029482	14	0.2083
B16F10 ATCC	chr3	108700760	.	T	C	NON_SYNONYMOUS_CODING	MODERATE	MISSENSE	gAg/gGg	E234G	c.701A>G	Gpsm2	ENSMUST00000029482	7	0.1648
B16F10 ATCC	chr14	35452294	.	G	A	NON_SYNONYMOUS_CODING	MODERATE	MISSENSE	cGc/cAc	R631H	c.1892G>A	Grid1	ENSMUST00000043349	12	0.3804
B16F10 ATCC	chr5	9570183	.	A	C	NON_SYNONYMOUS_CODING	MODERATE	MISSENSE	Ttc/Gtc	F354V	c.1060T>G	Grm3	ENSMUST00000004076	3	0.2766
B16F10 ATCC	chr5	36470614	.	C	T	NON_SYNONYMOUS_CODING	MODERATE	MISSENSE	Cgt/Tgt	R80C	c.238C>T	Grpel1	ENSMUST00000031099	3	0.1741
B16F10 ATCC	chr5	21196060	.	G	A	NON_SYNONYMOUS_CODING	MODERATE	MISSENSE	Gct/Act	A64T	c.190G>A	Gsap	ENSMUST00000036031	3	0.1861
B16F10 ATCC	chr15	75863474	.	T	G	NON_SYNONYMOUS_CODING	MODERATE	MISSENSE	gaT/gaG	D22E	c.66T>G	Gsdmd	ENSMUST00000023238	2	0.4250
B16F10 ATCC	chr14	75897623	.	C	T	NON_SYNONYMOUS_CODING	MODERATE	MISSENSE	Ggc/Agc	G221S	c.661G>A	Gtf2f2	ENSMUST00000088922	8	0.3846
B16F10 ATCC	chr6	136737379	.	T	C	NON_SYNONYMOUS_CODING	MODERATE	MISSENSE	gAg/gGg	E483G	c.1448A>G	Gucy2c	ENSMUST00000032338	12	0.1429
B16F10 ATCC	chr6	136743981	.	G	A	NON_SYNONYMOUS_CODING	MODERATE	MISSENSE	cCg/cTg	P406L	c.1217C>T	Gucy2c	ENSMUST00000032338	10	0.1471
B16F10 ATCC	chr11	69224739	.	G	C	NON_SYNONYMOUS_CODING	MODERATE	MISSENSE	gaC/gaG	D910E	c.2730C>G	Gucy2e	ENSMUST00000021259	14	0.1834
B16F10 ATCC	chr5	69563077	.	A	T	SPLICE_SITE_REGION+INTRON	LOW				c.885-6A>T	Guf1	ENSMUST00000087228	8	0.2887
B16F10 ATCC	chr18	52694165	.	T	A	STOP_GAINED	HIGH	NONSENSE	taT/taA	Y148*	c.444T>A	Gykl1	ENSMUST00000066193	1	0.4278
B16F10 ATCC	chr17	35379653	.	A	G	NON_SYNONYMOUS_CODING	MODERATE	MISSENSE	Aca/Gca	T4A	c.10A>G	H2-Q4	ENSMUST00000081435	1	0.1828
B16F10 ATCC	chr17	36041638	.	G	A	NON_SYNONYMOUS_CODING	MODERATE	MISSENSE	Cgg/Tgg	R132W	c.394C>T	H2-T22	ENSMUST00000077960	4	0.3005
B16F10 ATCC	chr3	98875352	.	A	C	NON_SYNONYMOUS_CODING	MODERATE	MISSENSE	gTt/gGt	V340G	c.1019T>G	Hao2	ENSMUST00000029464	9	0.1926
B16F10 ATCC	chr13	89601498	.	A	G	NON_SYNONYMOUS_CODING	MODERATE	MISSENSE	cAc/cGc	H54R	c.161A>G	Hapln1	ENSMUST00000022108	3	0.2752
B16F10 ATCC	chr4	86602874	.	A	C	NON_SYNONYMOUS_CODING	MODERATE	MISSENSE	Tta/Gta	L176V	c.526T>G	Haus6	ENSMUST00000070607	5	0.7333
B16F10 ATCC	chr11	46751229	.	A	C	SPLICE_SITE_REGION+INTRON	LOW				c.49+4A>C	Havcr1	ENSMUST00000047568	1	0.2189
B16F10 ATCC	chr2	35008249	.	T	G	NON_SYNONYMOUS_CODING	MODERATE	MISSENSE	Act/Cct	T1145P	c.3433A>C	Hc	ENSMUST00000028233	27	0.2391
B16F10 ATCC	chr2	35029470	.	T	A	NON_SYNONYMOUS_CODING	MODERATE	MISSENSE	gAc/gTc	D668V	c.2003A>T	Hc	ENSMUST00000028233	16	0.4800
B16F10 ATCC	chrX	169313612	.	C	G	NON_SYNONYMOUS_CODING	MODERATE	MISSENSE	aGa/aCa	R199T	c.596G>C	Hccs	ENSMUST00000033717	6	0.9867
B16F10 ATCC	chr2	153150939	.	T	C	SPLICE_SITE_REGION+INTRON	LOW				c.1373-8T>C	Hck	ENSMUST00000003370	12	0.2647
B16F10 ATCC	chr12	34407789	.	T	G	NON_SYNONYMOUS_CODING	MODERATE	MISSENSE	aAg/aCg	K255T	c.764A>C	Hdac9	ENSMUST00000110819	7	0.4884
B16F10 ATCC	chr12	51891404	.	G	A	NON_SYNONYMOUS_CODING	MODERATE	MISSENSE	gCc/gTc	A1497V	c.4490C>T	Heatr5a	ENSMUST00000040583	29	0.2797
B16F10 ATCC	chr12	51951076	.	T	C	NON_SYNONYMOUS_CODING	MODERATE	MISSENSE	Aca/Gca	T347A	c.1039A>G	Heatr5a	ENSMUST00000040583	8	0.5000
B16F10 ATCC	chr1	53832634	.	T	G	NON_SYNONYMOUS_CODING	MODERATE	MISSENSE	gaA/gaC	E1384D	c.4152A>C	Hecw2	ENSMUST00000087659	24	0.1429
B16F10 ATCC	chrX	96466031	.	T	A	NON_SYNONYMOUS_CODING	MODERATE	MISSENSE	gTt/gAt	V130D	c.389T>A	Heph	ENSMUST00000033553	4	0.3784
B16F10 ATCC	chr9	15053721	.	A	T	NON_SYNONYMOUS_CODING	MODERATE	MISSENSE	cTt/cAt	L1126H	c.3377T>A	Hephl1	ENSMUST00000159985	20	0.2000
B16F10 ATCC	chr7	56087341	.	G	A	NON_SYNONYMOUS_CODING+SPLICE_SITE_REGION	MODERATE	MISSENSE	Gcc/Acc	A183T	c.547G>A	Herc2	ENSMUST00000076226	6	0.5170
B16F10 ATCC	chr7	56215381	.	T	G	NON_SYNONYMOUS_CODING	MODERATE	MISSENSE	gTt/gGt	V4202G	c.12605T>G	Herc2	ENSMUST00000076226	82	0.2800
B16F10 ATCC	chr7	56215432	.	C	A	NON_SYNONYMOUS_CODING	MODERATE	MISSENSE	gCt/gAt	A4219D	c.12656C>A	Herc2	ENSMUST00000076226	82	0.3266
B16F10 ATCC	chr7	56226589	.	G	T	NON_SYNONYMOUS_CODING	MODERATE	MISSENSE	tGt/tTt	C4450F	c.13349G>T	Herc2	ENSMUST00000076226	87	0.3363
B16F10 ATCC	chr6	57652088	.	A	C	NON_SYNONYMOUS_CODING	MODERATE	MISSENSE	aaA/aaC	K661N	c.1983A>C	Herc6	ENSMUST00000031817	16	0.1218
B16F10 ATCC	chr6	57662756	.	G	A	NON_SYNONYMOUS_CODING	MODERATE	MISSENSE	Gta/Ata	V952I	c.2854G>A	Herc6	ENSMUST00000031817	23	0.1117
B16F10 ATCC	chr6	57662853	.	G	T	NON_SYNONYMOUS_CODING	MODERATE	MISSENSE	aGg/aTg	R984M	c.2951G>T	Herc6	ENSMUST00000031817	23	0.1300
B16F10 ATCC	chr4	123240181	.	GGAA	G	CODON_DELETION	MODERATE		aag/	K46del	c.136_138delAAG	Heyl	ENSMUST00000040821	2	1.0000
B16F10 ATCC	chr5	16618919	.	C	T	NON_SYNONYMOUS_CODING	MODERATE	MISSENSE	Cgt/Tgt	R705C	c.2113C>T	Hgf	ENSMUST00000030683	19	0.2500
B16F10 ATCC	chr8	79990373	.	GA	G	SPLICE_SITE_REGION+INTRON	LOW				c.1424-5delT	Hhip	ENSMUST00000079038	8	0.2020
B16F10 ATCC	chr5	123999132	.	A	T	SPLICE_SITE_REGION+INTRON	LOW				c.2050+4A>T	Hip1r	ENSMUST00000000939	20	0.2162
B16F10 ATCC	chr3	103764544	.	T	C	NON_SYNONYMOUS_CODING	MODERATE	MISSENSE	gAg/gGg	E413G	c.1238A>G	Hipk1	ENSMUST00000029438	4	0.3934
B16F10 ATCC	chr2	104434629	.	G	A	NON_SYNONYMOUS_CODING	MODERATE	MISSENSE	tCt/tTt	S702F	c.2105C>T	Hipk3	ENSMUST00000111125	10	0.3171
B16F10 ATCC	chr1	150648937	.	G	T	NON_SYNONYMOUS_CODING	MODERATE	MISSENSE	gCc/gAc	A3414D	c.10241C>A	Hmcn1	ENSMUST00000074783	67	0.1518
B16F10 ATCC	chr2	31381067	.	G	T	NON_SYNONYMOUS_CODING	MODERATE	MISSENSE	gaG/gaT	E1252D	c.3756G>T	Hmcn2	ENSMUST00000113532	25	0.1875
B16F10 ATCC	chr10	81346573	.	C	G	NON_SYNONYMOUS_CODING	MODERATE	MISSENSE	Gcg/Ccg	A310P	c.928G>C	Hmg20b	ENSMUST00000020454	8	1.0000
B16F10 ATCC	chr11	51601746	.	T	G	SPLICE_SITE_REGION+INTRON	LOW				c.928+4A>C	Hnrnpab	ENSMUST00000109103	7	0.4643
B16F10 ATCC	chr6	52206545	.	G	C	NON_SYNONYMOUS_CODING	MODERATE	MISSENSE	ttC/ttG	F173L	c.519C>G	Hoxa6	ENSMUST00000062829	2	0.1469
B16F10 ATCC	chr15	103034763	.	A	T	NON_SYNONYMOUS_CODING	MODERATE	MISSENSE	gAt/gTt	D14V	c.41A>T	Hoxc4	ENSMUST00000100164	1	0.2344
B16F10 ATCC	chr4	116820833	.	G	C	NON_SYNONYMOUS_CODING	MODERATE	MISSENSE	Ccc/Gcc	P144A	c.430C>G	Hpdl	ENSMUST00000055436	1	0.6000
B16F10 ATCC	chr3	98742222	.	G	T	NON_SYNONYMOUS_CODING	MODERATE	MISSENSE	Cac/Aac	H262N	c.784C>A	Hsd3b3	ENSMUST00000090743	3	0.2166
B16F10 ATCC	chr3	98806332	.	T	G	NON_SYNONYMOUS_CODING	MODERATE	MISSENSE	aAa/aCa	K217T	c.650A>C	Hsd3b6	ENSMUST00000029463	4	0.2570
B16F10 ATCC	chr10	57496168	.	A	T	NON_SYNONYMOUS_CODING	MODERATE	MISSENSE	aaA/aaT	K72N	c.216A>T	Hsf2	ENSMUST00000079833	3	0.2536
B16F10 ATCC	chr16	75758185	.	C	T	NON_SYNONYMOUS_CODING	MODERATE	MISSENSE	Ggt/Agt	G338S	c.1012G>A	Hspa13	ENSMUST00000046283	5	0.4453
B16F10 ATCC	chr3	40766993	.	C	G	STOP_GAINED	HIGH	NONSENSE	tCa/tGa	S282*	c.845C>G	Hspa4l	ENSMUST00000077083	7	0.2105
B16F10 ATCC	chr8	110299973	.	A	G	NON_SYNONYMOUS_CODING	MODERATE	MISSENSE	Aaa/Gaa	K108E	c.322A>G	Hydin	ENSMUST00000043141	4	0.3030
B16F10 ATCC	chr8	110586048	.	G	T	NON_SYNONYMOUS_CODING	MODERATE	MISSENSE	aaG/aaT	K4140N	c.12420G>T	Hydin	ENSMUST00000043141	74	0.4805
B16F10 ATCC	chr8	110592791	.	AG	A	FRAME_SHIFT	HIGH		ggc/	G4443fs	c.13328delG	Hydin	ENSMUST00000043141	78	0.1852
B16F10 ATCC	chr3	105927213	.	C	A	NON_SYNONYMOUS_CODING	MODERATE	MISSENSE	Gct/Tct	A42S	c.124G>T	I830077J02Rik	ENSMUST00000098758	4	0.1859
B16F10 ATCC	chr13	49721088	.	G	A	NON_SYNONYMOUS_CODING	MODERATE	MISSENSE	aGt/aAt	S746N	c.2237G>A	Iars	ENSMUST00000047363	22	0.3778
B16F10 ATCC	chr19	34587125	.	T	G	NON_SYNONYMOUS_CODING	MODERATE	MISSENSE	Tta/Gta	L24V	c.70T>G	Ifit3	ENSMUST00000102825	2	0.1441
B16F10 ATCC	chr4	88676378	.	C	A	NON_SYNONYMOUS_CODING	MODERATE	MISSENSE	aGc/aTc	S160I	c.479G>T	Ifna16	ENSMUST00000105148	1	0.2227
B16F10 ATCC	chr10	19606424	.	A	C	SPLICE_SITE_REGION+INTRON	LOW				c.757+4A>C	Ifngr1	ENSMUST00000020188	5	0.4552
B16F10 ATCC	chr2	163023358	.	A	C	NON_SYNONYMOUS_CODING	MODERATE	MISSENSE	gAt/gCt	D43A	c.128A>C	Ift52	ENSMUST00000018002	3	0.1815
B16F10 ATCC	chr12	113307253	.	T	C	SPLICE_SITE_REGION+INTRON	LOW				c.355+8A>G	Ighg2b	ENSMUST00000103418	2	0.1992
B16F10 ATCC	chr12	114048313	.	T	C	NON_SYNONYMOUS_CODING	MODERATE	MISSENSE	gAc/gGc	D94G	c.281A>G	Ighv11-2	ENSMUST00000103468	2	0.1929
B16F10 ATCC	chr12	114682736	.	A	C	NON_SYNONYMOUS_CODING	MODERATE	MISSENSE	Ttc/Gtc	F83V	c.247T>G	Ighv1-18	ENSMUST00000194350	2	0.1564
B16F10 ATCC	chr12	114357815	.	G	T	STOP_GAINED	HIGH	NONSENSE	taC/taA	Y101*	c.303C>A	Ighv13-1	ENSMUST00000125484	2	0.2179
B16F10 ATCC	chr12	114896624	.	A	T	SPLICE_SITE_DONOR+INTRON	HIGH				c.46+2T>A	Ighv1-37	ENSMUST00000193950	1	0.3023
B16F10 ATCC	chr12	115119933	.	C	T	NON_SYNONYMOUS_CODING	MODERATE	MISSENSE	Gta/Ata	V56I	c.166G>A	Ighv1-50	ENSMUST00000103521	2	0.1877
B16F10 ATCC	chr12	114564804	.	T	G	NON_SYNONYMOUS_CODING	MODERATE	MISSENSE	gAt/gCt	D43A	c.128A>C	Ighv15-2	ENSMUST00000195337	2	0.3125
B16F10 ATCC	chr12	114253678	.	A	T	NON_SYNONYMOUS_CODING	MODERATE	MISSENSE	Tta/Ata	L98I	c.292T>A	Ighv3-4	ENSMUST00000193408	2	0.1429
B16F10 ATCC	chr12	113736120	.	C	G	NON_SYNONYMOUS_CODING	MODERATE	MISSENSE	tGt/tCt	C124S	c.371G>C	Ighv5-9-1	ENSMUST00000192264	2	0.3115
B16F10 ATCC	chr12	114222897	.	A	C	NON_SYNONYMOUS_CODING	MODERATE	MISSENSE	gTt/gGt	V85G	c.254T>G	Ighv7-4	ENSMUST00000192499	2	0.3158
B16F10 ATCC	chr3	59329938	.	C	T	NON_SYNONYMOUS_CODING	MODERATE	MISSENSE	Gtc/Atc	V941I	c.2821G>A	Igsf10	ENSMUST00000039419	5	0.1976
B16F10 ATCC	chr18	36744782	.	C	T	STOP_GAINED	HIGH	NONSENSE	Cga/Tga	R4*	c.10C>T	Ik	ENSMUST00000007042	1	0.3593
B16F10 ATCC	chr7	4775999	.	G	A	NON_SYNONYMOUS_CODING	MODERATE	MISSENSE	tCc/tTc	S103F	c.308C>T	Il11	ENSMUST00000094892	4	0.1609
B16F10 ATCC	chrX	36168806	.	C	T	SPLICE_SITE_REGION+INTRON	LOW				c.1183-8C>T	Il13ra1	ENSMUST00000033418	10	0.4333
B16F10 ATCC	chr1	40474751	.	A	C	NON_SYNONYMOUS_CODING	MODERATE	MISSENSE	aAg/aCg	K39T	c.116A>C	Il18r1	ENSMUST00000087983	3	0.1832
B16F10 ATCC	chr1	40478486	.	C	A	NON_SYNONYMOUS_CODING	MODERATE	MISSENSE	tCt/tAt	S136Y	c.407C>A	Il18r1	ENSMUST00000087983	4	0.3750
B16F10 ATCC	chr1	40548780	.	T	G	NON_SYNONYMOUS_CODING	MODERATE	MISSENSE	Ttc/Gtc	F513V	c.1537T>G	Il18rap	ENSMUST00000027237	13	0.1195
B16F10 ATCC	chr10	19743042	.	A	C	SPLICE_SITE_REGION+INTRON	LOW				c.233+4A>C	Il20ra	ENSMUST00000020185	2	0.3258
B16F10 ATCC	chr14	14351129	.	G	A	NON_SYNONYMOUS_CODING	MODERATE	MISSENSE	cGg/cAg	R310Q	c.929G>A	Il3ra	ENSMUST00000090591	9	0.3333
B16F10 ATCC	chr8	82068931	.	G	A	SPLICE_SITE_ACCEPTOR+INTRON	HIGH				c.2384-1G>A	Inpp4b	ENSMUST00000109852	22	0.3108
B16F10 ATCC	chr7	128694949	.	C	G	NON_SYNONYMOUS_CODING	MODERATE	MISSENSE	aCg/aGg	T1008R	c.3023C>G	Inpp5f	ENSMUST00000043138	20	0.5000
B16F10 ATCC	chr4	117904680	.	T	C	NON_SYNONYMOUS_CODING	MODERATE	MISSENSE	gAg/gGg	E441G	c.1322A>G	Ipo13	ENSMUST00000036156	6	0.3488
B16F10 ATCC	chr2	155209222	.	A	C	SPLICE_SITE_REGION+INTRON	LOW				c.1824+4A>C	Itch	ENSMUST00000029126	18	0.4818
B16F10 ATCC	chr8	85780584	.	G	A	SPLICE_SITE_REGION+INTRON	LOW				c.653-7C>T	Itfg1	ENSMUST00000034140	6	0.2166
B16F10 ATCC	chr13	114857332	.	G	A	NON_SYNONYMOUS_CODING	MODERATE	MISSENSE	Cca/Tca	P762S	c.2284C>T	Itga2	ENSMUST00000056117	18	0.3034
B16F10 ATCC	chr10	128949163	.	T	A	NON_SYNONYMOUS_CODING+SPLICE_SITE_REGION	MODERATE	MISSENSE	aTc/aAc	I787N	c.2360T>A	Itga7	ENSMUST00000099112	18	0.2500
B16F10 ATCC	chr2	60620211	.	C	T	NON_SYNONYMOUS_CODING+SPLICE_SITE_REGION	MODERATE	MISSENSE	cGg/cAg	R628Q	c.1883G>A	Itgb6	ENSMUST00000028348	14	0.3846
B16F10 ATCC	chr17	27113528	.	C	T	NON_SYNONYMOUS_CODING	MODERATE	MISSENSE	tCg/tTg	S1782L	c.5345C>T	Itpr3	ENSMUST00000049308	40	0.3537
B16F10 ATCC	chr12	4712472	.	A	C	NON_SYNONYMOUS_CODING	MODERATE	MISSENSE	Agt/Cgt	S1551R	c.4651A>C	Itsn2	ENSMUST00000062580	38	0.3214
B16F10 ATCC	chr4	92146933	.	C	T	NON_SYNONYMOUS_CODING	MODERATE	MISSENSE	Gcc/Acc	A16T	c.46G>A	Izumo3	ENSMUST00000107108	1	0.1579
B16F10 ATCC	chr2	137085151	.	C	A	NON_SYNONYMOUS_CODING	MODERATE	MISSENSE	tGg/tTg	W896L	c.2687G>T	Jag1	ENSMUST00000028735	23	0.2254
B16F10 ATCC	chr8	71680757	.	C	A	NON_SYNONYMOUS_CODING	MODERATE	MISSENSE	Ctg/Atg	L365M	c.1093C>A	Jak3	ENSMUST00000051995	8	0.1471
B16F10 ATCC	chr5	37120986	.	A	T	NON_SYNONYMOUS_CODING	MODERATE	MISSENSE	Atc/Ttc	I536F	c.1606A>T	Jakmip1	ENSMUST00000121010	10	0.2966
B16F10 ATCC	chr13	93441081	.	T	A	NON_SYNONYMOUS_CODING	MODERATE	MISSENSE	Agc/Tgc	S860C	c.2578A>T	Jmy	ENSMUST00000065537	9	0.2174
B16F10 ATCC	chr1	17091441	.	T	A	NON_SYNONYMOUS_CODING	MODERATE	MISSENSE	aaA/aaT	K332N	c.996A>T	Jph1	ENSMUST00000038382	2	0.1787
B16F10 ATCC	chr2	163397332	.	G	C	NON_SYNONYMOUS_CODING	MODERATE	MISSENSE	agC/agG	S65R	c.195C>G	Jph2	ENSMUST00000017961	1	0.7568
B16F10 ATCC	chr8	22935501	.	C	T	STOP_GAINED	HIGH	NONSENSE	Cga/Tga	R1021*	c.3061C>T	Kat6a	ENSMUST00000044331	17	0.1895
B16F10 ATCC	chr8	15027839	.	C	G	NON_SYNONYMOUS_CODING	MODERATE	MISSENSE	cCc/cGc	P146R	c.437C>G	Kbtbd11	ENSMUST00000069399	2	0.3529
B16F10 ATCC	chr3	107036953	.	C	A	NON_SYNONYMOUS_CODING	MODERATE	MISSENSE	ttC/ttA	F177L	c.531C>A	Kcna3	ENSMUST00000052718	1	0.2533
B16F10 ATCC	chr7	45406959	.	T	G	NON_SYNONYMOUS_CODING	MODERATE	MISSENSE	Ttc/Gtc	F200V	c.598T>G	Kcna7	ENSMUST00000107774	1	0.5000
B16F10 ATCC	chr7	45409105	.	A	T	NON_SYNONYMOUS_CODING	MODERATE	MISSENSE	aAg/aTg	K272M	c.815A>T	Kcna7	ENSMUST00000107774	2	0.4545
B16F10 ATCC	chr3	65302199	.	T	A	SPLICE_SITE_REGION+INTRON	LOW				c.473+7T>A	Kcnab1	ENSMUST00000049230	6	0.2136
B16F10 ATCC	chr2	167188061	.	G	C	NON_SYNONYMOUS_CODING	MODERATE	MISSENSE	gCc/gGc	A188G	c.563C>G	Kcnb1	ENSMUST00000059826	1	0.5625
B16F10 ATCC	chr1	15710091	.	A	C	NON_SYNONYMOUS_CODING	MODERATE	MISSENSE	Att/Ctt	I396L	c.1186A>C	Kcnb2	ENSMUST00000170146	2	0.2374
B16F10 ATCC	chr1	15711028	.	C	T	NON_SYNONYMOUS_CODING	MODERATE	MISSENSE	tCa/tTa	S708L	c.2123C>T	Kcnb2	ENSMUST00000170146	2	0.2281
B16F10 ATCC	chr12	74965295	.	A	C	NON_SYNONYMOUS_CODING	MODERATE	MISSENSE	Ttc/Gtc	F617V	c.1849T>G	Kcnh5	ENSMUST00000042299	10	0.2037
B16F10 ATCC	chr11	106009048	.	T	G	NON_SYNONYMOUS_CODING	MODERATE	MISSENSE	Ttc/Gtc	F48V	c.142T>G	Kcnh6	ENSMUST00000001965	2	0.5385
B16F10 ATCC	chr2	62736103	.	A	C	NON_SYNONYMOUS_CODING	MODERATE	MISSENSE	cTt/cGt	L828R	c.2483T>G	Kcnh7	ENSMUST00000075052	11	0.2424
B16F10 ATCC	chr2	63184068	.	G	A	NON_SYNONYMOUS_CODING	MODERATE	MISSENSE	Cgc/Tgc	R4C	c.10C>T	Kcnh7	ENSMUST00000075052	1	0.2000
B16F10 ATCC	chr17	52725890	.	G	C	NON_SYNONYMOUS_CODING	MODERATE	MISSENSE	aaG/aaC	K68N	c.204G>C	Kcnh8	ENSMUST00000039366	2	0.2727
B16F10 ATCC	chr17	52978292	.	A	G	NON_SYNONYMOUS_CODING	MODERATE	MISSENSE	Agc/Ggc	S1097G	c.3289A>G	Kcnh8	ENSMUST00000039366	16	0.2056
B16F10 ATCC	chr16	95296119	.	A	G	NON_SYNONYMOUS_CODING	MODERATE	MISSENSE	aAg/aGg	K200R	c.599A>G	Kcnj15	ENSMUST00000037154	4	0.1835
B16F10 ATCC	chr12	100061656	.	A	G	NON_SYNONYMOUS_CODING	MODERATE	MISSENSE	gAc/gGc	D330G	c.989A>G	Kcnk13	ENSMUST00000049788	3	0.1411
B16F10 ATCC	chr15	72546015	.	T	A	NON_SYNONYMOUS_CODING	MODERATE	MISSENSE	Act/Tct	T89S	c.265A>T	Kcnk9	ENSMUST00000044624	1	0.3125
B16F10 ATCC	chr3	89667130	.	A	T	NON_SYNONYMOUS_CODING	MODERATE	MISSENSE	Agt/Tgt	S650C	c.1948A>T	Kcnn3	ENSMUST00000000811	8	0.3956
B16F10 ATCC	chr1	21457529	.	G	A	NON_SYNONYMOUS_CODING	MODERATE	MISSENSE	cCg/cTg	P468L	c.1403C>T	Kcnq5	ENSMUST00000115300	11	0.1972
B16F10 ATCC	chr1	140573646	.	G	T	NON_SYNONYMOUS_CODING	MODERATE	MISSENSE	Gac/Tac	D917Y	c.2749G>T	Kcnt2	ENSMUST00000120796	24	0.2540
B16F10 ATCC	chr1	140584158	.	G	A	STOP_GAINED	HIGH	NONSENSE	tGg/tAg	W1017*	c.3050G>A	Kcnt2	ENSMUST00000120796	26	0.3571
B16F10 ATCC	chr8	105385335	.	A	C	NON_SYNONYMOUS_CODING	MODERATE	MISSENSE	cTt/cGt	L826R	c.2477T>G	Kctd19	ENSMUST00000063071	14	0.1529
B16F10 ATCC	chr11	115421987	.	A	G	NON_SYNONYMOUS_CODING	MODERATE	MISSENSE	gAg/gGg	E115G	c.344A>G	Kctd2	ENSMUST00000106533	2	0.4162
B16F10 ATCC	chr1	134605720	.	C	G	NON_SYNONYMOUS_CODING	MODERATE	MISSENSE	Cca/Gca	P516A	c.1546C>G	Kdm5b	ENSMUST00000047714	12	0.1584
B16F10 ATCC	chr5	75974466	.	T	TG	FRAME_SHIFT	HIGH		ccc/cccC	K33fs	c.96dupC	Kdr	ENSMUST00000113516	2	0.2000
B16F10 ATCC	chr17	57024249	.	C	T	NON_SYNONYMOUS_CODING+SPLICE_SITE_REGION	MODERATE	MISSENSE	cGa/cAa	R443Q	c.1328G>A	Khsrp	ENSMUST00000007814	12	0.1397
B16F10 ATCC	chr11	102908157	.	T	G	NON_SYNONYMOUS_CODING	MODERATE	MISSENSE	aaA/aaC	K739N	c.2217A>C	Kif18b	ENSMUST00000021311	13	0.5352
B16F10 ATCC	chr19	34950451	.	G	C	NON_SYNONYMOUS_CODING	MODERATE	MISSENSE	Gaa/Caa	E1038Q	c.3112G>C	Kif20b	ENSMUST00000087341	19	0.2059
B16F10 ATCC	chr4	41395091	.	C	A	NON_SYNONYMOUS_CODING	MODERATE	MISSENSE	aGc/aTc	S728I	c.2183G>T	Kif24	ENSMUST00000108055	11	0.4524
B16F10 ATCC	chr13	58288033	.	T	G	NON_SYNONYMOUS_CODING	MODERATE	MISSENSE	caA/caC	Q1315H	c.3945A>C	Kif27	ENSMUST00000043605	17	0.3540
B16F10 ATCC	chr15	76662104	.	G	T	NON_SYNONYMOUS_CODING	MODERATE	MISSENSE	Gtg/Ttg	V229L	c.685G>T	Kifc2	ENSMUST00000004294	7	0.1607
B16F10 ATCC	chr13	5864876	.	C	CG	FRAME_SHIFT	HIGH		gag/gGag	E107fs	c.319dupG	Klf6	ENSMUST00000000080	2	0.5513
B16F10 ATCC	chr1	171360297	.	G	A	NON_SYNONYMOUS_CODING	MODERATE	MISSENSE	gCg/gTg	A122V	c.365C>T	Klhdc9	ENSMUST00000061878	1	0.2182
B16F10 ATCC	chr16	17776543	.	T	G	NON_SYNONYMOUS_CODING	MODERATE	MISSENSE	Ttt/Gtt	F179V	c.535T>G	Klhl22	ENSMUST00000117192	4	0.2567
B16F10 ATCC	chr8	70451799	.	T	G	NON_SYNONYMOUS_CODING	MODERATE	MISSENSE	gAg/gCg	E487A	c.1460A>C	Klhl26	ENSMUST00000066597	3	0.5385
B16F10 ATCC	chr15	58322527	.	C	T	NON_SYNONYMOUS_CODING	MODERATE	MISSENSE	Gat/Aat	D269N	c.805G>A	Klhl38	ENSMUST00000022985	2	0.1475
B16F10 ATCC	chr2	69674730	.	A	C	NON_SYNONYMOUS_CODING+SPLICE_SITE_REGION	MODERATE	MISSENSE	aAa/aCa	K459T	c.1376A>C	Klhl41	ENSMUST00000100050	3	0.5185
B16F10 ATCC	chr5	24134956	.	G	A	SPLICE_SITE_REGION+INTRON	LOW				c.443-8G>A	Klhl7	ENSMUST00000030841	4	0.1373
B16F10 ATCC	chr7	43970401	.	A	C	NON_SYNONYMOUS_CODING	MODERATE	MISSENSE	aAg/aCg	K128T	c.383A>C	Klk1b1	ENSMUST00000078835	3	0.2153
B16F10 ATCC	chr7	44015996	.	A	T	NON_SYNONYMOUS_CODING	MODERATE	MISSENSE	caA/caT	Q109H	c.327A>T	Klk1b26	ENSMUST00000048945	3	0.1645
B16F10 ATCC	chr7	44200305	.	G	A	STOP_GAINED	HIGH	NONSENSE	tGg/tAg	W38*	c.113G>A	Klk1b3	ENSMUST00000085450	2	0.2312
B16F10 ATCC	chr7	43953847	.	C	A	SPLICE_SITE_REGION+INTRON	LOW				c.207-4C>A	Klk1b8	ENSMUST00000072204	2	0.2574
B16F10 ATCC	chr7	43850753	.	A	C	NON_SYNONYMOUS_CODING	MODERATE	MISSENSE	aAg/aCg	K255T	c.764A>C	Klk5	ENSMUST00000048444	5	0.2222
B16F10 ATCC	chr7	43828488	.	T	C	NON_SYNONYMOUS_CODING	MODERATE	MISSENSE	Tca/Cca	S95P	c.283T>C	Klk6	ENSMUST00000107966	5	0.2675
B16F10 ATCC	chr6	130380583	.	T	A	NON_SYNONYMOUS_CODING	MODERATE	MISSENSE	gAg/gTg	E27V	c.80A>T	Klra1	ENSMUST00000032288	4	0.1500
B16F10 ATCC	chr6	130281868	.	A	C	NON_SYNONYMOUS_CODING	MODERATE	MISSENSE	Ttg/Gtg	L19V	c.55T>G	Klra10	ENSMUST00000112020	1	0.1497
B16F10 ATCC	chr6	131228290	.	A	C	NON_SYNONYMOUS_CODING	MODERATE	MISSENSE	cTt/cGt	L196R	c.587T>G	Klra2	ENSMUST00000088867	6	0.3932
B16F10 ATCC	chr6	130115436	.	T	G	SPLICE_SITE_REGION	LOW				c.*22A>C	Klra8	ENSMUST00000014476	8	0.3000
B16F10 ATCC	chr3	92825057	.	G	A	STOP_GAINED	HIGH	NONSENSE	Caa/Taa	Q229*	c.685C>T	Kprp	ENSMUST00000072363	2	0.2453
B16F10 ATCC	chr7	16123070	.	T	C	NON_SYNONYMOUS_CODING	MODERATE	MISSENSE	cTg/cCg	L161P	c.482T>C	Kptn	ENSMUST00000006178	5	0.3000
B16F10 ATCC	chr6	48413359	.	G	T	SPLICE_SITE_REGION+INTRON	LOW				c.1970-4G>T	Krba1	ENSMUST00000114572	14	0.1688
B16F10 ATCC	chr9	21274122	.	C	A	NON_SYNONYMOUS_CODING	MODERATE	MISSENSE	gaG/gaT	E639D	c.1917G>T	Kri1	ENSMUST00000038671	19	0.2979
B16F10 ATCC	chr11	99386639	.	C	T	NON_SYNONYMOUS_CODING	MODERATE	MISSENSE	cGg/cAg	R411Q	c.1232G>A	Krt10	ENSMUST00000103131	6	0.2079
B16F10 ATCC	chr11	100248460	.	T	C	NON_SYNONYMOUS_CODING	MODERATE	MISSENSE	aAg/aGg	K144R	c.431A>G	Krt16	ENSMUST00000007280	1	0.1818
B16F10 ATCC	chr11	100104189	.	A	T	NON_SYNONYMOUS_CODING	MODERATE	MISSENSE	Ttg/Atg	L186M	c.556T>A	Krt36	ENSMUST00000107416	3	0.1591
B16F10 ATCC	chr15	101573665	.	C	G	NON_SYNONYMOUS_CODING	MODERATE	MISSENSE	gGc/gCc	G56A	c.167G>C	Krt75	ENSMUST00000042957	1	0.2632
B16F10 ATCC	chr15	101890551	.	A	G	NON_SYNONYMOUS_CODING	MODERATE	MISSENSE	cTg/cCg	L233P	c.698T>C	Krt76	ENSMUST00000100179	2	0.7865
B16F10 ATCC	chr11	79044879	.	G	C	NON_SYNONYMOUS_CODING	MODERATE	MISSENSE	Ctg/Gtg	L302V	c.904C>G	Ksr1	ENSMUST00000018478	4	0.4388
B16F10 ATCC	chr5	117747402	.	A	C	NON_SYNONYMOUS_CODING	MODERATE	MISSENSE	Acc/Ccc	T764P	c.2290A>C	Ksr2	ENSMUST00000180430	16	0.2124
B16F10 ATCC	chr2	43589475	.	A	C	SPLICE_SITE_REGION+INTRON	LOW				c.376+4A>C	Kynu	ENSMUST00000028223	4	0.2537
B16F10 ATCC	chr12	72077183	.	G	T	NON_SYNONYMOUS_CODING	MODERATE	MISSENSE	agC/agA	S300R	c.900C>A	L3hypdh	ENSMUST00000019862	4	0.1885
B16F10 ATCC	chr17	68630362	.	A	G	SPLICE_SITE_REGION+INTRON	LOW				c.1373+4A>G	L3mbtl4	ENSMUST00000093007	15	0.3582
B16F10 ATCC	chr17	67771082	.	G	A	NON_SYNONYMOUS_CODING	MODERATE	MISSENSE	Ggt/Agt	G1171S	c.3511G>A	Lama1	ENSMUST00000035471	24	0.2129
B16F10 ATCC	chr17	67810171	.	G	T	NON_SYNONYMOUS_CODING	MODERATE	MISSENSE	gGc/gTc	G2487V	c.7460G>T	Lama1	ENSMUST00000035471	52	0.3036
B16F10 ATCC	chr10	27324661	.	T	G	NON_SYNONYMOUS_CODING	MODERATE	MISSENSE	Agc/Cgc	S564R	c.1690A>C	Lama2	ENSMUST00000092639	12	0.2727
B16F10 ATCC	chr8	72912103	.	C	T	STOP_GAINED	HIGH	NONSENSE	tGg/tAg	W282*	c.845G>A	Large	ENSMUST00000004497	7	0.2866
B16F10 ATCC	chr3	92707849	.	A	G	NON_SYNONYMOUS_CODING	MODERATE	MISSENSE	Tgt/Cgt	C64R	c.190T>C	Lce1e	ENSMUST00000090867	2	0.2754
B16F10 ATCC	chr3	92707910	.	A	AG	FRAME_SHIFT	HIGH		cct/ccCt	V44fs	c.128dupC	Lce1e	ENSMUST00000090867	2	0.2390
B16F10 ATCC	chr3	92719254	.	T	C	NON_SYNONYMOUS_CODING	MODERATE	MISSENSE	aAa/aGa	K32R	c.95A>G	Lce1f	ENSMUST00000047153	2	0.1781
B16F10 ATCC	chr1	180897715	.	A	T	NON_SYNONYMOUS_CODING	MODERATE	MISSENSE	Agg/Tgg	R337W	c.1009A>T	Lefty2	ENSMUST00000085797	4	0.2800
B16F10 ATCC	chr3	92135598	.	T	A	NON_SYNONYMOUS_CODING	MODERATE	MISSENSE	aAg/aTg	K48M	c.143A>T	Lelp1	ENSMUST00000029535	2	0.3095
B16F10 ATCC	chr3	89402569	.	C	G	NON_SYNONYMOUS_CODING	MODERATE	MISSENSE	gGc/gCc	G24A	c.71G>C	Lenep	ENSMUST00000057431	1	0.4833
B16F10 ATCC	chr1	134988071	.	C	T	NON_SYNONYMOUS_CODING	MODERATE	MISSENSE	gGa/gAa	G590E	c.1769G>A	Lgr6	ENSMUST00000044828	18	0.1765
B16F10 ATCC	chr1	135003269	.	T	G	NON_SYNONYMOUS_CODING+SPLICE_SITE_REGION	MODERATE	MISSENSE	cAt/cCt	H287P	c.860A>C	Lgr6	ENSMUST00000044828	9	0.1795
B16F10 ATCC	chr7	45421730	.	A	C	NON_SYNONYMOUS_CODING	MODERATE	MISSENSE	caA/caC	Q126H	c.378A>C	LHB	ENSMUST00000072453	3	0.4516
B16F10 ATCC	chr7	66708664	.	A	C	NON_SYNONYMOUS_CODING	MODERATE	MISSENSE	aAg/aCg	K154T	c.461A>C	Lins	ENSMUST00000121777	4	0.2055
B16F10 ATCC	chr5	29323816	.	C	A	NON_SYNONYMOUS_CODING	MODERATE	MISSENSE	Gca/Tca	A137S	c.409G>T	Lmbr1	ENSMUST00000055195	5	0.1613
B16F10 ATCC	chr5	144182851	.	A	G	NON_SYNONYMOUS_CODING	MODERATE	MISSENSE	Agt/Ggt	S1377G	c.4129A>G	Lmtk2	ENSMUST00000041804	12	0.3228
B16F10 ATCC	chr5	107433311	.	C	T	NON_SYNONYMOUS_CODING	MODERATE	MISSENSE	Cca/Tca	P169S	c.505C>T	Lpcat2b	ENSMUST00000166599	2	0.3509
B16F10 ATCC	chr5	81329882	.	C	A	NON_SYNONYMOUS_CODING	MODERATE	MISSENSE	Cat/Aat	H61N	c.181C>A	Lphn3	ENSMUST00000120673	2	0.5000
B16F10 ATCC	chr5	81512158	.	A	T	NON_SYNONYMOUS_CODING	MODERATE	MISSENSE	gAc/gTc	D258V	c.773A>T	Lphn3	ENSMUST00000120673	6	0.2885
B16F10 ATCC	chr2	160892231	.	T	C	NON_SYNONYMOUS_CODING	MODERATE	MISSENSE	tTt/tCt	F12S	c.35T>C	Lpin3	ENSMUST00000109457	2	0.1667
B16F10 ATCC	chrX	147522643	.	T	TA	SPLICE_SITE_REGION+INTRON	LOW				c.549-5dupT	Lrch2	ENSMUST00000136789	2	0.7250
B16F10 ATCC	chr3	106732570	.	G	A	NON_SYNONYMOUS_CODING	MODERATE	MISSENSE	Gat/Aat	D324N	c.970G>A	Lrif1	ENSMUST00000098750	2	0.2398
B16F10 ATCC	chr14	37062305	.	A	C	NON_SYNONYMOUS_CODING	MODERATE	MISSENSE	aAc/aCc	N530T	c.1589A>C	Lrit1	ENSMUST00000120052	4	0.4194
B16F10 ATCC	chr10	127584379	.	G	A	NON_SYNONYMOUS_CODING	MODERATE	MISSENSE	Cgc/Tgc	R912C	c.2734C>T	Lrp1	ENSMUST00000049149	17	0.2375
B16F10 ATCC	chr14	54467922	.	A	C	NON_SYNONYMOUS_CODING	MODERATE	MISSENSE	Act/Cct	T190P	c.568A>C	Lrp10	ENSMUST00000022782	5	0.5510
B16F10 ATCC	chr17	84731784	.	G	A	STOP_GAINED	HIGH	NONSENSE	Cag/Tag	Q923*	c.2767C>T	Lrpprc	ENSMUST00000112308	26	0.2150
B16F10 ATCC	chr17	84770500	.	C	T	SPLICE_SITE_ACCEPTOR+INTRON	HIGH				c.1007-1G>A	Lrpprc	ENSMUST00000112308	8	0.2447
B16F10 ATCC	chr13	24044182	.	G	A	STOP_GAINED	HIGH	NONSENSE	Caa/Taa	Q1004*	c.3010C>T	Lrrc16a	ENSMUST00000072889	32	0.5538
B16F10 ATCC	chr14	55501568	.	C	T	NON_SYNONYMOUS_CODING	MODERATE	MISSENSE	aCg/aTg	T893M	c.2678C>T	Lrrc16b	ENSMUST00000076236	29	0.6364
B16F10 ATCC	chr14	33008510	.	C	T	NON_SYNONYMOUS_CODING	MODERATE	MISSENSE	gCc/gTc	A2V	c.5C>T	Lrrc18	ENSMUST00000120951	3	0.2361
B16F10 ATCC	chr7	67529631	.	T	G	NON_SYNONYMOUS_CODING	MODERATE	MISSENSE	aAg/aCg	K329T	c.986A>C	Lrrc28	ENSMUST00000053950	9	0.2529
B16F10 ATCC	chr17	67631695	.	T	C	NON_SYNONYMOUS_CODING	MODERATE	MISSENSE	Aaa/Gaa	K297E	c.889A>G	Lrrc30	ENSMUST00000097290	1	0.1724
B16F10 ATCC	chr7	98499060	.	G	A	NON_SYNONYMOUS_CODING	MODERATE	MISSENSE	aGa/aAa	R349K	c.1046G>A	Lrrc32	ENSMUST00000165205	2	0.2667
B16F10 ATCC	chr11	120720231	.	G	T	NON_SYNONYMOUS_CODING	MODERATE	MISSENSE	Gtc/Ttc	V572F	c.1714G>T	Lrrc45	ENSMUST00000026139	17	0.1481
B16F10 ATCC	chr1	167466494	.	C	A	NON_SYNONYMOUS_CODING	MODERATE	MISSENSE	gGa/gTa	G74V	c.221G>T	Lrrc52	ENSMUST00000036643	1	0.2312
B16F10 ATCC	chr14	75125990	.	C	T	NON_SYNONYMOUS_CODING	MODERATE	MISSENSE	Gaa/Aaa	E234K	c.700G>A	Lrrc63	ENSMUST00000022574	3	0.3974
B16F10 ATCC	chr2	30256808	.	C	T	NON_SYNONYMOUS_CODING	MODERATE	MISSENSE	Cgc/Tgc	R545C	c.1633C>T	Lrrc8a	ENSMUST00000095078	3	0.2157
B16F10 ATCC	chr12	72459987	.	T	G	NON_SYNONYMOUS_CODING	MODERATE	MISSENSE	gTt/gGt	V346G	c.1037T>G	Lrrc9	ENSMUST00000162159	9	0.2129
B16F10 ATCC	chr10	103202446	.	T	A	NON_SYNONYMOUS_CODING	MODERATE	MISSENSE	aAt/aTt	N832I	c.2495A>T	Lrriq1	ENSMUST00000166240	9	0.3636
B16F10 ATCC	chr3	30672140	.	G	A	SPLICE_SITE_ACCEPTOR+INTRON	HIGH				c.1639-1G>A	Lrriq4	ENSMUST00000108267	7	0.2364
B16F10 ATCC	chr15	91726240	.	T	G	NON_SYNONYMOUS_CODING	MODERATE	MISSENSE	gTt/gGt	V725G	c.2174T>G	Lrrk2	ENSMUST00000060642	18	0.1958
B16F10 ATCC	chr7	27307792	.	C	T	NON_SYNONYMOUS_CODING	MODERATE	MISSENSE	Gct/Act	A1430T	c.4288G>A	Ltbp4	ENSMUST00000038618	30	0.2308
B16F10 ATCC	chr17	26267255	.	T	G	NON_SYNONYMOUS_CODING	MODERATE	MISSENSE	cTt/cGt	L136R	c.407T>G	Luc7l	ENSMUST00000114976	5	0.2732
B16F10 ATCC	chr11	58386730	.	A	C	NON_SYNONYMOUS_CODING	MODERATE	MISSENSE	Aca/Cca	T113P	c.337A>C	Lypd8	ENSMUST00000013787	6	0.3412
B16F10 ATCC	chr13	13743433	.	A	T	NON_SYNONYMOUS_CODING	MODERATE	MISSENSE	caA/caT	Q3359H	c.10077A>T	Lyst	ENSMUST00000110559	44	0.3824
B16F10 ATCC	chr18	4181156	.	A	C	NON_SYNONYMOUS_CODING	MODERATE	MISSENSE	aAg/aCg	K114T	c.341A>C	Lyzl1	ENSMUST00000025076	4	0.2768
B16F10 ATCC	chr10	79664942	.	C	A	NON_SYNONYMOUS_CODING	MODERATE	MISSENSE	tCt/tAt	S31Y	c.92C>A	Madcam1	ENSMUST00000020554	2	0.2658
B16F10 ATCC	chr7	62378977	.	G	T	NON_SYNONYMOUS_CODING	MODERATE	MISSENSE	cGg/cTg	R543L	c.1628G>T	Magel2	ENSMUST00000080403	1	0.2609
B16F10 ATCC	chr8	31166095	.	A	G	NON_SYNONYMOUS_CODING	MODERATE	MISSENSE	cTg/cCg	L120P	c.359T>C	Mak16	ENSMUST00000033983	5	0.2469
B16F10 ATCC	chr5	36814324	.	C	T	SPLICE_SITE_REGION+INTRON	LOW				c.2042+5G>A	Man2b2	ENSMUST00000031002	12	0.2500
B16F10 ATCC	chr5	36815356	.	C	T	NON_SYNONYMOUS_CODING	MODERATE	MISSENSE	Gac/Aac	D605N	c.1813G>A	Man2b2	ENSMUST00000031002	11	0.2000
B16F10 ATCC	chr8	125671931	.	CG	C	FRAME_SHIFT	HIGH		gat/	D689fs	c.2065delG	Map10	ENSMUST00000053078	1	0.2245
B16F10 ATCC	chr13	99508115	.	T	G	NON_SYNONYMOUS_CODING	MODERATE	MISSENSE	gaA/gaC	E93D	c.279A>C	Map1b	ENSMUST00000064762	2	0.7015
B16F10 ATCC	chr8	70916449	.	T	G	NON_SYNONYMOUS_CODING	MODERATE	MISSENSE	Ttc/Gtc	F881V	c.2641T>G	Map1s	ENSMUST00000019405	6	0.3125
B16F10 ATCC	chr10	81106232	.	C	G	NON_SYNONYMOUS_CODING	MODERATE	MISSENSE	gCc/gGc	A29G	c.86C>G	Map2k2	ENSMUST00000143517	1	0.4500
B16F10 ATCC	chr1	127822950	.	G	T	NON_SYNONYMOUS_CODING	MODERATE	MISSENSE	gCt/gAt	A684D	c.2051C>A	Map3k19	ENSMUST00000061512	7	0.2275
B16F10 ATCC	chr11	106150353	.	G	A	NON_SYNONYMOUS_CODING	MODERATE	MISSENSE	Gac/Aac	D383N	c.1147G>A	Map3k3	ENSMUST00000002044	12	0.1667
B16F10 ATCC	chr4	133245066	.	C	G	NON_SYNONYMOUS_CODING	MODERATE	MISSENSE	Cac/Gac	H318D	c.952C>G	Map3k6	ENSMUST00000030677	6	0.3824
B16F10 ATCC	chr1	40022760	.	G	C	NON_SYNONYMOUS_CODING	MODERATE	MISSENSE	gGc/gCc	G1130A	c.3389G>C	Map4k4	ENSMUST00000163854	28	0.1386
B16F10 ATCC	chr5	121531591	.	C	T	NON_SYNONYMOUS_CODING	MODERATE	MISSENSE	Gag/Aag	E264K	c.790G>A	Mapkapk5	ENSMUST00000031410	9	0.2500
B16F10 ATCC	chr8	109948063	.	G	A	NON_SYNONYMOUS_CODING	MODERATE	MISSENSE	Cgt/Tgt	R374C	c.1120C>T	Marveld3	ENSMUST00000001722	3	0.1905
B16F10 ATCC	chr13	102738519	.	T	G	NON_SYNONYMOUS_CODING	MODERATE	MISSENSE	aAg/aCg	K1447T	c.4340A>C	Mast4	ENSMUST00000167058	29	0.2065
B16F10 ATCC	chr7	127024474	.	GGCCCT	G	FRAME_SHIFT	HIGH		cagggc/	Q415fs	c.1244_1248delAGGGC	Maz	ENSMUST00000032916	4	0.2645
B16F10 ATCC	chrX	60178713	.	T	C	NON_SYNONYMOUS_CODING	MODERATE	MISSENSE	cAc/cGc	H65R	c.194A>G	Mcf2	ENSMUST00000063507	1	0.5000
B16F10 ATCC	chr1	128344298	.	T	G	NON_SYNONYMOUS_CODING+SPLICE_SITE_REGION	MODERATE	MISSENSE	aAt/aCt	N454T	c.1361A>C	Mcm6	ENSMUST00000027601	9	0.1521
B16F10 ATCC	chr14	56060510	.	T	A	STOP_GAINED	HIGH	NONSENSE	Aga/Tga	R195*	c.583A>T	Mcpt4	ENSMUST00000043249	4	0.2835
B16F10 ATCC	chr10	118158362	.	A	C	NON_SYNONYMOUS_CODING	MODERATE	MISSENSE	aaA/aaC	K425N	c.1275A>C	Mdm1	ENSMUST00000163238	10	1.0000
B16F10 ATCC	chr1	132994547	.	A	G	NON_SYNONYMOUS_CODING	MODERATE	MISSENSE	Tcc/Ccc	S287P	c.859T>C	Mdm4	ENSMUST00000067398	10	0.1916
B16F10 ATCC	chr5	118749641	.	C	A	NON_SYNONYMOUS_CODING	MODERATE	MISSENSE	aCg/aAg	T1660K	c.4979C>A	Med13l	ENSMUST00000100816	22	0.2143
B16F10 ATCC	chrX	12677606	.	A	C	NON_SYNONYMOUS_CODING	MODERATE	MISSENSE	cTt/cGt	L1451R	c.4352T>G	Med14	ENSMUST00000096495	31	0.5200
B16F10 ATCC	chr9	64660476	.	A	T	NON_SYNONYMOUS_CODING	MODERATE	MISSENSE	Agt/Tgt	S416C	c.1246A>T	Megf11	ENSMUST00000164113	10	0.2639
B16F10 ATCC	chr7	25339669	.	G	A	NON_SYNONYMOUS_CODING	MODERATE	MISSENSE	Gag/Aag	E902K	c.2704G>A	Megf8	ENSMUST00000128119	15	0.2157
B16F10 ATCC	chr17	43491596	.	C	G	NON_SYNONYMOUS_CODING	MODERATE	MISSENSE	tgG/tgC	W192C	c.576G>C	Mep1a	ENSMUST00000024707	7	0.1467
B16F10 ATCC	chr11	57528142	.	T	A	NON_SYNONYMOUS_CODING	MODERATE	MISSENSE	Ttt/Att	F43I	c.127T>A	Mfap3	ENSMUST00000020830	2	0.1736
B16F10 ATCC	chr8	35590236	.	C	G	NON_SYNONYMOUS_CODING	MODERATE	MISSENSE	Ccc/Gcc	P622A	c.1864C>G	Mfhas1	ENSMUST00000037666	1	0.4808
B16F10 ATCC	chr6	40643060	.	G	C	NON_SYNONYMOUS_CODING	MODERATE	MISSENSE	Gtg/Ctg	V28L	c.82G>C	Mgam	ENSMUST00000071535	2	0.2168
B16F10 ATCC	chr6	136874263	.	T	G	SPLICE_SITE_REGION+INTRON	LOW				c.94+4A>C	Mgp	ENSMUST00000032342	2	0.1555
B16F10 ATCC	chr5	139706894	.	T	A	NON_SYNONYMOUS_CODING	MODERATE	MISSENSE	aAg/aTg	K991M	c.2972A>T	Micall2	ENSMUST00000044642	17	0.5072
B16F10 ATCC	chrX	169983948	.	A	C	SPLICE_SITE_REGION+INTRON	LOW				c.1014-8A>C	Mid1	ENSMUST00000036753	5	0.3651
B16F10 ATCC	chr7	18856399	.	G	A	SPLICE_SITE_REGION+INTRON	LOW				c.410-7G>A	Mill2	ENSMUST00000072386	3	0.3511
B16F10 ATCC	chr18	6936975	.	C	T	NON_SYNONYMOUS_CODING	MODERATE	MISSENSE	Gcc/Acc	A319T	c.955G>A	Mkx	ENSMUST00000079788	7	0.3193
B16F10 ATCC	chr17	13883780	.	G	A	NON_SYNONYMOUS_CODING	MODERATE	MISSENSE	aGt/aAt	S1133N	c.3398G>A	Mllt4	ENSMUST00000137784	27	0.2174
B16F10 ATCC	chr11	101087393	.	G	C	NON_SYNONYMOUS_CODING	MODERATE	MISSENSE	gGc/gCc	G23A	c.68G>C	Mlx	ENSMUST00000017945	1	0.1778
B16F10 ATCC	chr9	7387032	.	T	G	NON_SYNONYMOUS_CODING	MODERATE	MISSENSE	aAg/aCg	K60T	c.179A>C	Mmp1b	ENSMUST00000047888	2	0.2830
B16F10 ATCC	chr9	7639221	.	C	A	NON_SYNONYMOUS_CODING	MODERATE	MISSENSE	cCc/cAc	P130H	c.389C>A	Mmp20	ENSMUST00000034487	3	0.1951
B16F10 ATCC	chr2	164953267	.	GT	G	FRAME_SHIFT	HIGH		cgt/	R603fs	c.1809delT	Mmp9	ENSMUST00000017881	11	0.1842
B16F10 ATCC	chr5	111418280	.	T	A	NON_SYNONYMOUS_CODING	MODERATE	MISSENSE	Ttc/Atc	F39I	c.115T>A	Mn1	ENSMUST00000094463	1	0.2222
B16F10 ATCC	chr1	173907660	.	A	T	NON_SYNONYMOUS_CODING	MODERATE	MISSENSE	Ttt/Att	F68I	c.202T>A	Mnda	ENSMUST00000009340	2	0.2635
B16F10 ATCC	chr17	33136086	.	A	T	NON_SYNONYMOUS_CODING	MODERATE	MISSENSE	aTt/aAt	I904N	c.2711T>A	Morc2b	ENSMUST00000053896	2	0.2583
B16F10 ATCC	chr11	87795245	.	T	G	NON_SYNONYMOUS_CODING	MODERATE	MISSENSE	Ttt/Gtt	F74V	c.220T>G	Mpo	ENSMUST00000020779	4	0.8333
B16F10 ATCC	chr7	48198682	.	A	G	NON_SYNONYMOUS_CODING	MODERATE	MISSENSE	cTg/cCg	L166P	c.497T>C	Mrgprb4	ENSMUST00000094388	1	0.1484
B16F10 ATCC	chr7	143764656	.	C	G	NON_SYNONYMOUS_CODING	MODERATE	MISSENSE	Gcc/Ccc	A240P	c.718G>C	Mrgprg	ENSMUST00000058092	2	0.2667
B16F10 ATCC	chr7	48021129	.	T	G	NON_SYNONYMOUS_CODING	MODERATE	MISSENSE	aAa/aCa	K290T	c.869A>C	Mrgprx1	ENSMUST00000094390	2	0.1552
B16F10 ATCC	chr5	96262069	.	T	G	NON_SYNONYMOUS_CODING	MODERATE	MISSENSE	aTg/aGg	M267R	c.800T>G	Mrpl1	ENSMUST00000036437	8	0.1648
B16F10 ATCC	chr17	46647478	.	A	G	NON_SYNONYMOUS_CODING	MODERATE	MISSENSE	aAg/aGg	K62R	c.185A>G	Mrpl2	ENSMUST00000002844	2	0.1684
B16F10 ATCC	chr13	100739133	.	T	G	NON_SYNONYMOUS_CODING	MODERATE	MISSENSE	Agt/Cgt	S58R	c.172A>C	Mrps36	ENSMUST00000109333	3	0.6282
B16F10 ATCC	chr4	48552525	.	A	C	NON_SYNONYMOUS_CODING	MODERATE	MISSENSE	gAc/gCc	D38A	c.113A>C	Msantd3	ENSMUST00000061135	2	0.2464
B16F10 ATCC	chr12	113133200	.	C	T	NON_SYNONYMOUS_CODING	MODERATE	MISSENSE	cCg/cTg	P547L	c.1640C>T	Mta1	ENSMUST00000009099	17	0.2711
B16F10 ATCC	chr17	83762914	.	A	G	NON_SYNONYMOUS_CODING+SPLICE_SITE_REGION	MODERATE	MISSENSE	gAc/gGc	D167G	c.500A>G	Mta3	ENSMUST00000067826	7	0.5337
B16F10 ATCC	chr5	108087329	.	A	G	NON_SYNONYMOUS_CODING	MODERATE	MISSENSE	gAc/gGc	D139G	c.416A>G	Mtf2	ENSMUST00000081567	5	0.7353
B16F10 ATCC	chr10	4007844	.	T	G	NON_SYNONYMOUS_CODING	MODERATE	MISSENSE	Ttc/Gtc	F294V	c.880T>G	Mthfd1l	ENSMUST00000043735	8	0.5528
B16F10 ATCC	chr7	141811692	.	A	C	NON_SYNONYMOUS_CODING	MODERATE	MISSENSE	Acc/Ccc	T2688P	c.8062A>C	Muc5ac	ENSMUST00000155534	33	0.1842
B16F10 ATCC	chr7	141862214	.	A	G	NON_SYNONYMOUS_CODING	MODERATE	MISSENSE	Agt/Ggt	S2966G	c.8896A>G	Muc5b	ENSMUST00000165147	31	0.2623
B16F10 ATCC	chr7	141868079	.	T	G	SPLICE_SITE_REGION+INTRON	LOW				c.13207+6T>G	Muc5b	ENSMUST00000165147	37	0.1910
B16F10 ATCC	chr4	62087189	.	G	C	NON_SYNONYMOUS_CODING	MODERATE	MISSENSE	Ctg/Gtg	L15V	c.43C>G	Mup3	ENSMUST00000084531	1	0.2073
B16F10 ATCC	chr8	122439730	.	G	C	NON_SYNONYMOUS_CODING	MODERATE	MISSENSE	gCc/gGc	A56G	c.167C>G	Mvd	ENSMUST00000006692	3	0.4565
B16F10 ATCC	chr5	114458934	.	G	T	NON_SYNONYMOUS_CODING	MODERATE	MISSENSE	Ggg/Tgg	G321W	c.961G>T	Mvk	ENSMUST00000112239	10	0.3529
B16F10 ATCC	chr11	116804606	.	G	T	NON_SYNONYMOUS_CODING	MODERATE	MISSENSE	aaC/aaA	N157K	c.471C>A	Mxra7	ENSMUST00000021170	4	0.1895
B16F10 ATCC	chr7	44516503	.	T	C	NON_SYNONYMOUS_CODING	MODERATE	MISSENSE	aAg/aGg	K256R	c.767A>G	Mybpc2	ENSMUST00000165208	9	0.1604
B16F10 ATCC	chr2	91135359	.	A	G	NON_SYNONYMOUS_CODING	MODERATE	MISSENSE	gAg/gGg	E1172G	c.3515A>G	Mybpc3	ENSMUST00000169776	32	0.1758
B16F10 ATCC	chr14	103346282	.	C	A	NON_SYNONYMOUS_CODING	MODERATE	MISSENSE	aGg/aTg	R79M	c.236G>T	Mycbp2	ENSMUST00000159855	1	0.2857
B16F10 ATCC	chr11	94505784	.	A	C	NON_SYNONYMOUS_CODING	MODERATE	MISSENSE	Ttg/Gtg	L595V	c.1783T>G	Mycbpap	ENSMUST00000093945	14	0.2338
B16F10 ATCC	chr11	68768315	.	G	A	STOP_GAINED	HIGH	NONSENSE	tgG/tgA	W543*	c.1629G>A	Myh10	ENSMUST00000092984	13	0.2189
B16F10 ATCC	chr16	14269262	.	AG	A	FRAME_SHIFT+SPLICE_SITE_REGION	HIGH		acc/	T116fs	c.348delC	Myh11	ENSMUST00000090287	3	0.4630
B16F10 ATCC	chr11	67180763	.	GTATT	G	SPLICE_SITE_ACCEPTOR+SPLICE_SITE_REGION+INTRON	HIGH				c.1417-5_1417-2delTTTA	Myh2	ENSMUST00000018641	13	0.1911
B16F10 ATCC	chr11	67191449	.	C	T	NON_SYNONYMOUS_CODING	MODERATE	MISSENSE	Ctt/Ttt	L1326F	c.3976C>T	Myh2	ENSMUST00000018641	28	0.2024
B16F10 ATCC	chr14	54956997	.	C	T	NON_SYNONYMOUS_CODING	MODERATE	MISSENSE	cGc/cAc	R725H	c.2174G>A	Myh6	ENSMUST00000081857	19	0.4054
B16F10 ATCC	chr11	67298592	.	A	C	NON_SYNONYMOUS_CODING	MODERATE	MISSENSE	aAg/aCg	K1198T	c.3593A>C	Myh8	ENSMUST00000019625	27	0.4630
B16F10 ATCC	chr15	77773279	.	A	C	NON_SYNONYMOUS_CODING	MODERATE	MISSENSE	Ttg/Gtg	L1089V	c.3265T>G	Myh9	ENSMUST00000016771	25	0.2414
B16F10 ATCC	chr5	112692943	.	G	A	NON_SYNONYMOUS_CODING	MODERATE	MISSENSE	tCa/tTa	S2328L	c.6983C>T	Myo18b	ENSMUST00000086617	43	0.3750
B16F10 ATCC	chr5	112757484	.	C	T	NON_SYNONYMOUS_CODING	MODERATE	MISSENSE	Gag/Aag	E2083K	c.6247G>A	Myo18b	ENSMUST00000086617	39	0.3810
B16F10 ATCC	chr11	80674898	.	T	G	NON_SYNONYMOUS_CODING	MODERATE	MISSENSE	aAc/aCc	N367T	c.1100A>C	Myo1d	ENSMUST00000041065	9	0.3018
B16F10 ATCC	chr18	74744749	.	G	C	NON_SYNONYMOUS_CODING	MODERATE	MISSENSE	gaG/gaC	E1606D	c.4818G>C	Myo5b	ENSMUST00000121875	36	0.3286
B16F10 ATCC	chr9	75245059	.	C	G	NON_SYNONYMOUS_CODING	MODERATE	MISSENSE	agC/agG	S76R	c.228C>G	Myo5c	ENSMUST00000036555	3	0.2308
B16F10 ATCC	chr8	15081271	.	T	C	NON_SYNONYMOUS_CODING	MODERATE	MISSENSE	cTg/cCg	L323P	c.968T>C	Myom2	ENSMUST00000033842	10	0.3048
B16F10 ATCC	chr19	10221298	.	C	A	NON_SYNONYMOUS_CODING	MODERATE	MISSENSE	caG/caT	Q397H	c.1191G>T	Myrf	ENSMUST00000088013	8	0.2955
B16F10 ATCC	chr8	84673286	.	G	C	NON_SYNONYMOUS_CODING	MODERATE	MISSENSE	gCc/gGc	A434G	c.1301C>G	Nacc1	ENSMUST00000001975	6	0.4762
B16F10 ATCC	chr8	104513196	.	T	C	SPLICE_SITE_REGION+INTRON	LOW				c.1495+4A>G	Nae1	ENSMUST00000034349	19	0.2013
B16F10 ATCC	chr13	100161909	.	A	T	NON_SYNONYMOUS_CODING	MODERATE	MISSENSE	Tac/Aac	Y540N	c.1618T>A	Naip2	ENSMUST00000067975	10	0.9897
B16F10 ATCC	chrX	103185196	.	T	G	NON_SYNONYMOUS_CODING	MODERATE	MISSENSE	aAt/aCt	N372T	c.1115A>C	Nap1l2	ENSMUST00000121720	1	0.2176
B16F10 ATCC	chr6	85831193	.	G	T	START_GAINED	LOW				c.-44C>A	Nat8	ENSMUST00000032073	2	0.1350
B16F10 ATCC	chr1	135470724	.	T	C	NON_SYNONYMOUS_CODING	MODERATE	MISSENSE	Acc/Gcc	T707A	c.2119A>G	Nav1	ENSMUST00000040599	6	0.1818
B16F10 ATCC	chr3	55723163	.	G	A	NON_SYNONYMOUS_CODING	MODERATE	MISSENSE	aCc/aTc	T2251I	c.6752C>T	Nbea	ENSMUST00000029374	43	0.2638
B16F10 ATCC	chr9	110628389	.	C	A	SPLICE_SITE_REGION+INTRON	LOW				c.6789+5G>T	Nbeal2	ENSMUST00000167320	42	0.1905
B16F10 ATCC	chr9	110632372	.	G	C	NON_SYNONYMOUS_CODING	MODERATE	MISSENSE	gCc/gGc	A1570G	c.4709C>G	Nbeal2	ENSMUST00000167320	30	0.2500
B16F10 ATCC	chr5	45679880	.	T	G	NON_SYNONYMOUS_CODING	MODERATE	MISSENSE	cTt/cGt	L431R	c.1292T>G	Ncapg	ENSMUST00000117396	9	0.2198
B16F10 ATCC	chr1	43554383	.	A	C	NON_SYNONYMOUS_CODING	MODERATE	MISSENSE	aAc/aCc	N250T	c.749A>C	Nck2	ENSMUST00000086421	4	0.1522
B16F10 ATCC	chr1	126024832	.	G	A	NON_SYNONYMOUS_CODING	MODERATE	MISSENSE	Cgc/Tgc	R1396C	c.4186C>T	Nckap5	ENSMUST00000112583	12	0.1127
B16F10 ATCC	chr9	108814677	.	G	C	NON_SYNONYMOUS_CODING	MODERATE	MISSENSE	aaG/aaC	K492N	c.1476G>C	Nckipsd	ENSMUST00000035218	9	0.6992
B16F10 ATCC	chr11	62378552	.	T	G	NON_SYNONYMOUS_CODING	MODERATE	MISSENSE	cAt/cCt	H673P	c.2018A>C	Ncor1	ENSMUST00000018645	18	0.1729
B16F10 ATCC	chr5	125086840	.	C	T	SPLICE_SITE_DONOR+INTRON	HIGH				c.1149+1G>A	Ncor2	ENSMUST00000111402	11	0.2727
B16F10 ATCC	chr7	62349134	.	T	G	NON_SYNONYMOUS_CODING	MODERATE	MISSENSE	Ttc/Gtc	F243V	c.727T>G	Ndn	ENSMUST00000038775	1	0.1954
B16F10 ATCC	chr2	52169872	.	C	T	NON_SYNONYMOUS_CODING	MODERATE	MISSENSE	Gtc/Atc	V6336I	c.19006G>A	Neb	ENSMUST00000036934	135	0.2000
B16F10 ATCC	chr2	52308567	.	T	A	NON_SYNONYMOUS_CODING	MODERATE	MISSENSE	aAg/aTg	K423M	c.1268A>T	Neb	ENSMUST00000036934	15	0.4796
B16F10 ATCC	chr1	138515625	.	C	A	NON_SYNONYMOUS_CODING+SPLICE_SITE_REGION	MODERATE	MISSENSE	Gtg/Ttg	V197L	c.589G>T	Nek7	ENSMUST00000186017	7	0.1721
B16F10 ATCC	chr2	174426494	.	GT	G	FRAME_SHIFT	HIGH		ttg/	L509fs	c.1526delT	Nelfcd	ENSMUST00000016397	13	0.1972
B16F10 ATCC	chr15	95435097	.	A	T	NON_SYNONYMOUS_CODING	MODERATE	MISSENSE	Ttg/Atg	L194M	c.580T>A	Nell2	ENSMUST00000075275	6	0.1457
B16F10 ATCC	chr6	55679362	.	G	A	STOP_GAINED	HIGH	NONSENSE	Cag/Tag	Q97*	c.289C>T	Neurod6	ENSMUST00000044767	2	0.2794
B16F10 ATCC	chr16	55816438	.	G	C	NON_SYNONYMOUS_CODING	MODERATE	MISSENSE	gCc/gGc	A500G	c.1499C>G	Nfkbiz	ENSMUST00000036273	9	0.2381
B16F10 ATCC	chr9	31411333	.	A	C	NON_SYNONYMOUS_CODING	MODERATE	MISSENSE	Agt/Cgt	S900R	c.2698A>C	Nfrkb	ENSMUST00000086167	22	0.7246
B16F10 ATCC	chr12	70042900	.	T	G	NON_SYNONYMOUS_CODING	MODERATE	MISSENSE	aAc/aCc	N1247T	c.3740A>C	Nin	ENSMUST00000085314	16	0.2283
B16F10 ATCC	chr15	8307882	.	T	A	NON_SYNONYMOUS_CODING	MODERATE	MISSENSE	gaA/gaT	E2065D	c.6195A>T	Nipbl	ENSMUST00000052965	35	0.7443
B16F10 ATCC	chr15	8350359	.	A	AT	FRAME_SHIFT	HIGH		atg/aAtg	M983fs	c.2947dupA	Nipbl	ENSMUST00000052965	10	0.2294
B16F10 ATCC	chr3	25435849	.	T	G	SPLICE_SITE_REGION+INTRON	LOW				c.1709+4A>C	Nlgn1	ENSMUST00000075054	5	0.3028
B16F10 ATCC	chr8	94504464	.	A	G	NON_SYNONYMOUS_CODING+SPLICE_SITE_REGION	MODERATE	MISSENSE	gAc/gGc	D1275G	c.3824A>G	Nlrc5	ENSMUST00000053085	26	0.5155
B16F10 ATCC	chr7	3222537	.	T	C	NON_SYNONYMOUS_CODING	MODERATE	MISSENSE	aAa/aGa	K1034R	c.3101A>G	Nlrp12	ENSMUST00000108653	10	1.0000
B16F10 ATCC	chr7	107186622	.	T	G	NON_SYNONYMOUS_CODING	MODERATE	MISSENSE	cTt/cGt	L635R	c.1904T>G	Nlrp14	ENSMUST00000084763	5	0.2583
B16F10 ATCC	chr11	59551860	.	G	C	NON_SYNONYMOUS_CODING	MODERATE	MISSENSE	aGt/aCt	S746T	c.2237G>C	Nlrp3	ENSMUST00000079476	6	0.1511
B16F10 ATCC	chr7	26454163	.	T	C	NON_SYNONYMOUS_CODING	MODERATE	MISSENSE	gTc/gCc	V713A	c.2138T>C	Nlrp4a	ENSMUST00000068767	6	0.2083
B16F10 ATCC	chr7	10715487	.	TA	T	FRAME_SHIFT	HIGH		ata/	I542fs	c.1624delA	Nlrp4b	ENSMUST00000047809	4	0.5191
B16F10 ATCC	chr7	6066636	.	A	C	NON_SYNONYMOUS_CODING	MODERATE	MISSENSE	aAg/aCg	K512T	c.1535A>C	Nlrp4c	ENSMUST00000037728	3	0.2564
B16F10 ATCC	chr7	23336901	.	A	C	SPLICE_SITE_REGION+INTRON	LOW				c.2174+4A>C	Nlrp4e	ENSMUST00000076470	4	0.1866
B16F10 ATCC	chr13	65194302	.	C	T	NON_SYNONYMOUS_CODING	MODERATE	MISSENSE	Gaa/Aaa	E510K	c.1528G>A	Nlrp4f	ENSMUST00000037372	3	0.3556
B16F10 ATCC	chr7	23404167	.	G	A	NON_SYNONYMOUS_CODING	MODERATE	MISSENSE	Gaa/Aaa	E20K	c.58G>A	Nlrp5	ENSMUST00000015866	2	0.2700
B16F10 ATCC	chr7	23417586	.	T	C	NON_SYNONYMOUS_CODING	MODERATE	MISSENSE	cTg/cCg	L245P	c.734T>C	Nlrp5	ENSMUST00000015866	8	0.2537
B16F10 ATCC	chr13	19688957	.	T	A	NON_SYNONYMOUS_CODING	MODERATE	MISSENSE	gaA/gaT	E172D	c.516A>T	Nme8	ENSMUST00000091763	8	0.7879
B16F10 ATCC	chr13	119338446	.	G	A	NON_SYNONYMOUS_CODING	MODERATE	MISSENSE	tCa/tTa	S763L	c.2288C>T	Nnt	ENSMUST00000099149	16	0.2437
B16F10 ATCC	chr18	22921902	.	C	T	NON_SYNONYMOUS_CODING	MODERATE	MISSENSE	aGc/aAc	S157N	c.470G>A	Nol4	ENSMUST00000164186	3	0.2688
B16F10 ATCC	chr2	69188992	.	C	A	SPLICE_SITE_REGION+INTRON	LOW				c.1385-5C>A	Nostrin	ENSMUST00000041865	15	0.2500
B16F10 ATCC	chr2	26477115	.	T	G	NON_SYNONYMOUS_CODING	MODERATE	MISSENSE	gAc/gCc	D680A	c.2039A>C	Notch1	ENSMUST00000028288	13	0.2885
B16F10 ATCC	chr17	32158652	.	C	G	NON_SYNONYMOUS_CODING	MODERATE	MISSENSE	gGc/gCc	G150A	c.449G>C	Notch3	ENSMUST00000087723	4	0.2031
B16F10 ATCC	chr17	34587915	.	C	T	NON_SYNONYMOUS_CODING	MODERATE	MISSENSE	cCt/cTt	P1942L	c.5825C>T	Notch4	ENSMUST00000015612	30	0.3043
B16F10 ATCC	chr9	24300475	.	G	A	NON_SYNONYMOUS_CODING+SPLICE_SITE_REGION	MODERATE	MISSENSE	Gat/Aat	D253N	c.757G>A	Npsr1	ENSMUST00000059650	7	0.1704
B16F10 ATCC	chr8	76908632	.	C	A	NON_SYNONYMOUS_CODING	MODERATE	MISSENSE	Cag/Aag	Q121K	c.361C>A	Nr3c2	ENSMUST00000034031	1	0.2432
B16F10 ATCC	chr2	57111614	.	C	T	NON_SYNONYMOUS_CODING	MODERATE	MISSENSE	Ggt/Agt	G276S	c.826G>A	Nr4a2	ENSMUST00000028166	3	0.1458
B16F10 ATCC	chr15	76088329	.	T	A	NON_SYNONYMOUS_CODING	MODERATE	MISSENSE	Act/Tct	T166S	c.496A>T	Nrbp2	ENSMUST00000019516	8	0.1915
B16F10 ATCC	chr8	31918005	.	G	C	NON_SYNONYMOUS_CODING	MODERATE	MISSENSE	Ctc/Gtc	L67V	c.199C>G	Nrg1	ENSMUST00000073884	1	0.3667
B16F10 ATCC	chr17	90059505	.	T	A	NON_SYNONYMOUS_CODING	MODERATE	MISSENSE	gAc/gTc	D1403V	c.4208A>T	Nrxn1	ENSMUST00000161402	21	0.2439
B16F10 ATCC	chr13	55213848	.	A	C	NON_SYNONYMOUS_CODING	MODERATE	MISSENSE	Agt/Cgt	S210R	c.628A>C	Nsd1	ENSMUST00000099490	2	0.2596
B16F10 ATCC	chr13	69615465	.	A	T	NON_SYNONYMOUS_CODING	MODERATE	MISSENSE	aAg/aTg	K138M	c.413A>T	Nsun2	ENSMUST00000109699	4	0.2705
B16F10 ATCC	chr9	29109392	.	T	C	SPLICE_SITE_REGION+INTRON	LOW				c.526+4A>G	Ntm	ENSMUST00000075069	4	0.2887
B16F10 ATCC	chr7	45694203	.	G	C	NON_SYNONYMOUS_CODING	MODERATE	MISSENSE	gGc/gCc	G391A	c.1172G>C	Ntn5	ENSMUST00000107742	6	0.2368
B16F10 ATCC	chr3	109827623	.	T	G	SPLICE_SITE_REGION+INTRON	LOW				c.1390+4A>C	Ntng1	ENSMUST00000072596	6	0.1642
B16F10 ATCC	chr10	95552515	.	C	T	NON_SYNONYMOUS_CODING	MODERATE	MISSENSE	Ggt/Agt	G60S	c.178G>A	Nudt4	ENSMUST00000020217	2	0.4021
B16F10 ATCC	chr7	101998331	.	T	G	NON_SYNONYMOUS_CODING	MODERATE	MISSENSE	cTt/cGt	L423R	c.1268T>G	Numa1	ENSMUST00000084852	14	0.2421
B16F10 ATCC	chr2	32011223	.	T	C	NON_SYNONYMOUS_CODING	MODERATE	MISSENSE	Ttc/Ctc	F940L	c.2818T>C	Nup214	ENSMUST00000065398	21	0.2032
B16F10 ATCC	chr5	138240914	.	G	A	SPLICE_SITE_ACCEPTOR+INTRON	HIGH				c.801-1G>A	Nxpe5	ENSMUST00000161047	3	0.2319
B16F10 ATCC	chr2	23400217	.	G	T	NON_SYNONYMOUS_CODING	MODERATE	MISSENSE	Gca/Tca	A194S	c.580G>T	Nxph2	ENSMUST00000102945	2	0.4172
B16F10 ATCC	chr10	80826829	.	C	G	NON_SYNONYMOUS_CODING	MODERATE	MISSENSE	Cgc/Ggc	R24G	c.70C>G	Oaz1	ENSMUST00000180036	1	0.5357
B16F10 ATCC	chr7	15397338	.	A	G	NON_SYNONYMOUS_CODING	MODERATE	MISSENSE	aAa/aGa	K123R	c.368A>G	Obox2	ENSMUST00000036575	3	0.2366
B16F10 ATCC	chr11	59067293	.	T	G	NON_SYNONYMOUS_CODING	MODERATE	MISSENSE	aAg/aCg	K3527T	c.10580A>C	Obscn	ENSMUST00000047441	39	0.2019
B16F10 ATCC	chr7	56330375	.	G	T	NON_SYNONYMOUS_CODING+SPLICE_SITE_REGION	MODERATE	MISSENSE	aaG/aaT	K609N	c.1827G>T	Oca2	ENSMUST00000032633	17	0.2525
B16F10 ATCC	chr13	100535052	.	G	A	STOP_GAINED	HIGH	NONSENSE	Cga/Tga	R266*	c.796C>T	Ocln	ENSMUST00000022140	4	0.3318
B16F10 ATCC	chr15	38219674	.	A	G	NON_SYNONYMOUS_CODING	MODERATE	MISSENSE	tAc/tGc	Y82C	c.245A>G	Odf1	ENSMUST00000081966	1	0.1682
B16F10 ATCC	chr13	40072813	.	G	T	SPLICE_SITE_REGION+INTRON	LOW				c.2247-5C>A	Ofcc1	ENSMUST00000054635	15	0.2593
B16F10 ATCC	chr11	6355427	.	A	C	NON_SYNONYMOUS_CODING	MODERATE	MISSENSE	gAc/gCc	D989A	c.2966A>C	Ogdh	ENSMUST00000093350	23	0.2067
B16F10 ATCC	chr2	85777122	.	T	G	NON_SYNONYMOUS_CODING	MODERATE	MISSENSE	gaT/gaG	D179E	c.537T>G	Olfr1014	ENSMUST00000076250	1	0.5292
B16F10 ATCC	chr2	85918674	.	G	GT	FRAME_SHIFT	HIGH		tat/tTat	Y252fs	c.754dupT	Olfr1025-ps1	ENSMUST00000077055	1	0.2797
B16F10 ATCC	chr2	85923798	.	T	G	NON_SYNONYMOUS_CODING	MODERATE	MISSENSE	Ttc/Gtc	F177V	c.529T>G	Olfr1026	ENSMUST00000056718	1	0.1826
B16F10 ATCC	chr17	37336705	.	A	C	NON_SYNONYMOUS_CODING	MODERATE	MISSENSE	Ttc/Gtc	F176V	c.526T>G	Olfr103	ENSMUST00000058826	1	0.2219
B16F10 ATCC	chr2	86041719	.	T	C	NON_SYNONYMOUS_CODING	MODERATE	MISSENSE	Tcc/Ccc	S135P	c.403T>C	Olfr1033	ENSMUST00000111589	1	0.2423
B16F10 ATCC	chr2	86075323	.	G	T	NON_SYNONYMOUS_CODING	MODERATE	MISSENSE	gaG/gaT	E194D	c.582G>T	Olfr1036	ENSMUST00000164985	1	0.2138
B16F10 ATCC	chr2	86084982	.	C	T	NON_SYNONYMOUS_CODING	MODERATE	MISSENSE	aGc/aAc	S265N	c.794G>A	Olfr1037	ENSMUST00000099911	1	0.2172
B16F10 ATCC	chr2	86228222	.	C	A	NON_SYNONYMOUS_CODING	MODERATE	MISSENSE	Gtc/Ttc	V250F	c.748G>T	Olfr1047	ENSMUST00000099901	1	0.2143
B16F10 ATCC	chr2	86275980	.	C	T	NON_SYNONYMOUS_CODING	MODERATE	MISSENSE	tGt/tAt	C169Y	c.506G>A	Olfr1051	ENSMUST00000099898	1	0.2114
B16F10 ATCC	chr2	86355893	.	A	T	NON_SYNONYMOUS_CODING	MODERATE	MISSENSE	aTt/aAt	I163N	c.488T>A	Olfr1056	ENSMUST00000099893	1	0.2921
B16F10 ATCC	chr2	86385756	.	T	C	NON_SYNONYMOUS_CODING	MODERATE	MISSENSE	Att/Gtt	I221V	c.661A>G	Olfr1058	ENSMUST00000102631	1	0.2533
B16F10 ATCC	chr2	86386179	.	T	G	NON_SYNONYMOUS_CODING	MODERATE	MISSENSE	Aaa/Caa	K80Q	c.238A>C	Olfr1058	ENSMUST00000102631	1	0.2103
B16F10 ATCC	chr2	86553966	.	C	T	NON_SYNONYMOUS_CODING	MODERATE	MISSENSE	Gcc/Acc	A53T	c.157G>A	Olfr1080	ENSMUST00000099881	1	0.2159
B16F10 ATCC	chr2	86639003	.	C	T	NON_SYNONYMOUS_CODING	MODERATE	MISSENSE	cGc/cAc	R235H	c.704G>A	Olfr1084	ENSMUST00000099880	1	0.2410
B16F10 ATCC	chr2	86786473	.	A	G	NON_SYNONYMOUS_CODING	MODERATE	MISSENSE	Aaa/Gaa	K248E	c.742A>G	Olfr1093	ENSMUST00000055273	1	0.2405
B16F10 ATCC	chr2	86958666	.	T	G	NON_SYNONYMOUS_CODING	MODERATE	MISSENSE	aAg/aCg	K264T	c.791A>C	Olfr1099	ENSMUST00000099871	1	0.2222
B16F10 ATCC	chr2	87048433	.	A	C	NON_SYNONYMOUS_CODING	MODERATE	MISSENSE	Tta/Gta	L268V	c.802T>G	Olfr1106	ENSMUST00000099867	1	0.2179
B16F10 ATCC	chr2	87213778	.	T	G	NON_SYNONYMOUS_CODING	MODERATE	MISSENSE	atT/atG	I295M	c.885T>G	Olfr1113	ENSMUST00000079966	1	0.2670
B16F10 ATCC	chr2	87435159	.	A	G	NON_SYNONYMOUS_CODING	MODERATE	MISSENSE	tAt/tGt	Y224C	c.671A>G	Olfr1124	ENSMUST00000062494	1	0.1951
B16F10 ATCC	chr2	87575680	.	T	C	NON_SYNONYMOUS_CODING	MODERATE	MISSENSE	Tca/Cca	S199P	c.595T>C	Olfr1129	ENSMUST00000081034	1	0.2650
B16F10 ATCC	chr2	87656421	.	A	T	NON_SYNONYMOUS_CODING	MODERATE	MISSENSE	Tcc/Acc	S167T	c.499T>A	Olfr1134	ENSMUST00000099854	1	0.2339
B16F10 ATCC	chr2	87656877	.	A	C	NON_SYNONYMOUS_CODING	MODERATE	MISSENSE	Tta/Gta	L15V	c.43T>G	Olfr1134	ENSMUST00000099854	1	0.2474
B16F10 ATCC	chr2	87746489	.	G	T	NON_SYNONYMOUS_CODING	MODERATE	MISSENSE	Gca/Tca	A98S	c.292G>T	Olfr1140	ENSMUST00000111568	1	0.2139
B16F10 ATCC	chr2	87810746	.	C	A	NON_SYNONYMOUS_CODING	MODERATE	MISSENSE	Ctt/Att	L309I	c.925C>A	Olfr1145	ENSMUST00000090707	1	0.1834
B16F10 ATCC	chr2	87896633	.	G	A	NON_SYNONYMOUS_CODING	MODERATE	MISSENSE	Gct/Act	A153T	c.457G>A	Olfr1153	ENSMUST00000052300	1	0.2622
B16F10 ATCC	chr2	87903584	.	A	C	NON_SYNONYMOUS_CODING	MODERATE	MISSENSE	Ttt/Gtt	F31V	c.91T>G	Olfr1154	ENSMUST00000099844	1	0.2660
B16F10 ATCC	chr2	87943448	.	G	A	NON_SYNONYMOUS_CODING	MODERATE	MISSENSE	cCc/cTc	P60L	c.179C>T	Olfr1155	ENSMUST00000099843	1	0.4894
B16F10 ATCC	chr17	37624429	.	G	T	NON_SYNONYMOUS_CODING	MODERATE	MISSENSE	Ctg/Atg	L69M	c.205C>A	Olfr116	ENSMUST00000072265	1	0.2460
B16F10 ATCC	chr2	88678664	.	T	G	NON_SYNONYMOUS_CODING	MODERATE	MISSENSE	Ttc/Gtc	F270V	c.808T>G	Olfr1193	ENSMUST00000081697	1	0.2436
B16F10 ATCC	chr2	88746578	.	A	C	NON_SYNONYMOUS_CODING	MODERATE	MISSENSE	ttT/ttG	F103L	c.309T>G	Olfr1198	ENSMUST00000099814	1	0.2217
B16F10 ATCC	chr17	37726092	.	T	A	NON_SYNONYMOUS_CODING	MODERATE	MISSENSE	Ttc/Atc	F32I	c.94T>A	Olfr120	ENSMUST00000077498	1	0.2528
B16F10 ATCC	chr2	89001838	.	C	A	NON_SYNONYMOUS_CODING	MODERATE	MISSENSE	gGg/gTg	G150V	c.449G>T	Olfr1215	ENSMUST00000188399	1	0.2168
B16F10 ATCC	chr2	89943770	.	A	G	NON_SYNONYMOUS_CODING	MODERATE	MISSENSE	gTg/gCg	V115A	c.344T>C	Olfr1259	ENSMUST00000090695	1	0.1737
B16F10 ATCC	chr2	90037257	.	C	T	NON_SYNONYMOUS_CODING	MODERATE	MISSENSE	Ctc/Ttc	L113F	c.337C>T	Olfr1265	ENSMUST00000080311	1	0.2088
B16F10 ATCC	chr2	90282320	.	A	C	NON_SYNONYMOUS_CODING	MODERATE	MISSENSE	gTt/gGt	V85G	c.254T>G	Olfr1272	ENSMUST00000099750	1	0.2724
B16F10 ATCC	chr2	90282347	.	A	G	NON_SYNONYMOUS_CODING	MODERATE	MISSENSE	gTc/gCc	V76A	c.227T>C	Olfr1272	ENSMUST00000099750	1	0.2454
B16F10 ATCC	chr2	111257859	.	T	G	NON_SYNONYMOUS_CODING	MODERATE	MISSENSE	gTt/gGt	V248G	c.743T>G	Olfr1276	ENSMUST00000073322	1	0.2275
B16F10 ATCC	chr2	111269668	.	GC	G	FRAME_SHIFT	HIGH		gca/	A233fs	c.697delG	Olfr1277	ENSMUST00000099619	1	0.2815
B16F10 ATCC	chr2	111449457	.	T	C	NON_SYNONYMOUS_CODING	MODERATE	MISSENSE	Ttc/Ctc	F106L	c.316T>C	Olfr1287	ENSMUST00000075390	1	0.4855
B16F10 ATCC	chr2	111537814	.	A	C	NON_SYNONYMOUS_CODING	MODERATE	MISSENSE	atT/atG	I158M	c.474T>G	Olfr1294	ENSMUST00000099614	1	0.2724
B16F10 ATCC	chr4	118916588	.	A	C	NON_SYNONYMOUS_CODING	MODERATE	MISSENSE	cTg/cGg	L293R	c.878T>G	Olfr1329	ENSMUST00000071979	1	0.2864
B16F10 ATCC	chr11	49494673	.	G	A	NON_SYNONYMOUS_CODING	MODERATE	MISSENSE	Gct/Act	A47T	c.139G>A	Olfr1385	ENSMUST00000071807	1	0.1807
B16F10 ATCC	chr11	49460456	.	T	G	NON_SYNONYMOUS_CODING	MODERATE	MISSENSE	cTt/cGt	L259R	c.776T>G	Olfr1387	ENSMUST00000073824	1	0.1706
B16F10 ATCC	chr1	92588551	.	T	A	NON_SYNONYMOUS_CODING	MODERATE	MISSENSE	Tcc/Acc	S74T	c.220T>A	Olfr1412	ENSMUST00000062964	1	0.2396
B16F10 ATCC	chr19	12059129	.	T	C	NON_SYNONYMOUS_CODING	MODERATE	MISSENSE	Aca/Gca	T208A	c.622A>G	Olfr1424	ENSMUST00000087830	1	0.3187
B16F10 ATCC	chr19	12210490	.	A	C	NON_SYNONYMOUS_CODING	MODERATE	MISSENSE	aAg/aCg	K308T	c.923A>C	Olfr1431	ENSMUST00000072316	1	0.3247
B16F10 ATCC	chr19	12394299	.	A	C	NON_SYNONYMOUS_CODING	MODERATE	MISSENSE	aAg/aCg	K12T	c.35A>C	Olfr1440	ENSMUST00000054567	1	0.3500
B16F10 ATCC	chr19	12862284	.	T	C	NON_SYNONYMOUS_CODING	MODERATE	MISSENSE	Tgt/Cgt	C170R	c.508T>C	Olfr1444	ENSMUST00000059675	1	0.3608
B16F10 ATCC	chr19	13028027	.	A	C	NON_SYNONYMOUS_CODING	MODERATE	MISSENSE	Ttt/Gtt	F101V	c.301T>G	Olfr1453	ENSMUST00000087773	1	0.3108
B16F10 ATCC	chr9	39018789	.	A	C	NON_SYNONYMOUS_CODING	MODERATE	MISSENSE	Ttt/Gtt	F251V	c.751T>G	Olfr146	ENSMUST00000073671	1	0.2314
B16F10 ATCC	chr19	13445849	.	T	C	NON_SYNONYMOUS_CODING	MODERATE	MISSENSE	gTc/gCc	V279A	c.836T>C	Olfr1471	ENSMUST00000096203	1	0.2198
B16F10 ATCC	chr19	13529852	.	T	G	NON_SYNONYMOUS_CODING	MODERATE	MISSENSE	Ttt/Gtt	F60V	c.178T>G	Olfr1480	ENSMUST00000072219	1	0.3653
B16F10 ATCC	chr19	13633453	.	C	A	NON_SYNONYMOUS_CODING	MODERATE	MISSENSE	gCa/gAa	A114E	c.341C>A	Olfr1489	ENSMUST00000053113	1	0.3777
B16F10 ATCC	chr19	13768416	.	C	A	NON_SYNONYMOUS_CODING	MODERATE	MISSENSE	Ccg/Acg	P25T	c.73C>A	Olfr1495	ENSMUST00000061669	1	0.3659
B16F10 ATCC	chr19	13815548	.	A	C	NON_SYNONYMOUS_CODING	MODERATE	MISSENSE	cTt/cGt	L14R	c.41T>G	Olfr1499	ENSMUST00000055672	1	0.3889
B16F10 ATCC	chr14	52451209	.	C	A	NON_SYNONYMOUS_CODING	MODERATE	MISSENSE	ttC/ttA	F265L	c.795C>A	Olfr1509	ENSMUST00000045066	1	0.3273
B16F10 ATCC	chr2	87782628	.	G	T	NON_SYNONYMOUS_CODING	MODERATE	MISSENSE	ttG/ttT	L31F	c.93G>T	Olfr152	ENSMUST00000090709	1	0.2233
B16F10 ATCC	chr2	85663616	.	C	T	NON_SYNONYMOUS_CODING	MODERATE	MISSENSE	Gtt/Att	V273I	c.817G>A	Olfr154	ENSMUST00000099918	1	0.2735
B16F10 ATCC	chr1	172957324	.	T	A	NON_SYNONYMOUS_CODING	MODERATE	MISSENSE	ttT/ttA	F176L	c.528T>A	Olfr16	ENSMUST00000038432	1	0.4846
B16F10 ATCC	chr16	19487048	.	T	C	NON_SYNONYMOUS_CODING	MODERATE	MISSENSE	cTg/cCg	L70P	c.209T>C	Olfr166	ENSMUST00000074739	1	0.1862
B16F10 ATCC	chr11	73941138	.	G	A	NON_SYNONYMOUS_CODING	MODERATE	MISSENSE	atG/atA	M297I	c.891G>A	Olfr23	ENSMUST00000092917	1	0.1992
B16F10 ATCC	chr1	174117315	.	C	T	NON_SYNONYMOUS_CODING	MODERATE	MISSENSE	Gca/Aca	A234T	c.700G>A	Olfr231	ENSMUST00000063030	1	0.1920
B16F10 ATCC	chr3	106822187	.	T	C	NON_SYNONYMOUS_CODING	MODERATE	MISSENSE	gAc/gGc	D124G	c.371A>G	Olfr266	ENSMUST00000059486	1	0.1908
B16F10 ATCC	chr7	86465746	.	T	A	NON_SYNONYMOUS_CODING	MODERATE	MISSENSE	Ttt/Att	F112I	c.334T>A	Olfr299	ENSMUST00000057734	1	0.2671
B16F10 ATCC	chr11	58702149	.	G	A	STOP_GAINED	HIGH	NONSENSE	tgG/tgA	W149*	c.447G>A	Olfr319	ENSMUST00000076965	1	0.2068
B16F10 ATCC	chr11	58552146	.	A	T	NON_SYNONYMOUS_CODING	MODERATE	MISSENSE	tTt/tAt	F31Y	c.92T>A	Olfr328	ENSMUST00000073933	1	0.2142
B16F10 ATCC	chr2	36452906	.	T	G	NON_SYNONYMOUS_CODING	MODERATE	MISSENSE	tTt/tGt	F107C	c.320T>G	Olfr340	ENSMUST00000072854	1	0.2175
B16F10 ATCC	chr2	36869950	.	C	T	NON_SYNONYMOUS_CODING	MODERATE	MISSENSE	gCc/gTc	A128V	c.383C>T	Olfr352	ENSMUST00000065416	1	0.2331
B16F10 ATCC	chr2	36997705	.	A	C	NON_SYNONYMOUS_CODING	MODERATE	MISSENSE	aaA/aaC	K298N	c.894A>C	Olfr357	ENSMUST00000069578	1	0.2427
B16F10 ATCC	chr2	37005549	.	C	A	STOP_GAINED	HIGH	NONSENSE	Gag/Tag	E22*	c.64G>T	Olfr358	ENSMUST00000100146	1	0.2321
B16F10 ATCC	chr2	37146385	.	T	G	NON_SYNONYMOUS_CODING	MODERATE	MISSENSE	Ttc/Gtc	F58V	c.172T>G	Olfr364-ps1	ENSMUST00000104995	1	0.2429
B16F10 ATCC	chr11	73425105	.	T	C	NON_SYNONYMOUS_CODING	MODERATE	MISSENSE	Agt/Ggt	S293G	c.877A>G	Olfr378	ENSMUST00000069790	2	0.2426
B16F10 ATCC	chr11	74334692	.	A	T	NON_SYNONYMOUS_CODING	MODERATE	MISSENSE	Ttc/Atc	F180I	c.538T>A	Olfr410	ENSMUST00000052254	1	0.2049
B16F10 ATCC	chr1	174369744	.	G	A	NON_SYNONYMOUS_CODING	MODERATE	MISSENSE	Gtc/Atc	V276I	c.826G>A	Olfr417	ENSMUST00000085862	1	0.2393
B16F10 ATCC	chr1	174069949	.	C	T	NON_SYNONYMOUS_CODING	MODERATE	MISSENSE	tCt/tTt	S217F	c.650C>T	Olfr430	ENSMUST00000055873	1	0.2727
B16F10 ATCC	chr6	42897152	.	A	T	STOP_GAINED	HIGH	NONSENSE	Aga/Tga	R234*	c.700A>T	Olfr448	ENSMUST00000058668	1	0.1560
B16F10 ATCC	chr6	42817686	.	G	T	NON_SYNONYMOUS_CODING	MODERATE	MISSENSE	Gat/Tat	D72Y	c.214G>T	Olfr450	ENSMUST00000067503	1	0.1594
B16F10 ATCC	chr6	42471653	.	T	G	NON_SYNONYMOUS_CODING	MODERATE	MISSENSE	aAc/aCc	N175T	c.524A>C	Olfr457	ENSMUST00000170504	1	0.1466
B16F10 ATCC	chr7	107990731	.	G	A	NON_SYNONYMOUS_CODING	MODERATE	MISSENSE	cGc/cAc	R122H	c.365G>A	Olfr477	ENSMUST00000091605	1	0.2310
B16F10 ATCC	chr7	108066327	.	C	A	NON_SYNONYMOUS_CODING	MODERATE	MISSENSE	tGc/tTc	C157F	c.470G>T	Olfr480	ENSMUST00000071658	1	0.1512
B16F10 ATCC	chr7	108523398	.	A	C	NON_SYNONYMOUS_CODING	MODERATE	MISSENSE	tTt/tGt	F184C	c.551T>G	Olfr502	ENSMUST00000078933	1	0.2667
B16F10 ATCC	chr7	108713538	.	T	G	NON_SYNONYMOUS_CODING	MODERATE	MISSENSE	Ttc/Gtc	F62V	c.184T>G	Olfr512	ENSMUST00000074730	1	0.2222
B16F10 ATCC	chr7	108755104	.	T	G	NON_SYNONYMOUS_CODING	MODERATE	MISSENSE	Tta/Gta	L83V	c.247T>G	Olfr513	ENSMUST00000055146	1	0.5537
B16F10 ATCC	chr7	108825896	.	A	C	STOP_GAINED	HIGH	NONSENSE	taT/taG	Y34*	c.102T>G	Olfr514	ENSMUST00000084754	1	0.3521
B16F10 ATCC	chr7	108893773	.	G	T	NON_SYNONYMOUS_CODING	MODERATE	MISSENSE	ttC/ttA	F216L	c.648C>A	Olfr519	ENSMUST00000084752	1	0.2324
B16F10 ATCC	chr7	140652798	.	G	A	NON_SYNONYMOUS_CODING	MODERATE	MISSENSE	aGc/aAc	S273N	c.818G>A	Olfr53	ENSMUST00000084456	2	0.2369
B16F10 ATCC	chr7	140503805	.	A	C	NON_SYNONYMOUS_CODING	MODERATE	MISSENSE	gTc/gGc	V218G	c.653T>G	Olfr536	ENSMUST00000064392	4	0.2464
B16F10 ATCC	chr11	74288835	.	T	C	NON_SYNONYMOUS_CODING	MODERATE	MISSENSE	cTt/cCt	L63P	c.188T>C	Olfr59	ENSMUST00000119717	2	0.2747
B16F10 ATCC	chr7	103172806	.	A	G	NON_SYNONYMOUS_CODING	MODERATE	MISSENSE	cTt/cCt	L277P	c.830T>C	Olfr591	ENSMUST00000074272	1	0.3152
B16F10 ATCC	chr7	140345804	.	A	G	NON_SYNONYMOUS_CODING	MODERATE	MISSENSE	Ttt/Ctt	F62L	c.184T>C	Olfr60	ENSMUST00000075470	1	0.1971
B16F10 ATCC	chr7	140638220	.	A	G	NON_SYNONYMOUS_CODING	MODERATE	MISSENSE	aAg/aGg	K173R	c.518A>G	Olfr61	ENSMUST00000084455	1	0.2123
B16F10 ATCC	chr7	103561059	.	A	G	NON_SYNONYMOUS_CODING	MODERATE	MISSENSE	aAg/aGg	K194R	c.581A>G	Olfr615	ENSMUST00000098198	1	0.1959
B16F10 ATCC	chr7	103561390	.	G	C	NON_SYNONYMOUS_CODING	MODERATE	MISSENSE	ttG/ttC	L304F	c.912G>C	Olfr615	ENSMUST00000098198	1	0.2164
B16F10 ATCC	chr7	103683186	.	T	G	NON_SYNONYMOUS_CODING	MODERATE	MISSENSE	aTt/aGt	I156S	c.467T>G	Olfr625-ps1	ENSMUST00000098195	1	0.2287
B16F10 ATCC	chr7	104059316	.	A	C	NON_SYNONYMOUS_CODING	MODERATE	MISSENSE	agT/agG	S95R	c.285T>G	Olfr643	ENSMUST00000074064	1	0.2577
B16F10 ATCC	chr7	104881268	.	C	T	NON_SYNONYMOUS_CODING	MODERATE	MISSENSE	gCt/gTt	A187V	c.560C>T	Olfr665	ENSMUST00000098165	1	0.2486
B16F10 ATCC	chr7	104916666	.	G	T	NON_SYNONYMOUS_CODING	MODERATE	MISSENSE	gCa/gAa	A210E	c.629C>A	Olfr667	ENSMUST00000071362	1	0.2440
B16F10 ATCC	chr7	103787365	.	T	G	NON_SYNONYMOUS_CODING	MODERATE	MISSENSE	aAg/aCg	K304T	c.911A>C	Olfr67	ENSMUST00000183254	1	0.1951
B16F10 ATCC	chr7	104996454	.	C	A	NON_SYNONYMOUS_CODING	MODERATE	MISSENSE	gGa/gTa	G150V	c.449G>T	Olfr672	ENSMUST00000050599	1	0.2532
B16F10 ATCC	chr7	105127047	.	G	A	NON_SYNONYMOUS_CODING	MODERATE	MISSENSE	Ctt/Ttt	L75F	c.223C>T	Olfr682-ps1	ENSMUST00000071242	2	0.2261
B16F10 ATCC	chr7	106678457	.	T	G	NON_SYNONYMOUS_CODING	MODERATE	MISSENSE	Agt/Cgt	S10R	c.28A>C	Olfr693	ENSMUST00000057817	1	0.2280
B16F10 ATCC	chr7	106741143	.	A	T	NON_SYNONYMOUS_CODING	MODERATE	MISSENSE	Tcc/Acc	S264T	c.790T>A	Olfr697	ENSMUST00000050541	1	0.2778
B16F10 ATCC	chr7	106886296	.	T	A	NON_SYNONYMOUS_CODING	MODERATE	MISSENSE	Att/Ttt	I174F	c.520A>T	Olfr706	ENSMUST00000052535	1	0.4978
B16F10 ATCC	chr7	107074405	.	C	A	NON_SYNONYMOUS_CODING	MODERATE	MISSENSE	gaC/gaA	D192E	c.576C>A	Olfr714	ENSMUST00000054629	1	0.2515
B16F10 ATCC	chr7	107148212	.	A	C	NON_SYNONYMOUS_CODING	MODERATE	MISSENSE	Agt/Cgt	S299R	c.895A>C	Olfr716	ENSMUST00000098137	1	0.5160
B16F10 ATCC	chr14	50414187	.	AT	A	FRAME_SHIFT	HIGH		ttt/	F217fs	c.651delT	Olfr738	ENSMUST00000058972	1	0.3273
B16F10 ATCC	chr14	50515527	.	T	C	NON_SYNONYMOUS_CODING	MODERATE	MISSENSE	Ttc/Ctc	F108L	c.322T>C	Olfr742	ENSMUST00000089836	1	0.3160
B16F10 ATCC	chr9	19920712	.	T	A	NON_SYNONYMOUS_CODING	MODERATE	MISSENSE	Ttc/Atc	F168I	c.502T>A	Olfr77	ENSMUST00000057596	3	0.2077
B16F10 ATCC	chr10	129133075	.	T	G	NON_SYNONYMOUS_CODING	MODERATE	MISSENSE	aAa/aCa	K231T	c.692A>C	Olfr770	ENSMUST00000062314	1	0.2813
B16F10 ATCC	chr10	129755339	.	A	C	NON_SYNONYMOUS_CODING	MODERATE	MISSENSE	aTc/aGc	I37S	c.110T>G	Olfr807	ENSMUST00000059038	1	0.3333
B16F10 ATCC	chr10	129902683	.	T	C	NON_SYNONYMOUS_CODING	MODERATE	MISSENSE	gAg/gGg	E15G	c.44A>G	Olfr815	ENSMUST00000071557	1	0.2945
B16F10 ATCC	chr10	130033788	.	A	C	NON_SYNONYMOUS_CODING	MODERATE	MISSENSE	aAg/aCg	K54T	c.161A>C	Olfr821	ENSMUST00000054364	1	0.2065
B16F10 ATCC	chr9	18945421	.	G	A	NON_SYNONYMOUS_CODING	MODERATE	MISSENSE	Gtt/Att	V258I	c.772G>A	Olfr832	ENSMUST00000060601	1	0.2522
B16F10 ATCC	chr9	19375684	.	G	A	NON_SYNONYMOUS_CODING	MODERATE	MISSENSE	Ctt/Ttt	L66F	c.196C>T	Olfr847	ENSMUST00000079620	1	0.2113
B16F10 ATCC	chr9	20027279	.	A	G	NON_SYNONYMOUS_CODING	MODERATE	MISSENSE	Tca/Cca	S220P	c.658T>C	Olfr866	ENSMUST00000062248	1	0.5504
B16F10 ATCC	chr9	37773355	.	G	A	NON_SYNONYMOUS_CODING	MODERATE	MISSENSE	gGc/gAc	G232D	c.695G>A	Olfr875	ENSMUST00000080634	1	0.2738
B16F10 ATCC	chr9	37855318	.	A	C	NON_SYNONYMOUS_CODING	MODERATE	MISSENSE	Agc/Cgc	S167R	c.499A>C	Olfr877	ENSMUST00000086063	1	0.5510
B16F10 ATCC	chr9	38109586	.	T	C	NON_SYNONYMOUS_CODING	MODERATE	MISSENSE	gTc/gCc	V300A	c.899T>C	Olfr888	ENSMUST00000075228	1	0.2166
B16F10 ATCC	chr9	38268612	.	T	C	NON_SYNONYMOUS_CODING	MODERATE	MISSENSE	tTa/tCa	L33S	c.98T>C	Olfr895	ENSMUST00000093864	1	0.2919
B16F10 ATCC	chr9	38539149	.	T	C	NON_SYNONYMOUS_CODING	MODERATE	MISSENSE	Ttt/Ctt	F85L	c.253T>C	Olfr910	ENSMUST00000073214	2	0.2520
B16F10 ATCC	chr9	38523859	.	T	G	NON_SYNONYMOUS_CODING	MODERATE	MISSENSE	aaT/aaG	N42K	c.126T>G	Olfr911-ps1	ENSMUST00000074987	1	0.2485
B16F10 ATCC	chr9	39257871	.	G	A	NON_SYNONYMOUS_CODING	MODERATE	MISSENSE	tCg/tTg	S270L	c.809C>T	Olfr945	ENSMUST00000076903	1	0.1810
B16F10 ATCC	chr9	39470082	.	T	G	NON_SYNONYMOUS_CODING	MODERATE	MISSENSE	Att/Ctt	I215L	c.643A>C	Olfr955	ENSMUST00000073946	1	0.2550
B16F10 ATCC	chr9	39956438	.	A	C	NON_SYNONYMOUS_CODING	MODERATE	MISSENSE	Tta/Gta	L178V	c.532T>G	Olfr976	ENSMUST00000169307	1	0.2830
B16F10 ATCC	chr9	40006596	.	A	G	NON_SYNONYMOUS_CODING	MODERATE	MISSENSE	Tcc/Ccc	S118P	c.352T>C	Olfr980	ENSMUST00000073932	1	0.5407
B16F10 ATCC	chr11	79502320	.	G	C	NON_SYNONYMOUS_CODING	MODERATE	MISSENSE	aaC/aaG	N237K	c.711C>G	Omg	ENSMUST00000164465	2	0.4521
B16F10 ATCC	chr4	144158307	.	T	A	NON_SYNONYMOUS_CODING	MODERATE	MISSENSE	aAt/aTt	N353I	c.1058A>T	Oog3	ENSMUST00000050933	4	0.5372
B16F10 ATCC	chr4	144159636	.	A	G	NON_SYNONYMOUS_CODING	MODERATE	MISSENSE	Ttt/Ctt	F131L	c.391T>C	Oog3	ENSMUST00000050933	3	0.2932
B16F10 ATCC	chr1	133898337	.	C	T	SPLICE_SITE_REGION+INTRON	LOW				c.975+5G>A	Optc	ENSMUST00000124051	6	0.3421
B16F10 ATCC	chr1	58476516	.	A	C	NON_SYNONYMOUS_CODING	MODERATE	MISSENSE	Ttt/Gtt	F278V	c.832T>G	Orc2	ENSMUST00000027198	11	0.3107
B16F10 ATCC	chr6	50297097	.	A	G	NON_SYNONYMOUS_CODING	MODERATE	MISSENSE	Ttt/Ctt	F877L	c.2629T>C	Osbpl3	ENSMUST00000090019	22	0.3561
B16F10 ATCC	chr5	122652848	.	T	G	NON_SYNONYMOUS_CODING	MODERATE	MISSENSE	Tta/Gta	L83V	c.247T>G	P2rx7	ENSMUST00000100737	2	0.2469
B16F10 ATCC	chr2	164032324	.	G	C	SPLICE_SITE_REGION+INTRON	LOW				c.643+5G>C	Pabpc1l	ENSMUST00000067715	4	0.4627
B16F10 ATCC	chr10	87571291	.	C	T	NON_SYNONYMOUS_CODING	MODERATE	MISSENSE	tCt/tTt	S303F	c.908C>T	Pah	ENSMUST00000020241	8	0.2800
B16F10 ATCC	chr10	87583524	.	T	A	SPLICE_SITE_REGION+INTRON	LOW				c.1316-8T>A	Pah	ENSMUST00000020241	12	0.9948
B16F10 ATCC	chr6	83808882	.	T	G	NON_SYNONYMOUS_CODING	MODERATE	MISSENSE	aAc/aCc	N122T	c.365A>C	Paip2b	ENSMUST00000058383	5	0.2217
B16F10 ATCC	chr2	118689860	.	G	C	NON_SYNONYMOUS_CODING	MODERATE	MISSENSE	Gca/Cca	A111P	c.331G>C	Pak6	ENSMUST00000099557	5	0.2400
B16F10 ATCC	chr2	102634446	.	C	A	NON_SYNONYMOUS_CODING	MODERATE	MISSENSE	ttC/ttA	F313L	c.939C>A	Pamr1	ENSMUST00000028612	7	0.2745
B16F10 ATCC	chr12	83776376	.	C	G	NON_SYNONYMOUS_CODING	MODERATE	MISSENSE	Ccc/Gcc	P396A	c.1186C>G	Papln	ENSMUST00000121733	13	0.3000
B16F10 ATCC	chr3	131642967	.	C	G	NON_SYNONYMOUS_CODING	MODERATE	MISSENSE	caC/caG	H580Q	c.1740C>G	Papss1	ENSMUST00000029666	12	0.1930
B16F10 ATCC	chr16	35841586	.	C	G	NON_SYNONYMOUS_CODING	MODERATE	MISSENSE	Gat/Cat	D1360H	c.4078G>C	Parp14	ENSMUST00000042665	13	0.2698
B16F10 ATCC	chr1	93316801	.	C	T	NON_SYNONYMOUS_CODING	MODERATE	MISSENSE	aGt/aAt	S1166N	c.3497G>A	Pask	ENSMUST00000027493	14	0.1754
B16F10 ATCC	chr14	65813948	.	T	A	NON_SYNONYMOUS_CODING	MODERATE	MISSENSE	gTt/gAt	V145D	c.434T>A	Pbk	ENSMUST00000022612	5	0.3631
B16F10 ATCC	chr14	31110454	.	G	A	NON_SYNONYMOUS_CODING	MODERATE	MISSENSE	cGa/cAa	R1458Q	c.4373G>A	Pbrm1	ENSMUST00000112098	29	0.4000
B16F10 ATCC	chr10	76763323	.	C	A	NON_SYNONYMOUS_CODING	MODERATE	MISSENSE	caG/caT	Q326H	c.978G>T	Pcbp3	ENSMUST00000001148	15	0.3433
B16F10 ATCC	chr14	84448274	.	A	G	NON_SYNONYMOUS_CODING	MODERATE	MISSENSE	aAg/aGg	K727R	c.2180A>G	Pcdh17	ENSMUST00000071370	1	0.4590
B16F10 ATCC	chr5	57719682	.	G	C	NON_SYNONYMOUS_CODING	MODERATE	MISSENSE	gGc/gCc	G193A	c.578G>C	Pcdh7	ENSMUST00000191837	1	0.2581
B16F10 ATCC	chr18	36969217	.	G	A	NON_SYNONYMOUS_CODING	MODERATE	MISSENSE	Gcg/Acg	A488T	c.1462G>A	Pcdha6	ENSMUST00000193777	1	0.3267
B16F10 ATCC	chr18	36941121	.	G	T	NON_SYNONYMOUS_CODING	MODERATE	MISSENSE	Ggt/Tgt	G602C	c.1804G>T	PCDHA9	ENSMUST00000115662	1	0.3500
B16F10 ATCC	chr18	37092190	.	G	T	NON_SYNONYMOUS_CODING	MODERATE	MISSENSE	ttG/ttT	L685F	c.2055G>T	PCDHA9	ENSMUST00000007584	1	0.2545
B16F10 ATCC	chr18	37092566	.	G	T	NON_SYNONYMOUS_CODING	MODERATE	MISSENSE	Gcc/Tcc	A811S	c.2431G>T	PCDHA9	ENSMUST00000007584	1	0.3529
B16F10 ATCC	chr18	37514541	.	A	G	NON_SYNONYMOUS_CODING	MODERATE	MISSENSE	gAa/gGa	E241G	c.722A>G	Pcdhb21	ENSMUST00000061405	1	0.3759
B16F10 ATCC	chr18	37519345	.	A	C	NON_SYNONYMOUS_CODING	MODERATE	MISSENSE	Act/Cct	T289P	c.865A>C	Pcdhb22	ENSMUST00000192409	1	0.3435
B16F10 ATCC	chr18	37335146	.	T	A	NON_SYNONYMOUS_CODING	MODERATE	MISSENSE	gaT/gaA	D373E	c.1119T>A	Pcdhb6	ENSMUST00000061717	1	0.6768
B16F10 ATCC	chr18	37756184	.	G	C	NON_SYNONYMOUS_CODING	MODERATE	MISSENSE	Ggc/Cgc	G82R	c.244G>C	PCDHGB6	ENSMUST00000061279	1	0.2810
B16F10 ATCC	chr18	37808963	.	GC	G	FRAME_SHIFT	HIGH		cct/	P808fs	c.2423delC	PCDHGB6	ENSMUST00000076807	1	0.2308
B16F10 ATCC	chr5	14713153	.	T	C	NON_SYNONYMOUS_CODING	MODERATE	MISSENSE	tTa/tCa	L3880S	c.11639T>C	Pclo	ENSMUST00000030691	7	0.2385
B16F10 ATCC	chr1	7163330	.	C	T	NON_SYNONYMOUS_CODING	MODERATE	MISSENSE	cCt/cTt	P222L	c.665C>T	Pcmtd1	ENSMUST00000061280	5	0.4818
B16F10 ATCC	chr8	125826928	.	C	T	NON_SYNONYMOUS_CODING	MODERATE	MISSENSE	Gag/Aag	E1151K	c.3451G>A	Pcnxl2	ENSMUST00000047239	19	0.1343
B16F10 ATCC	chr8	125866018	.	T	G	NON_SYNONYMOUS_CODING	MODERATE	MISSENSE	Agt/Cgt	S736R	c.2206A>C	Pcnxl2	ENSMUST00000047239	9	0.3297
B16F10 ATCC	chr19	17463374	.	A	G	NON_SYNONYMOUS_CODING	MODERATE	MISSENSE	cTc/cCc	L1284P	c.3851T>C	Pcsk5	ENSMUST00000025618	30	0.2727
B16F10 ATCC	chr6	56180175	.	C	G	NON_SYNONYMOUS_CODING	MODERATE	MISSENSE	Gcc/Ccc	A107P	c.319G>C	Pde1c	ENSMUST00000044505	4	0.1693
B16F10 ATCC	chr5	75166577	.	C	T	NON_SYNONYMOUS_CODING	MODERATE	MISSENSE	tCt/tTt	S145F	c.434C>T	Pdgfra	ENSMUST00000000476	4	0.2536
B16F10 ATCC	chr2	103022237	.	T	C	NON_SYNONYMOUS_CODING	MODERATE	MISSENSE	gAg/gGg	E427G	c.1280A>G	Pdhx	ENSMUST00000011058	11	0.2800
B16F10 ATCC	chr6	5491647	.	T	G	NON_SYNONYMOUS_CODING	MODERATE	MISSENSE	aAc/aCc	N187T	c.560A>C	Pdk4	ENSMUST00000019721	5	0.1164
B16F10 ATCC	chr8	111129652	.	C	T	NON_SYNONYMOUS_CODING	MODERATE	MISSENSE	aCg/aTg	T669M	c.2006C>T	Pdpr	ENSMUST00000039333	16	0.2400
B16F10 ATCC	chr2	153014037	.	C	T	NON_SYNONYMOUS_CODING	MODERATE	MISSENSE	Gcc/Acc	A46T	c.136G>A	Pdrg1	ENSMUST00000028972	2	0.1923
B16F10 ATCC	chr5	65618986	.	A	C	NON_SYNONYMOUS_CODING	MODERATE	MISSENSE	atT/atG	I1204M	c.3612T>G	Pds5a	ENSMUST00000031104	31	0.2436
B16F10 ATCC	chr3	96854528	.	T	C	SPLICE_SITE_REGION+INTRON	LOW				c.461-6T>C	Pdzk1	ENSMUST00000058865	3	0.2808
B16F10 ATCC	chr6	101172379	.	C	A	NON_SYNONYMOUS_CODING	MODERATE	MISSENSE	gaG/gaT	E329D	c.987G>T	Pdzrn3	ENSMUST00000075994	4	0.1409
B16F10 ATCC	chr11	70396890	.	A	G	NON_SYNONYMOUS_CODING	MODERATE	MISSENSE	cTg/cCg	L402P	c.1205T>C	Pelp1	ENSMUST00000019065	11	0.2390
B16F10 ATCC	chr1	91440828	.	T	G	SPLICE_SITE_REGION+INTRON	LOW				c.818+4A>C	Per2	ENSMUST00000069620	7	0.2500
B16F10 ATCC	chrX	89406337	.	A	G	NON_SYNONYMOUS_CODING	MODERATE	MISSENSE	gTt/gCt	V62A	c.185T>C	Pet2	ENSMUST00000113959	12	0.6000
B16F10 ATCC	chr5	3606075	.	G	A	NON_SYNONYMOUS_CODING	MODERATE	MISSENSE	Gct/Act	A301T	c.901G>A	Pex1	ENSMUST00000121291	5	0.2367
B16F10 ATCC	chr17	46712222	.	A	T	NON_SYNONYMOUS_CODING	MODERATE	MISSENSE	caA/caT	Q241H	c.723A>T	Pex6	ENSMUST00000002840	1	0.3421
B16F10 ATCC	chr11	69000325	.	G	T	NON_SYNONYMOUS_CODING	MODERATE	MISSENSE	tCt/tAt	S289Y	c.866C>A	Pfas	ENSMUST00000021282	8	0.1613
B16F10 ATCC	chr17	47732425	.	G	A	NON_SYNONYMOUS_CODING	MODERATE	MISSENSE	Gtg/Atg	V233M	c.697G>A	Pgc	ENSMUST00000024782	6	0.2121
B16F10 ATCC	chr9	86564707	.	A	G	NON_SYNONYMOUS_CODING	MODERATE	MISSENSE	Ttt/Ctt	F253L	c.757T>C	Pgm3	ENSMUST00000070064	6	0.1842
B16F10 ATCC	chr6	122322342	.	T	C	NON_SYNONYMOUS_CODING	MODERATE	MISSENSE	gAg/gGg	E681G	c.2042A>G	Phc1	ENSMUST00000079560	8	0.1697
B16F10 ATCC	chr1	30824358	.	A	G	NON_SYNONYMOUS_CODING	MODERATE	MISSENSE	aTt/aCt	I762T	c.2285T>C	Phf3	ENSMUST00000088310	4	0.1407
B16F10 ATCC	chr2	30274474	.	A	G	NON_SYNONYMOUS_CODING	MODERATE	MISSENSE	aAg/aGg	K86R	c.257A>G	Phyhd1	ENSMUST00000091132	4	0.2458
B16F10 ATCC	chr5	52760931	.	G	A	NON_SYNONYMOUS_CODING	MODERATE	MISSENSE	cGa/cAa	R367Q	c.1100G>A	Pi4k2b	ENSMUST00000031081	8	0.5200
B16F10 ATCC	chr3	94984509	.	T	G	NON_SYNONYMOUS_CODING	MODERATE	MISSENSE	Ttt/Gtt	F179V	c.535T>G	Pi4kb	ENSMUST00000125476	2	0.1630
B16F10 ATCC	chr8	122485610	.	A	AGAT	CODON_INSERTION	MODERATE		atc/atcATC	I1991dup	c.5971_5973dupATC	Piezo1	ENSMUST00000067252	41	0.1799
B16F10 ATCC	chr18	63069994	.	C	T	NON_SYNONYMOUS_CODING	MODERATE	MISSENSE	gGc/gAc	G1525D	c.4574G>A	Piezo2	ENSMUST00000047480	31	0.3023
B16F10 ATCC	chrX	164422909	.	A	C	NON_SYNONYMOUS_CODING	MODERATE	MISSENSE	aaA/aaC	K88N	c.264A>C	Piga	ENSMUST00000033754	2	1.0000
B16F10 ATCC	chr4	43019409	.	G	C	NON_SYNONYMOUS_CODING	MODERATE	MISSENSE	Ccc/Gcc	P970A	c.2908C>G	Pigo	ENSMUST00000098109	8	0.2500
B16F10 ATCC	chr1	133067042	.	C	T	NON_SYNONYMOUS_CODING	MODERATE	MISSENSE	tCg/tTg	S248L	c.743C>T	Pik3c2b	ENSMUST00000077730	2	0.2233
B16F10 ATCC	chr11	68525602	.	G	A	NON_SYNONYMOUS_CODING+SPLICE_SITE_REGION	MODERATE	MISSENSE	Gtg/Atg	V6M	c.16G>A	Pik3r6	ENSMUST00000060441	3	0.2533
B16F10 ATCC	chr11	68529885	.	C	A	SPLICE_SITE_REGION+INTRON	LOW				c.462-7C>A	Pik3r6	ENSMUST00000060441	7	0.1481
B16F10 ATCC	chr9	14734517	.	G	A	NON_SYNONYMOUS_CODING	MODERATE	MISSENSE	Cac/Tac	H205Y	c.613C>T	Piwil4	ENSMUST00000076946	4	0.2941
B16F10 ATCC	chr17	24565605	.	T	G	NON_SYNONYMOUS_CODING	MODERATE	MISSENSE	cTt/cGt	L375R	c.1124T>G	Pkd1	ENSMUST00000035565	5	0.6000
B16F10 ATCC	chr5	104498861	.	T	G	NON_SYNONYMOUS_CODING	MODERATE	MISSENSE	Ttg/Gtg	L780V	c.2338T>G	Pkd2	ENSMUST00000086831	12	0.2816
B16F10 ATCC	chr17	83222150	.	A	G	NON_SYNONYMOUS_CODING	MODERATE	MISSENSE	gAg/gGg	E380G	c.1139A>G	Pkdcc	ENSMUST00000170794	5	0.4130
B16F10 ATCC	chr1	20312178	.	G	A	NON_SYNONYMOUS_CODING	MODERATE	MISSENSE	aCc/aTc	T2583I	c.7748C>T	Pkhd1	ENSMUST00000088448	49	0.1667
B16F10 ATCC	chr3	129890380	.	C	T	NON_SYNONYMOUS_CODING	MODERATE	MISSENSE	tCc/tTc	S136F	c.407C>T	Pla2g12a	ENSMUST00000029629	3	0.2533
B16F10 ATCC	chr4	138734286	.	T	C	NON_SYNONYMOUS_CODING	MODERATE	MISSENSE	tTc/tCc	F22S	c.65T>C	Pla2g2c	ENSMUST00000030530	4	0.4590
B16F10 ATCC	chr7	13329753	.	A	T	NON_SYNONYMOUS_CODING	MODERATE	MISSENSE	caA/caT	Q48H	c.144A>T	Pla2g4c	ENSMUST00000108528	2	0.3519
B16F10 ATCC	chr5	32310847	.	T	G	NON_SYNONYMOUS_CODING	MODERATE	MISSENSE	Ttt/Gtt	F503V	c.1507T>G	Plb1	ENSMUST00000101376	23	0.2783
B16F10 ATCC	chr5	32310917	.	C	T	NON_SYNONYMOUS_CODING+SPLICE_SITE_REGION	MODERATE	MISSENSE	tCg/tTg	S526L	c.1577C>T	Plb1	ENSMUST00000101376	23	0.2473
B16F10 ATCC	chr2	135220846	.	A	C	NON_SYNONYMOUS_CODING	MODERATE	MISSENSE	gaA/gaC	E125D	c.375A>C	Plcb1	ENSMUST00000110116	4	0.2763
B16F10 ATCC	chr17	50606992	.	C	A	NON_SYNONYMOUS_CODING	MODERATE	MISSENSE	cCt/cAt	P343H	c.1028C>A	Plcl2	ENSMUST00000043938	2	0.2394
B16F10 ATCC	chr3	28029243	.	A	C	NON_SYNONYMOUS_CODING	MODERATE	MISSENSE	Atc/Ctc	I171L	c.511A>C	Pld1	ENSMUST00000123539	5	0.2059
B16F10 ATCC	chr15	76188541	.	C	T	NON_SYNONYMOUS_CODING	MODERATE	MISSENSE	Gag/Aag	E779K	c.2335G>A	Plec	ENSMUST00000073418	17	0.1750
B16F10 ATCC	chr2	76690438	.	T	C	SPLICE_SITE_REGION+INTRON	LOW				c.616-7T>C	Plekha3	ENSMUST00000111920	5	0.2500
B16F10 ATCC	chr9	92603035	.	T	G	NON_SYNONYMOUS_CODING	MODERATE	MISSENSE	Ttc/Gtc	F551V	c.1651T>G	Plod2	ENSMUST00000160359	15	0.2418
B16F10 ATCC	chr1	194644441	.	A	C	NON_SYNONYMOUS_CODING	MODERATE	MISSENSE	Att/Ctt	I228L	c.682A>C	Plxna2	ENSMUST00000027952	2	0.2083
B16F10 ATCC	chr1	194764539	.	A	G	NON_SYNONYMOUS_CODING	MODERATE	MISSENSE	Aat/Gat	N786D	c.2356A>G	Plxna2	ENSMUST00000027952	11	0.2605
B16F10 ATCC	chr8	109513944	.	A	C	NON_SYNONYMOUS_CODING	MODERATE	MISSENSE	gaA/gaC	E219D	c.657A>C	Pmfbp1	ENSMUST00000034162	5	0.1905
B16F10 ATCC	chr9	58234590	.	G	T	NON_SYNONYMOUS_CODING	MODERATE	MISSENSE	Ctg/Atg	L320M	c.958C>A	Pml	ENSMUST00000085673	3	0.5714
B16F10 ATCC	chr19	58762325	.	G	A	NON_SYNONYMOUS_CODING	MODERATE	MISSENSE	Gcc/Acc	A149T	c.445G>A	Pnliprp2	ENSMUST00000026081	4	0.2644
B16F10 ATCC	chr14	50951495	.	T	G	NON_SYNONYMOUS_CODING	MODERATE	MISSENSE	gaT/gaG	D248E	c.744T>G	Pnp	ENSMUST00000048615	6	0.3030
B16F10 ATCC	chr15	84123071	.	A	G	NON_SYNONYMOUS_CODING	MODERATE	MISSENSE	Tca/Cca	S15P	c.43T>C	Pnpla5	ENSMUST00000019012	1	0.2821
B16F10 ATCC	chr4	33246371	.	G	A	NON_SYNONYMOUS_CODING	MODERATE	MISSENSE	aCc/aTc	T196I	c.587C>T	Pnrc1	ENSMUST00000049357	2	0.2605
B16F10 ATCC	chr3	94879076	.	T	A	NON_SYNONYMOUS_CODING	MODERATE	MISSENSE	Ttt/Att	F992I	c.2974T>A	Pogz	ENSMUST00000107270	19	0.6136
B16F10 ATCC	chr5	110327865	.	C	T	NON_SYNONYMOUS_CODING	MODERATE	MISSENSE	Ctc/Ttc	L1847F	c.5539C>T	Pole	ENSMUST00000007296	40	0.3548
B16F10 ATCC	chr5	77342722	.	T	G	NON_SYNONYMOUS_CODING	MODERATE	MISSENSE	aTc/aGc	I903S	c.2708T>G	Polr2b	ENSMUST00000031167	19	0.2776
B16F10 ATCC	chr5	77345401	.	G	A	NON_SYNONYMOUS_CODING	MODERATE	MISSENSE	Ggc/Agc	G1077S	c.3229G>A	Polr2b	ENSMUST00000031167	23	0.2735
B16F10 ATCC	chr14	24479724	.	A	C	NON_SYNONYMOUS_CODING	MODERATE	MISSENSE	gTc/gGc	V266G	c.797T>G	Polr3a	ENSMUST00000026322	6	0.3117
B16F10 ATCC	chr15	34499319	.	C	G	NON_SYNONYMOUS_CODING	MODERATE	MISSENSE	gCt/gGt	A10G	c.29C>G	Pop1	ENSMUST00000052290	2	0.3227
B16F10 ATCC	chr5	137502011	.	T	C	NON_SYNONYMOUS_CODING	MODERATE	MISSENSE	tAc/tGc	Y20C	c.59A>G	Pop7	ENSMUST00000031728	2	0.4921
B16F10 ATCC	chr3	54375127	.	A	T	NON_SYNONYMOUS_CODING	MODERATE	MISSENSE	gAc/gTc	D503V	c.1508A>T	Postn	ENSMUST00000081564	11	0.2761
B16F10 ATCC	chr8	78435601	.	C	G	NON_SYNONYMOUS_CODING	MODERATE	MISSENSE	caG/caC	Q124H	c.372G>C	Pou4f2	ENSMUST00000034115	2	0.2143
B16F10 ATCC	chr16	5089507	.	G	A	NON_SYNONYMOUS_CODING	MODERATE	MISSENSE	Cgg/Tgg	R975W	c.2923C>T	Ppl	ENSMUST00000035672	22	0.4805
B16F10 ATCC	chr5	122172753	.	C	T	NON_SYNONYMOUS_CODING	MODERATE	MISSENSE	tCt/tTt	S182F	c.545C>T	Ppp1cc	ENSMUST00000086294	5	0.2267
B16F10 ATCC	chr17	35930767	.	ACATGATGTCCCTAGC	A	CODON_DELETION	MODERATE		gatgtccctagccat/	D813_H817del	c.2437_2451delGATGTCCCTAGCCAT	Ppp1r10	ENSMUST00000087210	18	0.2697
B16F10 ATCC	chr1	93352588	.	T	C	NON_SYNONYMOUS_CODING	MODERATE	MISSENSE	cTc/cCc	L170P	c.509T>C	Ppp1r7	ENSMUST00000027494	6	0.2066
B16F10 ATCC	chr9	50866911	.	A	C	NON_SYNONYMOUS_CODING	MODERATE	MISSENSE	gaA/gaC	E309D	c.927A>C	Ppp2r1b	ENSMUST00000174628	7	0.2923
B16F10 ATCC	chr12	110570744	.	A	C	NON_SYNONYMOUS_CODING	MODERATE	MISSENSE	gaA/gaC	E434D	c.1302A>C	Ppp2r5c	ENSMUST00000084985	12	0.1220
B16F10 ATCC	chr11	17182099	.	T	C	SPLICE_SITE_REGION+INTRON	LOW				c.4-8T>C	Ppp3r1	ENSMUST00000102880	1	0.1812
B16F10 ATCC	chr12	103601493	.	G	GA	FRAME_SHIFT	HIGH		aac/aaAc	N691fs	c.2072dupA	Ppp4r4	ENSMUST00000021631	19	0.3818
B16F10 ATCC	chr4	144273086	.	TC	T	FRAME_SHIFT	HIGH		ggg/	G143fs	c.429delG	Pramel5	ENSMUST00000035757	3	0.2809
B16F10 ATCC	chr10	44441925	.	G	A	NON_SYNONYMOUS_CODING	MODERATE	MISSENSE	Cgg/Tgg	R334W	c.1000C>T	Prdm1	ENSMUST00000039174	6	0.3617
B16F10 ATCC	chr2	84982265	.	G	T	NON_SYNONYMOUS_CODING	MODERATE	MISSENSE	aaG/aaT	K106N	c.318G>T	Prg2	ENSMUST00000028467	3	0.2901
B16F10 ATCC	chr5	98973211	.	GA	G	SPLICE_SITE_REGION+INTRON	LOW				c.1155-6delT	Prkg2	ENSMUST00000161490	9	0.3412
B16F10 ATCC	chr5	99024493	.	GC	G	FRAME_SHIFT	HIGH		gcg/	A121fs	c.361delG	Prkg2	ENSMUST00000161490	2	0.3231
B16F10 ATCC	chr5	99024804	.	A	T	NON_SYNONYMOUS_CODING	MODERATE	MISSENSE	caT/caA	H17Q	c.51T>A	Prkg2	ENSMUST00000161490	2	0.2941
B16F10 ATCC	chr18	35652769	.	G	C	NON_SYNONYMOUS_CODING	MODERATE	MISSENSE	Ccg/Gcg	P811A	c.2431C>G	Prob1	ENSMUST00000190196	1	0.5455
B16F10 ATCC	chr1	190161999	.	G	C	NON_SYNONYMOUS_CODING	MODERATE	MISSENSE	gCc/gGc	A83G	c.248C>G	Prox1	ENSMUST00000010319	2	0.2478
B16F10 ATCC	chr9	98843347	.	G	A	NON_SYNONYMOUS_CODING	MODERATE	MISSENSE	cGa/cAa	R254Q	c.761G>A	Prr23a	ENSMUST00000170349	1	0.2381
B16F10 ATCC	chr5	87842646	.	G	A	NON_SYNONYMOUS_CODING	MODERATE	MISSENSE	cGc/cAc	R39H	c.116G>A	Prr27	ENSMUST00000101056	5	0.3041
B16F10 ATCC	chr14	101198140	.	G	C	NON_SYNONYMOUS_CODING	MODERATE	MISSENSE	Cag/Gag	Q329E	c.985C>G	Prr30	ENSMUST00000057718	3	0.2258
B16F10 ATCC	chr17	35152792	.	GA	G	SPLICE_SITE_REGION+INTRON	LOW				c.5371-8delT	Prrc2a	ENSMUST00000025253	23	0.1591
B16F10 ATCC	chr2	32214429	.	C	A	NON_SYNONYMOUS_CODING	MODERATE	MISSENSE	aaC/aaA	N1306K	c.3918C>A	Prrc2b	ENSMUST00000069817	16	0.1864
B16F10 ATCC	chr2	32216732	.	G	A	NON_SYNONYMOUS_CODING	MODERATE	MISSENSE	aGa/aAa	R1582K	c.4745G>A	Prrc2b	ENSMUST00000069817	18	0.4909
B16F10 ATCC	chr1	163261877	.	A	C	NON_SYNONYMOUS_CODING	MODERATE	MISSENSE	cTc/cGc	L127R	c.380T>G	Prrx1	ENSMUST00000027878	2	0.2029
B16F10 ATCC	chr6	41463617	.	G	T	STOP_GAINED	HIGH	NONSENSE	Gag/Tag	E209*	c.625G>T	Prss1	ENSMUST00000031910	5	0.1172
B16F10 ATCC	chr17	23997916	.	G	A	SPLICE_SITE_REGION+INTRON	LOW				c.82+7C>T	Prss22	ENSMUST00000041649	1	0.2449
B16F10 ATCC	chr7	127934537	.	G	A	STOP_GAINED	HIGH	NONSENSE	Cga/Tga	R544*	c.1630C>T	Prss36	ENSMUST00000094026	11	0.2342
B16F10 ATCC	chr7	127887398	.	C	T	STOP_GAINED	HIGH	NONSENSE	tGg/tAg	W352*	c.1055G>A	Prss53	ENSMUST00000121394	8	0.1493
B16F10 ATCC	chr9	72893833	.	G	GC	FRAME_SHIFT	HIGH		ccg/ccCg	V818fs	c.2450dupC	Prtg	ENSMUST00000055535	15	0.1605
B16F10 ATCC	chr7	18816910	.	G	A	NON_SYNONYMOUS_CODING	MODERATE	MISSENSE	aCa/aTa	T340I	c.1019C>T	Psg17	ENSMUST00000004655	4	0.2371
B16F10 ATCC	chr7	18529591	.	T	A	NON_SYNONYMOUS_CODING	MODERATE	MISSENSE	agA/agT	R102S	c.306A>T	Psg25	ENSMUST00000094795	2	0.2460
B16F10 ATCC	chr7	18427798	.	T	G	SPLICE_SITE_REGION+INTRON	LOW				c.775+4A>C	Psg28	ENSMUST00000019291	3	0.2445
B16F10 ATCC	chr12	70974731	.	C	T	START_GAINED	LOW				c.-16C>T	Psma3	ENSMUST00000160027	1	0.2927
B16F10 ATCC	chr11	80471550	.	A	ATC	FRAME_SHIFT	HIGH		aaa/aTCaa	K409fs	c.1225_1226insTC	Psmd11	ENSMUST00000017572	13	0.2099
B16F10 ATCC	chr4	148271743	.	G	C	NON_SYNONYMOUS_CODING	MODERATE	MISSENSE	gCc/gGc	A220G	c.659C>G	Ptchd2	ENSMUST00000047720	2	0.3594
B16F10 ATCC	chr17	46763595	.	G	C	NON_SYNONYMOUS_CODING	MODERATE	MISSENSE	gCc/gGc	A7G	c.20C>G	Ptcra	ENSMUST00000041012	1	0.5600
B16F10 ATCC	chr19	32776051	.	C	T	NON_SYNONYMOUS_CODING	MODERATE	MISSENSE	gCa/gTa	A39V	c.116C>T	Pten	ENSMUST00000013807	2	0.2371
B16F10 ATCC	chr19	32799998	.	A	C	NON_SYNONYMOUS_CODING	MODERATE	MISSENSE	Act/Cct	T131P	c.391A>C	Pten	ENSMUST00000013807	5	0.9714
B16F10 ATCC	chr3	101056437	.	T	G	NON_SYNONYMOUS_CODING	MODERATE	MISSENSE	Acc/Ccc	T620P	c.1858A>C	Ptgfrn	ENSMUST00000102694	6	0.6623
B16F10 ATCC	chr1	75260620	.	T	A	NON_SYNONYMOUS_CODING	MODERATE	MISSENSE	Atg/Ttg	M113L	c.337A>T	Ptprn	ENSMUST00000027404	4	0.3585
B16F10 ATCC	chr10	107699672	.	C	T	NON_SYNONYMOUS_CODING	MODERATE	MISSENSE	Gcc/Acc	A411T	c.1231G>A	Ptprq	ENSMUST00000050702	9	0.3253
B16F10 ATCC	chr2	162238121	.	A	G	NON_SYNONYMOUS_CODING	MODERATE	MISSENSE	Tca/Cca	S253P	c.757T>C	Ptprt	ENSMUST00000109441	6	0.1589
B16F10 ATCC	chr6	23000785	.	T	G	NON_SYNONYMOUS_CODING	MODERATE	MISSENSE	cTg/cGg	L958R	c.2873T>G	Ptprz1	ENSMUST00000090568	12	0.1468
B16F10 ATCC	chr6	23024726	.	T	G	NON_SYNONYMOUS_CODING	MODERATE	MISSENSE	Ttt/Gtt	F1724V	c.5170T>G	Ptprz1	ENSMUST00000090568	16	0.1393
B16F10 ATCC	chr6	23045746	.	A	C	NON_SYNONYMOUS_CODING	MODERATE	MISSENSE	Aca/Cca	T2172P	c.6514A>C	Ptprz1	ENSMUST00000090568	27	0.1189
B16F10 ATCC	chr11	100958658	.	T	C	NON_SYNONYMOUS_CODING	MODERATE	MISSENSE	gAc/gGc	D382G	c.1145A>G	Ptrf	ENSMUST00000060792	2	0.3043
B16F10 ATCC	chr14	8098352	.	T	C	NON_SYNONYMOUS_CODING	MODERATE	MISSENSE	cTg/cCg	L13P	c.38T>C	Pxk	ENSMUST00000036682	1	0.4000
B16F10 ATCC	chr1	173677774	.	A	C	NON_SYNONYMOUS_CODING	MODERATE	MISSENSE	aAg/aCg	K30T	c.89A>C	Pydc3	ENSMUST00000085876	2	0.2167
B16F10 ATCC	chr1	173637407	.	A	C	NON_SYNONYMOUS_CODING	MODERATE	MISSENSE	aaA/aaC	K34N	c.102A>C	Pyhin1	ENSMUST00000056071	2	0.1946
B16F10 ATCC	chr1	173641146	.	A	G	NON_SYNONYMOUS_CODING	MODERATE	MISSENSE	Aaa/Gaa	K181E	c.541A>G	Pyhin1	ENSMUST00000056071	4	0.2852
B16F10 ATCC	chr1	127891065	.	T	A	NON_SYNONYMOUS_CODING	MODERATE	MISSENSE	Ttt/Att	F111I	c.331T>A	Rab3gap1	ENSMUST00000037649	5	0.2020
B16F10 ATCC	chr1	127930770	.	G	T	NON_SYNONYMOUS_CODING	MODERATE	MISSENSE	Gat/Tat	D539Y	c.1615G>T	Rab3gap1	ENSMUST00000037649	17	0.2172
B16F10 ATCC	chr1	185281677	.	A	T	NON_SYNONYMOUS_CODING	MODERATE	MISSENSE	ttA/ttT	L1193F	c.3579A>T	Rab3gap2	ENSMUST00000069652	32	0.2511
B16F10 ATCC	chr1	160733586	.	A	C	NON_SYNONYMOUS_CODING	MODERATE	MISSENSE	agT/agG	S220R	c.660T>G	Rabgap1l	ENSMUST00000028049	5	0.2083
B16F10 ATCC	chr15	89583652	.	C	G	NON_SYNONYMOUS_CODING	MODERATE	MISSENSE	Gct/Cct	A180P	c.538G>C	Rabl2	ENSMUST00000023294	8	0.1727
B16F10 ATCC	chr5	143514719	.	C	A	NON_SYNONYMOUS_CODING	MODERATE	MISSENSE	Gct/Tct	A59S	c.175G>T	Rac1	ENSMUST00000100489	3	0.2971
B16F10 ATCC	chr15	51982626	.	T	G	NON_SYNONYMOUS_CODING	MODERATE	MISSENSE	aAa/aCa	K16T	c.47A>C	Rad21	ENSMUST00000022927	2	0.3016
B16F10 ATCC	chr2	151668019	.	C	T	NON_SYNONYMOUS_CODING	MODERATE	MISSENSE	cGa/cAa	R54Q	c.161G>A	Rad21l	ENSMUST00000180195	2	0.3112
B16F10 ATCC	chr19	4201479	.	T	G	SPLICE_SITE_REGION+INTRON	LOW				c.34+4A>C	Rad9a	ENSMUST00000025740	1	0.2315
B16F10 ATCC	chr5	122333372	.	A	G	NON_SYNONYMOUS_CODING	MODERATE	MISSENSE	Ttt/Ctt	F266L	c.796T>C	Rad9b	ENSMUST00000117263	9	0.4269
B16F10 ATCC	chr10	22181951	.	A	C	NON_SYNONYMOUS_CODING	MODERATE	MISSENSE	Acc/Ccc	T206P	c.616A>C	Raet1e	ENSMUST00000065527	6	0.2577
B16F10 ATCC	chr2	146434905	.	T	G	NON_SYNONYMOUS_CODING	MODERATE	MISSENSE	Agt/Cgt	S472R	c.1414A>C	Ralgapa2	ENSMUST00000109986	12	0.2872
B16F10 ATCC	chr10	58477972	.	A	AGTTTGTGCTCG	FRAME_SHIFT	HIGH		gtg/gtTTGTGCTCGGTg	K1510fs	c.4516_4526dupTTGTGCTCGGT	Ranbp2	ENSMUST00000003310	20	0.4327
B16F10 ATCC	chr10	58492893	.	A	T	NON_SYNONYMOUS_CODING	MODERATE	MISSENSE	caA/caT	Q2871H	c.8613A>T	Ranbp2	ENSMUST00000003310	28	0.5517
B16F10 ATCC	chr5	90617788	.	TA	T	SPLICE_SITE_REGION+INTRON	LOW				c.66-4delT	Rassf6	ENSMUST00000031317	2	0.8889
B16F10 ATCC	chr7	141217145	.	C	G	NON_SYNONYMOUS_CODING	MODERATE	MISSENSE	agC/agG	S90R	c.270C>G	Rassf7	ENSMUST00000046890	3	0.3286
B16F10 ATCC	chr6	145815482	.	A	G	NON_SYNONYMOUS_CODING	MODERATE	MISSENSE	cAg/cGg	Q178R	c.533A>G	Rassf8	ENSMUST00000032388	2	0.2783
B16F10 ATCC	chr6	145816616	.	A	C	NON_SYNONYMOUS_CODING	MODERATE	MISSENSE	gAg/gCg	E371A	c.1112A>C	Rassf8	ENSMUST00000032388	3	0.2342
B16F10 ATCC	chr1	6249018	.	A	AT	FRAME_SHIFT	HIGH		gta/Tgta	V888fs	c.2661dupT	Rb1cc1	ENSMUST00000027040	15	0.5000
B16F10 ATCC	chr7	123000162	.	C	A	NON_SYNONYMOUS_CODING	MODERATE	MISSENSE	cCc/cAc	P1232H	c.3695C>A	Rbbp6	ENSMUST00000052135	17	0.1941
B16F10 ATCC	chr4	12146079	.	G	T	NON_SYNONYMOUS_CODING	MODERATE	MISSENSE	Gtg/Ttg	V684L	c.2050G>T	Rbm12b1	ENSMUST00000050069	4	0.2469
B16F10 ATCC	chr1	165656011	.	C	A	NON_SYNONYMOUS_CODING	MODERATE	MISSENSE	aGa/aTa	R167I	c.500G>T	Rcsd1	ENSMUST00000040357	6	0.1321
B16F10 ATCC	chr10	127788833	.	A	C	NON_SYNONYMOUS_CODING	MODERATE	MISSENSE	aAg/aCg	K180T	c.539A>C	Rdh9	ENSMUST00000052652	2	0.3005
B16F10 ATCC	chr14	55625147	.	A	T	NON_SYNONYMOUS_CODING	MODERATE	MISSENSE	aAg/aTg	K553M	c.1658A>T	Rec8	ENSMUST00000002395	19	0.3333
B16F10 ATCC	chr6	71761444	.	A	G	SPLICE_SITE_REGION+INTRON	LOW				c.182+3A>G	Reep1	ENSMUST00000121469	3	0.1643
B16F10 ATCC	chr6	78426918	.	G	T	STOP_GAINED	HIGH	NONSENSE	Gaa/Taa	E23*	c.67G>T	Reg1	ENSMUST00000079926	3	0.2647
B16F10 ATCC	chr6	78371267	.	A	C	NON_SYNONYMOUS_CODING	MODERATE	MISSENSE	ttA/ttC	L21F	c.63A>C	Reg3b	ENSMUST00000096904	2	0.1214
B16F10 ATCC	chr1	75278291	.	T	C	NON_SYNONYMOUS_CODING	MODERATE	MISSENSE	aAg/aGg	K6R	c.17A>G	Resp18	ENSMUST00000039534	1	0.4630
B16F10 ATCC	chr1	38059115	.	A	C	SPLICE_SITE_REGION+INTRON	LOW				c.2339+7T>G	Rev1	ENSMUST00000027251	14	0.4560
B16F10 ATCC	chr10	39824318	.	C	A	NON_SYNONYMOUS_CODING	MODERATE	MISSENSE	Cag/Aag	Q1604K	c.4810C>A	Rev3l	ENSMUST00000019986	13	0.2889
B16F10 ATCC	chr5	134594281	.	G	A	SPLICE_SITE_REGION+INTRON	LOW				c.744+7G>A	Rfc2	ENSMUST00000023867	8	0.2847
B16F10 ATCC	chr5	151644862	.	C	T	NON_SYNONYMOUS_CODING	MODERATE	MISSENSE	cGt/cAt	R213H	c.638G>A	Rfc3	ENSMUST00000038131	6	0.1864
B16F10 ATCC	chr8	111297606	.	C	A	NON_SYNONYMOUS_CODING	MODERATE	MISSENSE	gGa/gTa	G28V	c.83G>T	Rfwd3	ENSMUST00000038739	2	0.3115
B16F10 ATCC	chr19	27837450	.	G	A	NON_SYNONYMOUS_CODING	MODERATE	MISSENSE	tCt/tTt	S169F	c.506C>T	Rfx3	ENSMUST00000165566	6	0.4859
B16F10 ATCC	chr1	39682966	.	T	G	NON_SYNONYMOUS_CODING+SPLICE_SITE_REGION	MODERATE	MISSENSE	gaA/gaC	E286D	c.858A>C	Rfx8	ENSMUST00000151913	10	0.3551
B16F10 ATCC	chr1	152675020	.	G	A	START_GAINED	LOW				c.-29C>T	Rgl1	ENSMUST00000111859	2	0.2658
B16F10 ATCC	chr17	26205772	.	G	C	NON_SYNONYMOUS_CODING	MODERATE	MISSENSE	caG/caC	Q220H	c.660G>C	Rgs11	ENSMUST00000025020	9	0.1705
B16F10 ATCC	chr1	175084020	.	T	C	NON_SYNONYMOUS_CODING	MODERATE	MISSENSE	gAg/gGg	E345G	c.1034A>G	Rgs7	ENSMUST00000195324	14	0.2304
B16F10 ATCC	chr7	109056767	.	G	C	NON_SYNONYMOUS_CODING	MODERATE	MISSENSE	cCt/cGt	P134R	c.401C>G	Ric3	ENSMUST00000055993	3	0.2000
B16F10 ATCC	chr15	6765051	.	G	C	SPLICE_SITE_ACCEPTOR+INTRON	HIGH				c.822-1G>C	Rictor	ENSMUST00000061656	9	0.2493
B16F10 ATCC	chr16	17211360	.	T	G	NON_SYNONYMOUS_CODING	MODERATE	MISSENSE	Tta/Gta	L883V	c.2647T>G	Rimbp3	ENSMUST00000169803	1	0.2286
B16F10 ATCC	chr1	22288586	.	C	G	NON_SYNONYMOUS_CODING	MODERATE	MISSENSE	Gct/Cct	A1371P	c.4111G>C	Rims1	ENSMUST00000097811	37	0.1491
B16F10 ATCC	chr5	23805314	.	A	G	NON_SYNONYMOUS_CODING	MODERATE	MISSENSE	Aac/Gac	N174D	c.520A>G	Rint1	ENSMUST00000030852	5	0.3226
B16F10 ATCC	chr14	55787926	.	T	G	NON_SYNONYMOUS_CODING	MODERATE	MISSENSE	gaA/gaC	E124D	c.372A>C	Ripk3	ENSMUST00000022830	3	0.3333
B16F10 ATCC	chr1	153754205	.	C	T	STOP_GAINED	HIGH	NONSENSE	Cag/Tag	Q156*	c.466C>T	Rnasel	ENSMUST00000086209	4	0.1761
B16F10 ATCC	chr10	29347572	.	G	A	NON_SYNONYMOUS_CODING	MODERATE	MISSENSE	gCg/gTg	A106V	c.317C>T	Rnf146	ENSMUST00000037548	4	0.2634
B16F10 ATCC	chr11	119477254	.	A	G	NON_SYNONYMOUS_CODING	MODERATE	MISSENSE	aAg/aGg	K4706R	c.14117A>G	Rnf213	ENSMUST00000093902	58	0.3504
B16F10 ATCC	chr11	87731517	.	C	G	NON_SYNONYMOUS_CODING	MODERATE	MISSENSE	aaC/aaG	N481K	c.1443C>G	Rnf43	ENSMUST00000092800	8	0.1515
B16F10 ATCC	chr18	68307674	.	C	T	NON_SYNONYMOUS_CODING	MODERATE	MISSENSE	tCa/tTa	S136L	c.407C>T	Rnmt	ENSMUST00000009679	3	0.3176
B16F10 ATCC	chr14	64028758	.	C	T	NON_SYNONYMOUS_CODING	MODERATE	MISSENSE	Cac/Tac	H598Y	c.1792C>T	Rp1l1	ENSMUST00000058229	4	0.2632
B16F10 ATCC	chr14	64030378	.	T	G	NON_SYNONYMOUS_CODING	MODERATE	MISSENSE	Ttc/Gtc	F1138V	c.3412T>G	Rp1l1	ENSMUST00000058229	4	0.3448
B16F10 ATCC	chr8	91220179	.	A	T	STOP_LOST	HIGH	MISSENSE	Tga/Aga	*1265Rext*?	c.3793T>A	Rpgrip1l	ENSMUST00000047783	26	0.3022
B16F10 ATCC	chr8	91260975	.	T	G	NON_SYNONYMOUS_CODING	MODERATE	MISSENSE	aAg/aCg	K818T	c.2453A>C	Rpgrip1l	ENSMUST00000047783	17	0.1709
B16F10 ATCC	chr8	91270120	.	A	T	NON_SYNONYMOUS_CODING	MODERATE	MISSENSE	Ttt/Att	F711I	c.2131T>A	Rpgrip1l	ENSMUST00000047783	15	0.4419
B16F10 ATCC	chr2	32963019	.	T	A	NON_SYNONYMOUS_CODING	MODERATE	MISSENSE	aTc/aAc	I82N	c.245T>A	Rpl12	ENSMUST00000126610	4	0.2155
B16F10 ATCC	chr7	45127513	.	G	C	NON_SYNONYMOUS_CODING	MODERATE	MISSENSE	gCc/gGc	A244G	c.731C>G	Rpl13a	ENSMUST00000124300	7	0.4897
B16F10 ATCC	chr3	93397427	.	C	A	NON_SYNONYMOUS_CODING	MODERATE	MISSENSE	cCt/cAt	P689H	c.2066C>A	Rptn	ENSMUST00000045912	3	0.2042
B16F10 ATCC	chr17	25728650	.	A	C	SPLICE_SITE_REGION+INTRON	LOW				c.306+4A>C	Rpusd1	ENSMUST00000047273	3	0.2424
B16F10 ATCC	chr2	143974486	.	C	A	NON_SYNONYMOUS_CODING	MODERATE	MISSENSE	gGa/gTa	G741V	c.2222G>T	Rrbp1	ENSMUST00000016072	3	0.3542
B16F10 ATCC	chr13	37948937	.	G	A	NON_SYNONYMOUS_CODING	MODERATE	MISSENSE	aGa/aAa	R1696K	c.5087G>A	Rreb1	ENSMUST00000037232	12	0.2917
B16F10 ATCC	chr17	32049483	.	G	T	STOP_GAINED	HIGH	NONSENSE	Gaa/Taa	E139*	c.415G>T	Rrp1b	ENSMUST00000081339	5	0.1493
B16F10 ATCC	chr16	11202385	.	C	T	NON_SYNONYMOUS_CODING	MODERATE	MISSENSE	Ggg/Agg	G60R	c.178G>A	Rsl1d1	ENSMUST00000119953	2	0.1653
B16F10 ATCC	chr2	119675221	.	G	C	NON_SYNONYMOUS_CODING	MODERATE	MISSENSE	Ggc/Cgc	G52R	c.154G>C	Rtf1	ENSMUST00000028767	1	0.2879
B16F10 ATCC	chr4	13865892	.	G	A	NON_SYNONYMOUS_CODING	MODERATE	MISSENSE	cGa/cAa	R380Q	c.1139G>A	Runx1t1	ENSMUST00000098257	8	0.2411
B16F10 ATCC	chr16	87436775	.	C	T	NON_SYNONYMOUS_CODING	MODERATE	MISSENSE	Gcc/Acc	A146T	c.436G>A	Rwdd2b	ENSMUST00000039101	4	0.2455
B16F10 ATCC	chr3	79705704	.	C	T	NON_SYNONYMOUS_CODING	MODERATE	MISSENSE	Gga/Aga	G20R	c.58G>A	Rxfp1	ENSMUST00000078527	2	0.2329
B16F10 ATCC	chr13	11649724	.	T	G	SPLICE_SITE_REGION+INTRON	LOW				c.10686+6A>C	Ryr2	ENSMUST00000021750	74	0.7000
B16F10 ATCC	chr2	112772676	.	T	G	SPLICE_SITE_REGION+INTRON	LOW				c.7478+4A>C	Ryr3	ENSMUST00000091818	48	0.2500
B16F10 ATCC	chr2	112900916	.	C	A	NON_SYNONYMOUS_CODING	MODERATE	MISSENSE	gGc/gTc	G703V	c.2108G>T	Ryr3	ENSMUST00000091818	18	0.1860
B16F10 ATCC	chr3	90515942	.	C	G	NON_SYNONYMOUS_CODING	MODERATE	MISSENSE	tCt/tGt	S80C	c.239C>G	S100a13	ENSMUST00000048138	3	0.3932
B16F10 ATCC	chr17	51782939	.	C	G	NON_SYNONYMOUS_CODING	MODERATE	MISSENSE	caG/caC	Q293H	c.879G>C	Satb1	ENSMUST00000140979	7	0.2679
B16F10 ATCC	chr17	51782952	.	G	A	NON_SYNONYMOUS_CODING	MODERATE	MISSENSE	tCt/tTt	S289F	c.866C>T	Satb1	ENSMUST00000140979	7	0.2340
B16F10 ATCC	chr5	124393958	.	T	G	NON_SYNONYMOUS_CODING	MODERATE	MISSENSE	aaA/aaC	K720N	c.2160A>C	Sbno1	ENSMUST00000065263	17	0.4432
B16F10 ATCC	chr5	124404304	.	G	T	NON_SYNONYMOUS_CODING	MODERATE	MISSENSE	Cct/Act	P309T	c.925C>A	Sbno1	ENSMUST00000065263	8	0.2645
B16F10 ATCC	chr17	23953544	.	A	C	NON_SYNONYMOUS_CODING	MODERATE	MISSENSE	Ttc/Gtc	F134V	c.400T>G	Sbpl	ENSMUST00000024939	3	0.2396
B16F10 ATCC	chr7	30751751	.	G	T	STOP_GAINED	HIGH	NONSENSE	Gaa/Taa	E64*	c.190G>T	Sbsn	ENSMUST00000080518	1	0.2038
B16F10 ATCC	chr17	3162983	.	T	G	NON_SYNONYMOUS_CODING	MODERATE	MISSENSE	Tta/Gta	L116V	c.346T>G	Scaf8	ENSMUST00000076734	5	0.2206
B16F10 ATCC	chr9	110372336	.	A	G	NON_SYNONYMOUS_CODING	MODERATE	MISSENSE	aAc/aGc	N131S	c.392A>G	Scap	ENSMUST00000098350	4	0.7692
B16F10 ATCC	chr11	75525490	.	C	T	NON_SYNONYMOUS_CODING	MODERATE	MISSENSE	gCc/gTc	A586V	c.1757C>T	Scarf1	ENSMUST00000042808	11	0.2414
B16F10 ATCC	chr19	44397923	.	C	A	NON_SYNONYMOUS_CODING	MODERATE	MISSENSE	aGc/aTc	S355I	c.1064G>T	Scd1	ENSMUST00000041331	6	0.2581
B16F10 ATCC	chr7	33944367	.	A	C	NON_SYNONYMOUS_CODING	MODERATE	MISSENSE	ttT/ttG	F49L	c.147T>G	Scgb2b26	ENSMUST00000085623	2	0.2893
B16F10 ATCC	chr12	40079641	.	C	T	NON_SYNONYMOUS_CODING	MODERATE	MISSENSE	atG/atA	M384I	c.1152G>A	Scin	ENSMUST00000002640	8	0.2705
B16F10 ATCC	chr9	119755242	.	A	G	NON_SYNONYMOUS_CODING	MODERATE	MISSENSE	Ttc/Ctc	F1436L	c.4306T>C	Scn11a	ENSMUST00000070617	27	0.2573
B16F10 ATCC	chr7	31123108	.	T	G	NON_SYNONYMOUS_CODING	MODERATE	MISSENSE	gaA/gaC	E82D	c.246A>C	Scn1b	ENSMUST00000098548	3	0.3009
B16F10 ATCC	chr2	65764222	.	A	C	NON_SYNONYMOUS_CODING	MODERATE	MISSENSE	aAg/aCg	K1805T	c.5414A>C	Scn2a1	ENSMUST00000028377	27	0.2274
B16F10 ATCC	chr2	66676565	.	C	A	SPLICE_SITE_REGION+INTRON	LOW				c.3983-4G>T	Scn7a	ENSMUST00000042792	24	0.2167
B16F10 ATCC	chr2	66713951	.	C	T	NON_SYNONYMOUS_CODING	MODERATE	MISSENSE	Gaa/Aaa	E399K	c.1195G>A	Scn7a	ENSMUST00000042792	10	0.2544
B16F10 ATCC	chr15	76048231	.	G	A	NON_SYNONYMOUS_CODING	MODERATE	MISSENSE	Cca/Tca	P1560S	c.4678C>T	Scrib	ENSMUST00000002603	34	0.2193
B16F10 ATCC	chr1	120036406	.	GT	G	FRAME_SHIFT	HIGH		gtc/	V139fs	c.416delT	Sctr	ENSMUST00000072886	5	0.3557
B16F10 ATCC	chr11	78245915	.	C	G	START_GAINED	LOW				c.-81C>G	Sdf2	ENSMUST00000002133	1	0.3846
B16F10 ATCC	chr2	26439093	.	G	A	NON_SYNONYMOUS_CODING	MODERATE	MISSENSE	tCc/tTc	S970F	c.2909C>T	Sec16a	ENSMUST00000114082	2	0.2617
B16F10 ATCC	chr12	59004576	.	A	G	NON_SYNONYMOUS_CODING+SPLICE_SITE_REGION	MODERATE	MISSENSE	Ttt/Ctt	F94L	c.280T>C	Sec23a	ENSMUST00000021375	4	0.3492
B16F10 ATCC	chr5	53116196	.	C	A	NON_SYNONYMOUS_CODING	MODERATE	MISSENSE	Gcc/Tcc	A1081S	c.3241G>T	Sel1l3	ENSMUST00000031090	23	0.2014
B16F10 ATCC	chr14	29973444	.	G	A	NON_SYNONYMOUS_CODING	MODERATE	MISSENSE	gGa/gAa	G93E	c.278G>A	Selk	ENSMUST00000112268	4	0.3382
B16F10 ATCC	chr9	107599034	.	A	C	NON_SYNONYMOUS_CODING	MODERATE	MISSENSE	Ttg/Gtg	L663V	c.1987T>G	Sema3b	ENSMUST00000073448	19	0.4667
B16F10 ATCC	chr5	14226456	.	G	A	NON_SYNONYMOUS_CODING	MODERATE	MISSENSE	aGc/aAc	S285N	c.854G>A	Sema3e	ENSMUST00000073957	8	0.2211
B16F10 ATCC	chr17	6048918	.	G	A	NON_SYNONYMOUS_CODING	MODERATE	MISSENSE	Cct/Tct	P533S	c.1597C>T	Serac1	ENSMUST00000097432	15	0.2245
B16F10 ATCC	chr12	103854667	.	C	A	SPLICE_SITE_DONOR+INTRON	HIGH				c.1119+1G>T	Serpina1a	ENSMUST00000072876	5	0.4155
B16F10 ATCC	chr12	103854670	.	G	T	NON_SYNONYMOUS_CODING+SPLICE_SITE_REGION	MODERATE	MISSENSE	Cag/Aag	Q373K	c.1117C>A	Serpina1a	ENSMUST00000072876	5	0.1991
B16F10 ATCC	chr1	107524738	.	C	CT	FRAME_SHIFT	HIGH		ctt/Tctt	L351fs	c.1050dupT	Serpinb2	ENSMUST00000009356	8	0.2212
B16F10 ATCC	chr1	107157751	.	T	G	NON_SYNONYMOUS_CODING	MODERATE	MISSENSE	Act/Cct	T87P	c.259A>C	Serpinb3b	ENSMUST00000086694	4	0.2366
B16F10 ATCC	chr13	33893872	.	A	G	NON_SYNONYMOUS_CODING	MODERATE	MISSENSE	Ttc/Ctc	F172L	c.514T>C	Serpinb6c	ENSMUST00000172184	5	0.3359
B16F10 ATCC	chr13	33893923	.	G	A	NON_SYNONYMOUS_CODING	MODERATE	MISSENSE	Cca/Tca	P155S	c.463C>T	Serpinb6c	ENSMUST00000172184	5	0.3047
B16F10 ATCC	chr13	33671254	.	T	C	NON_SYNONYMOUS_CODING	MODERATE	MISSENSE	Ttt/Ctt	F304L	c.910T>C	Serpinb6d	ENSMUST00000059637	7	0.6789
B16F10 ATCC	chr13	33486658	.	T	C	NON_SYNONYMOUS_CODING	MODERATE	MISSENSE	cTc/cCc	L43P	c.128T>C	Serpinb9g	ENSMUST00000081927	2	0.3993
B16F10 ATCC	chr1	161000015	.	C	T	NON_SYNONYMOUS_CODING	MODERATE	MISSENSE	Ctc/Ttc	L395F	c.1183C>T	Serpinc1	ENSMUST00000064725	7	0.2500
B16F10 ATCC	chr1	192847031	.	G	T	NON_SYNONYMOUS_CODING	MODERATE	MISSENSE	aCc/aAc	T159N	c.476C>A	Sertad4	ENSMUST00000016406	4	0.2569
B16F10 ATCC	chr18	78859594	.	G	C	NON_SYNONYMOUS_CODING	MODERATE	MISSENSE	cCc/cGc	P239R	c.716C>G	Setbp1	ENSMUST00000025430	4	0.3889
B16F10 ATCC	chr18	78859594	.	G	C	NON_SYNONYMOUS_CODING	MODERATE	MISSENSE	cCc/cGc	P286R	c.857C>G	Setbp1	ENSMUST00000161465	3	0.3889
B16F10 ATCC	chr11	77973197	.	T	G	NON_SYNONYMOUS_CODING	MODERATE	MISSENSE	Ttc/Gtc	F502V	c.1504T>G	Sez6	ENSMUST00000093995	7	0.3860
B16F10 ATCC	chr5	112440915	.	T	G	NON_SYNONYMOUS_CODING	MODERATE	MISSENSE	cAg/cCg	Q644P	c.1931A>C	Sez6l	ENSMUST00000079491	10	0.2941
B16F10 ATCC	chr2	10579183	.	A	C	NON_SYNONYMOUS_CODING	MODERATE	MISSENSE	Act/Cct	T817P	c.2449A>C	Sfmbt2	ENSMUST00000041105	21	0.3814
B16F10 ATCC	chr13	104131939	.	T	C	NON_SYNONYMOUS_CODING+SPLICE_SITE_REGION	MODERATE	MISSENSE	cTc/cCc	L161P	c.482T>C	Sgtb	ENSMUST00000044385	7	0.3820
B16F10 ATCC	chr5	121818359	.	C	T	NON_SYNONYMOUS_CODING	MODERATE	MISSENSE	gGa/gAa	G394E	c.1181G>A	Sh2b3	ENSMUST00000040308	7	0.1446
B16F10 ATCC	chr7	44352166	.	C	T	NON_SYNONYMOUS_CODING	MODERATE	MISSENSE	gCt/gTt	A1103V	c.3308C>T	Shank1	ENSMUST00000107938	24	0.2143
B16F10 ATCC	chr11	60801574	.	A	C	NON_SYNONYMOUS_CODING	MODERATE	MISSENSE	Ttt/Gtt	F119V	c.355T>G	Shmt1	ENSMUST00000018744	5	0.1651
B16F10 ATCC	chr7	55768994	.	A	G	NON_SYNONYMOUS_CODING	MODERATE	MISSENSE	Atc/Gtc	I182V	c.544A>G	Siglech	ENSMUST00000165045	2	0.2500
B16F10 ATCC	chr7	55771700	.	A	G	SPLICE_SITE_REGION+INTRON	LOW				c.857+4A>G	Siglech	ENSMUST00000165045	4	0.2162
B16F10 ATCC	chr9	57086805	.	A	G	SPLICE_SITE_REGION+INTRON	LOW				c.189+4A>G	Sin3a	ENSMUST00000168177	2	0.5833
B16F10 ATCC	chr2	129618535	.	C	A	NON_SYNONYMOUS_CODING	MODERATE	MISSENSE	gCt/gAt	A391D	c.1172C>A	Sirpa	ENSMUST00000049262	5	0.3689
B16F10 ATCC	chr3	15410385	.	G	T	SPLICE_SITE_REGION+INTRON	LOW				c.1081+8C>A	Sirpb1a	ENSMUST00000099201	4	0.2098
B16F10 ATCC	chr18	76876080	.	AT	A	SPLICE_SITE_REGION+INTRON	LOW				c.2732-4delT	Skor2	ENSMUST00000166956	4	0.3654
B16F10 ATCC	chr1	171799592	.	T	G	NON_SYNONYMOUS_CODING	MODERATE	MISSENSE	gTt/gGt	V334G	c.1001T>G	Slamf1	ENSMUST00000015460	7	0.2481
B16F10 ATCC	chr8	5104912	.	C	G	NON_SYNONYMOUS_CODING	MODERATE	MISSENSE	gGc/gCc	G91A	c.272G>C	Slc10a2	ENSMUST00000023835	1	0.2273
B16F10 ATCC	chr2	125194139	.	T	C	NON_SYNONYMOUS_CODING	MODERATE	MISSENSE	Tcc/Ccc	S644P	c.1930T>C	Slc12a1	ENSMUST00000028630	16	0.2222
B16F10 ATCC	chr18	78115914	.	G	T	SPLICE_SITE_REGION+INTRON	LOW				c.305-4C>A	Slc14a1	ENSMUST00000160292	3	0.2364
B16F10 ATCC	chr18	78195780	.	T	G	NON_SYNONYMOUS_CODING	MODERATE	MISSENSE	aAg/aCg	K208T	c.623A>C	Slc14a2	ENSMUST00000025434	4	0.2462
B16F10 ATCC	chr14	121480054	.	C	T	NON_SYNONYMOUS_CODING	MODERATE	MISSENSE	cGg/cAg	R272Q	c.815G>A	Slc15a1	ENSMUST00000088386	11	0.2564
B16F10 ATCC	chr14	121491044	.	A	G	NON_SYNONYMOUS_CODING	MODERATE	MISSENSE	cTg/cCg	L65P	c.194T>C	Slc15a1	ENSMUST00000088386	4	0.2289
B16F10 ATCC	chr7	16797669	.	C	T	NON_SYNONYMOUS_CODING	MODERATE	MISSENSE	cCc/cTc	P533L	c.1598C>T	Slc1a5	ENSMUST00000108496	9	0.5172
B16F10 ATCC	chr19	6538463	.	G	A	NON_SYNONYMOUS_CODING	MODERATE	MISSENSE	Cac/Tac	H342Y	c.1024C>T	Slc22a12	ENSMUST00000113451	6	0.3684
B16F10 ATCC	chr17	12614776	.	G	A	NON_SYNONYMOUS_CODING	MODERATE	MISSENSE	Gaa/Aaa	E448K	c.1342G>A	Slc22a2	ENSMUST00000046959	8	0.2627
B16F10 ATCC	chr19	8062398	.	A	C	NON_SYNONYMOUS_CODING	MODERATE	MISSENSE	Tca/Gca	S537A	c.1609T>G	Slc22a28	ENSMUST00000065651	10	0.2833
B16F10 ATCC	chr17	12425681	.	A	T	STOP_GAINED	HIGH	NONSENSE	tgT/tgA	C472*	c.1416T>A	Slc22a3	ENSMUST00000024595	9	0.2576
B16F10 ATCC	chr19	8335775	.	C	A	NON_SYNONYMOUS_CODING	MODERATE	MISSENSE	Gtc/Ttc	V549F	c.1645G>T	Slc22a30	ENSMUST00000096269	10	0.2903
B16F10 ATCC	chr19	8621833	.	A	G	NON_SYNONYMOUS_CODING	MODERATE	MISSENSE	gAc/gGc	D276G	c.827A>G	Slc22a6	ENSMUST00000010250	5	0.6463
B16F10 ATCC	chr18	35624508	.	T	C	NON_SYNONYMOUS_CODING	MODERATE	MISSENSE	Aac/Gac	N237D	c.709A>G	Slc23a1	ENSMUST00000025212	7	0.2373
B16F10 ATCC	chr16	17927206	.	C	G	NON_SYNONYMOUS_CODING	MODERATE	MISSENSE	gGt/gCt	G130A	c.389G>C	Slc25a1	ENSMUST00000003622	4	0.2500
B16F10 ATCC	chr10	127173477	.	C	A	SPLICE_SITE_REGION+INTRON	LOW				c.1909+5G>T	Slc26a10	ENSMUST00000095270	16	0.2824
B16F10 ATCC	chr18	58556773	.	AG	A	FRAME_SHIFT	HIGH		gac/	D106fs	c.316delG	Slc27a6	ENSMUST00000025500	1	0.2676
B16F10 ATCC	chr18	58556780	.	A	T	NON_SYNONYMOUS_CODING	MODERATE	MISSENSE	gAc/gTc	D106V	c.317A>T	Slc27a6	ENSMUST00000025500	1	0.2808
B16F10 ATCC	chr7	81138168	.	C	G	NON_SYNONYMOUS_CODING	MODERATE	MISSENSE	Ccc/Gcc	P268A	c.802C>G	Slc28a1	ENSMUST00000026820	9	0.2194
B16F10 ATCC	chr2	27021987	.	G	A	NON_SYNONYMOUS_CODING	MODERATE	MISSENSE	cCt/cTt	P474L	c.1421C>T	Slc2a6	ENSMUST00000045702	10	0.2174
B16F10 ATCC	chr18	36683093	.	A	C	STOP_LOST	HIGH	MISSENSE	taA/taC	*325Yext*?	c.975A>C	Slc35a4	ENSMUST00000036158	3	0.6667
B16F10 ATCC	chr6	39364594	.	G	A	NON_SYNONYMOUS_CODING	MODERATE	MISSENSE	gCg/gTg	A36V	c.107C>T	Slc37a3	ENSMUST00000090243	3	0.1143
B16F10 ATCC	chr15	97790681	.	C	A	STOP_GAINED	HIGH	NONSENSE	taC/taA	Y133*	c.399C>A	Slc48a1	ENSMUST00000117892	3	0.8110
B16F10 ATCC	chr2	62228571	.	T	G	NON_SYNONYMOUS_CODING	MODERATE	MISSENSE	Ttg/Gtg	L141V	c.421T>G	Slc4a10	ENSMUST00000112480	5	0.2069
B16F10 ATCC	chr6	114315309	.	T	C	NON_SYNONYMOUS_CODING	MODERATE	MISSENSE	cTc/cCc	L567P	c.1700T>C	Slc6a1	ENSMUST00000032454	16	0.2022
B16F10 ATCC	chr6	121361067	.	T	G	NON_SYNONYMOUS_CODING	MODERATE	MISSENSE	Ttg/Gtg	L448V	c.1342T>G	Slc6a12	ENSMUST00000032200	11	0.2011
B16F10 ATCC	chr13	73689730	.	C	T	NON_SYNONYMOUS_CODING	MODERATE	MISSENSE	Gag/Aag	E217K	c.649G>A	Slc6a19	ENSMUST00000022048	4	0.3711
B16F10 ATCC	chr7	49911857	.	C	G	NON_SYNONYMOUS_CODING	MODERATE	MISSENSE	Ccc/Gcc	P46A	c.136C>G	Slc6a5	ENSMUST00000056442	2	0.3143
B16F10 ATCC	chr3	31223999	.	G	C	NON_SYNONYMOUS_CODING	MODERATE	MISSENSE	Ctg/Gtg	L486V	c.1456C>G	Slc7a14	ENSMUST00000091259	7	0.2062
B16F10 ATCC	chr12	81315655	.	T	A	NON_SYNONYMOUS_CODING	MODERATE	MISSENSE	aAt/aTt	N130I	c.389A>T	Slc8a3	ENSMUST00000182208	2	0.1842
B16F10 ATCC	chr9	103079527	.	C	A	NON_SYNONYMOUS_CODING	MODERATE	MISSENSE	Ctg/Atg	L513M	c.1537C>A	Slco2a1	ENSMUST00000035148	11	0.2381
B16F10 ATCC	chr13	56728628	.	A	T	NON_SYNONYMOUS_CODING+SPLICE_SITE_REGION	MODERATE	MISSENSE	agA/agT	R258S	c.774A>T	Smad5	ENSMUST00000069557	4	0.2800
B16F10 ATCC	chr10	128461434	.	G	C	NON_SYNONYMOUS_CODING	MODERATE	MISSENSE	gGc/gCc	G65A	c.194G>C	Smarcc2	ENSMUST00000105235	2	0.2955
B16F10 ATCC	chr16	32273215	.	A	T	NON_SYNONYMOUS_CODING	MODERATE	MISSENSE	gAt/gTt	D37V	c.110A>T	Smco1	ENSMUST00000093183	2	0.1610
B16F10 ATCC	chr7	118154635	.	A	C	NON_SYNONYMOUS_CODING	MODERATE	MISSENSE	Tta/Gta	L2572V	c.7714T>G	Smg1	ENSMUST00000032891	47	0.2035
B16F10 ATCC	chr7	118168661	.	C	A	STOP_GAINED	HIGH	NONSENSE	Gag/Tag	E1665*	c.4993G>T	Smg1	ENSMUST00000032891	33	0.2097
B16F10 ATCC	chr7	118178399	.	A	G	NON_SYNONYMOUS_CODING	MODERATE	MISSENSE	cTc/cCc	L1358P	c.4073T>C	Smg1	ENSMUST00000032891	28	0.2222
B16F10 ATCC	chr17	13236012	.	A	G	NON_SYNONYMOUS_CODING	MODERATE	MISSENSE	gAg/gGg	E353G	c.1058A>G	Smok2b	ENSMUST00000059824	1	0.0995
B16F10 ATCC	chr1	93286997	.	C	T	NON_SYNONYMOUS_CODING	MODERATE	MISSENSE	cCc/cTc	P1296L	c.3887C>T	Sned1	ENSMUST00000062202	27	0.2090
B16F10 ATCC	chr2	143070980	.	A	C	SPLICE_SITE_REGION+INTRON	LOW				c.518+4A>C	Snrpb2	ENSMUST00000008477	6	0.1888
B16F10 ATCC	chr19	6121411	.	T	C	NON_SYNONYMOUS_CODING	MODERATE	MISSENSE	gAa/gGa	E211G	c.632A>G	Snx15	ENSMUST00000025702	6	0.3768
B16F10 ATCC	chr2	144252491	.	C	T	NON_SYNONYMOUS_CODING	MODERATE	MISSENSE	cGa/cAa	R373Q	c.1118G>A	Snx5	ENSMUST00000028909	12	0.5236
B16F10 ATCC	chr17	13013538	.	T	A	NON_SYNONYMOUS_CODING	MODERATE	MISSENSE	cTt/cAt	L150H	c.449T>A	Sod2	ENSMUST00000007012	4	0.1849
B16F10 ATCC	chr19	50222143	.	C	G	NON_SYNONYMOUS_CODING	MODERATE	MISSENSE	caG/caC	Q761H	c.2283G>C	Sorcs1	ENSMUST00000072685	18	0.4250
B16F10 ATCC	chr2	152397465	.	C	G	NON_SYNONYMOUS_CODING	MODERATE	MISSENSE	tgG/tgC	W78C	c.234G>C	Sox12	ENSMUST00000063332	1	0.3000
B16F10 ATCC	chr7	115662361	.	C	G	NON_SYNONYMOUS_CODING	MODERATE	MISSENSE	Gca/Cca	A207P	c.619G>C	Sox6	ENSMUST00000072804	6	0.1522
B16F10 ATCC	chr3	100095630	.	A	G	NON_SYNONYMOUS_CODING	MODERATE	MISSENSE	aAg/aGg	K1890R	c.5669A>G	Spag17	ENSMUST00000164539	39	0.1944
B16F10 ATCC	chr5	26036002	.	T	G	NON_SYNONYMOUS_CODING	MODERATE	MISSENSE	aAg/aCg	K164T	c.491A>C	Speer4a	ENSMUST00000079447	4	0.1117
B16F10 ATCC	chr5	27497941	.	C	G	NON_SYNONYMOUS_CODING	MODERATE	MISSENSE	gaG/gaC	E188D	c.564G>C	Speer4b	ENSMUST00000053257	4	0.2023
B16F10 ATCC	chr5	17479479	.	A	C	NON_SYNONYMOUS_CODING	MODERATE	MISSENSE	gaA/gaC	E168D	c.504A>C	Speer4f	ENSMUST00000076099	4	0.2008
B16F10 ATCC	chr1	83276608	.	T	A	NON_SYNONYMOUS_CODING	MODERATE	MISSENSE	aAt/aTt	N1140I	c.3419A>T	Sphkap	ENSMUST00000160953	7	0.5137
B16F10 ATCC	chr18	44174559	.	G	C	NON_SYNONYMOUS_CODING	MODERATE	MISSENSE	Ctg/Gtg	L12V	c.34C>G	Spinkl	ENSMUST00000066328	2	0.3464
B16F10 ATCC	chr18	67495152	.	C	A	NON_SYNONYMOUS_CODING	MODERATE	MISSENSE	cGa/cTa	R554L	c.1661G>T	Spire1	ENSMUST00000045105	14	0.3563
B16F10 ATCC	chr2	172985452	.	G	A	NON_SYNONYMOUS_CODING	MODERATE	MISSENSE	Gcc/Acc	A153T	c.457G>A	Spo11	ENSMUST00000050442	5	0.3000
B16F10 ATCC	chr1	174192909	.	A	AT	SPLICE_SITE_REGION+INTRON	LOW				c.1594-4dupT	Spta1	ENSMUST00000027817	12	0.2139
B16F10 ATCC	chr1	174218515	.	G	A	NON_SYNONYMOUS_CODING	MODERATE	MISSENSE	cGg/cAg	R1615Q	c.4844G>A	Spta1	ENSMUST00000027817	34	0.2529
B16F10 ATCC	chr5	76149821	.	T	C	NON_SYNONYMOUS_CODING	MODERATE	MISSENSE	Ttt/Ctt	F157L	c.469T>C	Srd5a3	ENSMUST00000031143	4	0.2360
B16F10 ATCC	chr15	82194921	.	T	G	NON_SYNONYMOUS_CODING	MODERATE	MISSENSE	ttT/ttG	F823L	c.2469T>G	Srebf2	ENSMUST00000023100	14	0.3347
B16F10 ATCC	chr17	28599745	.	C	A	NON_SYNONYMOUS_CODING	MODERATE	MISSENSE	gaG/gaT	E372D	c.1116G>T	Srpk1	ENSMUST00000130643	11	0.1370
B16F10 ATCC	chr7	4928434	.	A	C	NON_SYNONYMOUS_CODING	MODERATE	MISSENSE	gaA/gaC	E213D	c.639A>C	Ssc5d	ENSMUST00000057612	6	0.5000
B16F10 ATCC	chr11	77449495	.	C	A	NON_SYNONYMOUS_CODING	MODERATE	MISSENSE	aCc/aAc	T491N	c.1472C>A	Ssh2	ENSMUST00000181283	13	0.2316
B16F10 ATCC	chr2	85040653	.	G	A	NON_SYNONYMOUS_CODING	MODERATE	MISSENSE	cGc/cAc	R211H	c.632G>A	Ssrp1	ENSMUST00000077798	6	0.2041
B16F10 ATCC	chrX	8589188	.	T	G	NON_SYNONYMOUS_CODING	MODERATE	MISSENSE	Agt/Cgt	S5R	c.13A>C	Ssxb3	ENSMUST00000089374	2	0.4690
B16F10 ATCC	chr6	17904973	.	A	C	SPLICE_SITE_REGION+INTRON	LOW				c.1151+4A>C	St7	ENSMUST00000081635	11	0.1644
B16F10 ATCC	chr2	14139090	.	C	A	STOP_GAINED	HIGH	NONSENSE	tCg/tAg	S397*	c.1190C>A	Stam	ENSMUST00000102960	12	0.1864
B16F10 ATCC	chr19	34226627	.	A	T	NON_SYNONYMOUS_CODING	MODERATE	MISSENSE	aAt/aTt	N39I	c.116A>T	Stambpl1	ENSMUST00000054956	3	0.3243
B16F10 ATCC	chr5	86090891	.	T	G	SPLICE_SITE_REGION+INTRON	LOW				c.537-6T>G	Stap1	ENSMUST00000031171	5	0.3191
B16F10 ATCC	chr18	33203717	.	G	T	NON_SYNONYMOUS_CODING	MODERATE	MISSENSE	Cag/Aag	Q182K	c.544C>A	Stard4	ENSMUST00000025236	6	0.2951
B16F10 ATCC	chr18	33203720	.	T	C	NON_SYNONYMOUS_CODING	MODERATE	MISSENSE	Agc/Ggc	S181G	c.541A>G	Stard4	ENSMUST00000025236	6	0.2742
B16F10 ATCC	chr11	100905846	.	C	T	NON_SYNONYMOUS_CODING	MODERATE	MISSENSE	cGg/cAg	R152Q	c.455G>A	Stat3	ENSMUST00000127638	5	0.2653
B16F10 ATCC	chr4	115006693	.	T	G	NON_SYNONYMOUS_CODING	MODERATE	MISSENSE	cTt/cGt	L44R	c.131T>G	Stil	ENSMUST00000030490	4	0.3503
B16F10 ATCC	chr6	49417188	.	G	T	SPLICE_SITE_ACCEPTOR+INTRON	HIGH				c.484-1G>T	Stk31	ENSMUST00000024171	6	0.2781
B16F10 ATCC	chr6	49417396	.	C	T	NON_SYNONYMOUS_CODING	MODERATE	MISSENSE	Ctt/Ttt	L231F	c.691C>T	Stk31	ENSMUST00000024171	7	0.1307
B16F10 ATCC	chr12	91649067	.	T	G	NON_SYNONYMOUS_CODING	MODERATE	MISSENSE	aAc/aCc	N189T	c.566A>C	Ston2	ENSMUST00000164713	4	0.3548
B16F10 ATCC	chr12	51643136	.	T	C	NON_SYNONYMOUS_CODING	MODERATE	MISSENSE	aAg/aGg	K355R	c.1064A>G	Strn3	ENSMUST00000013130	8	0.1797
B16F10 ATCC	chr16	37204489	.	T	G	NON_SYNONYMOUS_CODING	MODERATE	MISSENSE	caA/caC	Q582H	c.1746A>C	Stxbp5l	ENSMUST00000114787	17	0.2316
B16F10 ATCC	chr7	13804132	.	C	A	SPLICE_SITE_REGION+INTRON	LOW				c.473-8G>T	Sult2a1	ENSMUST00000108522	3	0.1280
B16F10 ATCC	chr7	13662548	.	T	A	NON_SYNONYMOUS_CODING	MODERATE	MISSENSE	Ttg/Atg	L187M	c.559T>A	Sult2a5	ENSMUST00000108525	4	0.1833
B16F10 ATCC	chr7	14225892	.	T	C	NON_SYNONYMOUS_CODING	MODERATE	MISSENSE	Att/Gtt	I239V	c.715A>G	Sult2a6	ENSMUST00000076576	5	0.2658
B16F10 ATCC	chr7	14225894	.	T	C	NON_SYNONYMOUS_CODING	MODERATE	MISSENSE	cAg/cGg	Q238R	c.713A>G	Sult2a6	ENSMUST00000076576	5	0.2735
B16F10 ATCC	chr17	45048367	.	A	G	NON_SYNONYMOUS_CODING	MODERATE	MISSENSE	aAg/aGg	K346R	c.1037A>G	Supt3	ENSMUST00000129416	10	0.2286
B16F10 ATCC	chr2	178374367	.	T	G	NON_SYNONYMOUS_CODING	MODERATE	MISSENSE	gaA/gaC	E767D	c.2301A>C	Sycp2	ENSMUST00000081134	23	0.2716
B16F10 ATCC	chr2	178381934	.	C	T	NON_SYNONYMOUS_CODING	MODERATE	MISSENSE	Gtc/Atc	V430I	c.1288G>A	Sycp2	ENSMUST00000081134	17	0.3457
B16F10 ATCC	chr12	75942835	.	T	G	SPLICE_SITE_REGION+INTRON	LOW				c.5495-8T>G	Syne2	ENSMUST00000044217	37	0.2105
B16F10 ATCC	chr7	30316336	.	C	G	NON_SYNONYMOUS_CODING	MODERATE	MISSENSE	tCt/tGt	S125C	c.374C>G	Syne4	ENSMUST00000054594	3	0.2118
B16F10 ATCC	chr7	67751886	.	A	C	NON_SYNONYMOUS_CODING	MODERATE	MISSENSE	Ttg/Gtg	L285V	c.853T>G	Synm	ENSMUST00000074233	2	0.2128
B16F10 ATCC	chr14	20665967	.	T	G	NON_SYNONYMOUS_CODING	MODERATE	MISSENSE	gaA/gaC	E183D	c.549A>C	Synpo2l	ENSMUST00000117386	3	0.3333
B16F10 ATCC	chr11	84009478	.	G	T	NON_SYNONYMOUS_CODING	MODERATE	MISSENSE	Gat/Tat	D938Y	c.2812G>T	Synrg	ENSMUST00000183456	15	0.2393
B16F10 ATCC	chr15	89841639	.	C	T	NON_SYNONYMOUS_CODING	MODERATE	MISSENSE	gGc/gAc	G44D	c.131G>A	Syt10	ENSMUST00000029441	1	0.3243
B16F10 ATCC	chr4	141118587	.	C	A	NON_SYNONYMOUS_CODING	MODERATE	MISSENSE	cGg/cTg	R99L	c.296G>T	Szrd1	ENSMUST00000102487	3	0.3598
B16F10 ATCC	chr10	24108965	.	G	C	NON_SYNONYMOUS_CODING	MODERATE	MISSENSE	tgC/tgG	C190W	c.570C>G	Taar9	ENSMUST00000041180	1	0.1796
B16F10 ATCC	chr10	7920266	.	A	T	NON_SYNONYMOUS_CODING	MODERATE	MISSENSE	Tca/Aca	S151T	c.451T>A	Tab2	ENSMUST00000146444	3	0.2711
B16F10 ATCC	chr8	119599093	.	G	T	NON_SYNONYMOUS_CODING	MODERATE	MISSENSE	Cag/Aag	Q677K	c.2029C>A	Taf1c	ENSMUST00000093099	15	0.2857
B16F10 ATCC	chr8	123997338	.	C	A	STOP_GAINED	HIGH	NONSENSE	Gga/Tga	G581*	c.1741G>T	Taf5l	ENSMUST00000093039	5	0.2233
B16F10 ATCC	chr15	11391884	.	G	T	NON_SYNONYMOUS_CODING	MODERATE	MISSENSE	cCt/cAt	P255H	c.764C>A	Tars	ENSMUST00000022849	8	0.1444
B16F10 ATCC	chr4	139660424	.	C	T	NON_SYNONYMOUS_CODING	MODERATE	MISSENSE	gCg/gTg	A398V	c.1193C>T	Tas1r2	ENSMUST00000030510	3	1.0000
B16F10 ATCC	chr6	132980301	.	T	C	NON_SYNONYMOUS_CODING	MODERATE	MISSENSE	cAg/cGg	Q222R	c.665A>G	Tas2r109	ENSMUST00000067539	1	0.1686
B16F10 ATCC	chr6	132737081	.	G	T	STOP_GAINED	HIGH	NONSENSE	tgC/tgA	C302*	c.906C>A	Tas2r115	ENSMUST00000095394	1	0.1517
B16F10 ATCC	chr6	132855948	.	A	G	NON_SYNONYMOUS_CODING	MODERATE	MISSENSE	Aac/Gac	N171D	c.511A>G	Tas2r116	ENSMUST00000032315	1	0.1575
B16F10 ATCC	chr6	132803295	.	G	A	NON_SYNONYMOUS_CODING	MODERATE	MISSENSE	aGa/aAa	R132K	c.395G>A	Tas2r117	ENSMUST00000068302	1	0.1866
B16F10 ATCC	chr6	40612495	.	C	T	STOP_GAINED	HIGH	NONSENSE	tgG/tgA	W272*	c.816G>A	Tas2r138	ENSMUST00000076565	1	0.1429
B16F10 ATCC	chr6	133054935	.	A	G	NON_SYNONYMOUS_CODING	MODERATE	MISSENSE	Tct/Cct	S287P	c.859T>C	Tas2r140	ENSMUST00000095391	1	0.1393
B16F10 ATCC	chr5	64275393	.	A	G	SPLICE_SITE_ACCEPTOR+INTRON	HIGH				c.1285-2A>G	Tbc1d1	ENSMUST00000043893	7	0.3797
B16F10 ATCC	chr2	30134872	.	T	C	SPLICE_SITE_DONOR+INTRON	HIGH				c.97+2T>C	Tbc1d13	ENSMUST00000044556	2	0.2680
B16F10 ATCC	chr14	101452423	.	A	C	NON_SYNONYMOUS_CODING	MODERATE	MISSENSE	gTt/gGt	V1112G	c.3335T>G	Tbc1d4	ENSMUST00000162617	18	0.2843
B16F10 ATCC	chr17	50963696	.	C	A	NON_SYNONYMOUS_CODING	MODERATE	MISSENSE	aGa/aTa	R169I	c.506G>T	Tbc1d5	ENSMUST00000024717	8	0.2941
B16F10 ATCC	chr11	121575312	.	CA	C	FRAME_SHIFT	HIGH		gca/	A588fs	c.1764delA	Tbcd	ENSMUST00000103013	19	0.2402
B16F10 ATCC	chr10	81333215	.	G	C	NON_SYNONYMOUS_CODING	MODERATE	MISSENSE	gGc/gCc	G246A	c.737G>C	Tbxa2r	ENSMUST00000105325	2	1.0000
B16F10 ATCC	chr12	101693214	.	A	G	SPLICE_SITE_REGION+INTRON	LOW				c.467-8T>C	Tc2n	ENSMUST00000160830	4	0.1961
B16F10 ATCC	chr9	122833657	.	A	C	NON_SYNONYMOUS_CODING+SPLICE_SITE_REGION	MODERATE	MISSENSE	aAg/aCg	K430T	c.1289A>C	Tcaim	ENSMUST00000052740	10	0.2796
B16F10 ATCC	chr3	93445682	.	C	T	STOP_GAINED	HIGH	NONSENSE	Caa/Taa	Q810*	c.2428C>T	Tchh	ENSMUST00000064257	2	0.2491
B16F10 ATCC	chr17	7326449	.	G	C	NON_SYNONYMOUS_CODING	MODERATE	MISSENSE	Gct/Cct	A58P	c.172G>C	Tcp10a	ENSMUST00000095726	4	0.2359
B16F10 ATCC	chr5	122251641	.	C	G	NON_SYNONYMOUS_CODING	MODERATE	MISSENSE	Gct/Cct	A273P	c.817G>C	Tctn1	ENSMUST00000111738	6	0.2673
B16F10 ATCC	chr19	40607346	.	A	C	NON_SYNONYMOUS_CODING	MODERATE	MISSENSE	Ttc/Gtc	F332V	c.994T>G	Tctn3	ENSMUST00000025981	9	0.5000
B16F10 ATCC	chr3	93671233	.	A	C	NON_SYNONYMOUS_CODING	MODERATE	MISSENSE	caT/caG	H81Q	c.243T>G	Tdpoz1	ENSMUST00000094413	1	0.2396
B16F10 ATCC	chr17	43626518	.	T	G	NON_SYNONYMOUS_CODING	MODERATE	MISSENSE	gAg/gCg	E1213A	c.3638A>C	Tdrd6	ENSMUST00000168073	1	0.4200
B16F10 ATCC	chr6	128270904	.	G	C	NON_SYNONYMOUS_CODING	MODERATE	MISSENSE	Cgc/Ggc	R57G	c.169C>G	Tead4	ENSMUST00000006311	2	0.2500
B16F10 ATCC	chr1	153892026	.	G	A	NON_SYNONYMOUS_CODING	MODERATE	MISSENSE	Ggg/Agg	G79R	c.235G>A	Teddm1a	ENSMUST00000050660	1	0.2313
B16F10 ATCC	chr16	10358377	.	G	A	NON_SYNONYMOUS_CODING	MODERATE	MISSENSE	Cgg/Tgg	R435W	c.1303C>T	Tekt5	ENSMUST00000043415	7	0.1887
B16F10 ATCC	chrX	42899835	.	G	A	NON_SYNONYMOUS_CODING	MODERATE	MISSENSE	Cca/Tca	P290S	c.868C>T	Tenm1	ENSMUST00000016294	6	0.5349
B16F10 ATCC	chr11	36273267	.	C	T	NON_SYNONYMOUS_CODING	MODERATE	MISSENSE	Gcc/Acc	A384T	c.1150G>A	Tenm2	ENSMUST00000057207	5	0.2281
B16F10 ATCC	chr8	107081223	.	A	G	NON_SYNONYMOUS_CODING	MODERATE	MISSENSE	cTc/cCc	L240P	c.719T>C	Terf2	ENSMUST00000068421	5	0.1250
B16F10 ATCC	chr4	48462864	.	T	G	NON_SYNONYMOUS_CODING	MODERATE	MISSENSE	aaA/aaC	K384N	c.1152A>C	Tex10	ENSMUST00000030030	5	0.2571
B16F10 ATCC	chr8	33571315	.	A	C	NON_SYNONYMOUS_CODING	MODERATE	MISSENSE	Aaa/Caa	K258Q	c.772A>C	Tex15	ENSMUST00000009772	1	0.2961
B16F10 ATCC	chr8	33571810	.	A	G	NON_SYNONYMOUS_CODING	MODERATE	MISSENSE	Atc/Gtc	I423V	c.1267A>G	Tex15	ENSMUST00000009772	1	0.2908
B16F10 ATCC	chr13	56629834	.	A	C	SPLICE_SITE_REGION+INTRON	LOW				c.1126+4A>C	Tgfbi	ENSMUST00000045173	8	0.3571
B16F10 ATCC	chr13	92754445	.	A	T	SPLICE_SITE_REGION+INTRON	LOW				c.2518-5T>A	Thbs4	ENSMUST00000022213	19	0.4651
B16F10 ATCC	chr15	74721569	.	G	A	NON_SYNONYMOUS_CODING	MODERATE	MISSENSE	cGc/cAc	R92H	c.275G>A	Them6	ENSMUST00000070923	1	0.3529
B16F10 ATCC	chr11	4902078	.	G	T	SPLICE_SITE_REGION+INTRON	LOW				c.241-8G>T	Thoc5	ENSMUST00000038237	3	0.2009
B16F10 ATCC	chr4	126165462	.	T	C	NON_SYNONYMOUS_CODING	MODERATE	MISSENSE	atA/atG	I930M	c.2790A>G	Thrap3	ENSMUST00000080919	11	0.2362
B16F10 ATCC	chr4	126165496	.	GC	G	FRAME_SHIFT	HIGH		gcc/	A919fs	c.2755delG	Thrap3	ENSMUST00000080919	11	0.2268
B16F10 ATCC	chr4	126165536	.	G	A	NON_SYNONYMOUS_CODING	MODERATE	MISSENSE	Cgg/Tgg	R906W	c.2716C>T	Thrap3	ENSMUST00000080919	11	0.2360
B16F10 ATCC	chr8	22252219	.	G	A	NON_SYNONYMOUS_CODING	MODERATE	MISSENSE	cGt/cAt	R362H	c.1085G>A	Thsd1	ENSMUST00000069828	4	0.2481
B16F10 ATCC	chr1	129678141	.	C	A	NON_SYNONYMOUS_CODING	MODERATE	MISSENSE	Cca/Aca	P540T	c.1618C>A	Thsd7b	ENSMUST00000073527	7	0.1781
B16F10 ATCC	chr1	130189892	.	A	T	NON_SYNONYMOUS_CODING	MODERATE	MISSENSE	aAg/aTg	K1382M	c.4145A>T	Thsd7b	ENSMUST00000073527	23	0.1585
B16F10 ATCC	chr6	113056030	.	C	G	NON_SYNONYMOUS_CODING	MODERATE	MISSENSE	aCc/aGc	T243S	c.728C>G	Thumpd3	ENSMUST00000032398	4	0.3267
B16F10 ATCC	chr17	3415019	.	C	T	NON_SYNONYMOUS_CODING	MODERATE	MISSENSE	tCc/tTc	S341F	c.1022C>T	Tiam2	ENSMUST00000072156	3	0.2131
B16F10 ATCC	chr4	118484429	.	A	G	NON_SYNONYMOUS_CODING	MODERATE	MISSENSE	Tgc/Cgc	C229R	c.685T>C	Tie1	ENSMUST00000047421	5	0.3000
B16F10 ATCC	chr8	4268004	.	C	T	NON_SYNONYMOUS_CODING	MODERATE	MISSENSE	Gaa/Aaa	E135K	c.403G>A	Timm44	ENSMUST00000003029	5	0.2317
B16F10 ATCC	chr14	50362338	.	T	G	NON_SYNONYMOUS_CODING	MODERATE	MISSENSE	Ttt/Gtt	F594V	c.1780T>G	Tlr11	ENSMUST00000185091	2	0.3372
B16F10 ATCC	chr19	41232378	.	A	G	NON_SYNONYMOUS_CODING	MODERATE	MISSENSE	Tac/Cac	Y382H	c.1144T>C	Tm9sf3	ENSMUST00000025989	9	0.4872
B16F10 ATCC	chr5	3670125	.	C	T	SPLICE_SITE_REGION+INTRON	LOW				c.627+4C>T	Tmbim7	ENSMUST00000014673	8	0.1833
B16F10 ATCC	chr7	83603468	.	A	C	NON_SYNONYMOUS_CODING	MODERATE	MISSENSE	aAg/aCg	K359T	c.1076A>C	Tmc3	ENSMUST00000039317	10	0.2179
B16F10 ATCC	chr19	10858935	.	G	A	NON_SYNONYMOUS_CODING	MODERATE	MISSENSE	Cgc/Tgc	R744C	c.2230C>T	Tmem132a	ENSMUST00000025645	11	0.2143
B16F10 ATCC	chr5	127504921	.	G	A	NON_SYNONYMOUS_CODING	MODERATE	MISSENSE	aGc/aAc	S400N	c.1199G>A	Tmem132c	ENSMUST00000119026	4	0.2063
B16F10 ATCC	chr17	6301414	.	A	C	NON_SYNONYMOUS_CODING	MODERATE	MISSENSE	aAg/aCg	K356T	c.1067A>C	Tmem181a	ENSMUST00000088940	13	0.1969
B16F10 ATCC	chr2	167644864	.	G	C	STOP_GAINED	HIGH	NONSENSE	taC/taG	Y198*	c.594C>G	Tmem189	ENSMUST00000006587	5	0.2083
B16F10 ATCC	chr1	75480262	.	C	A	NON_SYNONYMOUS_CODING	MODERATE	MISSENSE	Cag/Aag	Q11K	c.31C>A	Tmem198	ENSMUST00000050899	1	0.2093
B16F10 ATCC	chr7	126891674	.	G	C	NON_SYNONYMOUS_CODING	MODERATE	MISSENSE	Cca/Gca	P204A	c.610C>G	Tmem219	ENSMUST00000120007	3	0.2917
B16F10 ATCC	chr4	49587135	.	A	G	NON_SYNONYMOUS_CODING	MODERATE	MISSENSE	cTt/cCt	L11P	c.32T>C	Tmem246	ENSMUST00000042750	2	0.5417
B16F10 ATCC	chr16	38575778	.	C	A	NON_SYNONYMOUS_CODING	MODERATE	MISSENSE	ttC/ttA	F124L	c.372C>A	Tmem39a	ENSMUST00000002924	4	0.2156
B16F10 ATCC	chr4	129692477	.	C	G	NON_SYNONYMOUS_CODING	MODERATE	MISSENSE	Gcc/Ccc	A131P	c.391G>C	Tmem39b	ENSMUST00000102588	4	0.2740
B16F10 ATCC	chr9	31428027	.	A	G	NON_SYNONYMOUS_CODING	MODERATE	MISSENSE	Ttc/Ctc	F217L	c.649T>C	Tmem45b	ENSMUST00000048050	5	0.2083
B16F10 ATCC	chr14	50928918	.	G	A	SPLICE_SITE_REGION+INTRON	LOW				c.621-7C>T	Tmem55b	ENSMUST00000160835	5	0.2714
B16F10 ATCC	chr4	43670037	.	G	A	SPLICE_SITE_REGION+INTRON	LOW				c.415+3G>A	Tmem8b	ENSMUST00000107866	1	0.2692
B16F10 ATCC	chr9	45175465	.	T	A	NON_SYNONYMOUS_CODING	MODERATE	MISSENSE	Aac/Tac	N333Y	c.997A>T	Tmprss4	ENSMUST00000034599	10	0.7688
B16F10 ATCC	chr3	154939670	.	G	C	NON_SYNONYMOUS_CODING	MODERATE	MISSENSE	gCc/gGc	A526G	c.1577C>G	Tnni3k	ENSMUST00000064076	16	0.2745
B16F10 ATCC	chr13	98860670	.	C	G	NON_SYNONYMOUS_CODING	MODERATE	MISSENSE	gGc/gCc	G425A	c.1274G>C	Tnpo1	ENSMUST00000109401	12	0.2625
B16F10 ATCC	chr6	29565843	.	C	G	NON_SYNONYMOUS_CODING	MODERATE	MISSENSE	gGc/gCc	G504A	c.1511G>C	Tnpo3	ENSMUST00000115251	12	0.4333
B16F10 ATCC	chr1	159895095	.	T	C	NON_SYNONYMOUS_CODING	MODERATE	MISSENSE	Ttc/Ctc	F1037L	c.3109T>C	Tnr	ENSMUST00000111669	15	0.1591
B16F10 ATCC	chr15	80927690	.	C	T	STOP_GAINED	HIGH	NONSENSE	Cga/Tga	R1666*	c.4996C>T	Tnrc6b	ENSMUST00000067689	24	0.2016
B16F10 ATCC	chr4	6688450	.	C	A	NON_SYNONYMOUS_CODING	MODERATE	MISSENSE	aGg/aTg	R519M	c.1556G>T	Tox	ENSMUST00000039987	9	0.2695
B16F10 ATCC	chr12	30094782	.	T	C	NON_SYNONYMOUS_CODING	MODERATE	MISSENSE	gAc/gGc	D656G	c.1967A>G	Tpo	ENSMUST00000021005	11	0.4143
B16F10 ATCC	chr9	111364710	.	G	A	NON_SYNONYMOUS_CODING	MODERATE	MISSENSE	Gac/Aac	D601N	c.1801G>A	Trank1	ENSMUST00000078626	11	0.3636
B16F10 ATCC	chr14	53704239	.	A	G	NON_SYNONYMOUS_CODING	MODERATE	MISSENSE	gAg/gGg	E23G	c.68A>G	Trav5-4	ENSMUST00000103664	2	0.3333
B16F10 ATCC	chr6	41135219	.	A	C	SPLICE_SITE_REGION+INTRON	LOW				c.49+4A>C	Trbv14	ENSMUST00000103272	1	0.1333
B16F10 ATCC	chr6	41135395	.	G	A	NON_SYNONYMOUS_CODING	MODERATE	MISSENSE	tGt/tAt	C42Y	c.125G>A	Trbv14	ENSMUST00000103272	2	0.1774
B16F10 ATCC	chr6	41227962	.	T	G	NON_SYNONYMOUS_CODING	MODERATE	MISSENSE	Tca/Gca	S106A	c.316T>G	Trbv26	ENSMUST00000193064	2	0.0925
B16F10 ATCC	chr6	41048574	.	G	T	NON_SYNONYMOUS_CODING	MODERATE	MISSENSE	Gat/Tat	D33Y	c.97G>T	Trbv3	ENSMUST00000103264	2	0.1183
B16F10 ATCC	chr6	53818920	.	G	A	NON_SYNONYMOUS_CODING	MODERATE	MISSENSE	aCg/aTg	T439M	c.1316C>T	Tril	ENSMUST00000127748	1	0.5179
B16F10 ATCC	chr6	37927522	.	T	G	SPLICE_SITE_REGION+INTRON	LOW				c.882-4T>G	Trim24	ENSMUST00000031859	5	0.1654
B16F10 ATCC	chr7	104435654	.	C	A	NON_SYNONYMOUS_CODING	MODERATE	MISSENSE	tgG/tgT	W116C	c.348G>T	Trim30a	ENSMUST00000076922	2	0.2132
B16F10 ATCC	chr7	104366100	.	C	A	NON_SYNONYMOUS_CODING	MODERATE	MISSENSE	aGc/aTc	S27I	c.80G>T	Trim30b	ENSMUST00000106831	1	0.1890
B16F10 ATCC	chr9	97369622	.	T	G	NON_SYNONYMOUS_CODING	MODERATE	MISSENSE	Aac/Cac	N75H	c.223A>C	Trim42	ENSMUST00000035026	1	0.4744
B16F10 ATCC	chr9	88582989	.	GATTT	G	SPLICE_SITE_REGION+INTRON	LOW				c.412-8_412-5delTATT	Trim43a	ENSMUST00000164661	2	0.8571
B16F10 ATCC	chr3	100925640	.	A	C	NON_SYNONYMOUS_CODING	MODERATE	MISSENSE	gaA/gaC	E396D	c.1188A>C	Trim45	ENSMUST00000163914	2	0.1186
B16F10 ATCC	chr7	104266225	.	C	T	NON_SYNONYMOUS_CODING	MODERATE	MISSENSE	Gct/Act	A294T	c.880G>A	Trim5	ENSMUST00000098179	7	0.2535
B16F10 ATCC	chr8	124817041	.	A	G	NON_SYNONYMOUS_CODING	MODERATE	MISSENSE	cAg/cGg	Q380R	c.1139A>G	Trim67	ENSMUST00000041106	3	0.2444
B16F10 ATCC	chr7	128010204	.	G	C	NON_SYNONYMOUS_CODING	MODERATE	MISSENSE	Gcg/Ccg	A393P	c.1177G>C	Trim72	ENSMUST00000081042	6	0.2273
B16F10 ATCC	chr8	43130398	.	T	A	NON_SYNONYMOUS_CODING	MODERATE	MISSENSE	Att/Ttt	I389F	c.1165A>T	Triml1	ENSMUST00000059692	6	0.2603
B16F10 ATCC	chr1	84766168	.	A	C	NON_SYNONYMOUS_CODING	MODERATE	MISSENSE	aaT/aaG	N500K	c.1500T>G	Trip12	ENSMUST00000027421	9	0.2370
B16F10 ATCC	chr9	65839045	.	A	C	SPLICE_SITE_REGION+INTRON	LOW				c.1576-8T>G	Trip4	ENSMUST00000117083	11	0.7083
B16F10 ATCC	chr9	65864415	.	G	A	STOP_GAINED	HIGH	NONSENSE	Cga/Tga	R278*	c.832C>T	Trip4	ENSMUST00000117083	7	0.5526
B16F10 ATCC	chr11	69588379	.	A	G	NON_SYNONYMOUS_CODING	MODERATE	MISSENSE	Aat/Gat	N128D	c.382A>G	Trp53	ENSMUST00000108658	5	0.3115
B16F10 ATCC	chr2	121253645	.	T	C	NON_SYNONYMOUS_CODING	MODERATE	MISSENSE	Aaa/Gaa	K247E	c.739A>G	Trp53bp1	ENSMUST00000110648	7	0.2313
B16F10 ATCC	chr16	25763313	.	G	A	NON_SYNONYMOUS_CODING	MODERATE	MISSENSE	aGa/aAa	R37K	c.110G>A	Trp63	ENSMUST00000115310	2	0.5081
B16F10 ATCC	chr7	102090607	.	G	T	NON_SYNONYMOUS_CODING	MODERATE	MISSENSE	aaG/aaT	K953N	c.2859G>T	Trpc2	ENSMUST00000084843	18	0.2667
B16F10 ATCC	chr7	102090607	.	G	T	NON_SYNONYMOUS_CODING	MODERATE	MISSENSE	aaG/aaT	K579N	c.1737G>T	TRPC2	ENSMUST00000124189	8	0.2667
B16F10 ATCC	chr2	126797281	.	G	T	NON_SYNONYMOUS_CODING	MODERATE	MISSENSE	gCa/gAa	A1711E	c.5132C>A	Trpm7	ENSMUST00000103224	36	0.1813
B16F10 ATCC	chr15	50661679	.	G	C	NON_SYNONYMOUS_CODING	MODERATE	MISSENSE	Cgg/Ggg	R952G	c.2854C>G	Trps1	ENSMUST00000183757	6	0.1607
B16F10 ATCC	chr5	144834197	.	A	G	NON_SYNONYMOUS_CODING	MODERATE	MISSENSE	aAa/aGa	K2801R	c.8402A>G	Trrap	ENSMUST00000094120	55	0.5035
B16F10 ATCC	chr6	41356692	.	G	A	NON_SYNONYMOUS_CODING	MODERATE	MISSENSE	Gcc/Acc	A124T	c.370G>A	Try10	ENSMUST00000072103	3	0.1176
B16F10 ATCC	chr14	40916954	.	G	A	SPLICE_SITE_REGION+INTRON	LOW				c.133-5C>T	Tspan14	ENSMUST00000047652	3	0.6232
B16F10 ATCC	chr3	138898326	.	G	C	NON_SYNONYMOUS_CODING	MODERATE	MISSENSE	tgG/tgC	W228C	c.684G>C	Tspan5	ENSMUST00000029800	7	0.1750
B16F10 ATCC	chr10	77870554	.	G	C	SPLICE_SITE_REGION+INTRON	LOW				c.999+8G>C	Tspear	ENSMUST00000092368	6	0.2857
B16F10 ATCC	chr14	55650923	.	A	G	NON_SYNONYMOUS_CODING	MODERATE	MISSENSE	aAg/aGg	K83R	c.248A>G	Tssk4	ENSMUST00000007735	2	0.2806
B16F10 ATCC	chr17	46446325	.	C	A	NON_SYNONYMOUS_CODING	MODERATE	MISSENSE	Gcc/Tcc	A1128S	c.3382G>T	Ttbk1	ENSMUST00000047034	14	0.2813
B16F10 ATCC	chr2	32769116	.	A	T	NON_SYNONYMOUS_CODING	MODERATE	MISSENSE	Ttg/Atg	L381M	c.1141T>A	Ttc16	ENSMUST00000161430	9	0.1786
B16F10 ATCC	chr2	32769333	.	C	A	NON_SYNONYMOUS_CODING	MODERATE	MISSENSE	ttG/ttT	L308F	c.924G>T	Ttc16	ENSMUST00000161430	9	0.2500
B16F10 ATCC	chr15	10533667	.	C	A	NON_SYNONYMOUS_CODING	MODERATE	MISSENSE	agG/agT	R263S	c.789G>T	Ttc23l	ENSMUST00000022857	6	0.3077
B16F10 ATCC	chr5	111286315	.	G	C	NON_SYNONYMOUS_CODING	MODERATE	MISSENSE	gGc/gCc	G2405A	c.7214G>C	Ttc28	ENSMUST00000040111	24	0.2250
B16F10 ATCC	chr2	75937982	.	T	G	NON_SYNONYMOUS_CODING	MODERATE	MISSENSE	gaA/gaC	E142D	c.426A>C	Ttc30b	ENSMUST00000099996	1	0.2444
B16F10 ATCC	chr18	12686963	.	G	T	NON_SYNONYMOUS_CODING	MODERATE	MISSENSE	atG/atT	M73I	c.219G>T	Ttc39c	ENSMUST00000025294	3	0.2195
B16F10 ATCC	chr15	83498189	.	C	T	NON_SYNONYMOUS_CODING	MODERATE	MISSENSE	Gtc/Atc	V201I	c.601G>A	Ttll1	ENSMUST00000016897	7	0.1692
B16F10 ATCC	chr15	83582078	.	T	C	NON_SYNONYMOUS_CODING	MODERATE	MISSENSE	cAg/cGg	Q394R	c.1181A>G	Ttll12	ENSMUST00000016901	8	0.7846
B16F10 ATCC	chr17	7351526	.	T	G	NON_SYNONYMOUS_CODING	MODERATE	MISSENSE	gAt/gCt	D334A	c.1001A>C	Ttll2	ENSMUST00000115747	2	0.2330
B16F10 ATCC	chr17	7351955	.	T	C	NON_SYNONYMOUS_CODING	MODERATE	MISSENSE	aAg/aGg	K191R	c.572A>G	Ttll2	ENSMUST00000115747	2	0.1643
B16F10 ATCC	chr2	76738687	.	T	G	NON_SYNONYMOUS_CODING	MODERATE	MISSENSE	gaA/gaC	E27287D	c.81861A>C	Ttn	ENSMUST00000099981	309	0.2439
B16F10 ATCC	chr2	76746951	.	C	G	NON_SYNONYMOUS_CODING	MODERATE	MISSENSE	Gaa/Caa	E24533Q	c.73597G>C	Ttn	ENSMUST00000099981	309	0.2561
B16F10 ATCC	chr2	76752230	.	G	T	NON_SYNONYMOUS_CODING	MODERATE	MISSENSE	gCg/gAg	A22773E	c.68318C>A	Ttn	ENSMUST00000099981	309	0.2655
B16F10 ATCC	chr2	76752519	.	A	G	NON_SYNONYMOUS_CODING	MODERATE	MISSENSE	Tgg/Cgg	W22677R	c.68029T>C	Ttn	ENSMUST00000099981	309	0.2252
B16F10 ATCC	chr2	76787269	.	T	G	NON_SYNONYMOUS_CODING	MODERATE	MISSENSE	aAg/aCg	K16286T	c.48857A>C	Ttn	ENSMUST00000099981	254	0.2644
B16F10 ATCC	chr2	76831208	.	G	A	NON_SYNONYMOUS_CODING	MODERATE	MISSENSE	cCa/cTa	P11941L	c.35822C>T	Ttn	ENSMUST00000099981	173	0.2275
B16F10 ATCC	chr2	76848325	.	T	G	NON_SYNONYMOUS_CODING	MODERATE	MISSENSE	aaA/aaC	K10892N	c.32676A>C	Ttn	ENSMUST00000099981	140	0.5234
B16F10 ATCC	chr13	3933511	.	A	C	NON_SYNONYMOUS_CODING	MODERATE	MISSENSE	gaA/gaC	E430D	c.1290A>C	Tubal3	ENSMUST00000021639	4	0.3750
B16F10 ATCC	chr8	123421534	.	G	C	NON_SYNONYMOUS_CODING	MODERATE	MISSENSE	gGc/gCc	G402A	c.1205G>C	Tubb3	ENSMUST00000071134	4	0.2308
B16F10 ATCC	chr11	86549470	.	G	A	NON_SYNONYMOUS_CODING+SPLICE_SITE_REGION	MODERATE	MISSENSE	Ggt/Agt	G107S	c.319G>A	Tubd1	ENSMUST00000020821	3	0.1591
B16F10 ATCC	chr11	86555167	.	A	T	NON_SYNONYMOUS_CODING	MODERATE	MISSENSE	aAg/aTg	K211M	c.632A>T	Tubd1	ENSMUST00000020821	5	0.2000
B16F10 ATCC	chr7	55815101	.	G	A	NON_SYNONYMOUS_CODING	MODERATE	MISSENSE	Ggc/Agc	G577S	c.1729G>A	Tubgcp5	ENSMUST00000032627	13	0.2121
B16F10 ATCC	chr7	45521986	.	A	C	NON_SYNONYMOUS_CODING	MODERATE	MISSENSE	aAg/aCg	K509T	c.1526A>C	Tulp2	ENSMUST00000024233	12	0.4259
B16F10 ATCC	chr2	119809467	.	T	G	NON_SYNONYMOUS_CODING	MODERATE	MISSENSE	aTt/aGt	I381S	c.1142T>G	Tyro3	ENSMUST00000028763	9	0.4118
B16F10 ATCC	chrX	20668846	.	C	T	SPLICE_SITE_REGION+INTRON	LOW				c.177-3C>T	Uba1	ENSMUST00000001989	3	0.4200
B16F10 ATCC	chr5	86160274	.	T	A	SPLICE_SITE_REGION+INTRON	LOW				c.353+5A>T	Uba6	ENSMUST00000039373	5	0.3661
B16F10 ATCC	chr3	88568211	.	T	C	NON_SYNONYMOUS_CODING	MODERATE	MISSENSE	cTc/cCc	L590P	c.1769T>C	Ubqln4	ENSMUST00000008748	11	0.2766
B16F10 ATCC	chr7	104149993	.	A	G	NON_SYNONYMOUS_CODING	MODERATE	MISSENSE	gTc/gCc	V99A	c.296T>C	Ubqlnl	ENSMUST00000059121	1	0.1625
B16F10 ATCC	chr2	69922367	.	A	G	NON_SYNONYMOUS_CODING	MODERATE	MISSENSE	Act/Gct	T322A	c.964A>G	Ubr3	ENSMUST00000112251	4	0.2316
B16F10 ATCC	chr8	45995666	.	A	C	SPLICE_SITE_REGION+INTRON	LOW				c.1299+4A>C	Ufsp2	ENSMUST00000034051	11	0.3400
B16F10 ATCC	chr1	36174191	.	A	C	NON_SYNONYMOUS_CODING	MODERATE	MISSENSE	tTt/tGt	F861C	c.2582T>G	Uggt1	ENSMUST00000046875	24	0.1444
B16F10 ATCC	chr1	88055842	.	T	C	NON_SYNONYMOUS_CODING	MODERATE	MISSENSE	Ttt/Ctt	F121L	c.361T>C	Ugt1a10	ENSMUST00000113142	1	0.2255
B16F10 ATCC	chr1	88139236	.	C	T	NON_SYNONYMOUS_CODING	MODERATE	MISSENSE	Cgg/Tgg	R255W	c.763C>T	Ugt1a6a	ENSMUST00000014263	1	0.2194
B16F10 ATCC	chr16	33966825	.	CCTGA	C	FRAME_SHIFT+SPLICE_SITE_REGION	HIGH		agtcag/	S51fs	c.153_156delTCAG	Umps	ENSMUST00000023510	1	0.2632
B16F10 ATCC	chr8	71651182	.	C	T	NON_SYNONYMOUS_CODING	MODERATE	MISSENSE	Gag/Aag	E869K	c.2605G>A	Unc13a	ENSMUST00000177517	21	0.2636
B16F10 ATCC	chr1	37432675	.	A	C	SPLICE_SITE_REGION+INTRON	LOW				c.401+4A>C	Unc50	ENSMUST00000027285	3	0.1280
B16F10 ATCC	chr3	141733900	.	T	G	NON_SYNONYMOUS_CODING	MODERATE	MISSENSE	Tta/Gta	L185V	c.553T>G	Unc5c	ENSMUST00000075282	4	0.1742
B16F10 ATCC	chr12	103021012	.	C	A	NON_SYNONYMOUS_CODING	MODERATE	MISSENSE	Cat/Aat	H187N	c.559C>A	Unc79	ENSMUST00000179002	6	0.2245
B16F10 ATCC	chr1	66646451	.	C	G	NON_SYNONYMOUS_CODING	MODERATE	MISSENSE	Ccg/Gcg	P2245A	c.6733C>G	Unc80	ENSMUST00000061620	44	0.1585
B16F10 ATCC	chr16	90781597	.	T	A	NON_SYNONYMOUS_CODING	MODERATE	MISSENSE	gAg/gTg	E723V	c.2168A>T	Urb1	ENSMUST00000140920	17	0.1818
B16F10 ATCC	chr7	46209026	.	T	A	NON_SYNONYMOUS_CODING	MODERATE	MISSENSE	Acc/Tcc	T613S	c.1837A>T	Ush1c	ENSMUST00000009667	18	0.1622
B16F10 ATCC	chr1	188911983	.	T	C	NON_SYNONYMOUS_CODING	MODERATE	MISSENSE	cTt/cCt	L4514P	c.13541T>C	Ush2a	ENSMUST00000060479	62	0.2407
B16F10 ATCC	chr7	104841129	.	G	A	NON_SYNONYMOUS_CODING	MODERATE	MISSENSE	cCc/cTc	P197L	c.590C>T	Usp17lb	ENSMUST00000076501	2	0.5303
B16F10 ATCC	chr6	121268685	.	A	C	SPLICE_SITE_REGION+INTRON	LOW				c.1011+8A>C	Usp18	ENSMUST00000032198	9	0.1847
B16F10 ATCC	chr11	67856040	.	C	A	NON_SYNONYMOUS_CODING	MODERATE	MISSENSE	cGc/cTc	R947L	c.2840G>T	Usp43	ENSMUST00000021288	15	0.1169
B16F10 ATCC	chr6	57158981	.	T	G	NON_SYNONYMOUS_CODING	MODERATE	MISSENSE	cTt/cGt	L21R	c.62T>G	Vmn1r12	ENSMUST00000073384	1	0.2902
B16F10 ATCC	chr7	23928482	.	A	G	NON_SYNONYMOUS_CODING	MODERATE	MISSENSE	Atc/Gtc	I33V	c.97A>G	Vmn1r179	ENSMUST00000049819	1	0.2068
B16F10 ATCC	chr13	22088280	.	T	C	NON_SYNONYMOUS_CODING	MODERATE	MISSENSE	Tgg/Cgg	W135R	c.403T>C	Vmn1r188	ENSMUST00000091739	1	0.3374
B16F10 ATCC	chr13	22883762	.	A	C	NON_SYNONYMOUS_CODING	MODERATE	MISSENSE	Ttt/Gtt	F134V	c.400T>G	Vmn1r212	ENSMUST00000095960	1	0.3457
B16F10 ATCC	chr17	20815065	.	C	A	NON_SYNONYMOUS_CODING	MODERATE	MISSENSE	Ctg/Atg	L191M	c.571C>A	Vmn1r229	ENSMUST00000076759	1	0.1982
B16F10 ATCC	chr17	20913838	.	C	A	NON_SYNONYMOUS_CODING	MODERATE	MISSENSE	Gtc/Ttc	V167F	c.499G>T	Vmn1r232	ENSMUST00000077001	1	0.2347
B16F10 ATCC	chr6	58307678	.	T	G	NON_SYNONYMOUS_CODING	MODERATE	MISSENSE	Ttc/Gtc	F128V	c.382T>G	Vmn1r29	ENSMUST00000168416	1	0.1548
B16F10 ATCC	chr6	56957065	.	G	A	NON_SYNONYMOUS_CODING	MODERATE	MISSENSE	Gtg/Atg	V185M	c.553G>A	Vmn1r4	ENSMUST00000096612	1	0.2634
B16F10 ATCC	chr6	89976741	.	A	G	NON_SYNONYMOUS_CODING	MODERATE	MISSENSE	Agg/Ggg	R191G	c.571A>G	Vmn1r46	ENSMUST00000075797	1	0.2914
B16F10 ATCC	chr6	90223655	.	T	C	NON_SYNONYMOUS_CODING	MODERATE	MISSENSE	aAa/aGa	K229R	c.686A>G	Vmn1r53	ENSMUST00000076086	1	0.1551
B16F10 ATCC	chr7	11670173	.	T	G	NON_SYNONYMOUS_CODING	MODERATE	MISSENSE	aAc/aCc	N116T	c.347A>C	Vmn1r72	ENSMUST00000053134	1	0.2509
B16F10 ATCC	chr7	12152714	.	A	C	NON_SYNONYMOUS_CODING	MODERATE	MISSENSE	aAa/aCa	K84T	c.251A>C	Vmn1r78	ENSMUST00000078039	1	0.2457
B16F10 ATCC	chr6	57036542	.	A	G	NON_SYNONYMOUS_CODING	MODERATE	MISSENSE	Act/Gct	T193A	c.577A>G	Vmn1r8	ENSMUST00000078186	1	0.1606
B16F10 ATCC	chr17	19588975	.	C	A	NON_SYNONYMOUS_CODING	MODERATE	MISSENSE	gCt/gAt	A122D	c.365C>A	Vmn2r101	ENSMUST00000171914	2	0.2472
B16F10 ATCC	chr17	19795047	.	C	A	NON_SYNONYMOUS_CODING	MODERATE	MISSENSE	tCt/tAt	S483Y	c.1448C>A	Vmn2r103	ENSMUST00000172203	4	0.2602
B16F10 ATCC	chr17	20471113	.	C	T	NON_SYNONYMOUS_CODING	MODERATE	MISSENSE	Gtg/Atg	V383M	c.1147G>A	Vmn2r108	ENSMUST00000167314	3	0.2465
B16F10 ATCC	chr17	20583680	.	T	G	NON_SYNONYMOUS_CODING	MODERATE	MISSENSE	cAt/cCt	H211P	c.632A>C	Vmn2r110	ENSMUST00000169559	3	0.2520
B16F10 ATCC	chr17	22605078	.	C	G	NON_SYNONYMOUS_CODING	MODERATE	MISSENSE	tCt/tGt	S438C	c.1313C>G	Vmn2r112	ENSMUST00000097381	4	0.5538
B16F10 ATCC	chr5	109092780	.	G	T	NON_SYNONYMOUS_CODING	MODERATE	MISSENSE	Cat/Aat	H156N	c.466C>A	Vmn2r12	ENSMUST00000095922	2	0.4359
B16F10 ATCC	chr5	109340515	.	A	C	NON_SYNONYMOUS_CODING	MODERATE	MISSENSE	cAg/cCg	Q418P	c.1253A>C	Vmn2r16	ENSMUST00000165180	3	0.2901
B16F10 ATCC	chr5	109363913	.	TA	T	FRAME_SHIFT	HIGH		gta/	V662fs	c.1986delA	Vmn2r16	ENSMUST00000165180	6	0.3340
B16F10 ATCC	chr6	123308339	.	T	G	NON_SYNONYMOUS_CODING	MODERATE	MISSENSE	Tta/Gta	L3V	c.7T>G	Vmn2r19	ENSMUST00000073948	1	0.1459
B16F10 ATCC	chr6	123309918	.	C	A	NON_SYNONYMOUS_CODING	MODERATE	MISSENSE	cCa/cAa	P170Q	c.509C>A	Vmn2r19	ENSMUST00000073948	2	0.1526
B16F10 ATCC	chr6	123336278	.	T	C	NON_SYNONYMOUS_CODING	MODERATE	MISSENSE	cTt/cCt	L769P	c.2306T>C	Vmn2r19	ENSMUST00000073948	6	0.1766
B16F10 ATCC	chr6	123741852	.	TC	T	FRAME_SHIFT	HIGH		cct/	P723fs	c.2168delC	Vmn2r23	ENSMUST00000172391	6	0.1758
B16F10 ATCC	chr6	123742108	.	A	C	NON_SYNONYMOUS_CODING	MODERATE	MISSENSE	Acc/Ccc	T807P	c.2419A>C	Vmn2r23	ENSMUST00000172391	6	0.2977
B16F10 ATCC	chr6	123804196	.	A	C	NON_SYNONYMOUS_CODING	MODERATE	MISSENSE	Agc/Cgc	S454R	c.1360A>C	Vmn2r24	ENSMUST00000075095	4	0.3466
B16F10 ATCC	chr7	5480666	.	T	G	NON_SYNONYMOUS_CODING	MODERATE	MISSENSE	aAa/aCa	K845T	c.2534A>C	Vmn2r28	ENSMUST00000086297	6	0.2455
B16F10 ATCC	chr7	8471485	.	T	A	NON_SYNONYMOUS_CODING	MODERATE	MISSENSE	gAa/gTa	E848V	c.2543A>T	Vmn2r45	ENSMUST00000164845	6	0.3935
B16F10 ATCC	chr3	64509542	.	T	G	NON_SYNONYMOUS_CODING	MODERATE	MISSENSE	aAc/aCc	N65T	c.194A>C	Vmn2r5	ENSMUST00000177184	1	0.3035
B16F10 ATCC	chr7	10037500	.	G	C	NON_SYNONYMOUS_CODING	MODERATE	MISSENSE	aCa/aGa	T774R	c.2321C>G	Vmn2r50	ENSMUST00000074943	6	0.4593
B16F10 ATCC	chr7	10040352	.	C	CA	FRAME_SHIFT	HIGH		tgc/tTgc	C539fs	c.1615dupT	Vmn2r50	ENSMUST00000074943	5	0.1892
B16F10 ATCC	chr7	10046159	.	G	T	NON_SYNONYMOUS_CODING	MODERATE	MISSENSE	Ctt/Att	L448I	c.1342C>A	Vmn2r50	ENSMUST00000074943	4	0.4432
B16F10 ATCC	chr7	12671196	.	A	C	SPLICE_SITE_REGION+INTRON	LOW				c.286-7T>G	Vmn2r55	ENSMUST00000172743	1	0.2019
B16F10 ATCC	chr7	42012414	.	G	T	NON_SYNONYMOUS_CODING	MODERATE	MISSENSE	gCa/gAa	A659E	c.1976C>A	Vmn2r59	ENSMUST00000168489	6	0.2322
B16F10 ATCC	chr3	64537592	.	C	T	NON_SYNONYMOUS_CODING	MODERATE	MISSENSE	aGc/aAc	S904N	c.2711G>A	Vmn2r6	ENSMUST00000176481	6	0.1927
B16F10 ATCC	chr7	42275495	.	C	T	NON_SYNONYMOUS_CODING	MODERATE	MISSENSE	gCt/gTt	A491V	c.1472C>T	Vmn2r61	ENSMUST00000166131	4	0.2150
B16F10 ATCC	chr7	42299964	.	A	G	NON_SYNONYMOUS_CODING	MODERATE	MISSENSE	Aca/Gca	T603A	c.1807A>G	Vmn2r61	ENSMUST00000166131	6	0.2538
B16F10 ATCC	chr7	42928559	.	G	A	NON_SYNONYMOUS_CODING	MODERATE	MISSENSE	aCt/aTt	T185I	c.554C>T	Vmn2r63	ENSMUST00000163803	3	0.4900
B16F10 ATCC	chr7	84943265	.	C	A	SPLICE_SITE_ACCEPTOR+INTRON	HIGH				c.1495-1G>T	Vmn2r65	ENSMUST00000044583	4	0.3333
B16F10 ATCC	chr7	85564760	.	A	C	NON_SYNONYMOUS_CODING	MODERATE	MISSENSE	Tta/Gta	L395V	c.1183T>G	Vmn2r70	ENSMUST00000168230	3	0.2407
B16F10 ATCC	chr7	87002341	.	T	G	NON_SYNONYMOUS_CODING	MODERATE	MISSENSE	tTt/tGt	F316C	c.947T>G	Vmn2r79	ENSMUST00000164462	3	0.2206
B16F10 ATCC	chr5	108801998	.	A	C	NON_SYNONYMOUS_CODING	MODERATE	MISSENSE	Ttt/Gtt	F328V	c.982T>G	Vmn2r8	ENSMUST00000172140	3	0.3342
B16F10 ATCC	chr10	79356622	.	T	G	NON_SYNONYMOUS_CODING	MODERATE	MISSENSE	tTt/tGt	F11C	c.32T>G	Vmn2r82	ENSMUST00000170596	1	0.3090
B16F10 ATCC	chr10	130472314	.	C	A	NON_SYNONYMOUS_CODING	MODERATE	MISSENSE	aGg/aTg	R685M	c.2054G>T	Vmn2r87	ENSMUST00000164227	6	0.7939
B16F10 ATCC	chr14	51455981	.	T	A	NON_SYNONYMOUS_CODING	MODERATE	MISSENSE	Tct/Act	S263T	c.787T>A	Vmn2r89	ENSMUST00000159611	3	0.2468
B16F10 ATCC	chr17	17733617	.	C	A	NON_SYNONYMOUS_CODING	MODERATE	MISSENSE	gCa/gAa	A681E	c.2042C>A	Vmn2r90	ENSMUST00000169805	6	0.2219
B16F10 ATCC	chr17	18326403	.	A	C	NON_SYNONYMOUS_CODING	MODERATE	MISSENSE	Aaa/Caa	K846Q	c.2536A>C	Vmn2r93	ENSMUST00000079206	6	0.3113
B16F10 ATCC	chr17	18440401	.	C	A	NON_SYNONYMOUS_CODING	MODERATE	MISSENSE	ttC/ttA	F358L	c.1074C>A	Vmn2r95	ENSMUST00000166327	3	0.2118
B16F10 ATCC	chr17	18597366	.	T	A	NON_SYNONYMOUS_CODING	MODERATE	MISSENSE	Tta/Ata	L402I	c.1204T>A	Vmn2r96	ENSMUST00000165692	5	0.2289
B16F10 ATCC	chr17	19379301	.	C	A	NON_SYNONYMOUS_CODING	MODERATE	MISSENSE	Caa/Aaa	Q416K	c.1246C>A	Vmn2r99	ENSMUST00000176107	3	0.2412
B16F10 ATCC	chr17	19393818	.	T	A	NON_SYNONYMOUS_CODING	MODERATE	MISSENSE	gTt/gAt	V600D	c.1799T>A	Vmn2r99	ENSMUST00000176107	6	0.2162
B16F10 ATCC	chr11	70513817	.	T	A	NON_SYNONYMOUS_CODING	MODERATE	MISSENSE	ttA/ttT	L119F	c.357A>T	Vmo1	ENSMUST00000021179	3	0.3415
B16F10 ATCC	chr9	67913975	.	T	C	NON_SYNONYMOUS_CODING	MODERATE	MISSENSE	Tcc/Ccc	S1256P	c.3766T>C	Vps13c	ENSMUST00000077879	35	0.4681
B16F10 ATCC	chr11	16257899	.	G	A	START_GAINED	LOW				c.-109G>A	Vstm2a	ENSMUST00000109647	1	0.4894
[truncated: 15,978 more rows]

## Sheet: arrayCGH_copy_number
Gene_Symbol_Final	name_Final	Chr_Final	Start_Final	End_Final	CT26_CNVfinal	B16F0_ATCC_CNVfinal	B16F0_ECAC_CNVfinal	B16F10_ATCC_CNVfinal	B16F10_NCI_CNVfinal	EL4_CNVfinal	Hepa1.6_CNVfinal	ID8_CNVfinal	LL2_CNVfinal	MC38_CNVfinal	P815_CNVfinal	PAN02_CNVfinal	Renca_CNVfinal	TRAMPC1_CNVfinal	TRAMPC2_CNVfinal	X4T1_CNVfinal	Old_GeneSymbol	Old_GeneName
0610007P14Rik	RIKEN cDNA 0610007P14 gene	12	85815448	85824550	0	0	0	0	0	0	0	0	0	0	0	0	0	0	0	0	0610007P14Rik	RIKEN cDNA 0610007P14 gene
0610009B22Rik	RIKEN cDNA 0610009B22 gene	11	51685386	51688874	0	3.877	2.924	1	2.798	0	0	1	0	3.038	0	1	0	0	0	2.185	0610009B22Rik	RIKEN cDNA 0610009B22 gene
0610009O20Rik	RIKEN cDNA 0610009O20 gene	18	38250249	38262629	0	0	0	0	0	0	0	0	0	0	0	0	0	0	0	0	0610009O20Rik	RIKEN cDNA 0610009O20 gene
0610010F05Rik	RIKEN cDNA 0610010F05 gene	11	23564961	23633631	0	0	0	0	0	0	0	0	0	0	0	0	0	0	0	0	0610010F05Rik	RIKEN cDNA 0610010F05 gene
0610010K14Rik	RIKEN cDNA 0610010K14 gene	11	70235206	70237914	0	0	0	0	0	0	0	0	0	0	0	0	0	0	0	0	0610010K14Rik	RIKEN cDNA 0610010K14 gene
0610011F06Rik	RIKEN cDNA 0610011F06 gene	17	25875464	25886007	0	0	0	0	0	0	0	0	1	1	0	0	0	0	0	0	0610011F06Rik	RIKEN cDNA 0610011F06 gene
0610037L13Rik	RIKEN cDNA 0610037L13 gene	4	107889813	107899384	0	0	0	0	0	0	0	0	0	1	0	0	0	0	0	0	0610037L13Rik	RIKEN cDNA 0610037L13 gene
0610040J01Rik	RIKEN cDNA 0610040J01 gene	5	63812363	63899625	0	0	0	0	0	0	0	0	0	0	0	0	0	0	0	0	0610040J01Rik	RIKEN cDNA 0610040J01 gene
1110001J03Rik	RIKEN cDNA 1110001J03 gene	6	38533502	38539449	0	2.429	1	2.078	2.648	0	0	0	2.351	0	1	0	0	0	0	0	1110001J03Rik	RIKEN cDNA 1110001J03 gene
1110004E09Rik	RIKEN cDNA 1110004E09 gene	16	90925809	90934927	0	0	0	0	0	0	0	0	0	0	0	0	1	0	0	0	1110004E09Rik	RIKEN cDNA 1110004E09 gene
1110004F10Rik	RIKEN cDNA 1110004F10 gene	7	116093301	116105210	0	0	0	0	0	0	0	0	0	0	0	0	0	0	0	0	1110004F10Rik	RIKEN cDNA 1110004F10 gene
1110007C09Rik	RIKEN cDNA 1110007C09 gene	13	49202951	49216026	0	0	0	0	0	0	0	0	0	0	0	0	0	0	0	0	1110007C09Rik	RIKEN cDNA 1110007C09 gene
1110008F13Rik	RIKEN cDNA 1110008F13 gene	2	156863128	156873563	0	0	0	0	0	0	0	0	0	0	0	0	1	0	0	0	1110008F13Rik	RIKEN cDNA 1110008F13 gene
1110008P14Rik	RIKEN cDNA 1110008P14 gene	2	32377097	32381938	1	0	0	0	0	0	0	0	1	0	0	0	0	0	0	0	1110008P14Rik	RIKEN cDNA 1110008P14 gene
1110017D15Rik	RIKEN cDNA 1110017D15 gene	4	41505009	41517333	0	0	0	0	0	0	0	0	0	0	0	0	0	0	0	0	1110017D15Rik	RIKEN cDNA 1110017D15 gene
1110032A03Rik	RIKEN cDNA 1110032A03 gene	9	50762828	50775520	0	0	0	0	0	0	0	0	0	0	0	0	0	0	0	0	1110032A03Rik	RIKEN cDNA 1110032A03 gene
1110038F14Rik	RIKEN cDNA 1110038F14 gene	15	76948539	76950729	1	0	0	0	0	0	0	1	2.155	0	0	0	1.972	1	1	0	1110038F14Rik	RIKEN cDNA 1110038F14 gene
1110051M20Rik	RIKEN cDNA 1110051M20 gene	2	91275068	91444704	0	0	0	0	0	0	0	0	0	0	0	0	0	0	0	0	1110051M20Rik	RIKEN cDNA 1110051M20 gene
1110059E24Rik	RIKEN cDNA 1110059E24 gene	19	21581202	21652976	0	0	0	0	0	0	0	0	0	0	0	0	0	0	0	0	1110059E24Rik	RIKEN cDNA 1110059E24 gene
1110059G10Rik	RIKEN cDNA 1110059G10 gene	9	122945089	122951000	0	0	1	0	2.236	0	0	0	0	0	0	0	0	0	0	2.437	1110059G10Rik	RIKEN cDNA 1110059G10 gene
1190002N15Rik	RIKEN cDNA 1190002N15 gene	9	94517864	94538081	0	0	0	0	0	0	0	0	0	0	0	0	0	0	0	0	1190002N15Rik	RIKEN cDNA 1190002N15 gene
1190005I06Rik	RIKEN cDNA 1190005I06 gene	8	120608602	120647632	0	0	0	0	0	0	0	0	0	1	0	0	0	0	0	0	1190005I06Rik	RIKEN cDNA 1190005I06 gene
1200014J11Rik	RIKEN cDNA 1200014J11 gene	11	73047783	73089317	0	0	0	0	0	0	0	0	0	0	0	0	0	0	0	0	1200014J11Rik	RIKEN cDNA 1200014J11 gene
1300017J02Rik	RIKEN cDNA 1300017J02 gene	9	103250521	103305082	0	0	0	0	0	0	0	0	0	0	0	0	0	0	0	0	1300017J02Rik	RIKEN cDNA 1300017J02 gene
1500015L24Rik	RIKEN cDNA 1500015L24 gene	19	20405288	20422787	0	0	0	0	0	0	0	2.032	0	0	0	0	0	0	0	0	1500015L24Rik	RIKEN cDNA 1500015L24 gene
1500015O10Rik	RIKEN cDNA 1500015O10 gene	1	43730602	43742578	0	0	0	0	0	0	0	0	0	0	0	0	0	0	0	0	1500015O10Rik	RIKEN cDNA 1500015O10 gene
1520401A03Rik	RIKEN cDNA 1520401A03 gene	17	23704488	23722783	0	0	0	0	0	0	0	1	0	0	0	1	0	0	1	0	1520401A03Rik	RIKEN cDNA 1520401A03 gene
1600002H07Rik	RIKEN cDNA 1600002H07 gene	17	24215054	24220851	0	0	0	0	0	0	0	0	1	0	0	0	0	0	1	0	1600002H07Rik	RIKEN cDNA 1600002H07 gene
1600002K03Rik	RIKEN cDNA 1600002K03 gene	10	80172944	80175146	0	0	0	0	0	0	0	0	0	0	0	0	0	0	0	0	1600002K03Rik	RIKEN cDNA 1600002K03 gene
1600012H06Rik	RIKEN cDNA 1600012H06 gene	17	14943184	14959570	0	0	0	0	0	0	0	0	1	0	0	0	0	0	0	0	1600012H06Rik	RIKEN cDNA 1600012H06 gene
1600014C10Rik	RIKEN cDNA 1600014C10 gene	7	38183217	38197568	0	-1	0	0	-1	0	0	-1	-1	-1	-1	0	0	-1	-1	0	1600014C10Rik	RIKEN cDNA 1600014C10 gene
1700001C02Rik	RIKEN cDNA 1700001C02 gene	5	30466047	30484088	0	0	0	0	0	0	0	0	0	0	0	0	0	0	0	0	1700001C02Rik	RIKEN cDNA 1700001C02 gene
1700001C19Rik	RIKEN cDNA 1700001C19 gene	17	47412734	47437376	0	0	0	0	0	0	0	0	1	0	0	0	0	0	0	0	1700001C19Rik	RIKEN cDNA 1700001C19 gene
1700001L05Rik	RIKEN cDNA 1700001L05 gene	15	83357526	83367282	0	0	0	0	0	0	0	0	0	0	0	0	1	0	0	0	1700001L05Rik	RIKEN cDNA 1700001L05 gene
1700001O22Rik	RIKEN cDNA 1700001O22 gene	2	30794769	30803661	0	0	0	0	0	0	0	0	0	0	0	0	0	0	0	0	1700001O22Rik	RIKEN cDNA 1700001O22 gene
1700001P01Rik	RIKEN cDNA 1700001P01 gene	11	97771481	97775918	0	0	0	0	0	0	0	0	0	0	0	0	0	0	0	1	1700001P01Rik	RIKEN cDNA 1700001P01 gene
1700003M02Rik	RIKEN cDNA 1700003M02 gene	4	34688559	34730206	0	0	0	0	0	0	0	0	0	0	0	0	0	0	0	0	1700003M02Rik	RIKEN cDNA 1700003M02 gene
1700007G11Rik	RIKEN cDNA 1700007G11 gene	5	98329304	98802047	0	0	0	0	0	0	0	0	0	0	0	0	0	0	0	0	1700007G11Rik	RIKEN cDNA 1700007G11 gene
1700007K09Rik	RIKEN cDNA 1700007K09 gene	7	131325944	131329516	0	0	0	0	0	0	0	0	-1	0	0	0	0	-1	-1	0	1700007K09Rik	RIKEN cDNA 1700007K09 gene
1700007K13Rik	RIKEN cDNA 1700007K13 gene	2	28462001	28466332	1	0	0	0	0	0	1	0	0	0	0	1	0	0	0	0	1700007K13Rik	RIKEN cDNA 1700007K13 gene
1700009J07Rik	RIKEN cDNA 1700009J07 gene	10	77893417	77896114	0	0	0	0	0	0	0	0	0	0	0	0	0	0	0	0	1700009J07Rik	RIKEN cDNA 1700009J07 gene
1700010I14Rik	RIKEN cDNA 1700010I14 gene	17	8988333	9008319	0	0	0	0	0	0	0	0	0	0	0	0	0	0	0	0	1700010I14Rik	RIKEN cDNA 1700010I14 gene
1700011H14Rik	RIKEN cDNA 1700011H14 gene	14	49226358	49245428	0	0	0	0	0	0	0	0	0	0	0	0	0	0	0	0	1700011H14Rik	RIKEN cDNA 1700011H14 gene
1700012A03Rik	RIKEN cDNA 1700012A03 gene	6	32050246	32058921	0	0	1	0	0	0	0	0	0	0	0	0	0	0	0	0	1700012A03Rik	RIKEN cDNA 1700012A03 gene
1700012B09Rik	RIKEN cDNA 1700012B09 gene	9	14756587	14771030	0	0	0	0	0	0	0	0	0	0	0	0	0	0	0	0	1700012B09Rik	RIKEN cDNA 1700012B09 gene
1700013G24Rik	RIKEN cDNA 1700013G24 gene	4	137453284	137455461	0	0	0	0	0	0	0	0	0	0	0	0	0	0	0	0	1700013G24Rik	RIKEN cDNA 1700013G24 gene
1700016C15Rik	RIKEN cDNA 1700016C15 gene	1	177729814	177753324	0	0	0	0	0	0	0	0	0	0	0	0	0	0	0	0	1700016C15Rik	RIKEN cDNA 1700016C15 gene
1700016D06Rik	RIKEN cDNA 1700016D06 gene	8	11654924	11701063	0	0	0	0	0	0	0	0	0	0	0	0	0	0	0	0	1700016D06Rik	RIKEN cDNA 1700016D06 gene
1700016K19Rik	RIKEN cDNA 1700016K19 gene	11	75999912	76003569	0	3.076	1	0	1	1	0	2.131	0	1	0	2.187	0	1	2.825	2.456	1700016K19Rik	RIKEN cDNA 1700016K19 gene
1700017B05Rik	RIKEN cDNA 1700017B05 gene	9	57252322	57262599	0	0	0	0	0	0	0	0	0	0	0	0	0	0	0	0	1700017B05Rik	RIKEN cDNA 1700017B05 gene
1700018B08Rik	RIKEN cDNA 1700018B08 gene	8	121530780	121544320	0	0	0	0	0	0	0	0	0	0	0	0	0	0	0	0	1700018B08Rik	RIKEN cDNA 1700018B08 gene
1700018B24Rik	RIKEN cDNA 1700018B24 gene	3	48605732	48609102	0	0	0	0	0	0	0	0	0	0	0	0	0	0	0	0	1700018B24Rik	RIKEN cDNA 1700018B24 gene
1700018C11Rik	RIKEN cDNA 1700018C11 gene	4	63607089	63622428	0	0	0	0	0	0	0	0	0	0	0	0	0	0	0	0	1700018C11Rik	RIKEN cDNA 1700018C11 gene
1700019D03Rik	RIKEN cDNA 1700019D03 gene	1	52922324	53020179	0	0	0	0	0	0	0	0	0	0	0	0	0	0	0	0	1700019D03Rik	RIKEN cDNA 1700019D03 gene
1700019L03Rik	RIKEN cDNA 1700019L03 gene	2	32777381	32784428	0	0	0	0	0	0	0	0	0	0	0	0	0	0	0	0	1700019L03Rik	RIKEN cDNA 1700019L03 gene
1700019N19Rik	RIKEN cDNA 1700019N19 gene	19	58785803	58794461	0	0	0	0	0	0	0	0	0	-1	0	0	0	0	0	0	1700019N19Rik	RIKEN cDNA 1700019N19 gene
1700020L24Rik	RIKEN cDNA 1700020L24 gene	11	83437677	83441233	0	0	0	0	0	0	0	0	0	0	0	0	0	0	0	0	1700020L24Rik	RIKEN cDNA 1700020L24 gene
1700020N01Rik	RIKEN cDNA 1700020N01 gene	10	21593145	21622376	0	0	0	0	0	0	0	0	0	0	0	0	0	0	0	0	1700020N01Rik	RIKEN cDNA 1700020N01 gene
1700021F05Rik	RIKEN cDNA 1700021F05 gene	10	43525133	43540994	0	0	0	0	0	0	0	0	0	0	-1	0	0	0	0	0	1700021F05Rik	RIKEN cDNA 1700021F05 gene
1700021K19Rik	RIKEN cDNA 1700021K19 gene	16	32821707	32877766	0	0	0	0	0	0	0	0	0	0	0	0	1	0	0	0	1700021K19Rik	RIKEN cDNA 1700021K19 gene
1700022I11Rik	RIKEN cDNA 1700022I11 gene	4	42969604	42983640	0	0	1	0	0	0	0	0	0	0	0	0	0	0	0	0	1700022I11Rik	RIKEN cDNA 1700022I11 gene
1700024G13Rik	RIKEN cDNA 1700024G13 gene	14	32376502	32388373	0	0	0	0	0	0	0	0	0	0	0	0	1	0	0	0	1700024G13Rik	RIKEN cDNA 1700024G13 gene
1700025F22Rik	RIKEN cDNA 1700025F22 gene	19	11139664	11165320	0	0	0	0	0	0	0	0	0	0	0	0	0	0	0	0	1700025F22Rik	RIKEN cDNA 1700025F22 gene
1700025G04Rik	RIKEN cDNA 1700025G04 gene	1	151852403	152090125	0	0	0	0	0	0	0	0	0	0	0	0	0	0	0	0	1700025G04Rik	RIKEN cDNA 1700025G04 gene
1700026D08Rik	RIKEN cDNA 1700026D08 gene	7	83774101	83794880	0	0	0	0	0	0	0	0	0	0	0	0	0	0	0	0	1700026D08Rik	RIKEN cDNA 1700026D08 gene
1700026L06Rik	RIKEN cDNA 1700026L06 gene	2	28692080	28699727	0	0	0	0	0	0	0	0	0	0	0	0	0	0	0	0	1700026L06Rik	RIKEN cDNA 1700026L06 gene
1700028K03Rik	RIKEN cDNA 1700028K03 gene	5	107534709	107551542	0	0	0	0	0	0	0	0	0	0	1	0	0	0	0	0	1700028K03Rik	RIKEN cDNA 1700028K03 gene
1700028P14Rik	RIKEN cDNA 1700028P14 gene	19	23558760	23652812	0	0	0	0	0	0	0	1	0	0	0	0	0	0	0	0	1700028P14Rik	RIKEN cDNA 1700028P14 gene
1700029F12Rik	RIKEN cDNA 1700029F12 gene	13	97021864	97034362	0	0	0	0	0	0	0	0	0	0	0	0	0	0	0	0	1700029F12Rik	RIKEN cDNA 1700029F12 gene
1700029H14Rik	RIKEN cDNA 1700029H14 gene	8	13550733	13562461	0	0	0	0	0	0	0	0	0	0	0	0	0	0	0	1	1700029H14Rik	RIKEN cDNA 1700029H14 gene
1700029I15Rik	RIKEN cDNA 1700029I15 gene	2	92382538	92385708	0	0	0	0	0	0	0	0	0	0	0	0	0	0	0	0	1700029I15Rik	RIKEN cDNA 1700029I15 gene
1700029J07Rik	RIKEN cDNA 1700029J07 gene	8	45953606	45975252	0	0	0	0	0	0	0	0	0	0	0	0	0	0	0	0	1700029J07Rik	RIKEN cDNA 1700029J07 gene
1700029M20Rik	RIKEN cDNA 1700029M20 gene	4	135626655	135630198	0	0	0	0	0	1	0	0	0	0	2.7	0	1	0	0	0	1700029M20Rik	RIKEN cDNA 1700029M20 gene
1700030J22Rik	RIKEN cDNA 1700030J22 gene	8	116969599	116978943	1	0	0	0	0	1	0	0	0	0	0	0	0	0	0	0	1700030J22Rik	RIKEN cDNA 1700030J22 gene
1700030K09Rik	RIKEN cDNA 1700030K09 gene	8	72443880	72461001	0	0	0	0	0	0	0	0	0	0	0	0	0	0	0	0	1700030K09Rik	RIKEN cDNA 1700030K09 gene
1700034E13Rik	RIKEN cDNA 1700034E13 gene	18	52646209	52663733	0	0	0	0	0	0	0	0	0	0	0	0	0	0	0	0	1700034E13Rik	RIKEN cDNA 1700034E13 gene
1700034O15Rik	RIKEN cDNA 1700034O15 gene	6	41684431	41685717	1	2.531	2.6	2.913	3.144	1	0	1	1	0	3.395	0	0	1	0	0	1700034O15Rik	RIKEN cDNA 1700034O15 gene
1700037C18Rik	RIKEN cDNA 1700037C18 gene	16	3895179	3908689	0	0	0	0	0	0	0	0	0	0	0	0	1	0	0	0	1700037C18Rik	RIKEN cDNA 1700037C18 gene
1700037H04Rik	RIKEN cDNA 1700037H04 gene	2	131146324	131160081	0	0	0	0	0	0	0	0	0	0	0	0	0	0	0	0	1700037H04Rik	RIKEN cDNA 1700037H04 gene
1700039E15Rik	RIKEN cDNA 1700039E15 gene	7	45277513	45288998	0	0	0	0	0	0	0	0	0	0	0	0	0	0	0	0	1700039E15Rik	RIKEN cDNA 1700039E15 gene
1700040L02Rik	RIKEN cDNA 1700040L02 gene	10	68430953	68541896	0	0	0	0	0	0	0	0	0	0	0	0	0	0	0	0	1700040L02Rik	RIKEN cDNA 1700040L02 gene
1700041G16Rik	RIKEN cDNA 1700041G16 gene	8	22805766	22809537	0	0	0	0	0	0	0	0	0	1	0	0	0	0	0	0	1700041G16Rik	RIKEN cDNA 1700041G16 gene
1700049G17Rik	RIKEN cDNA 1700049G17 gene	7	27907392	27929460	0	0	0	0	0	0	0	0	0	0	0	0	0	0	0	0	1700049G17Rik	RIKEN cDNA 1700049G17 gene
1700049L16Rik	RIKEN cDNA 1700049L16 gene	10	71979890	71980694	0	0	0	0	0	0	0	0	0	0	0	0	0	0	0	0	1700049L16Rik	RIKEN cDNA 1700049L16 gene
1700057G04Rik	RIKEN cDNA 1700057G04 gene	9	92309377	92357876	0	0	0	0	0	-1	0	0	0	0	0	0	0	0	0	0	1700057G04Rik	RIKEN cDNA 1700057G04 gene
1700061G19Rik	RIKEN cDNA 1700061G19 gene	17	56875477	56888904	0	0	0	0	0	0	0	0	0	0	0	0	0	0	0	0	1700061G19Rik	RIKEN cDNA 1700061G19 gene
1700065D16Rik	RIKEN cDNA 1700065D16 gene	9	95855418	95858322	0	0	0	0	0	0	0	0	0	0	0	0	0	0	0	0	1700065D16Rik	RIKEN cDNA 1700065D16 gene
1700066B19Rik	RIKEN cDNA 1700066B19 gene	18	35703225	35730869	0	0	0	0	0	0	0	0	0	0	0	0	0	0	0	0	1700066B19Rik	RIKEN cDNA 1700066B19 gene
1700067K01Rik	RIKEN cDNA 1700067K01 gene	8	84001502	84004770	0	0	0	0	0	0	0	0	0	0	0	0	0	0	0	0	1700067K01Rik	RIKEN cDNA 1700067K01 gene
1700067P10Rik	RIKEN cDNA 1700067P10 gene	17	48089632	48090920	0	0	0	0	0	0	0	0	0	0	0	0	0	0	0	0	1700067P10Rik	RIKEN cDNA 1700067P10 gene
1700073E17Rik	RIKEN cDNA 1700073E17 gene	6	145387596	145402179	0	0	0	0	0	0	0	0	0	0	0	0	0	0	0	0	1700073E17Rik	RIKEN cDNA 1700073E17 gene
1700074P13Rik	RIKEN cDNA 1700074P13 gene	6	40920437	40940557	0	0	1	1	1	0	0	0	0	0	1	0	0	0	0	0	1700074P13Rik	RIKEN cDNA 1700074P13 gene
1700080E11Rik	RIKEN cDNA 1700080E11 gene	9	105143342	105145092	0	0	0	0	0	0	0	0	0	0	0	0	0	0	0	0	1700080E11Rik	RIKEN cDNA 1700080E11 gene
1700084C01Rik	RIKEN cDNA 1700084C01 gene	1	169928648	169934653	0	0	0	0	0	0	0	0	0	0	0	0	0	0	0	0	1700084C01Rik	RIKEN cDNA 1700084C01 gene
1700088E04Rik	RIKEN cDNA 1700088E04 gene	15	79129349	79141253	1	1	0	1	1	0	0	2.103	2.705	0	0	1	2.178	0	0	3.538	1700088E04Rik	RIKEN cDNA 1700088E04 gene
1700093K21Rik	RIKEN cDNA 1700093K21 gene	11	23516203	23521155	0	0	0	0	0	0	0	0	0	0	0	0	0	0	0	0	1700093K21Rik	RIKEN cDNA 1700093K21 gene
1700101G07Rik	RIKEN cDNA 1700101G07 gene	2	169582068	169583227	0	0	0	0	0	-1	0	0	0	0	0	0	0	0	0	0	1700101G07Rik	RIKEN cDNA 1700101G07 gene
1700102P08Rik	RIKEN cDNA 1700102P08 gene	9	108392805	108410934	0	0	0	0	0	0	0	0	0	0	0	0	0	0	0	1	1700102P08Rik	RIKEN cDNA 1700102P08 gene
1700123K08Rik	RIKEN cDNA 1700123K08 gene	5	138561840	138564712	1	0	0	0	0	1	0	2.055	0	1	3.923	0	0	0	0	0	1700123K08Rik	RIKEN cDNA 1700123K08 gene
1700123O20Rik	RIKEN cDNA 1700123O20 gene	14	54686171	54690742	0	0	0	0	0	0	0	0	0	0	0	0	0	0	0	0	1700123O20Rik	RIKEN cDNA 1700123O20 gene
1700128F08Rik	RIKEN cDNA 1700128F08 gene	9	8221889	8241987	0	0	0	0	0	0	0	0	0	0	0	0	0	1	3.76	0	1700128F08Rik	RIKEN cDNA 1700128F08 gene
1700129C05Rik	RIKEN cDNA 1700129C05 gene	14	59133040	59142893	0	0	0	0	0	0	0	0	0	0	0	0	0	0	0	0	1700129C05Rik	RIKEN cDNA 1700129C05 gene
1810009J06Rik	RIKEN cDNA 1810009J06 gene	6	40964754	40968435	0	0	1	1	1	0	0	0	0	0	0	0	0	0	0	0	1810009J06Rik	RIKEN cDNA 1810009J06 gene
1810011O10Rik	RIKEN cDNA 1810011O10 gene	8	24437180	24438984	0	0	0	0	0	0	0	0	0	0	0	0	0	1	1	1	1810011O10Rik	RIKEN cDNA 1810011O10 gene
1810026J23Rik	RIKEN cDNA 1810026J23 gene	9	21592722	21595970	0	0	0	0	0	0	0	0	0	0	0	0	0	0	0	0	1810026J23Rik	RIKEN cDNA 1810026J23 gene
1810037I17Rik	RIKEN cDNA 1810037I17 gene	3	122924203	122926184	0	0	0	0	0	0	0	0	0	0	0	0	0	0	0	0	1810037I17Rik	RIKEN cDNA 1810037I17 gene
1810043G02Rik	RIKEN cDNA 1810043G02 gene	10	77978524	77986905	0	0	0	0	0	0	0	0	0	0	0	0	0	0	0	0	1810043G02Rik	RIKEN cDNA 1810043G02 gene
1810055G02Rik	RIKEN cDNA 1810055G02 gene	19	3708333	3717881	0	0	0	0	0	0	0	0	0	0	0	0	0	0	0	0	1810055G02Rik	RIKEN cDNA 1810055G02 gene
1810064F22Rik	RIKEN cDNA 1810064F22 gene	9	22196963	22213860	0	0	0	0	0	0	0	0	0	-1	0	0	0	0	0	0	1810064F22Rik	RIKEN cDNA 1810064F22 gene
1810065E05Rik	RIKEN cDNA 1810065E05 gene	11	58421111	58426024	0	0	1	0	0	0	0	0	0	0	0	0	0	0	0	0	1810065E05Rik	RIKEN cDNA 1810065E05 gene
2010003K11Rik	RIKEN cDNA 2010003K11 gene	19	4496790	4498583	0	0	0	0	0	0	0	1	0	0	0	0	0	0	0	0	2010003K11Rik	RIKEN cDNA 2010003K11 gene
2010005H15Rik	RIKEN cDNA 2010005H15 gene	16	36221468	36257444	0	0	0	0	0	0	0	0	0	0	0	0	1	0	0	0	2010005H15Rik	RIKEN cDNA 2010005H15 gene
2010016I18Rik	RIKEN cDNA 2010016I18 gene	3	106481982	106485913	1.975	0	0	0	0	1	0	0	0	0	2.799	1	0	0	0	0	2010016I18Rik	RIKEN cDNA 2010016I18 gene
2010107E04Rik	RIKEN cDNA 2010107E04 gene	12	111961376	111966977	0	0	0	0	0	0	0	0	0	0	0	0	0	0	0	0	2010107E04Rik	RIKEN cDNA 2010107E04 gene
2010107G12Rik	RIKEN cDNA 2010107G12 gene	6	34945278	34988404	0	0	1	1	1	0	0	0	0	0	0	0	0	0	0	0	Gm468	gene model 468, (NCBI)
2010107G23Rik	RIKEN cDNA 2010107G23 gene	10	62107655	62143920	0	0	0	0	0	0	0	0	0	0	0	0	0	0	0	0	2010107G23Rik	RIKEN cDNA 2010107G23 gene
2010109I03Rik	RIKEN cDNA 2010109I03 gene	15	74876987	74897021	0	0	0	0	0	0	0	0	0	0	0	0	0	0	0	0	2010109I03Rik	RIKEN cDNA 2010109I03 gene
2010111I01Rik	RIKEN cDNA 2010111I01 gene	13	63282142	63326096	0	0	0	0	0	0	0	0	0	0	0	0	0	0	0	0	2010111I01Rik	RIKEN cDNA 2010111I01 gene
2200002J24Rik	RIKEN cDNA 2200002J24 gene	7	30699783	30700380	0	0	0	0	0	0	0	0	0	0	-1	0	-1	-1	-1	-1	2200002J24Rik	RIKEN cDNA 2200002J24 gene
2210010C04Rik	RIKEN cDNA 2210010C04 gene	6	41030268	41035509	2.397	4.275	2.74	4.845	4.353	1	0	1	0	0	4.759	0	0	1	1	0	2210010C04Rik	RIKEN cDNA 2210010C04 gene
2210016L21Rik	RIKEN cDNA 2210016L21 gene	5	114942158	114949783	1	0	0	0	0	1	0	1	0	2.878	0	0	0	0	0	0	2210016L21Rik	RIKEN cDNA 2210016L21 gene
2210407C18Rik	RIKEN cDNA 2210407C18 gene	11	58608204	58616075	0	0	1	0	0	0	0	0	0	0	0	0	0	0	0	0	2210407C18Rik	RIKEN cDNA 2210407C18 gene
2300002M23Rik	RIKEN cDNA 2300002M23 gene	17	35567450	35568952	0	0	0	0	0	0	0	0	0	0	0	0	0	0	1	0	2300002M23Rik	RIKEN cDNA 2300002M23 gene
2310002L09Rik	RIKEN cDNA 2310002L09 gene	4	73939371	73950846	0	0	0	0	0	0	0	0	0	0	0	0	0	0	0	0	2310002L09Rik	RIKEN cDNA 2310002L09 gene
2310007B03Rik	RIKEN cDNA 2310007B03 gene	1	93151349	93160948	0	0	0	0	0	0	0	0	0	0	0	0	0	0	0	0	2310007B03Rik	RIKEN cDNA 2310007B03 gene
2310011J03Rik	RIKEN cDNA 2310011J03 gene	10	80318254	80320537	0	0	0	0	0	1	0	0	0	0	0	1	1	0	0	0	2310011J03Rik	RIKEN cDNA 2310011J03 gene
2310022A10Rik	RIKEN cDNA 2310022A10 gene	7	27553233	27582099	0	0	0	0	0	0	0	0	0	0	0	0	0	0	0	0	2310022A10Rik	RIKEN cDNA 2310022A10 gene
2310022B05Rik	RIKEN cDNA 2310022B05 gene	8	124635766	124663369	0	0	0	0	0	0	0	0	0	1	0	0	0	0	0	0	2310022B05Rik	RIKEN cDNA 2310022B05 gene
2310030G06Rik	RIKEN cDNA 2310030G06 gene	9	50739691	50746521	0	0	0	0	0	0	0	0	0	0	0	0	0	0	0	0	2310030G06Rik	RIKEN cDNA 2310030G06 gene
2310033P09Rik	RIKEN cDNA 2310033P09 gene	11	59208321	59210738	0	0	0	0	0	0	0	0	0	0	0	0	0	0	0	0	2310033P09Rik	RIKEN cDNA 2310033P09 gene
2310034C09Rik	RIKEN cDNA 2310034C09 gene	16	88758847	88759792	0	0	0	0	0	0	0	0	0	0	0	0	0	0	0	0	2310034C09Rik	RIKEN cDNA 2310034C09 gene
2310035C23Rik	RIKEN cDNA 2310035C23 gene	1	105663861	105755191	0	0	0	0	0	0	0	0	0	0	1	0	0	0	0	0	2310035C23Rik	RIKEN cDNA 2310035C23 gene
2310036O22Rik	RIKEN cDNA 2310036O22 gene	8	85026833	85030285	0	0	0	0	0	0	0	0	0	0	0	0	0	0	0	1	2310036O22Rik	RIKEN cDNA 2310036O22 gene
2310039H08Rik	RIKEN cDNA 2310039H08 gene	17	46772635	46773407	0	0	0	0	0	0	0	0	0	0	0	0	0	0	0	0	2310039H08Rik	RIKEN cDNA 2310039H08 gene
2310057J18Rik	RIKEN cDNA 2310057J18 gene	10	28972288	28986303	0	0	0	0	0	0	0	0	0	0	0	0	0	0	0	0	2310057J18Rik	RIKEN cDNA 2310057J18 gene
2310057M21Rik	RIKEN cDNA 2310057M21 gene	7	131342718	131362698	0	0	0	0	0	0	0	0	0	0	0	0	0	-1	-1	0	2310057M21Rik	RIKEN cDNA 2310057M21 gene
2310057N15Rik	RIKEN cDNA 2310057N15 gene	16	88773179	88774206	0	0	0	0	0	0	0	0	0	0	0	0	1	0	0	0	2310057N15Rik	RIKEN cDNA 2310057N15 gene
2310067B10Rik	RIKEN cDNA 2310067B10 gene	11	115765433	115799366	0	0	0	0	0	0	0	0	0	1	0	1	0	0	1	0	2310067B10Rik	RIKEN cDNA 2310067B10 gene
2410002F23Rik	RIKEN cDNA 2410002F23 gene	7	44246722	44252319	0	0	0	0	0	0	0	0	0	0	0	0	0	0	0	0	2410002F23Rik	RIKEN cDNA 2410002F23 gene
2410004B18Rik	RIKEN cDNA 2410004B18 gene	3	145938014	145944829	0	0	0	0	0	1	1	0	0	0	0	1	0	0	1	2.035	2410004B18Rik	RIKEN cDNA 2410004B18 gene
2410015M20Rik	RIKEN cDNA 2410015M20 gene	17	56607452	56609771	0	0	0	0	0	0	0	0	0	0	0	0	0	0	0	0	2410015M20Rik	RIKEN cDNA 2410015M20 gene
2410137M14Rik	RIKEN cDNA 2410137M14 gene	17	36977701	36981237	0	0	0	0	0	0	0	0	0	0	0	0	0	0	0	0	2410137M14Rik	RIKEN cDNA 2410137M14 gene
2510009E07Rik	RIKEN cDNA 2510009E07 gene	16	21649045	21694665	0	0	0	0	0	0	0	0	0	0	0	0	1	0	0	0	2510009E07Rik	RIKEN cDNA 2510009E07 gene
2510039O18Rik	RIKEN cDNA 2510039O18 gene	4	147940895	147947314	0	0	0	0	0	0	0	0	0	0	0	0	0	0	0	0	2510039O18Rik	RIKEN cDNA 2510039O18 gene
2610001J05Rik	RIKEN cDNA 2610001J05 gene	6	13867735	13871518	0	0	1	2.113	1	0	0	0	0	0	0	0	0	0	0	0	2610001J05Rik	RIKEN cDNA 2610001J05 gene
2610008E11Rik	RIKEN cDNA 2610008E11 gene	10	79064374	79097600	0	0	0	0	0	0	0	0	0	0	0	0	0	0	0	0	2610008E11Rik	RIKEN cDNA 2610008E11 gene
2610020H08Rik	RIKEN cDNA 2610020H08 gene	7	119794006	119848943	0	0	0	0	0	0	0	0	0	0	0	0	0	0	0	0	2610020H08Rik	RIKEN cDNA 2610020H08 gene
2610028H24Rik	RIKEN cDNA 2610028H24 gene	10	76449081	76461110	0	0	0	0	0	0	0	0	0	0	0	0	0	0	0	0	2610028H24Rik	RIKEN cDNA 2610028H24 gene
2610042L04Rik	RIKEN cDNA 2610042L04 gene	14	4334763	4354688	0	0	0	0	0	0	0	0	0	0	0	0	1	2.074	1	0	2610042L04Rik	RIKEN cDNA 2610042L04 gene
2610203C20Rik	RIKEN cDNA 2610203C20 gene	9	41376397	41617772	0	0	0	0	0	0	0	0	0	0	0	0	0	0	0	4.464	2610203C20Rik	RIKEN cDNA 2610203C20 gene
2610301B20Rik	RIKEN cDNA 2610301B20 gene	4	10874525	10899425	0	0	0	0	0	0	0	0	0	0	0	0	0	0	0	0	2610301B20Rik	RIKEN cDNA 2610301B20 gene
2610318N02Rik	RIKEN cDNA 2610318N02 gene	16	17113399	17125106	0	0	0	0	0	0	0	0	0	0	0	0	1	0	0	0	2610318N02Rik	RIKEN cDNA 2610318N02 gene
2610507B11Rik	RIKEN cDNA 2610507B11 gene	11	78261752	78290623	0	0	0	0	0	0	0	0	0	0	0	0	0	0	0	0	2610507B11Rik	RIKEN cDNA 2610507B11 gene
2610528J11Rik	RIKEN cDNA 2610528J11 gene	4	118526999	118530228	0	-1	0	0	0	0	0	0	-1	0	0	0	0	0	0	0	2610528J11Rik	RIKEN cDNA 2610528J11 gene
2700060E02Rik	RIKEN cDNA 2700060E02 gene	14	19811402	19823823	0	0	0	0	0	0	0	0	0	0	0	0	1	0	0	0	2700060E02Rik	RIKEN cDNA 2700060E02 gene
2700062C07Rik	RIKEN cDNA 2700062C07 gene	18	24470871	24477767	0	0	0	0	0	0	0	0	0	0	0	0	0	0	0	0	2700062C07Rik	RIKEN cDNA 2700062C07 gene
2700081O15Rik	RIKEN cDNA 2700081O15 gene	19	7417625	7425904	0	0	0	0	0	0	0	1	0	0	0	0	0	1	0	0	2700081O15Rik	RIKEN cDNA 2700081O15 gene
2700097O09Rik	RIKEN cDNA 2700097O09 gene	12	55045661	55080110	0	0	0	0	0	0	0	0	0	0	0	0	0	0	0	0	2700097O09Rik	RIKEN cDNA 2700097O09 gene
2810004N23Rik	RIKEN cDNA 2810004N23 gene	8	124839355	124863029	0	0	0	0	0	0	0	0	0	0	0	0	0	0	0	0	2810004N23Rik	RIKEN cDNA 2810004N23 gene
2810006K23Rik	RIKEN cDNA 2810006K23 gene	5	124328089	124341844	0	0	0	0	0	0	0	0	0	0	0	0	0	0	0	0	2810006K23Rik	RIKEN cDNA 2810006K23 gene
2810021J22Rik	RIKEN cDNA 2810021J22 gene	11	58867216	58883288	0	2.094	1	1	1	0	0	0	0	1	0	1	0	0	0	0	2810021J22Rik	RIKEN cDNA 2810021J22 gene
2810025M15Rik	RIKEN cDNA 2810025M15 gene	1	157412352	157420236	0	0	0	0	0	0	0	0	0	0	0	0	0	0	0	0	2810025M15Rik	RIKEN cDNA 2810025M15 gene
2810032G03Rik	RIKEN cDNA 2810032G03 gene	12	5375870	5416631	0	0	0	1	3.072	0	1	0	0	0	3.158	2.548	0	0	0	0	2810032G03Rik	RIKEN cDNA 2810032G03 gene
2810403A07Rik	RIKEN cDNA 2810403A07 gene	3	88685803	88712924	0	0	0	1	0	0	0	0	0	1	0	0	0	0	0	1	2810403A07Rik	RIKEN cDNA 2810403A07 gene
2810407A14Rik	RIKEN cDNA 2810407A14 gene	16	87784075	87839293	0	0	0	0	0	0	0	0	0	0	0	0	1	1	0	0	2810407A14Rik	RIKEN cDNA 2810407A14 gene
2810408A11Rik	RIKEN cDNA 2810408A11 gene	11	69897352	69900987	0	0	0	0	0	0	0	0	0	0	0	0	0	0	0	0	2810408A11Rik	RIKEN cDNA 2810408A11 gene
2810410L24Rik	RIKEN cDNA 2810410L24 gene	11	120185400	120189852	0	0	1	0	0	0	0	0	0	0	0	0	0	0	0	0	2810410L24Rik	RIKEN cDNA 2810410L24 gene
2810428I15Rik	RIKEN cDNA 2810428I15 gene	8	70504292	70506752	0	0	0	0	0	0	0	0	0	2.33	0	0	1	1	2.551	1	2810428I15Rik	RIKEN cDNA 2810428I15 gene
2810474O19Rik	RIKEN cDNA 2810474O19 gene	6	149309414	149335663	0	1	2.392	1	1	0	0	0	2.804	1	0	0	0	0	0	0	2810474O19Rik	RIKEN cDNA 2810474O19 gene
2900011O08Rik	RIKEN cDNA 2900011O08 gene	16	13986604	14101500	0	0	0	0	0	0	0	0	0	0	0	0	1	0	0	0	2900011O08Rik	RIKEN cDNA 2900011O08 gene
2900026A02Rik	RIKEN cDNA 2900026A02 gene	5	113086323	113163351	0	0	0	0	0	0	0	0	0	0	0	0	0	0	0	0	2900026A02Rik	RIKEN cDNA 2900026A02 gene
2900092C05Rik	RIKEN cDNA 2900092C05 gene	7	12512517	12556323	0	0	0	0	0	0	0	0	0	0	0	0	0	0	0	0	2900092C05Rik	RIKEN cDNA 2900092C05 gene
3010026O09Rik	RIKEN cDNA 3010026O09 gene	11	50174444	50200115	0	0	0	0	0	0	0	0	0	0	0	0	0	0	0	0	3010026O09Rik	RIKEN cDNA 3010026O09 gene
3110002H16Rik	RIKEN cDNA 3110002H16 gene	18	12168717	12189997	0	0	0	0	0	0	0	0	0	0	0	0	0	0	0	0	3110002H16Rik	RIKEN cDNA 3110002H16 gene
3110009E18Rik	RIKEN cDNA 3110009E18 gene	1	120121187	120188189	0	0	0	0	0	0	0	0	0	0	0	0	0	0	0	0	3110009E18Rik	RIKEN cDNA 3110009E18 gene
3110035E14Rik	RIKEN cDNA 3110035E14 gene	1	9601199	9627143	0	0	0	0	0	0	0	0	0	0	0	0	0	0	0	0	3110035E14Rik	RIKEN cDNA 3110035E14 gene
3110040N11Rik	RIKEN cDNA 3110040N11 gene	7	81782182	81789478	0	0	0	0	0	0	0	0	0	0	0	0	0	0	0	0	3110040N11Rik	RIKEN cDNA 3110040N11 gene
3110057O12Rik	RIKEN cDNA 3110057O12 gene	3	40894249	40937738	0	0	0	0	0	0	0	0	0	0	0	0	0	0	0	0	3110057O12Rik	RIKEN cDNA 3110057O12 gene
3110062M04Rik	RIKEN cDNA 3110062M04 gene	6	34871771	34878060	0	0	1	0	0	0	0	0	0	0	0	0	0	0	0	0	3110062M04Rik	RIKEN cDNA 3110062M04 gene
3110070M22Rik	RIKEN cDNA 3110070M22 gene	13	119487261	119488383	0	0	0	0	0	0	0	0	0	0	0	0	0	0	0	0	3110070M22Rik	RIKEN cDNA 3110070M22 gene
3110082I17Rik	RIKEN cDNA 3110082I17 gene	5	139359739	139460527	0	0	0	0	0	0	0	0	0	1	1	0	0	0	0	0	3110082I17Rik	RIKEN cDNA 3110082I17 gene
3300002I08Rik	RIKEN cDNA 3300002I08 gene	2	150310935	150362765	0	0	0	0	0	0	0	0	0	1	0	0	0	0	0	0	3300002I08Rik	RIKEN cDNA 3300002I08 gene
3632451O06Rik	RIKEN cDNA 3632451O06 gene	14	49681560	49783383	0	0	0	0	0	0	0	0	0	0	0	0	0	0	0	0	3632451O06Rik	RIKEN cDNA 3632451O06 gene
3830406C13Rik	RIKEN cDNA 3830406C13 gene	14	12284209	12303231	0	0	0	0	0	0	0	0	0	0	0	0	1	0	0	0	3830406C13Rik	RIKEN cDNA 3830406C13 gene
4430402I18Rik	RIKEN cDNA 4430402I18 gene	19	28901268	28967800	0	0	0	0	0	0	0	1	0	0	0	0	0	0	0	0	4430402I18Rik	RIKEN cDNA 4430402I18 gene
4631405J19Rik	RIKEN cDNA 4631405J19 gene	2	93027956	93044732	0	0	0	0	0	0	0	0	0	0	0	0	0	0	0	0	4631405J19Rik	RIKEN cDNA 4631405J19 gene
4632404H12Rik	RIKEN cDNA 4632404H12 gene	3	89767511	89773240	0	0	0	0	0	0	0	0	0	0	0	0	0	0	0	1	4632404H12Rik	RIKEN cDNA 4632404H12 gene
4632433K11Rik	RIKEN cDNA 4632433K11 gene	7	5034118	5035246	0	-1	0	0	0	0	0	-1	0	0	0	0	-1	-1	-1	0	4632433K11Rik	RIKEN cDNA 4632433K11 gene
4732465J04Rik	RIKEN cDNA 4732465J04 gene	10	95746077	95797236	0	0	0	0	0	0	0	0	0	0	0	0	0	0	0	0	4732465J04Rik	RIKEN cDNA 4732465J04 gene
4833408A19Rik	RIKEN cDNA 4833408A19 gene	19	3999548	4000541	0	0	0	0	0	0	0	0	0	0	0	0	0	0	0	0	4833408A19Rik	RIKEN cDNA 4833408A19 gene
4833420G17Rik	RIKEN cDNA 4833420G17 gene	13	119462759	119486117	0	0	0	0	1	0	0	0	0	0	0	0	-1	0	0	0	4833420G17Rik	RIKEN cDNA 4833420G17 gene
4833427G06Rik	RIKEN cDNA 4833427G06 gene	9	51081313	51102078	0	0	0	0	0	0	0	0	0	0	0	0	0	0	0	0	4833427G06Rik	RIKEN cDNA 4833427G06 gene
4833439L19Rik	RIKEN cDNA 4833439L19 gene	13	54551218	54565435	0	0	0	0	0	0	0	0	0	0	0	0	0	0	0	0	4833439L19Rik	RIKEN cDNA 4833439L19 gene
4921501E09Rik	RIKEN cDNA 4921501E09 gene	17	33064143	33068058	0	0	0	0	0	0	0	0	0	0	0	1	0	0	0	0	4921501E09Rik	RIKEN cDNA 4921501E09 gene
4921504E06Rik	RIKEN cDNA 4921504E06 gene	2	19462837	19553914	0	0	0	0	0	0	0	0	0	0	0	0	0	0	0	0	4921504E06Rik	RIKEN cDNA 4921504E06 gene
4921506M07Rik	RIKEN cDNA 4921506M07 gene	12	57564115	57622105	0	0	0	0	0	0	0	0	0	0	0	0	0	0	0	0	4921506M07Rik	RIKEN cDNA 4921506M07 gene
4921507P07Rik	RIKEN cDNA 4921507P07 gene	6	50573302	50596632	0	1	1	1	1	0	0	0	0	0	2.664	0	0	0	0	0	4921507P07Rik	RIKEN cDNA 4921507P07 gene
4921511H03Rik	RIKEN cDNA 4921511H03 gene	5	7304119	7311491	1	0	0	0	0	0	0	0	-1	0	0	0	0	0	0	0	4921511H03Rik	RIKEN cDNA 4921511H03 gene
4921517D22Rik	RIKEN cDNA 4921517D22 gene	13	59687402	59694101	1	0	0	0	0	0	0	0	0	0	1	0	0	0	0	0	4921517D22Rik	RIKEN cDNA 4921517D22 gene
4921524J17Rik	RIKEN cDNA 4921524J17 gene	8	85408759	85432841	0	0	0	0	0	0	0	0	0	1	0	0	0	0	0	1	4921524J17Rik	RIKEN cDNA 4921524J17 gene
4921530L21Rik	RIKEN cDNA 4921530L21 gene	14	95881266	95882775	0	0	0	0	0	0	0	0	-1	0	0	0	0	0	0	0	4921530L21Rik	RIKEN cDNA 4921530L21 gene
4921536K21Rik	RIKEN cDNA 4921536K21 gene	11	3886088	3895098	0	0	0	1	1	0	0	0	1	1	0	0	0	0	0	0	4921536K21Rik	RIKEN cDNA 4921536K21 gene
4922502D21Rik	RIKEN cDNA 4922502D21 gene	6	129322165	129331796	0	0	1	1	0	0	0	0	0	0	0	0	0	0	0	0	4922502D21Rik	RIKEN cDNA 4922502D21 gene
4930402H24Rik	RIKEN cDNA 4930402H24 gene	2	130706200	130906406	0	0	0	0	0	0	0	0	0	0	0	0	0	0	0	0	4930402H24Rik	RIKEN cDNA 4930402H24 gene
4930427A07Rik	RIKEN cDNA 4930427A07 gene	12	113156421	113166048	0	0	0	0	0	0	0	0	0	0	0	0	0	0	0	0	4930427A07Rik	RIKEN cDNA 4930427A07 gene
4930430A15Rik	RIKEN cDNA 4930430A15 gene	2	111162061	111229602	0	0	0	0	0	0	0	0	0	0	0	0	0	0	0	0	4930430A15Rik	RIKEN cDNA 4930430A15 gene
4930430F08Rik	RIKEN cDNA 4930430F08 gene	10	100572274	100589259	0	0	0	0	0	0	0	0	0	0	0	0	0	0	0	0	4930430F08Rik	RIKEN cDNA 4930430F08 gene
4930432E11Rik	RIKEN cDNA 4930432E11 gene	7	29558579	29582169	1	0	0	0	0	1	0	0	0	0	0	0	0	0	0	0	4930432E11Rik	RIKEN cDNA 4930432E11 gene
4930432K21Rik	RIKEN cDNA 4930432K21 gene	8	84148025	84172590	0	0	0	0	0	0	0	0	0	0	0	0	0	0	0	0	4930432K21Rik	RIKEN cDNA 4930432K21 gene
4930432M17Rik	RIKEN cDNA 4930432M17 gene	3	121670762	121682982	0	0	0	0	0	0	0	0	0	0	0	0	0	0	0	0	4930432M17Rik	RIKEN cDNA 4930432M17 gene
4930433I11Rik	RIKEN cDNA 4930433I11 gene	7	40987555	40995181	0	0	0	0	0	0	0	0	0	0	0	0	0	-1	-1	0	4930433I11Rik	RIKEN cDNA 4930433I11 gene
4930433N12Rik	RIKEN cDNA 4930433N12 gene	9	3133847	3199799	0	0	0	0	0	0	0	0	0	0	0	0	0	0	0	3.214	4930433N12Rik	RIKEN cDNA 4930433N12 gene
4930447C04Rik		12			0	0	0	0	0	0	0	0	1	0	0	0	0	0	0	0	Six6os1	Six6 opposite strand transcript 1
4930451I11Rik	RIKEN cDNA 4930451I11 gene	7	126830474	126831496	0	0	0	0	0	0	0	0	0	0	0	0	0	0	0	0	4930451I11Rik	RIKEN cDNA 4930451I11 gene
4930452B06Rik	RIKEN cDNA 4930452B06 gene	14	8431192	8666240	0	0	0	0	0	0	0	0	0	0	0	0	1	0	0	0	4930452B06Rik	RIKEN cDNA 4930452B06 gene
4930453N24Rik	RIKEN cDNA 4930453N24 gene	16	64751751	64771161	0	0	0	0	0	0	0	0	0	0	0	0	1	0	0	0	4930453N24Rik	RIKEN cDNA 4930453N24 gene
4930467E23Rik	RIKEN cDNA 4930467E23 gene	8	19729746	19752236	0	0	0	0	0	0	0	0	0	0	0	0	0	0	0	0	4930467E23Rik	RIKEN cDNA 4930467E23 gene
4930470P17Rik	RIKEN cDNA 4930470P17 gene	2	170579418	170602017	0	0	0	0	0	0	0	0	0	1	0	0	0	0	0	0	4930470P17Rik	RIKEN cDNA 4930470P17 gene
4930474N05Rik	RIKEN cDNA 4930474N05 gene	14	36094917	36100114	0	0	-1	-1	-1	0	0	0	0	0	0	0	0	0	0	0	4930474N05Rik	RIKEN cDNA 4930474N05 gene
4930483J18Rik	RIKEN cDNA 4930483J18 gene	15	81190774	81192763	0	0	0	0	0	0	0	0	1	0	0	0	1	0	0	0	4930483J18Rik	RIKEN cDNA 4930483J18 gene
4930486L24Rik	RIKEN cDNA 4930486L24 gene	13	60842621	60864416	0	0	0	0	0	0	0	0	0	0	0	0	0	0	0	0	4930486L24Rik	RIKEN cDNA 4930486L24 gene
4930503B20Rik	RIKEN cDNA 4930503B20 gene	3	146645193	146651317	0	0	0	0	0	0	0	0	0	0	0	0	0	0	0	0	4930503B20Rik	RIKEN cDNA 4930503B20 gene
4930503L19Rik	RIKEN cDNA 4930503L19 gene	18	70453140	70472480	0	0	0	0	0	0	0	0	0	0	0	0	0	0	0	0	4930503L19Rik	RIKEN cDNA 4930503L19 gene
4930504O13Rik	RIKEN cDNA 4930504O13 gene	11	58446149	58452923	0	0	0	0	0	0	0	0	0	0	0	0	0	0	0	0	4930504O13Rik	RIKEN cDNA 4930504O13 gene
4930515G01Rik	RIKEN cDNA 4930515G01 gene	5	114773737	114774983	0	0	0	0	0	0	0	0	0	0	0	0	0	0	0	0	4930515G01Rik	RIKEN cDNA 4930515G01 gene
4930519G04Rik	RIKEN cDNA 4930519G04 gene	5	114853664	114883880	0	0	0	0	0	0	0	0	0	1	0	0	0	0	0	0	4930519G04Rik	RIKEN cDNA 4930519G04 gene
4930522H14Rik	RIKEN cDNA 4930522H14 gene	4	109505337	109531297	0	0	0	0	0	0	0	0	0	0	0	0	0	0	0	0	4930522H14Rik	RIKEN cDNA 4930522H14 gene
4930523C07Rik	RIKEN cDNA 4930523C07 gene	1	160044382	160080208	0	0	0	0	0	0	0	0	0	0	0	0	0	0	0	0	4930523C07Rik	RIKEN cDNA 4930523C07 gene
4930524B15Rik	RIKEN cDNA 4930524B15 gene	11	31965592	31979651	0	0	0	1	0	0	0	1	0	1	0	1	0	0	0	0	4930524B15Rik	RIKEN cDNA 4930524B15 gene
4930538K18Rik	RIKEN cDNA 4930538K18 gene	4	119205107	119218217	0	0	0	0	0	0	0	0	0	0	0	0	0	0	0	0	4930538K18Rik	RIKEN cDNA 4930538K18 gene
4930539E08Rik	RIKEN cDNA 4930539E08 gene	17	28896397	28915324	0	1	1	1	0	0	0	0	0	0	0	0	0	0	0	0	4930539E08Rik	RIKEN cDNA 4930539E08 gene
4930544G11Rik	RIKEN cDNA 4930544G11 gene	6	65952571	65954012	0	0	1	0	1	0	0	0	0	0	0	0	0	0	0	0	4930544G11Rik	RIKEN cDNA 4930544G11 gene
4930544M13Rik	RIKEN cDNA 4930544M13 gene	13	114607237	114697822	0	0	0	0	0	0	0	0	0	0	0	0	0	0	0	0	4930544M13Rik	RIKEN cDNA 4930544M13 gene
4930548H24Rik	RIKEN cDNA 4930548H24 gene	5	31485740	31488476	0	0	0	0	0	1	0	1	0	0	0	0	0	0	0	1	4930548H24Rik	RIKEN cDNA 4930548H24 gene
4930549C01Rik	RIKEN cDNA 4930549C01 gene	4	136610437	136613226	0	0	0	0	0	0	0	0	0	0	0	0	0	0	0	0	4930549C01Rik	RIKEN cDNA 4930549C01 gene
4930550C14Rik	RIKEN cDNA 4930550C14 gene	9	53405286	53432803	0	0	0	0	0	0	0	0	0	0	0	0	0	0	0	0	4930550C14Rik	RIKEN cDNA 4930550C14 gene
4930556L07Rik	RIKEN cDNA 4930556L07 gene	2	151747578	151749978	0	0	0	0	0	0	0	0	0	1	0	0	1	0	0	0	4930556L07Rik	RIKEN cDNA 4930556L07 gene
4930563D23Rik	RIKEN cDNA 4930563D23 gene	16	92318763	92321441	0	0	0	0	0	0	0	0	0	0	0	0	1	0	0	0	4930563D23Rik	RIKEN cDNA 4930563D23 gene
4930563M21Rik	RIKEN cDNA 4930563M21 gene	9	55962589	55980914	0	0	0	0	0	0	0	0	0	0	0	0	0	0	0	0	4930563M21Rik	RIKEN cDNA 4930563M21 gene
4930578I06Rik	RIKEN cDNA 4930578I06 gene	14	63971122	63987780	0	0	0	0	0	0	0	0	0	0	-1	0	0	0	0	0	4930578I06Rik	RIKEN cDNA 4930578I06 gene
4930579K19Rik	RIKEN cDNA 4930579K19 gene	9	98562229	98563611	0	0	0	0	0	0	0	0	0	0	0	0	0	0	0	0	4930579K19Rik	RIKEN cDNA 4930579K19 gene
4930583K01Rik	RIKEN cDNA 4930583K01 gene	7	118243865	118245551	0	0	0	0	0	0	0	0	0	0	0	0	0	-1	0	0	4930583K01Rik	RIKEN cDNA 4930583K01 gene
4930588K23Rik	RIKEN cDNA 4930588K23 gene	16	18591992	18609751	0	0	0	0	0	0	0	0	0	0	0	0	0	0	0	0	4930588K23Rik	RIKEN cDNA 4930588K23 gene
4930590J08Rik	RIKEN cDNA 4930590J08 gene	6	91914759	91950640	0	0	1	1	1	0	0	0	0	0	0	0	0	0	0	0	4930590J08Rik	RIKEN cDNA 4930590J08 gene
4930591A17Rik	RIKEN cDNA 4930591A17 gene	2	179414936	179416882	0	0	0	0	0	0	0	0	0	0	0	0	0	0	0	0	4930591A17Rik	RIKEN cDNA 4930591A17 gene
4930594M22Rik	RIKEN cDNA 4930594M22 gene	14	122913030	122937469	0	0	0	0	0	0	0	0	0	0	0	0	0	0	0	0	4930594M22Rik	RIKEN cDNA 4930594M22 gene
4930596D02Rik	RIKEN cDNA 4930596D02 gene	14	35809488	35811978	0	0	0	0	0	0	0	0	-1	0	0	0	0	0	0	0	4930596D02Rik	RIKEN cDNA 4930596D02 gene
4931406B18Rik	RIKEN cDNA 4931406B18 gene	7	43492044	43505940	0	0	0	0	0	0	0	0	0	0	0	0	0	0	0	0	4931406B18Rik	RIKEN cDNA 4931406B18 gene
4931406C07Rik	RIKEN cDNA 4931406C07 gene	9	15283337	15306448	0	0	0	0	0	0	0	0	0	0	0	0	0	0	0	0	4931406C07Rik	RIKEN cDNA 4931406C07 gene
4931408C20Rik	RIKEN cDNA 4931408C20 gene	1	26681814	26687460	0	0	0	0	0	0	0	0	0	0	0	0	0	0	0	0	4931408C20Rik	RIKEN cDNA 4931408C20 gene
4931409K22Rik	RIKEN cDNA 4931409K22 gene	5	24543432	24556809	0	0	0	0	0	0	0	0	0	0	0	0	0	0	0	0	4931409K22Rik	RIKEN cDNA 4931409K22 gene
4931414P19Rik	RIKEN cDNA 4931414P19 gene	14	54583663	54605908	0	0	0	0	0	0	0	0	0	0	0	0	0	0	0	0	4931414P19Rik	RIKEN cDNA 4931414P19 gene
4931417E11Rik	RIKEN cDNA 4931417E11 gene	6	73468573	73469667	0	0	0	1	0	0	0	0	0	0	0	0	0	0	0	0	4931417E11Rik	RIKEN cDNA 4931417E11 gene
4931422A03Rik	RIKEN cDNA 4931422A03 gene	2	103966943	104028361	0	0	0	0	0	0	0	0	0	0	0	0	0	0	0	0	4931422A03Rik	RIKEN cDNA 4931422A03 gene
4931428F04Rik	RIKEN cDNA 4931428F04 gene	8	105280410	105289528	0	1	0	0	0	0	0	0	0	1	0	0	0	0	1	1	4931428F04Rik	RIKEN cDNA 4931428F04 gene
4931428L18Rik	RIKEN cDNA 4931428L18 gene	1	31135226	31222684	0	0	0	0	0	0	0	0	0	0	0	0	0	0	0	0	4931428L18Rik	RIKEN cDNA 4931428L18 gene
4931429L15Rik	RIKEN cDNA 4931429L15 gene	9	46303361	46319986	0	0	0	0	0	0	0	0	0	0	0	0	0	0	0	0	4931429L15Rik	RIKEN cDNA 4931429L15 gene
4931431C16Rik	RIKEN cDNA 4931431C16 gene	5	35581227	35588763	1	0	0	0	0	0	0	0	0	0	0	0	0	0	0	0	4931431C16Rik	RIKEN cDNA 4931431C16 gene
4931440P22Rik	RIKEN cDNA 4931440P22 gene	3	65507257	65529379	0	0	0	0	0	0	0	0	0	0	0	0	0	0	0	0	4931440P22Rik	RIKEN cDNA 4931440P22 gene
4932411E22Rik	RIKEN cDNA 4932411E22 gene	11	89390223	89418948	0	0	0	0	0	0	0	0	0	0	0	0	0	0	0	0	4932411E22Rik	RIKEN cDNA 4932411E22 gene
4932411K12Rik	RIKEN cDNA 4932411K12 gene	13	101397669	101464159	0	0	0	0	0	0	0	0	0	0	0	0	0	0	0	0	4932411K12Rik	RIKEN cDNA 4932411K12 gene
4932414J04Rik	RIKEN cDNA 4932414J04 gene	11	21494730	21511178	0	0	0	0	0	0	0	0	1	0	0	0	0	0	0	0	4932414J04Rik	RIKEN cDNA 4932414J04 gene
4932414N04Rik	RIKEN cDNA 4932414N04 gene	2	68656486	68748467	0	0	0	0	0	0	0	0	0	0	0	0	0	0	0	0	4932414N04Rik	RIKEN cDNA 4932414N04 gene
4932415M13Rik	RIKEN cDNA 4932415M13 gene	17	53723690	53724383	0	0	0	0	0	0	0	0	0	0	0	0	1	0	0	0	4932415M13Rik	RIKEN cDNA 4932415M13 gene
4932418E24Rik	RIKEN cDNA 4932418E24 gene	2	26271646	26294557	0	0	0	0	0	0	0	0	0	0	0	0	0	0	0	0	4932418E24Rik	RIKEN cDNA 4932418E24 gene
4932438H23Rik	RIKEN cDNA 4932438H23 gene	16	91053935	91095122	0	0	0	0	0	0	0	0	0	0	0	0	1	1	0	0	4932438H23Rik	RIKEN cDNA 4932438H23 gene
4933402J07Rik	RIKEN cDNA 4933402J07 gene	8	87563853	87589424	0	0	0	0	0	0	0	0	0	0	0	0	0	0	0	0	4933402J07Rik	RIKEN cDNA 4933402J07 gene
4933402N03Rik	RIKEN cDNA 4933402N03 gene	7	131137713	131146314	0	0	0	0	0	0	0	0	0	0	0	0	0	0	0	0	4933402N03Rik	RIKEN cDNA 4933402N03 gene
4933402P03Rik	RIKEN cDNA 4933402P03 gene	11	69816566	69818465	0	0	0	0	0	0	0	0	0	0	0	0	0	0	0	0	4933402P03Rik	RIKEN cDNA 4933402P03 gene
4933404G15Rik	RIKEN cDNA 4933404G15 gene	16	16707687	16718121	0	0	0	0	0	0	0	0	0	0	0	0	0	0	0	0	4933404G15Rik	RIKEN cDNA 4933404G15 gene
4933406M09Rik	RIKEN cDNA 4933406M09 gene	1	134385940	134390981	0	0	0	0	0	0	0	0	0	0	0	0	0	0	0	0	4933406M09Rik	RIKEN cDNA 4933406M09 gene
4933407I18Rik	RIKEN cDNA 4933407I18 gene	9			0	0	0	0	0	0	0	0	0	0	0	0	0	0	0	0	4933407I18Rik	RIKEN cDNA 4933407I18 gene
4933408B17Rik	RIKEN cDNA 4933408B17 gene	18	34579846	34597468	0	0	0	0	0	0	0	0	0	0	0	0	0	0	0	0	4933408B17Rik	RIKEN cDNA 4933408B17 gene
4933409G03Rik	RIKEN cDNA 4933409G03 gene	2	68582413	68616387	0	0	0	0	0	0	0	0	0	0	0	0	0	0	0	0	4933409G03Rik	RIKEN cDNA 4933409G03 gene
4933414I15Rik	RIKEN cDNA 4933414I15 gene	11	50940711	50943765	0	2.197	0	1	0	0	0	1	0	1	0	1	0	0	0	1	4933414I15Rik	RIKEN cDNA 4933414I15 gene
4933415F23Rik	RIKEN cDNA 4933415F23 gene	1	23100473	23102253	0	0	0	0	0	0	0	0	0	0	0	0	0	0	0	0	4933415F23Rik	RIKEN cDNA 4933415F23 gene
4933417A18Rik	RIKEN cDNA 4933417A18 gene	13	34924409	34955875	0	0	0	0	0	0	0	0	0	0	0	0	0	0	0	0	4933417A18Rik	RIKEN cDNA 4933417A18 gene
4933421I07Rik	RIKEN cDNA 4933421I07 gene	7	42445462	42448120	1	0	0	0	0	0	0	0	0	0	0	0	0	0	0	0	4933421I07Rik	RIKEN cDNA 4933421I07 gene
4933427D06Rik	RIKEN cDNA 4933427D06 gene	6	89096110	89110030	0	0	1	0	0	0	0	0	0	0	0	0	0	0	0	0	4933427D06Rik	RIKEN cDNA 4933427D06 gene
4933427D14Rik	RIKEN cDNA 4933427D14 gene	11	72153929	72207459	0	0	0	0	0	0	0	0	0	0	0	0	0	0	0	0	4933427D14Rik	RIKEN cDNA 4933427D14 gene
4933427I04Rik	Riken cDNA 4933427I04 gene	4	123859679	123863165	0	0	0	0	0	0	0	0	0	0	0	0	0	0	0	0	4933427I04Rik	Riken cDNA 4933427I04 gene
4933430I17Rik	RIKEN cDNA 4933430I17 gene	4	62525369	62547993	0	0	0	0	0	0	0	0	0	0	0	0	0	0	0	0	4933430I17Rik	RIKEN cDNA 4933430I17 gene
4933434E20Rik	RIKEN cDNA 4933434E20 gene	3	90051636	90063341	0	0	0	0	0	0	0	0	0	0	0	0	0	0	0	0	4933434E20Rik	RIKEN cDNA 4933434E20 gene
4933434M16Rik	RIKEN cDNA 4933434M16 gene	11	112825154	112832469	0	0	0	0	0	0	0	0	0	0	0	0	0	0	0	0	4933434M16Rik	RIKEN cDNA 4933434M16 gene
4933440M02Rik	RIKEN cDNA 4933440M02 gene	7	125331782	125349786	0	0	0	0	0	0	0	0	0	0	0	0	0	0	0	0	4933440M02Rik	RIKEN cDNA 4933440M02 gene
5031414D18Rik	RIKEN cDNA 5031414D18 gene	14	75016027	75052532	0	0	0	0	0	0	0	0	0	0	0	0	0	0	0	0	5031414D18Rik	RIKEN cDNA 5031414D18 gene
5031439G07Rik	RIKEN cDNA 5031439G07 gene	15	84943936	84988551	1	0	0	0	0	0	0	1	0	0	0	0	0	0	1	0	5031439G07Rik	RIKEN cDNA 5031439G07 gene
5330416C01Rik	RIKEN cDNA 5330416C01 gene	13	97733498	97747411	0	0	0	0	0	0	0	0	0	0	0	0	0	0	0	0	5330416C01Rik	RIKEN cDNA 5330416C01 gene
5330417C22Rik	RIKEN cDNA 5330417C22 gene	3	108455694	108536536	0	0	0	0	0	0	0	0	0	0	2.414	0	0	0	0	0	5330417C22Rik	RIKEN cDNA 5330417C22 gene
5330438D12Rik	RIKEN cDNA 5330438D12 gene	10	116581453	116583514	0	0	0	0	0	0	0	0	0	0	0	0	0	0	0	0	5330438D12Rik	RIKEN cDNA 5330438D12 gene
5430416O09Rik	RIKEN cDNA 5430416O09 gene	4	43730034	43734534	0	0	0	0	0	0	0	0	0	0	0	0	0	0	0	0	5430416O09Rik	RIKEN cDNA 5430416O09 gene
5430419D17Rik	RIKEN cDNA 5430419D17 gene	7	131174402	131250945	0	0	0	0	0	0	0	0	0	0	0	0	0	0	0	0	5430419D17Rik	RIKEN cDNA 5430419D17 gene
5730409E04Rik	RIKEN cDNA 5730409E04Rik gene	4	126609818	126614371	0	0	0	0	0	0	0	0	0	0	0	0	0	0	0	0	5730409E04Rik	RIKEN cDNA 5730409E04Rik gene
5730455P16Rik	RIKEN cDNA 5730455P16 gene	11	80360493	80378034	0	0	0	0	0	0	0	0	0	0	0	0	0	0	0	0	5730455P16Rik	RIKEN cDNA 5730455P16 gene
5730508B09Rik	RIKEN cDNA 5730508B09 gene	3	127869058	127896324	0	0	0	0	0	0	0	0	0	0	0	0	0	0	0	0	5730508B09Rik	RIKEN cDNA 5730508B09 gene
5730522E02Rik	RIKEN cDNA 5730522E02 gene	11	25602763	26210763	0	0	0	0	0	0	0	0	0	0	0	0	0	0	0	0	5730522E02Rik	RIKEN cDNA 5730522E02 gene
5730559C18Rik	RIKEN cDNA 5730559C18 gene	1	136213531	136234264	0	0	0	0	0	0	0	0	0	0	0	0	0	0	0	0	5730559C18Rik	RIKEN cDNA 5730559C18 gene
5830411N06Rik	RIKEN cDNA 5830411N06 gene	7	140247301	140299791	0	0	0	0	0	0	0	0	0	0	0	0	0	0	0	0	5830411N06Rik	RIKEN cDNA 5830411N06 gene
5830415F09Rik	RIKEN cDNA 5830415F09 gene	4	46376505	46389437	0	0	0	0	0	0	0	0	0	0	0	0	0	0	0	0	5830415F09Rik	RIKEN cDNA 5830415F09 gene
5930422O12Rik	RIKEN cDNA 5930422O12 gene	8	33428709	33429548	0	0	0	0	0	0	0	0	0	0	0	0	0	2.35	0	0	5930422O12Rik	RIKEN cDNA 5930422O12 gene
6030419C18Rik	RIKEN cDNA 6030419C18 gene	9	58488603	58499742	0	0	0	0	0	0	0	0	0	0	0	0	0	0	0	0	6030419C18Rik	RIKEN cDNA 6030419C18 gene
6030445D17Rik	RIKEN cDNA 6030445D17 gene	4	136462250	136463977	0	0	0	-1	0	0	0	0	0	0	0	0	0	0	0	0	6030445D17Rik	RIKEN cDNA 6030445D17 gene
6030452D12Rik	RIKEN cDNA 6030452D12 gene	8	106500522	106507342	0	2.232	0	0	0	0	0	0	0	0	0	0	0	0	0	1	6030452D12Rik	RIKEN cDNA 6030452D12 gene
6030458C11Rik	RIKEN cDNA 6030458C11 gene	15	12808177	12824657	0	0	0	0	0	1	0	1	0	0	0	0	4.007	0	0	0	6030458C11Rik	RIKEN cDNA 6030458C11 gene
6030469F06Rik	RIKEN cDNA 6030469F06 gene	12	31184623	31185177	0	0	0	0	0	0	0	0	0	0	0	0	0	0	0	0	6030469F06Rik	RIKEN cDNA 6030469F06 gene
6330403K07Rik	RIKEN cDNA 6330403K07 gene	11	71031941	71033513	0	0	0	0	0	0	0	0	0	0	0	0	0	0	0	0	6330403K07Rik	RIKEN cDNA 6330403K07 gene
6330408A02Rik	RIKEN cDNA 6330408A02 gene	7	13258967	13278721	0	0	0	0	0	0	0	0	0	0	0	0	0	0	0	0	6330408A02Rik	RIKEN cDNA 6330408A02 gene
6330416G13Rik	RIKEN cDNA 6330416G13 gene	4	63558781	63586357	0	0	0	0	0	0	0	0	0	0	0	0	0	0	0	0	6330416G13Rik	RIKEN cDNA 6330416G13 gene
6330444E15Rik	RIKEN cDNA 6330444E15 gene	7	NA	NA	1	0	0	0	0	0	0	0	0	0	0	0	0	0	0	0	6330444E15Rik	RIKEN cDNA 6330444E15 gene
6330549D23Rik	RIKEN cDNA 6330549D23 gene	3	96606659	96629820	0	0	0	0	0	0	0	0	0	0	0	0	0	0	0	0	6330549D23Rik	RIKEN cDNA 6330549D23 gene
6430531B16Rik	RIKEN cDNA 6430531B16 gene	7	139972303	139978755	0	0	0	0	0	0	0	0	0	0	0	0	0	0	0	0	6430531B16Rik	RIKEN cDNA 6430531B16 gene
6430548M08Rik	RIKEN cDNA 6430548M08 gene	8	120114152	120165306	1	0	0	0	0	0	0	0	0	1	0	0	0	1	1	1	6430548M08Rik	RIKEN cDNA 6430548M08 gene
6430553K19Rik	RIKEN cDNA 6430553K19 gene	16	48122049	48158498	0	0	0	0	0	0	0	0	0	0	0	0	0	0	0	0	6430553K19Rik	RIKEN cDNA 6430553K19 gene
6430571L13Rik	RIKEN cDNA 6430571L13 gene	9	107340602	107352422	0	0	0	0	0	0	0	0	0	0	0	0	0	0	0	0	6430571L13Rik	RIKEN cDNA 6430571L13 gene
6430573F11Rik	RIKEN cDNA 6430573F11 gene	8	36457548	36514320	0	0	0	0	0	0	0	0	0	1	0	0	0	1	1	0	6430573F11Rik	RIKEN cDNA 6430573F11 gene
6820408C15Rik	RIKEN cDNA 6820408C15 gene	2	152415587	152444330	0	0	0	0	0	0	0	0	1	2.009	0	0	1	0	0	0	6820408C15Rik	RIKEN cDNA 6820408C15 gene
8030411F24Rik	RIKEN cDNA 8030411F24 gene	2	148782009	148785937	1	0	0	0	0	0	0	0	0	2.02	0	0	1	0	0	0	8030411F24Rik	RIKEN cDNA 8030411F24 gene
8030451A03Rik	RIKEN cDNA 8030451A03 gene	4	63979854	64149924	0	0	0	0	0	0	0	0	0	0	0	0	0	0	0	0	8030463A06Rik	RIKEN cDNA 8030463A06 gene
8030462N17Rik	RIKEN cDNA 8030462N17 gene	18	77633281	77714010	0	0	0	0	0	0	0	0	0	0	0	0	0	0	0	0	8030462N17Rik	RIKEN cDNA 8030462N17 gene
8430429K09Rik	RIKEN cDNA 8430429K09 gene	11	3452365	3479831	0	0	0	0	0	0	0	0	0	0	0	0	0	0	0	0	8430429K09Rik	RIKEN cDNA 8430429K09 gene
9030025P20Rik	RIKEN cDNA 9030025P20 gene	17	14978864	14991577	1	0	0	0	0	0	1	1	2.496	2.457	0	2.241	1	0	2.371	2.216	9030025P20Rik	RIKEN cDNA 9030025P20 gene
9030617O03Rik	RIKEN cDNA 9030617O03 gene	12	100779057	100896981	0	0	0	0	0	0	0	0	0	0	0	0	0	0	0	0	9030617O03Rik	RIKEN cDNA 9030617O03 gene
9030619P08Rik	RIKEN cDNA 9030619P08 gene	15	75427606	75431829	2.662	2.175	0	2.18	1	0	1	2.349	2.857	1	0	2.566	1	2.137	2.361	0	9030619P08Rik	RIKEN cDNA 9030619P08 gene
9030624J02Rik	RIKEN cDNA 9030624J02 gene	7	118740226	118842966	0	0	0	0	0	0	0	0	0	0	0	0	0	0	0	0	9030624J02Rik	RIKEN cDNA 9030624J02 gene
9130008F23Rik	RIKEN cDNA 9130008F23 gene	17	40875482	40880558	0	0	0	0	0	0	0	0	0	0	0	0	0	0	0	0	9130008F23Rik	RIKEN cDNA 9130008F23 gene
9130011E15Rik	RIKEN cDNA 9130011E15 gene	19	45818144	45998488	0	0	0	0	0	0	0	2.024	0	0	0	0	0	1	0	0	9130011E15Rik	RIKEN cDNA 9130011E15 gene
9130019O22Rik	RIKEN cDNA 9130019O22 gene	7	127382260	127387166	0	0	0	0	0	0	0	0	0	0	0	0	0	0	0	0	9130019O22Rik	RIKEN cDNA 9130019O22 gene
9130019P16Rik	RIKEN cDNA 9130019P16 gene	6	54269681	54430221	0	1	1	1	1.977	0	0	0	0	0	1	0	0	0	0	0	9130019P16Rik	RIKEN cDNA 9130019P16 gene
9130230L23Rik	RIKEN cDNA 9130230L23 gene	5	65979358	66004285	0	0	0	0	0	0	0	0	0	0	0	0	0	0	0	0	9130230L23Rik	RIKEN cDNA 9130230L23 gene
9130401M01Rik	RIKEN cDNA 9130401M01 gene	15	58022259	58034325	0	0	0	0	0	0	0	0	0	0	0	0	0	0	0	2.35	9130401M01Rik	RIKEN cDNA 9130401M01 gene
9130409I23Rik	RIKEN cDNA 9130409I23 gene	1	181051237	181060667	0	0	0	0	0	0	0	0	0	1	0	0	0	0	0	0	9130409I23Rik	RIKEN cDNA 9130409I23 gene
9230009I02Rik	RIKEN cDNA 9230009I02 gene	11	51085087	51091833	0	0	0	0	0	0	0	0	0	0	0	0	0	0	0	0	9230009I02Rik	RIKEN cDNA 9230009I02 gene
9230019H11Rik	RIKEN cDNA 9230019H11 gene	10	3119841	3129546	0	0	0	0	0	0	0	0	0	0	0	0	0	0	0	0	9230019H11Rik	RIKEN cDNA 9230019H11 gene
9230020A06Rik	RIKEN cDNA 9230020A06 gene	11	71516536	71573183	0	0	0	0	0	0	0	0	0	0	0	0	0	0	0	0	9230020A06Rik	RIKEN cDNA 9230020A06 gene
9230104L09Rik	RIKEN cDNA 9230104L09 gene	2	148846711	148865038	0	0	0	0	0	0	0	0	0	0	0	0	0	0	0	0	9230104L09Rik	RIKEN cDNA 9230104L09 gene
9230106D20Rik	RIKEN cDNA 9230106D20 gene	10	19644750	19660801	0	0	0	0	0	0	0	0	0	0	0	0	0	0	0	0	9230106D20Rik	RIKEN cDNA 9230106D20 gene
9230109A22Rik	RIKEN cDNA 9230109A22 gene	15	25137530	25149159	0	0	0	0	0	0	1	1	0	0	0	0	0	0	0	0	9230109A22Rik	RIKEN cDNA 9230109A22 gene
9230110C19Rik	RIKEN cDNA 9230110C19 gene	9	8021672	8042823	0	0	0	0	0	0	0	0	0	0	0	0	0	1	3.516	0	9230110C19Rik	RIKEN cDNA 9230110C19 gene
9230112E08Rik	RIKEN cDNA 9230112E08 gene	2	180983924	180987275	0	0	0	0	0	0	0	0	0	1	0	0	0	0	0	0	9230112E08Rik	RIKEN cDNA 9230112E08 gene
9330132A10Rik	RIKEN cDNA 9330132A10 gene	18	89293502	89297229	0	0	0	0	0	0	0	0	0	0	0	0	0	0	0	0	9330132A10Rik	RIKEN cDNA 9330132A10 gene
9330154J02Rik	RIKEN cDNA 9330154J02 gene	9	85820241	85844323	0	0	0	0	0	0	0	0	0	0	0	0	0	0	0	0	9330154J02Rik	RIKEN cDNA 9330154J02 gene
9330158H04Rik	RIKEN cDNA 9330158H04 gene	6	36209620	36390191	0	0	1	1	0	0	0	0	0	0	0	0	0	0	0	0	9330158H04Rik	RIKEN cDNA 9330158H04 gene
9330172E22Rik	RIKEN cDNA 9330172E22 gene	14	105227101	105259281	0	0	0	0	0	0	0	0	0	0	0	0	0	0	0	0	9330172E22Rik	RIKEN cDNA 9330172E22 gene
9330182L06Rik	RIKEN cDNA 9330182L06 gene	5	9266118	9481825	1	0	0	0	0	0	0	0	0	0	0	0	0	0	0	0	9330182L06Rik	RIKEN cDNA 9330182L06 gene
9430007A20Rik	RIKEN cDNA 9430007A20 gene	4	144519822	144529353	0	0	0	0	0	0	0	0	0	0	0	0	0	0	0	0	9430007A20Rik	RIKEN cDNA 9430007A20 gene
9430015G10Rik	RIKEN cDNA 9430015G10 gene	4	156109982	156127265	0	0	0	0	0	0	0	0	0	0	0	0	0	0	0	0	9430015G10Rik	RIKEN cDNA 9430015G10 gene
9430077A04Rik	RIKEN cDNA 9430077A04 gene	14			0	0	0	0	0	0	0	0	0	0	0	0	0	0	0	0	9430077A04Rik	RIKEN cDNA 9430077A04 gene
9430078G10Rik	RIKEN cDNA 9430078G10 gene	19	4397713	4399820	0	0	0	0	0	0	0	0	0	0	0	0	0	0	0	0	9430078G10Rik	RIKEN cDNA 9430078G10 gene
9430097D07Rik	RIKEN cDNA 9430097D07 gene	2	32574181	32575606	0	0	0	0	0	0	0	0	0	0	0	0	0	0	0	0	9430097D07Rik	RIKEN cDNA 9430097D07 gene
9530002B09Rik	RIKEN cDNA 9530002B09 gene	4	122689275	122705129	0	0	0	0	0	0	0	0	0	0	0	0	0	0	0	0	9530002B09Rik	RIKEN cDNA 9530002B09 gene
9530003J23Rik	RIKEN cDNA 9530003J23 gene	10	117232237	117238703	0	0	0	0	0	0	0	0	0	0	0	0	0	0	0	0	9530003J23Rik	RIKEN cDNA 9530003J23 gene
9530053A07Rik	RIKEN cDNA 9530053A07 gene	7	28129816	28164795	0	0	0	0	0	0	0	0	0	0	0	0	0	0	0	0	9530053A07Rik	RIKEN cDNA 9530053A07 gene
9530056K15Rik	RIKEN cDNA 9530056K15 gene	5	143397248	143399563	0	0	0	0	0	0	0	0	0	0	1	0	0	0	0	0	9530056K15Rik	RIKEN cDNA 9530056K15 gene
9530068E07Rik	RIKEN cDNA 9530068E07 gene	11	52396428	52408728	0	0	0	0	1	0	0	0	0	0	0	0	0	0	0	0	9530068E07Rik	RIKEN cDNA 9530068E07 gene
9530077C05Rik	RIKEN cDNA 9530077C05 gene	9	22411577	22444677	0	0	0	0	0	0	0	0	0	0	0	0	0	0	0	0	9530077C05Rik	RIKEN cDNA 9530077C05 gene
9530080O11Rik	RIKEN cDNA 9530080O11 gene	4	95959715	95967655	0	0	0	0	0	0	0	0	0	0	0	0	0	0	0	0	9530080O11Rik	RIKEN cDNA 9530080O11 gene
9630013D21Rik	RIKEN cDNA 9630013D21 gene	4	109651529	109657853	0	0	0	0	0	0	0	0	0	2.619	0	0	0	0	0	0	9630013D21Rik	RIKEN cDNA 9630013D21 gene
9630014M24Rik	RIKEN cDNA 9630014M24 gene	18	NA	NA	0	0	0	0	0	0	0	0	0	0	0	0	0	0	0	0	9630014M24Rik	RIKEN cDNA 9630014M24 gene
9630028B13Rik	RIKEN cDNA 9630028B13 gene	1	185429357	185441819	0	0	0	0	0	0	0	0	0	0	0	0	0	0	0	0	9630028B13Rik	RIKEN cDNA 9630028B13 gene
9830107B12Rik	RIKEN cDNA 9830107B12 gene	17	48125605	48146307	0	0	0	0	0	0	0	0	0	0	0	0	0	0	0	0	9830107B12Rik	RIKEN cDNA 9830107B12 gene
9830147E19Rik	RIKEN cDNA 9830147E19 gene	7	42609526	42642588	0	0	0	0	0	0	0	0	0	0	0	0	0	0	0	0	C330019L16Rik	RIKEN cDNA C330019L16 gene
9930012K11Rik	RIKEN cDNA 9930012K11 gene	14	70154405	70159502	0	0	0	0	0	0	0	0	0	0	0	0	0	0	0	0	9930012K11Rik	RIKEN cDNA 9930012K11 gene
9930014A18Rik	RIKEN cDNA 9930014A18 gene	15	60822271	60831793	0	0	0	0	0	0	0	0	0	0	0	0	0	0	0	0	9930014A18Rik	RIKEN cDNA 9930014A18 gene
9930021J03Rik	RIKEN cDNA 9930021J03 gene	19	29714402	29805989	0	0	0	0	0	0	0	2.447	0	0	0	1	0	1	1	1	9930021J03Rik	RIKEN cDNA 9930021J03 gene
9930022D16Rik	RIKEN cDNA 9930022D16 gene	11	109413917	109420405	0	0	0	0	0	0	0	0	0	0	0	0	0	0	0	0	9930022D16Rik	RIKEN cDNA 9930022D16 gene
9930038B18Rik	RIKEN cDNA 9930038B18 gene	12	8873187	8877459	0	0	0	0	0	0	0	0	0	0	0	0	0	0	0	0	9930038B18Rik	RIKEN cDNA 9930038B18 gene
9930104L06Rik	RIKEN cDNA 9930104L06 gene	4	124937048	124944656	0	0	0	0	0	0	0	0	-1	0	0	0	0	0	0	0	9930104L06Rik	RIKEN cDNA 9930104L06 gene
a	nonagouti	2	154791402	155051012	0	0	0	0	0	0	0	0	0	0	0	0	1	0	0	0	a	nonagouti
A130010J15Rik	RIKEN cDNA A130010J15 gene	1	193168046	193177832	0	0	0	0	0	0	0	0	0	0	0	0	0	0	0	0	A130010J15Rik	RIKEN cDNA A130010J15 gene
A130023I24Rik	RIKEN cDNA A130023I24 gene	7	134227474	134230705	0	0	0	0	0	0	0	0	-1	0	0	0	0	0	0	0	A130023I24Rik	RIKEN cDNA A130023I24 gene
A230050P20Rik	RIKEN cDNA A230050P20 gene	9	20868642	20874307	0	0	0	0	0	0	0	0	0	0	0	0	0	0	0	0	A230050P20Rik	RIKEN cDNA A230050P20 gene
A230052G05Rik	RIKEN cDNA A230052G05 gene	8	70863127	70865428	0	0	0	0	0	0	0	0	0	1	0	0	0	0	0	0	A230052G05Rik	RIKEN cDNA A230052G05 gene
A230056P14Rik	RIKEN cDNA A230056P14 gene	7	55962531	55980868	0	0	0	0	0	0	0	0	0	0	0	0	0	-1	-1	0	A230056P14Rik	RIKEN cDNA A230056P14 gene
A230083G16Rik	RIKEN cDNA A230083G16 gene	6	124916863	124925844	0	3.418	2.36	0	2.661	0	0	0	0	1	0	0	0	1	0	0	A230083G16Rik	RIKEN cDNA A230083G16 gene
A2m	alpha-2-macroglobulin	6	121636173	121679237	0	1	2.005	1	1	1	0	0	0	0	0	0	0	0	0	0	A2m	alpha-2-macroglobulin
A330008L17Rik	RIKEN cDNA A330008L17 gene	8	99416642	99733438	0	0	0	0	0	0	0	0	0	0	0	0	0	0	0	0	A330008L17Rik	RIKEN cDNA A330008L17 gene
A330041J22Rik	RIKEN cDNA A330041J22 gene	9	86695460	86701253	0	0	0	0	0	0	0	0	0	0	0	0	0	0	0	0	A330041J22Rik	RIKEN cDNA A330041J22 gene
A330070K13Rik	RIKEN cDNA A330070K13 gene	5	130378778	130384630	0	0	0	0	0	0	0	0	0	0	0	0	0	0	0	0	A330070K13Rik	RIKEN cDNA A330070K13 gene
A3galt2	alpha 1,3-galactosyltransferase 2 (isoglobotriaosylceramide synthase)	4	128755364	128769298	0	0	0	0	0	0	0	0	0	0	0	0	0	0	0	0	A3galt2	alpha 1,3-galactosyltransferase 2 (isoglobotriaosylceramide synthase)
A430005L14Rik	RIKEN cDNA A430005L14 gene	4	153957237	153961925	0	0	0	0	0	0	0	0	0	0	0	0	0	0	0	0	A430005L14Rik	RIKEN cDNA A430005L14 gene
A430010J10Rik	RIKEN cDNA A430010J10 gene	6	67157801	67169010	0	1	1	0	1	0	0	0	1	0	0	0	0	0	0	0	A430010J10Rik	RIKEN cDNA A430010J10 gene
A430033K04Rik	RIKEN cDNA A430033K04 gene	5	138622859	138652414	0	0	0	0	0	1	0	1	0	0	0	0	0	0	0	0	A430033K04Rik	RIKEN cDNA A430033K04 gene
A430057M04Rik	RIKEN cDNA A430057M04 gene	14	21847578	21856926	0	0	0	0	0	0	0	0	0	0	0	0	1	0	0	0	A430057M04Rik	RIKEN cDNA A430057M04 gene
A430060F13Rik	RIKEN cDNA A430060F13 gene	11	94861018	94861759	0	0	0	0	0	0	0	0	0	0	0	0	0	0	0	0	A430060F13Rik	RIKEN cDNA A430060F13 gene
A430072C10Rik	RIKEN cDNA A430072C10 gene	3	131023838	131026369	0	0	0	0	0	0	0	0	0	0	0	0	0	0	0	0	A430072C10Rik	RIKEN cDNA A430072C10 gene
A430078G23Rik	RIKEN cDNA A430078G23 gene	8	3353415	3390295	0	0	0	0	0	0	0	0	0	0	0	0	0	0	0	0	A430078G23Rik	RIKEN cDNA A430078G23 gene
A430093F15Rik	RIKEN cDNA A430093F15 gene	19	10740947	10786043	0	0	0	0	0	0	0	1	0	0	0	0	0	1	0	0	A430093F15Rik	RIKEN cDNA A430093F15 gene
A430105I19Rik	RIKEN cDNA A430105I19 gene	2	118754158	118762661	0	0	0	0	0	0	0	0	0	0	0	0	0	0	0	0	A430105I19Rik	RIKEN cDNA A430105I19 gene
A4galt	alpha 1,4-galactosyltransferase	15	83226726	83251774	0	0	0	0	0	0	0	1	0	0	0	0	1	0	1	0	A4galt	alpha 1,4-galactosyltransferase
A4gnt	alpha-1,4-N-acetylglucosaminyltransferase	9	99612502	99622367	0	0	0	0	0	0	0	0	0	0	0	0	0	0	0	0	A4gnt	alpha-1,4-N-acetylglucosaminyltransferase
A530013C23Rik	RIKEN cDNA A530013C23 gene	2	167691177	167729172	0	0	0	0	0	0	0	0	1	2.482	0	0	1	0	0	0	A530013C23Rik	RIKEN cDNA A530013C23 gene
A530016L24Rik	RIKEN cDNA A530016L24 gene	12	112489448	112499927	0	0	0	0	1	0	0	0	0	0	0	0	0	0	0	0	A530016L24Rik	RIKEN cDNA A530016L24 gene
A530021J07Rik	Riken cDNA A530021J07 gene	7	83148644	83155922	0	0	0	0	0	0	0	0	0	0	0	0	0	0	0	0	A530021J07Rik	Riken cDNA A530021J07 gene
A530053G22Rik	RIKEN cDNA A530053G22 gene	6	60396349	60403698	0	0	1	0	0	0	0	0	0	0	0	0	0	0	0	0	A530053G22Rik	RIKEN cDNA A530053G22 gene
A530064D06Rik	RIKEN cDNA A530064D06 gene	17	48151896	48167257	1	0	0	0	0	0	0	0	0	0	0	0	0	0	1	0	A530064D06Rik	RIKEN cDNA A530064D06 gene
A530095I07Rik	RIKEN cDNA A530095I07 gene	13	69543046	69544023	0	0	1	0	2.185	0	0	0	0	0	0	0	0	0	0	0	A530095I07Rik	RIKEN cDNA A530095I07 gene
A530099J19Rik	RIKEN cDNA A530099J19 gene	13	19727417	19732951	0	0	0	0	0	0	0	0	0	0	0	0	0	0	0	0	A530099J19Rik	RIKEN cDNA A530099J19 gene
A630001O12Rik	RIKEN cDNA A630001O12 gene	8	126848899	126852254	0	0	0	0	0	0	0	0	0	0	0	0	0	0	0	0	A630001O12Rik	RIKEN cDNA A630001O12 gene
A630023P12Rik	RIKEN cDNA A630023P12 gene	5	110514923	110525980	0	0	0	0	0	0	0	0	-1	0	0	0	0	0	0	0	A630023P12Rik	RIKEN cDNA A630023P12 gene
A630052C17Rik	RIKEN cDNA A630052C17 gene	11	29170909	29173558	0	0	0	0	0	0	0	0	0	0	0	0	0	0	0	0	A630052C17Rik	RIKEN cDNA A630052C17 gene
A630091E08Rik	RIKEN cDNA A630091E08 gene	7	98543378	98562988	0	0	0	0	0	0	0	0	0	0	0	0	0	0	0	0	A630091E08Rik	RIKEN cDNA A630091E08 gene
A630095E13Rik	RIKEN cDNA A630095E13 gene	9	36635754	36643376	0	0	0	0	0	0	0	0	0	0	0	0	0	0	0	3.999	A630095E13Rik	RIKEN cDNA A630095E13 gene
A730017C20Rik	RIKEN cDNA A730017C20 gene	18	59062248	59076962	0	0	0	0	0	0	0	0	0	0	0	0	0	0	0	0	A730017C20Rik	RIKEN cDNA A730017C20 gene
A730018C14Rik	RIKEN cDNA A730018C14 gene	12	112413915	112423212	0	0	0	0	0	0	0	0	0	0	0	0	0	0	0	0	A730018C14Rik	RIKEN cDNA A730018C14 gene
A730020M07Rik	RIKEN cDNA A730020M07 gene	3	121634936	121643485	0	0	0	0	0	0	0	0	0	0	0	0	0	0	0	0	A730020M07Rik	RIKEN cDNA A730020M07 gene
A730036I17Rik	RIKEN cDNA A730036I17 gene	2	129218969	129235604	0	0	0	0	0	0	0	0	1	0	0	0	0	0	0	0	A730036I17Rik	RIKEN cDNA A730036I17 gene
A730045E13Rik	RIKEN cDNA A730045E13 gene	8	24173904	24185568	0	0	0	0	0	0	0	0	0	0	0	0	0	0	0	0	A730045E13Rik	RIKEN cDNA A730045E13 gene
A730049H05Rik	RIKEN cDNA A730049H05 gene	6	92816478	92847174	0	1	1	2.398	2.25	0	0	0	0	0	0	0	0	0	0	0	A730049H05Rik	RIKEN cDNA A730049H05 gene
A730085E03Rik	RIKEN cDNA A730085E03 gene	18			0	0	0	0	0	0	0	0	0	0	0	0	0	0	0	0	A730085E03Rik	RIKEN cDNA A730085E03 gene
A730089K16Rik	RIKEN cDNA A730089K16 gene	5	76655929	76658355	0	0	0	0	0	0	0	0	0	0	0	0	0	0	0	0	A730089K16Rik	RIKEN cDNA A730089K16 gene
A830018L16Rik	RIKEN cDNA A830018L16 gene	1	11414105	11975901	0	0	0	0	0	0	0	0	0	0	0	0	0	0	0	0	A830018L16Rik	RIKEN cDNA A830018L16 gene
A830019P07Rik	RIKEN cDNA A830019P07 gene	19	35835221	35924578	0	0	0	0	0	0	1	1	0	0	0	0	0	1	0	0	A830019P07Rik	RIKEN cDNA A830019P07 gene
A830031A19Rik	RIKEN cDNA A830031A19 gene	11	24048955	24075054	0	0	0	0	0	0	0	0	0	0	0	0	0	0	0	0	A830031A19Rik	RIKEN cDNA A830031A19 gene
A830036E02Rik	RIKEN cDNA A830036E02 gene	11	99416956	99425497	0	0	0	0	0	0	0	0	0	0	0	0	0	0	0	0	A830036E02Rik	RIKEN cDNA A830036E02 gene
A830039N20Rik	RIKEN cDNA A830039N20 gene	14	23292291	23293643	0	0	0	0	0	0	0	0	0	0	0	0	0	0	0	0	A830039N20Rik	RIKEN cDNA A830039N20 gene
A930002I21Rik	RIKEN cDNA A930002I21 gene	3	107090880	107098401	1	0	0	0	0	0	0	0	0	0	0	1	0	0	0	0	A930002I21Rik	RIKEN cDNA A930002I21 gene
A930012O16Rik	RIKEN cDNA A930012O16 gene	2	57236227	57238508	0	0	0	0	0	0	0	0	0	0	0	0	0	0	0	0	A930012O16Rik	RIKEN cDNA A930012O16 gene
A930018P22Rik	RIKEN cDNA A930018P22 gene	2	104122769	104124749	0	0	0	0	0	0	0	0	0	0	0	0	0	0	0	0	A930018P22Rik	RIKEN cDNA A930018P22 gene
A930104D05Rik	RIKEN cDNA A930104D05 gene	2	118270233	118276169	0	1	0	0	0	0	0	0	1	0	0	0	0	0	1	0	A930104D05Rik	RIKEN cDNA A930104D05 gene
AA388235	expressed sequence AA388235	17	33981492	33985358	0	0	0	0	0	0	0	0	0	0	0	0	0	0	0	0	AA388235	expressed sequence AA388235
AA415398	expressed sequence AA415398	4	119530308	119539529	0	0	0	-1	0	1	0	0	0	0	0	0	0	0	0	0	AA415398	expressed sequence AA415398
AA467197	expressed sequence AA467197	2	122636986	122641191	0	2.124	0	0	0	0	0	0	1	0	0	0	1	0	1	0	AA467197	expressed sequence AA467197
AA986860	expressed sequence AA986860	1	130731976	130744622	0	1	0	1	1	0	0	0	0	0	2.901	0	0	0	0	0	AA986860	expressed sequence AA986860
Aaas	achalasia, adrenocortical insufficiency, alacrimia	15	102338247	102350759	1	0	0	0	0	1	0	1	0	0	0	0	2.037	0	0	0	Aaas	achalasia, adrenocortical insufficiency, alacrimia
Aacs	acetoacetyl-CoA synthetase	5	125475814	125517410	0	0	0	0	0	0	0	0	0	0	0	0	0	0	0	0	Aacs	acetoacetyl-CoA synthetase
Aadac	arylacetamide deacetylase (esterase)	3	60025717	60040160	0	0	0	0	0	0	0	0	0	0	0	0	0	0	0	0	Aadac	arylacetamide deacetylase (esterase)
Aadat	aminoadipate aminotransferase	8	60506124	60545677	0	0	0	0	0	0	0	0	0	0	0	0	0	0	0	0	Aadat	aminoadipate aminotransferase
Aaed1	AhpC/TSA antioxidant enzyme domain containing 1	13	64291836	64312710	0	0	0	0	0	0	0	0	0	0	0	0	0	0	0	0	1110018J18Rik	RIKEN cDNA 1110018J18 gene
Aagab	alpha- and gamma-adaptin binding protein	9	63602655	63641889	0	0	0	0	0	0	0	0	0	0	0	0	0	0	0	0	2310007F21Rik	RIKEN cDNA 2310007F21 gene
Aak1	AP2 associated kinase 1	6	86849517	86991864	0	0	1	1	1.979	0	0	0	0	0	0	0	0	0	0	0	Aak1	AP2 associated kinase 1
Aamdc	adipogenesis associated Mth938 domain containing	7	97550334	97579497	0	0	0	0	0	0	0	0	0	0	0	0	0	0	0	0	1810020D17Rik	RIKEN cDNA 1810020D17 gene
Aamp	angio-associated migratory protein	1	74279840	74284738	0	0	0	0	0	0	0	0	0	0	1	0	0	0	0	0	Aamp	angio-associated migratory protein
Aanat	arylalkylamine N-acetyltransferase	11	116586432	116597680	0	0	0	0	0	0	0	0	0	0	0	0	0	0	0	0	Aanat	arylalkylamine N-acetyltransferase
Aar2	AAR2 splicing factor homolog (S. cerevisiae)	2	156547584	156568972	0	0	0	0	0	0	0	0	0	0	0	0	0	0	0	0	0610011L14Rik	RIKEN cDNA 0610011L14 gene
Aard	alanine and arginine rich domain containing protein	15	52040107	52045722	1	0	0	0	0	0	0	1	0	0	0	0	0	0	0	0	Aard	alanine and arginine rich domain containing protein
Aars	alanyl-tRNA synthetase	8	111033144	111057664	0	0	0	0	0	1	0	0	0	1	0	0	0	0	0	0	Aars	alanyl-tRNA synthetase
Aars2	alanyl-tRNA synthetase 2, mitochondrial (putative)	17	45506841	45520842	0	0	0	0	0	0	0	0	0	0	0	0	0	0	0	0	Aarsl	alanyl-tRNA synthetase like
Aarsd1	alanyl-tRNA synthetase domain containing 1	11	101406839	101417615	0	0	1	0	0	0	0	0	0	0	0	0	1	0	0	0	Aarsd1	alanyl-tRNA synthetase domain containing 1
Aasdh	aminoadipate-semialdehyde dehydrogenase	5	76873659	76905514	0	0	0	0	0	0	0	0	0	0	2.376	0	0	0	0	0	A230062G08Rik	RIKEN cDNA A230062G08 gene
Aasdhppt	aminoadipate-semialdehyde dehydrogenase-phosphopantetheinyl transferase	9	4294793	4309494	0	0	0	0	0	0	0	0	0	0	0	0	0	0	0	0	Aasdhppt	aminoadipate-semialdehyde dehydrogenase-phosphopantetheinyl transferase
Aass	aminoadipate-semialdehyde synthase	6	23072173	23132986	0	0	1	0	0	0	0	0	0	0	0	0	0	0	0	0	Aass	aminoadipate-semialdehyde synthase
Aatf	apoptosis antagonizing transcription factor	11	84422855	84513522	0	0	0	0	0	0	0	0	0	0	0	0	0	0	0	0	Aatf	apoptosis antagonizing transcription factor
Aatk	apoptosis-associated tyrosine kinase	11	120007313	120047167	0	1	0	0	0	0	0	0	0	0	0	0	0	0	1	0	Aatk	apoptosis-associated tyrosine kinase
AB124611	cDNA sequence AB124611	9	21526176	21545333	0	0	0	0	0	0	0	0	0	0	0	0	0	0	0	0	AB124611	cDNA sequence AB124611
Abat	4-aminobutyrate aminotransferase	16	8513429	8621568	0	0	0	0	0	0	0	0	0	0	0	0	1	0	0	0	Abat	4-aminobutyrate aminotransferase
Abca1	ATP-binding cassette, sub-family A (ABC1), member 1	4	53030787	53159895	0	0	0	0	0	0	0	0	0	0	0	0	0	0	0	0	Abca1	ATP-binding cassette, sub-family A (ABC1), member 1
Abca13	ATP-binding cassette, sub-family A (ABC1), member 13	11	9191942	9684259	0	0	0	0	0	0	0	0	0	0	0	0	0	0	0	0	Abca13	ATP-binding cassette, sub-family A (ABC1), member 13
Abca14	ATP-binding cassette, sub-family A (ABC1), member 14	7	120203961	120325352	0	0	0	0	0	0	0	0	0	0	0	0	0	0	0	0	Abca14	ATP-binding cassette, sub-family A (ABC1), member 14
Abca15	ATP-binding cassette, sub-family A (ABC1), member 15	7	120328684	120407687	0	0	0	0	0	0	0	0	0	0	0	0	0	0	0	0	Abca15	ATP-binding cassette, sub-family A (ABC1), member 15
Abca16	ATP-binding cassette, sub-family A (ABC1), member 16	7	120409647	120544813	0	0	0	0	0	0	0	0	0	0	0	0	0	0	0	0	Abca16	ATP-binding cassette, sub-family A (ABC1), member 16
Abca17	ATP-binding cassette, sub-family A (ABC1), member 17	17	24264259	24351029	0	0	0	0	0	1	1	0	1	0	0	1	0	0	0	0	Abca17	ATP-binding cassette, sub-family A (ABC1), member 17
Abca2	ATP-binding cassette, sub-family A (ABC1), member 2	2	25428703	25448540	0	0	0	0	0	0	0	0	0	0	0	0	0	0	0	0	Abca2	ATP-binding cassette, sub-family A (ABC1), member 2
Abca3	ATP-binding cassette, sub-family A (ABC1), member 3	17	24351950	24410201	0	0	0	0	0	0	0	0	0	0	0	0	0	0	0	0	Abca3	ATP-binding cassette, sub-family A (ABC1), member 3
Abca4	ATP-binding cassette, sub-family A (ABC1), member 4	3	122044443	122180123	1	0	0	0	0	0	0	0	0	0	0	0	0	0	0	0	Abca4	ATP-binding cassette, sub-family A (ABC1), member 4
Abca5	ATP-binding cassette, sub-family A (ABC1), member 5	11	110269369	110337716	0	0	0	0	0	0	0	0	0	0	0	0	0	0	0	0	Abca5	ATP-binding cassette, sub-family A (ABC1), member 5
Abca6	ATP-binding cassette, sub-family A (ABC1), member 6	11	110176820	110251776	0	0	0	0	0	0	0	0	0	0	0	0	0	0	0	0	Abca6	ATP-binding cassette, sub-family A (ABC1), member 6
Abca7	ATP-binding cassette, sub-family A (ABC1), member 7	10	79996494	80015572	0	0	0	0	0	0	0	0	0	0	0	0	0	0	0	0	Abca7	ATP-binding cassette, sub-family A (ABC1), member 7
Abca8a	ATP-binding cassette, sub-family A (ABC1), member 8a	11	110025634	110095978	0	0	0	0	0	0	0	0	0	0	0	0	0	0	0	0	Abca8a	ATP-binding cassette, sub-family A (ABC1), member 8a
Abca8b	ATP-binding cassette, sub-family A (ABC1), member 8b	11	109932190	109995845	0	0	0	0	0	0	0	0	0	0	0	0	0	0	0	0	Abca8b	ATP-binding cassette, sub-family A (ABC1), member 8b
Abca9	ATP-binding cassette, sub-family A (ABC1), member 9	11	110100749	110168196	0	0	0	0	0	0	0	0	0	0	0	0	0	0	0	0	Abca9	ATP-binding cassette transporter sub-family A member 9
Abcb10	ATP-binding cassette, sub-family B (MDR/TAP), member 10	8	123952459	123983122	0	0	0	0	0	0	0	0	0	0	0	0	0	0	0	0	Abcb10	ATP-binding cassette, sub-family B (MDR/TAP), member 10
Abcb11	ATP-binding cassette, sub-family B (MDR/TAP), member 11	2	69238282	69342614	0	0	0	0	0	0	0	0	0	0	0	0	0	0	0	0	Abcb11	ATP-binding cassette, sub-family B (MDR/TAP), member 11
Abcb1a	ATP-binding cassette, sub-family B (MDR/TAP), member 1A	5	8660077	8748575	1	0	0	0	0	0	0	0	0	0	0	0	0	0	0	0	Abcb1a	ATP-binding cassette, sub-family B (MDR/TAP), member 1A
Abcb1b	ATP-binding cassette, sub-family B (MDR/TAP), member 1B	5	8798147	8866315	2.006	0	0	0	0	0	0	0	0	0	0	0	0	0	0	0	Abcb1b	ATP-binding cassette, sub-family B (MDR/TAP), member 1B
Abcb4	ATP-binding cassette, sub-family B (MDR/TAP), member 4	5	8893717	8959231	0	0	0	0	0	0	0	0	0	0	0	0	0	0	0	0	Abcb4	ATP-binding cassette, sub-family B (MDR/TAP), member 4
Abcb6	ATP-binding cassette, sub-family B (MDR/TAP), member 6	1	75171717	75180392	0	0	0	0	0	0	0	0	0	0	1	0	1	0	0	0	Abcb6	ATP-binding cassette, sub-family B (MDR/TAP), member 6
Abcb8	ATP-binding cassette, sub-family B (MDR/TAP), member 8	5	24393663	24410054	0	0	0	0	0	0	0	0	0	0	0	0	0	0	0	0	Abcb8	ATP-binding cassette, sub-family B (MDR/TAP), member 8
Abcb9	ATP-binding cassette, sub-family B (MDR/TAP), member 9	5	124061530	124095798	0	0	0	0	0	0	0	0	0	0	0	0	0	0	0	0	Abcb9	ATP-binding cassette, sub-family B (MDR/TAP), member 9
Abcc1	ATP-binding cassette, sub-family C (CFTR/MRP), member 1	16	14361558	14475737	0	0	0	0	0	0	0	0	0	0	0	0	1	0	0	0	Abcc1	ATP-binding cassette, sub-family C (CFTR/MRP), member 1
Abcc10	ATP-binding cassette, sub-family C (CFTR/MRP), member 10	17	46303221	46328352	0	0	0	0	0	0	0	0	0	0	0	0	0	0	0	0	Abcc10	ATP-binding cassette, sub-family C (CFTR/MRP), member 10
Abcc12	ATP-binding cassette, sub-family C (CFTR/MRP), member 12	8	86482260	86580686	0	0	0	0	0	0	0	0	0	0	0	0	0	0	0	0	Abcc12	ATP-binding cassette, sub-family C (CFTR/MRP), member 12
Abcc2	ATP-binding cassette, sub-family C (CFTR/MRP), member 2	19	43782192	43840740	0	0	0	0	0	0	0	1	0	0	0	0	0	0	0	0	Abcc2	ATP-binding cassette, sub-family C (CFTR/MRP), member 2
Abcc3	ATP-binding cassette, sub-family C (CFTR/MRP), member 3	11	94343298	94392997	0	0	0	0	0	0	0	0	0	0	0	0	0	0	0	0	Abcc3	ATP-binding cassette, sub-family C (CFTR/MRP), member 3
Abcc4	ATP-binding cassette, sub-family C (CFTR/MRP), member 4	14	118482692	118706219	0	0	0	0	0	0	0	0	0	0	0	0	0	0	0	0	Abcc4	ATP-binding cassette, sub-family C (CFTR/MRP), member 4
Abcc5	ATP-binding cassette, sub-family C (CFTR/MRP), member 5	16	20331303	20426394	0	0	0	0	0	0	0	0	0	0	0	0	1	0	0	0	Abcc5	ATP-binding cassette, sub-family C (CFTR/MRP), member 5
Abcc6	ATP-binding cassette, sub-family C (CFTR/MRP), member 6	7	45976380	46030302	0	0	0	0	0	0	0	0	0	0	0	0	0	0	0	0	Abcc6	ATP-binding cassette, sub-family C (CFTR/MRP), member 6
Abcc8	ATP-binding cassette, sub-family C (CFTR/MRP), member 8	7	46104523	46180033	0	0	0	0	0	0	0	0	0	0	0	0	0	0	0	0	Abcc8	ATP-binding cassette, sub-family C (CFTR/MRP), member 8
Abcc9	ATP-binding cassette, sub-family C (CFTR/MRP), member 9	6	142587862	142702274	0	0	1	0	0	0	0	0	0	0	0	0	0	0	0	0	Abcc9	ATP-binding cassette, sub-family C (CFTR/MRP), member 9
Abcd2	ATP-binding cassette, sub-family D (ALD), member 2	15	91145884	91191807	1	0	0	1	0	0	0	1	0	0	0	0	1	0	1	0	Abcd2	ATP-binding cassette, sub-family D (ALD), member 2
Abcd3	ATP-binding cassette, sub-family D (ALD), member 3	3	121758774	121815302	1	0	0	0	0	0	0	0	0	0	0	0	0	0	0	0	Abcd3	ATP-binding cassette, sub-family D (ALD), member 3
Abcd4	ATP-binding cassette, sub-family D (ALD), member 4	12	84602531	84617466	0	0	0	0	0	0	0	0	-1	0	0	0	0	0	0	0	Abcd4	ATP-binding cassette, sub-family D (ALD), member 4
Abce1	ATP-binding cassette, sub-family E (OABP), member 1	8	79683442	79711740	0	0	0	0	0	0	0	0	0	0	0	0	0	0	0	0	Abce1	ATP-binding cassette, sub-family E (OABP), member 1
Abcf2	ATP-binding cassette, sub-family F (GCN20), member 2	5	24565345	24577467	0	0	0	0	0	0	0	1	0	0	0	0	0	0	0	0	Abcf2	ATP-binding cassette, sub-family F (GCN20), member 2
Abcf3	ATP-binding cassette, sub-family F (GCN20), member 3	16	20548577	20561379	0	0	0	0	0	0	0	0	0	0	0	0	1	1	1	0	Abcf3	ATP-binding cassette, sub-family F (GCN20), member 3
Abcg1	ATP-binding cassette, sub-family G (WHITE), member 1	17	31057698	31115777	0	1	2.394	1.994	2.459	0	0	0	0	0	0	0	0	0	0	0	Abcg1	ATP-binding cassette, sub-family G (WHITE), member 1
Abcg2	ATP-binding cassette, sub-family G (WHITE), member 2	6	58584523	58692869	0	0	1	0	0	0	0	0	0	0	0	0	0	0	0	0	Abcg2	ATP-binding cassette, sub-family G (WHITE), member 2
Abcg3	ATP-binding cassette, sub-family G (WHITE), member 3	5	104935057	104982718	0	0	0	0	0	0	0	0	0	0	0	0	0	0	0	0	Abcg3	ATP-binding cassette, sub-family G (WHITE), member 3
Abcg4	ATP-binding cassette, sub-family G (WHITE), member 4	9	44273188	44288615	0	0	0	0	0	0	0	0	0	0	0	0	0	0	0	0	Abcg4	ATP-binding cassette, sub-family G (WHITE), member 4
Abcg5	ATP-binding cassette, sub-family G (WHITE), member 5	17	84658234	84683011	0	0	0	0	0	0	0	0	0	0	0	0	0	0	0	0	Abcg5	ATP-binding cassette, sub-family G (WHITE), member 5
Abcg8	ATP-binding cassette, sub-family G (WHITE), member 8	17	84676302	84700333	0	0	0	0	0	-1	0	0	0	0	0	0	0	0	0	0	Abcg8	ATP-binding cassette, sub-family G (WHITE), member 8
Abhd1	abhydrolase domain containing 1	5	30950066	30955091	0	0	0	0	0	0	0	0	0	0	0	0	0	0	0	0	Abhd1	abhydrolase domain containing 1
Abhd10	abhydrolase domain containing 10	16	45729725	45742955	0	0	0	0	0	0	0	0	0	0	1	0	1	0	0	0	Abhd10	abhydrolase domain containing 10
Abhd11	abhydrolase domain containing 11	5	135009152	135012175	0	0	0	0	0	0	0	1	0	0	0	0	0	0	0	0	Abhd11	abhydrolase domain containing 11
Abhd12	abhydrolase domain containing 12	2	150832493	150904741	0	0	0	0	0	0	0	0	0	1	0	0	0	0	0	0	Abhd12	abhydrolase domain containing 12
Abhd14a	abhydrolase domain containing 14A	9	106440054	106447678	0	0	0	0	0	0	0	0	0	0	0	0	0	0	0	0	Abhd14a	abhydrolase domain containing 14A
Abhd14b	abhydrolase domain containing 14b	9	106447788	106452922	0	0	0	0	0	0	0	0	2.036	0	0	0	0	0	0	0	Abhd14b	abhydrolase domain containing 14b
Abhd15	abhydrolase domain containing 15	11	77515121	77538607	0	0	0	0	0	0	0	0	0	0	0	0	0	0	0	0	1300007F04Rik	RIKEN cDNA 1300007F04 gene
Abhd16a	abhydrolase domain containing 16A	17	35089263	35102987	0	0	0	0	0	0	0	0	0	0	0	0	0	0	0	0	Bat5	HLA-B associated transcript 5
Abhd16b	abhydrolase domain containing 16B	2	181493206	181494980	0	0	0	0	0	0	0	0	0	0	0	0	0	0	0	0	BC050777	cDNA sequence BC050777
Abhd17a	abhydrolase domain containing 17A	10	80583654	80590341	0	0	0	0	0	0	0	0	0	0	0	0	0	0	0	0	D10Bwg1364e	DNA segment, Chr 10, Brigham & Women's Genetics 1364 expressed
Abhd17b	abhydrolase domain containing 17B	19	21653309	21685637	0	0	0	0	0	0	0	0	0	0	0	0	0	0	0	0	5730446C15Rik	RIKEN cDNA 5730446C15 gene
Abhd17c	abhydrolase domain containing 17C	7	84109356	84151893	0	0	0	0	0	0	0	0	0	0	0	0	0	0	0	0	2210412D01Rik	RIKEN cDNA 2210412D01 gene
Abhd2	abhydrolase domain containing 2	7	79273201	79365508	0	0	0	0	0	0	0	0	0	0	0	0	0	0	0	0	Abhd2	abhydrolase domain containing 2
Abhd3	abhydrolase domain containing 3	18	10644411	10706771	0	0	0	0	0	0	0	0	0	0	0	0	0	0	0	0	Abhd3	abhydrolase domain containing 3
Abhd4	abhydrolase domain containing 4	14	54254188	54270637	0	0	0	0	0	0	0	0	0	0	0	0	0	0	0	0	Abhd4	abhydrolase domain containing 4
Abhd5	abhydrolase domain containing 5	9	122351608	122381524	0	0	0	0	0	0	0	0	0	0	0	0	0	0	0	0	Abhd5	abhydrolase domain containing 5
Abhd6	abhydrolase domain containing 6	14	8002902	8056555	0	0	0	0	0	0	0	0	0	0	0	0	1	0	0	0	Abhd6	abhydrolase domain containing 6
Abhd8	abhydrolase domain containing 8	8	71456700	71463657	0	0	0	0	0	0	0	0	0	1	0	0	1	0	0	1	Abhd8	abhydrolase domain containing 8
Abi1	abl-interactor 1	2	22940073	23040241	0	0	0	0	0	-1	0	0	0	0	0	0	0	0	0	0	Abi1	abl-interactor 1
Abi2	abl-interactor 2	1	60409619	60481158	0	0	0	1	0	0	0	0	0	0	1	0	0	0	0	0	Abi2	abl-interactor 2
Abi3	ABI gene family, member 3	11	95830074	95842476	0	0	0	0	0	0	0	0	0	0	0	0	0	0	0	0	Abi3	ABI gene family, member 3
Abi3bp	ABI gene family, member 3 (NESH) binding protein	16	56477846	56690128	0	0	0	0	0	0	0	0	0	0	0	0	1	0	0	0	Abi3bp	ABI gene family, member 3 (NESH) binding protein
Abl1	c-abl oncogene 1, non-receptor tyrosine kinase	2	31688376	31804227	0	0	0	0	0	0	0	0	0	0	0	0	0	0	0	0	Abl1	v-abl Abelson murine leukemia oncogene 1
Abl2	v-abl Abelson murine leukemia viral oncogene 2 (arg, Abelson-related gene)	1	156558786	156649568	0	0	0	0	0	0	0	0	0	0	1	0	0	0	0	0	Abl2	v-abl Abelson murine leukemia viral oncogene 2 (arg, Abelson-related gene)
Ablim1	actin-binding LIM protein 1	19	57032733	57314919	0	0	0	0	0	0	0	1.977	0	0	0	0	0	0	0	0	Ablim1	actin-binding LIM protein 1
Ablim2	actin-binding LIM protein 2	5	35757880	35884973	0	0	0	0	0	0	0	0	0	0	0	0	0	0	0	0	Ablim2	actin-binding LIM protein 2
Ablim3	actin binding LIM protein family, member 3	18	61799395	61911852	0	0	0	0	0	0	0	0	0	0	0	0	0	0	0	0	Ablim3	actin binding LIM protein family, member 3
Abo	ABO blood group (transferase A, alpha 1-3-N-acetylgalactosaminyltransferase, transferase B, alpha 1-3-galactosyltransferase)	2	26842503	26864979	0	0	0	0	0	0	0	0	0	0	0	0	0	0	0	0	Abo	ABO blood group (transferase A, alpha 1-3-N-acetylgalactosaminyltransferase, transferase B, alpha 1-3-galactosyltransferase)
Abr	active BCR-related gene	11	76416734	76622314	0	0	0	0	0	0	0	0	0	0	0	0	0	0	0	0	Abr	active BCR-related gene
Abra	actin-binding Rho activating protein	15	41865293	41869720	1	2.031	0	1	2.105	2.051	1	3.538	0	0	0	3.283	0	1	3.577	2.64	Abra	actin-binding Rho activating protein
Abt1	activator of basal transcription 1	13	23421539	23423866	0	0	0	0	0	0	0	0	0	0	0	0	0	0	0	0	Abt1	activator of basal transcription
Abtb1	ankyrin repeat and BTB (POZ) domain containing 1	6	88835915	88841935	3.311	6.304	3.317	4.883	6.125	1	0	4.071	0	2.827	3.578	0	1	3.247	3.526	0	Abtb1	ankyrin repeat and BTB (POZ) domain containing 1
Abtb2	ankyrin repeat and BTB (POZ) domain containing 2	2	103566310	103718423	0	0	0	0	0	0	0	0	0	0	0	0	0	0	0	0	Abtb2	ankyrin repeat and BTB (POZ) domain containing 2
Acaa1a	acetyl-Coenzyme A acyltransferase 1A	9	119339676	119350299	0	0	1	0	1	0	0	0	0	0	0	0	0	0	0	1	Acaa1a	acetyl-Coenzyme A acyltransferase 1A
Acaa1b	acetyl-Coenzyme A acyltransferase 1B	9	119148023	119157093	0	0	0	0	0	0	0	0	0	0	0	0	0	0	0	0	Acaa1b	acetyl-Coenzyme A acyltransferase 1B
Acaa2	acetyl-Coenzyme A acyltransferase 2 (mitochondrial 3-oxoacyl-Coenzyme A thiolase)	18	74779212	74806207	0	0	0	0	0	0	0	0	0	0	0	0	0	0	0	0	Acaa2	acetyl-Coenzyme A acyltransferase 2 (mitochondrial 3-oxoacyl-Coenzyme A thiolase)
Acaca	acetyl-Coenzyme A carboxylase alpha	11	84129672	84401651	0	0	0	0	0	0	0	0	0	0	0	0	0	0	0	0	Acaca	acetyl-Coenzyme A carboxylase alpha
Acacb	acetyl-Coenzyme A carboxylase beta	5	114146535	114250761	0	0	0	0	0	0	0	0	0	0	0	0	0	0	0	0	Acacb	acetyl-Coenzyme A carboxylase beta
Acad10	acyl-Coenzyme A dehydrogenase family, member 10	5	121621026	121660514	0	0	0	0	0	0	0	0	0	1	0	0	0	0	0	0	Acad10	acyl-Coenzyme A dehydrogenase family, member 10
Acad11	acyl-Coenzyme A dehydrogenase family, member 11	9	104063377	104127656	0	0	0	0	0	0	0	0	0	0	0	0	0	0	0	0	Acad11	acyl-Coenzyme A dehydrogenase family, member 11
Acad8	acyl-Coenzyme A dehydrogenase family, member 8	9	26974135	26999566	0	0	0	0	0	0	0	0	0	0	0	0	0	0	0	0	Acad8	acyl-Coenzyme A dehydrogenase family, member 8
Acad9	acyl-Coenzyme A dehydrogenase family, member 9	3	36065979	36092853	0	0	0	0	0	0	0	0	0	0	0	0	0	0	0	0	Acad9	acyl-Coenzyme A dehydrogenase family, member 9
Acadl	acyl-Coenzyme A dehydrogenase, long-chain	1	66830839	66863277	0	0	0	0	0	0	0	0	0	0	0	0	0	0	0	0	Acadl	acyl-Coenzyme A dehydrogenase, long-chain
Acadm	acyl-Coenzyme A dehydrogenase, medium chain	3	153922357	153944632	0	0	0	0	0	-1	0	0	0	0	0	0	0	0	0	0	Acadm	acyl-Coenzyme A dehydrogenase, medium chain
Acads	acyl-Coenzyme A dehydrogenase, short chain	5	115110299	115119346	0	0	0	0	0	0	0	0	0	1	0	0	0	0	0	0	Acads	acyl-Coenzyme A dehydrogenase, short chain
Acadsb	acyl-Coenzyme A dehydrogenase, short/branched chain	7	131410601	131446211	0	0	0	0	0	0	0	0	0	0	0	0	0	0	0	0	Acadsb	acyl-Coenzyme A dehydrogenase, short/branched chain
Acadvl	acyl-Coenzyme A dehydrogenase, very long chain	11	70010183	70015411	0	1	0	0	0	1	0	1	0	1	0	1	0	1	2.559	1	Acadvl	acyl-Coenzyme A dehydrogenase, very long chain
Acan	aggrecan	7	79053483	79115099	0	0	0	0	0	0	0	0	0	0	0	0	0	0	0	0	Agc1	aggrecan 1
Acap1	ArfGAP with coiled-coil, ankyrin repeat and PH domains 1	11	69881567	69895539	0	0	0	0	0	0	0	0	0	0	0	0	0	0	0	0	Centb1	centaurin, beta 1
Acap2	ArfGAP with coiled-coil, ankyrin repeat and PH domains 2	16	31092413	31201238	0	0	0	0	0	0	0	0	0	1	0	0	1	0	0	0	Centb2	centaurin, beta 2
Acap3	ArfGAP with coiled-coil, ankyrin repeat and PH domains 3	4	155891875	155907251	0	0	0	0	0	0	0	0	0	0	0	0	0	0	0	0	Centb5	centaurin, beta 5
Acat1	acetyl-Coenzyme A acetyltransferase 1	9	53580522	53610382	0	0	0	0	0	0	0	0	0	0	0	0	0	0	0	0	Acat1	acetyl-Coenzyme A acetyltransferase 1
Acat2	acetyl-Coenzyme A acetyltransferase 2	17	12942890	12960747	0	0	0	0	0	0	0	0	0	0	0	0	0	0	0	0	Acat2	acetyl-Coenzyme A acetyltransferase 2
Acat3	acetyl-Coenzyme A acetyltransferase 3	17	12923833	12940402	1	0	0	0	0	0	0	0	1	0	0	0	0	0	0	0	Acat3	acetyl-Coenzyme A acetyltransferase 3
Acbd3	acyl-Coenzyme A binding domain containing 3	1	180726043	180754204	0	0	0	0	0	0	0	0	0	0	0	0	0	0	0	0	Acbd3	acyl-Coenzyme A binding domain containing 3
Acbd4	acyl-Coenzyme A binding domain containing 4	11	103101682	103112200	0	0	0	0	0	0	0	0	0	0	0	0	0	0	0	0	Acbd4	acyl-Coenzyme A binding domain containing 4
Acbd5	acyl-Coenzyme A binding domain containing 5	2	23068168	23114510	0	0	0	0	0	0	0	0	0	0	0	0	0	0	0	0	Acbd5	acyl-Coenzyme A binding domain containing 5
Acbd6	acyl-Coenzyme A binding domain containing 6	1	155558120	155691330	0	0	0	0	0	0	0	0	0	0	0	0	0	0	0	0	Acbd6	acyl-Coenzyme A binding domain containing 6
Accs	1-aminocyclopropane-1-carboxylate synthase (non-functional)	2	93833467	93849943	0	0	0	0	0	0	0	0	0	0	0	0	0	0	0	0	2610203E10Rik	RIKEN cDNA 2610203E10 gene
Accsl	1-aminocyclopropane-1-carboxylate synthase (non-functional)-like	2	93855361	93869157	0	0	0	0	0	0	0	0	0	0	0	0	0	0	0	0	Gm1967	gene model 1967, (NCBI)
Ace	angiotensin I converting enzyme (peptidyl-dipeptidase A) 1	11	105967945	105989964	0	0	0	0	0	0	0	0	0	0	0	0	0	0	0	0	Ace	angiotensin I converting enzyme (peptidyl-dipeptidase A) 1
Acer1	alkaline ceramidase 1	17	56953490	56982126	1	2.008	1	1	1.978	1	1	0	2.063	0	0	1	0	0	1	1	Asah3	N-acylsphingosine amidohydrolase (alkaline ceramidase) 3
Acer2	alkaline ceramidase 2	4	86874396	86934822	0	0	0	0	0	0	0	0	1.997	1	0	0	0	0	0	0	Asah3l	N-acylsphingosine amidohydrolase 3-like
Acer3	alkaline ceramidase 3	7	98213658	98321208	0	0	0	0	0	0	0	0	0	0	0	0	0	0	0	0	Phca	phytoceramidase, alkaline
Ache	acetylcholinesterase	5	137287519	137294466	1	1	0	0	0	0	0	1	0	0	2.688	0	0	0	0	1	Ache	acetylcholinesterase
Acin1	apoptotic chromatin condensation inducer 1	14	54642161	54686931	0	0	0	0	0	0	0	0	0	0	0	0	0	0	0	0	Acin1	apoptotic chromatin condensation inducer 1
Ackr1	atypical chemokine receptor 1 (Duffy blood group)	1	173331886	173333750	0	0	0	0	0	0	0	0	0	0	0	0	0	0	0	0	Darc	Duffy blood group, chemokine receptor
Ackr2	atypical chemokine receptor 2	9	121898464	121911064	0	0	1	0	0	0	0	0	0	0	0	0	0	0	0	1	Ccbp2	chemokine binding protein 2
Ackr3	atypical chemokine receptor 3	1	90203980	90216751	0	0	0	0	0	0	0	0	1	0	0	0	0	0	0	0	Cxcr7	chemokine (C-X-C motif) receptor 7
Acly	ATP citrate lyase	11	100476353	100528000	0	0	0	0	0	0	0	0	0	0	0	0	0	0	0	0	Acly	ATP citrate lyase
Acmsd	amino carboxymuconate semialdehyde decarboxylase	1	127729413	127767978	0	0	0	0	0	0	0	0	0	0	0	0	0	0	0	0	Acmsd	amino carboxymuconate semialdehyde decarboxylase
Acnat2	acyl-coenzyme A amino acid N-acyltransferase 2	4	49379840	49408151	0	0	0	0	0	0	0	0	0	0	0	0	0	0	0	0	C730036D15Rik	RIKEN cDNA C730036D15 gene
Aco1	aconitase 1	4	40143081	40198338	0	0	0	0	0	0	0	0	0	0	0	0	0	0	0	0	Aco1	aconitase 1
Aco2	aconitase 2, mitochondrial	15	81872309	81915133	0	0	0	0	0	0	0	0	0	0	0	0	1	0	0	0	Aco2	aconitase 2, mitochondrial
Acot1	acyl-CoA thioesterase 1	12	84009502	84017670	0	0	0	0	0	0	0	0	0	0	0	0	0	0	0	0	Acot1	acyl-CoA thioesterase 1
Acot11	acyl-CoA thioesterase 11	4	106744555	106804998	0	0	0	0	0	0	0	0	0	1	0	0	0	0	0	0	Acot11	acyl-CoA thioesterase 11
Acot12	acyl-CoA thioesterase 12	13	91741512	91786148	0	0	0	0	0	0	0	0	0	0	0	0	0	0	0	0	Acot12	acyl-CoA thioesterase 12
Acot13	acyl-CoA thioesterase 13	13	24817948	24831517	0	0	0	0	0	0	0	0	0	0	0	0	0	0	0	0	Them2	thioesterase superfamily member 2
Acot2	acyl-CoA thioesterase 2	12	83987861	83993873	0	0	0	0	0	0	0	0	0	0	0	0	0	0	0	0	Acot2	acyl-CoA thioesterase 2
Acot3	acyl-CoA thioesterase 3	12	84052144	84059565	0	0	0	0	0	0	0	0	0	0	0	0	0	0	0	0	Acot3	acyl-CoA thioesterase 3
Acot4	acyl-CoA thioesterase 4	12	84038379	84044723	0	0	0	0	0	0	0	0	0	0	0	0	0	0	0	0	Acot4	acyl-CoA thioesterase 4
Acot5	acyl-CoA thioesterase 5	12	84069325	84076020	0	0	0	0	1	1	1	0	0	0	0	3.394	0	0	0	0	Acot5	acyl-CoA thioesterase 5
Acot6	acyl-CoA thioesterase 6	12	84100654	84111349	0	0	0	0	0	0	0	0	0	0	0	0	0	0	0	0	Acot6	acyl-CoA thioesterase 6
Acot7	acyl-CoA thioesterase 7	4	152178134	152271852	0	0	0	0	0	0	0	0	0	0	0	0	0	0	0	0	Acot7	acyl-CoA thioesterase 7
Acot8	acyl-CoA thioesterase 8	2	164792768	164804882	0	0	0	0	0	0	0	0	0	2.164	0	0	2.019	0	0	0	Acot8	acyl-CoA thioesterase 8
Acox1	acyl-Coenzyme A oxidase 1, palmitoyl	11	116171888	116199045	0	0	0	0	0	0	0	0	0	0	0	0	0	0	0	0	Acox1	acyl-Coenzyme A oxidase 1, palmitoyl
Acox2	acyl-Coenzyme A oxidase 2, branched chain	14	8225511	8259353	0	0	0	0	0	0	0	0	0	0	0	0	0	0	0	0	Acox2	acyl-Coenzyme A oxidase 2, branched chain
Acox3	acyl-Coenzyme A oxidase 3, pristanoyl	5	35583040	35615352	0	0	0	0	0	0	0	0	0	0	0	0	0	0	0	0	Acox3	acyl-Coenzyme A oxidase 3, pristanoyl
Acoxl	acyl-Coenzyme A oxidase-like	2	127838876	128123873	0	0	0	0	0	0	0	0	0	0	0	0	0	0	0	0	Acoxl	acyl-Coenzyme A oxidase-like
Acp1	acid phosphatase 1, soluble	12	30893326	30911612	0	0	0	0	0	0	0	0	0	0	0	0	0	0	0	0	Acp1	acid phosphatase 1, soluble
Acp2	acid phosphatase 2, lysosomal	2	91202885	91214098	0	0	0	0	0	0	0	0	0	0	0	0	0	0	0	0	Acp2	acid phosphatase 2, lysosomal
Acp5	acid phosphatase 5, tartrate resistant	9	22126731	22135746	0	0	0	0	0	0	0	0	0	0	0	0	0	0	0	1	Acp5	acid phosphatase 5, tartrate resistant
Acp6	acid phosphatase 6, lysophosphatidic	3	97158777	97177299	0	0	0	0	0	0	0	0	0	0	1	0	0	0	0	0	Acp6	acid phosphatase 6, lysophosphatidic
Acpp	acid phosphatase, prostate	9	104288316	104337728	0	0	0	0	0	0	0	0	0	0	0	0	0	0	0	0	Acpp	acid phosphatase, prostate
Acr	acrosin prepropeptide	15	89568326	89574585	1	1	0	0	0	0	0	1.984	1	0	0	0	1	1	1	0	Acr	preproacrosin
Acrbp	proacrosin binding protein	6	125049689	125063267	1	3.453	2.774	2.272	2.752	0	0	1	0	1	2.687	0	0	1	1	0	Acrbp	proacrosin binding protein
Acrv1	acrosomal vesicle protein 1	9	36693220	36698843	0	0	0	0	0	0	0	0	0	0	0	0	0	0	0	2.921	Acrv1	acrosomal vesicle protein 1
Acsbg1	acyl-CoA synthetase bubblegum family member 1	9	54604877	54661870	0	0	0	0	0	0	0	0	0	0	0	0	0	0	0	0	Acsbg1	acyl-CoA synthetase bubblegum family member 1
Acsbg2	acyl-CoA synthetase bubblegum family member 2	17	56843103	56874447	0	0	0	0	0	0	0	0	0	0	0	0	0	0	0	0	Acsbg2	acyl-CoA synthetase bubblegum family member 2
Acsf2	acyl-CoA synthetase family member 2	11	94557102	94601871	0	0	0	0	0	0	0	0	0	0	0	0	0	0	0	0	BC018371	cDNA sequence BC018371
Acsl1	acyl-CoA synthetase long-chain family member 1	8	46471041	46536051	0	0	0	0	0	0	0	0	0	0	0	0	0	0	0	0	Acsl1	acyl-CoA synthetase long-chain family member 1
Acsl3	acyl-CoA synthetase long-chain family member 3	1	78657825	78707743	0	0	0	0	0	0	0	0	0	0	0	0	0	0	0	0	Acsl3	acyl-CoA synthetase long-chain family member 3
Acsl5	acyl-CoA synthetase long-chain family member 5	19	55253369	55296627	0	0	0	0	0	0	0	0	0	0	0	0	0	0	0	0	Acsl5	acyl-CoA synthetase long-chain family member 5
Acsl6	acyl-CoA synthetase long-chain family member 6	11	54303798	54364756	0	0	0	0	0	0	0	0	0	0	0	0	0	0	0	0	Acsl6	acyl-CoA synthetase long-chain family member 6
Acsm1	acyl-CoA synthetase medium-chain family member 1	7	119607026	119662515	0	0	0	0	0	0	0	0	0	0	0	0	0	0	-1	0	Acsm1	acyl-CoA synthetase medium-chain family member 1
Acsm2	acyl-CoA synthetase medium-chain family member 2	7	119561493	119596601	0	0	0	0	0	0	0	0	-1	0	0	0	0	-1	0	0	Acsm2	acyl-CoA synthetase medium-chain family member 2
Acsm3	acyl-CoA synthetase medium-chain family member 3	7	119760923	119787513	0	0	0	0	0	0	0	0	0	0	0	0	0	0	-1	0	Acsm3	acyl-CoA synthetase medium-chain family member 3
Acsm4	acyl-CoA synthetase medium-chain family member 4	7	119690026	119714567	0	0	0	0	0	0	0	0	0	0	0	0	0	0	0	0	BC048390	cDNA sequence BC048390
Acss1	acyl-CoA synthetase short-chain family member 1	2	150618105	150668500	0	0	0	0	0	0	0	0	0	1	0	0	0	0	0	0	Acss1	acyl-CoA synthetase short-chain family member 1
Acss2	acyl-CoA synthetase short-chain family member 2	2	155517948	155585724	0	0	0	0	0	0	0	0	0	2.295	0	0	1	0	0	0	Acss2	acyl-CoA synthetase short-chain family member 2
Acss3	acyl-CoA synthetase short-chain family member 3	10	106965082	107123668	0	0	0	0	0	0	0	0	0	0	-1	0	0	0	0	0	8430416H19Rik	RIKEN cDNA 8430416H19 gene
Acta1	actin, alpha 1, skeletal muscle	8	123891767	123894736	0	0	0	0	0	0	0	0	0	0	0	0	0	0	0	0	Acta1	actin, alpha 1, skeletal muscle
Acta2	actin, alpha 2, smooth muscle, aorta	19	34241090	34255336	0	0	0	0	0	0	0	0	0	0	0	0	0	0	0	0	Acta2	actin, alpha 2, smooth muscle, aorta
Actb	actin, beta	5	142903115	142906754	1	0	0	0	0	0	0	0	0	1	2.903	0	0	0	0	0	Actb	actin, beta, cytoplasmic
Actbl2	actin, beta-like 2	13	111255013	111257749	0	0	0	0	0	0	0	0	0	0	0	0	0	0	0	0	4732495G21Rik	RIKEN cDNA 4732495G21 gene
Actc1	actin, alpha, cardiac muscle 1	2	114047282	114053548	0	0	0	0	0	0	0	0	0	0	0	0	0	0	0	0	Actc1	actin, alpha, cardiac
Actg2	actin, gamma 2, smooth muscle, enteric	6	83512905	83536265	0	2.284	1	1	1	0	0	0	0	0	0	0	0	0	0	0	Actg2	actin, gamma 2, smooth muscle, enteric
Actl11	actin-like 11	9	107928469	107932461	0	0	0	0	0	0	0	0	0	0	0	0	0	0	0	0	4921517D21Rik	RIKEN cDNA 4921517D21 gene
Actl6a	actin-like 6A	3	32706298	32726973	0	0	0	0	0	0	0	0	0	0	0	0	0	0	0	0	Actl6a	actin-like 6A
Actl6b	actin-like 6B	5	137553517	137569582	0	0	0	0	0	0	0	0	0	0	1	0	0	0	0	0	Actl6b	actin-like 6B
Actl7a	actin-like 7a	4	56743413	56744925	0	0	0	0	0	0	0	0	0	0	0	0	0	0	0	0	Actl7a	actin-like 7a
Actl7b	actin-like 7b	4	56740005	56741443	0	0	0	0	0	0	0	0	0	0	0	0	0	0	0	0	Actl7b	actin-like 7b
Actl9	actin-like 9	17	33432896	33434268	0	0	0	0	0	0	0	0	0	0	0	0	0	0	0	0	1700029I08Rik	RIKEN cDNA 1700029I08 gene
Actn1	actinin, alpha 1	12	80167542	80260371	0	0	0	0	0	0	1	0	0	0	0	1	0	0	0	0	Actn1	actinin, alpha 1
Actn2	actinin alpha 2	13	12269426	12340760	0	0	0	0	0	0	0	0	0	0	0	0	0	0	0	0	Actn2	actinin alpha 2
Actn3	actinin alpha 3	19	4861223	4877909	0	0	0	0	0	0	0	2.094	0	0	0	0	0	1	0	0	Actn3	actinin alpha 3
Actn4	actinin alpha 4	7	28893248	28962340	0	0	0	0	0	0	0	0	0	0	0	0	0	0	0	0	Actn4	actinin alpha 4
Actr10	ARP10 actin-related protein 10	12	70937857	70964718	0	0	0	0	0	0	0	0	1	0	0	0	0	0	0	0	Actr10	ARP10 actin-related protein 10 homolog (S. cerevisiae)
Actr1a	ARP1 actin-related protein 1A, centractin alpha	19	46376814	46395735	0	0	0	0	0	1	1	2.718	0	1	0	1	0	1	1	1	Actr1a	ARP1 actin-related protein 1 homolog A (yeast)
Actr1b	ARP1 actin-related protein 1B, centractin beta	1	36698114	36714422	0	0	0	0	0	0	0	0	0	0	1	0	0	0	0	0	Actr1b	ARP1 actin-related protein 1 homolog B (yeast)
Actr2	ARP2 actin-related protein 2	11	20062304	20112913	0	0	0	0	0	0	0	0	1	1	0	0	0	0	0	0	Actr2	ARP2 actin-related protein 2 homolog (yeast)
Actr3	ARP3 actin-related protein 3	1	125392906	125435727	0	0	0	0	0	0	0	0	0	0	0	0	0	0	0	0	Actr3	ARP3 actin-related protein 3 homolog (yeast)
Actr3b	ARP3 actin-related protein 3B	5	25759997	25850688	0	0	0	0	0	0	0	0	0	0	0	0	0	0	0	0	Actr3b	ARP3 actin-related protein 3 homolog B (yeast)
Actr5	ARP5 actin-related protein 5	2	158624888	158639211	1.994	2.384	0	0	0	0	0	0	0	3.687	0	0	2.88	0	0	0	Actr5	ARP5 actin-related protein 5 homolog (yeast)
Actr6	ARP6 actin-related protein 6	10	89711973	89732295	0	0	0	0	0	0	0	0	0	0	0	0	0	0	0	0	Actr6	ARP6 actin-related protein 6 homolog (yeast)
Actr8	ARP8 actin-related protein 8	14	29978337	29993221	0	0	0	0	0	0	0	0	0	0	0	0	1	0	0	0	Actr8	ARP8 actin-related protein 8 homolog (S. cerevisiae)
Actrt2	actin-related protein T2	4	154666433	154667867	0	0	0	0	0	0	0	0	0	0	0	0	0	0	0	0	Actrt2	actin-related protein T2
Actrt3	actin related protein T3	3	30597073	30599939	0	0	0	0	0	-1	0	0	0	0	0	0	0	0	0	0	Arpm1	actin related protein M1
Acvr1	activin A receptor, type 1	2	58388644	58567157	0	0	0	0	0	0	0	0	0	0	0	0	0	0	0	0	Acvr1	activin A receptor, type 1
Acvr1b	activin A receptor, type 1B	15	101174067	101213679	0	0	0	0	0	1	0	0	0	0	0	0	1	0	0	0	Acvr1b	activin A receptor, type 1B
Acvr1c	activin A receptor, type IC	2	58267453	58357895	0	0	0	0	0	0	0	0	0	0	0	0	0	0	0	0	Acvr1c	activin A receptor, type IC
Acvr2a	activin receptor IIA	2	48814109	48903269	0	0	0	0	0	0	0	0	0	0	0	0	0	0	0	0	Acvr2a	activin receptor IIA
Acvr2b	activin receptor IIB	9	119402444	119433501	0	0	0	0	0	0	0	0	0	0	0	0	0	0	0	0	Acvr2b	activin receptor IIB
Acvrl1	activin A receptor, type II-like 1	15	101128522	101145336	0	0	0	0	0	1	0	1	0	0	0	0	1	0	0	0	Acvrl1	activin A receptor, type II-like 1
Acy1	aminoacylase 1	9	106432981	106438319	0	0	0	0	0	0	0	0	1	0	0	0	0	0	0	0	Acy1	aminoacylase 1
Acy3	aspartoacylase (aminoacylase) 3	19	3986661	3990007	0	0	0	0	0	0	0	0	0	0	0	0	0	0	0	0	Acy3	aspartoacylase (aminoacylase) 3
Acyp1	acylphosphatase 1, erythrocyte (common) type	12	85272398	85288438	0	0	0	1	0	0	1	0	0	0	1	1	0	0	0	0	Acyp1	acylphosphatase 1, erythrocyte (common) type
Acyp2	acylphosphatase 2, muscle type	11	30505991	30649587	0	0	0	0	0	0	0	0	0	0	0	0	0	0	0	0	Acyp2	acylphosphatase 2, muscle type
Ada	adenosine deaminase	2	163726584	163750239	0	0	0	0	0	0	0	0	0	0	0	0	1	0	0	0	Ada	adenosine deaminase
Adad1	adenosine deaminase domain containing 1 (testis specific)	3	37063527	37121930	0	0	0	0	0	0	0	0	0	0	0	0	0	0	0	0	Tenr	testis nuclear RNA binding protein
Adal	adenosine deaminase-like	2	121140428	121156680	0	1	0	0	0	0	0	0	1	0	0	0	0	0	0	0	Adal	adenosine deaminase-like
Adam10	a disintegrin and metallopeptidase domain 10	9	70678997	70780229	0	0	0	0	0	0	0	0	0	0	0	0	0	0	0	0	Adam10	a disintegrin and metallopeptidase domain 10
Adam11	a disintegrin and metallopeptidase domain 11	11	102761439	102780262	0	0	0	0	0	0	0	0	0	0	0	0	0	0	0	0	Adam11	a disintegrin and metallopeptidase domain 11
Adam12	a disintegrin and metallopeptidase domain 12 (meltrin alpha)	7	133883199	134232146	0	0	0	0	0	0	0	0	0	0	0	0	0	0	0	0	Adam12	a disintegrin and metallopeptidase domain 12 (meltrin alpha)
Adam15	a disintegrin and metallopeptidase domain 15 (metargidin)	3	89338542	89349996	0	0	0	0	0	0	0	0	0	0	0	0	0	0	0	0	Adam15	a disintegrin and metallopeptidase domain 15 (metargidin)
Adam17	a disintegrin and metallopeptidase domain 17	12	21323509	21373632	0	0	0	0	0	0	0	0	0	0	0	0	0	0	0	0	Adam17	a disintegrin and metallopeptidase domain 17
Adam18	a disintegrin and metallopeptidase domain 18	8	24602246	24674755	0	0	0	0	0	0	0	0	0	0	0	0	0	0	0	0	Adam18	a disintegrin and metallopeptidase domain 18
Adam19	a disintegrin and metallopeptidase domain 19 (meltrin beta)	11	46055992	46147343	0	0	0	0	0	0	0	0	0	0	0	0	0	0	0	0	Adam19	a disintegrin and metallopeptidase domain 19 (meltrin beta)
Adam1a	a disintegrin and metallopeptidase domain 1a	5	121518576	121522071	0	0	0	0	0	0	0	0	0	1	0	0	-1	0	0	0	Adam1a	a disintegrin and metallopeptidase domain 1a
Adam1b	a disintegrin and metallopeptidase domain 1b	5	121500098	121503435	0	0	0	0	0	0	0	0	0	0	0	0	-1	0	0	0	Adam1b	a disintegrin and metallopeptidase domain 1b
Adam2	a disintegrin and metallopeptidase domain 2	14	66027329	66077733	0	0	0	0	0	0	0	0	0	0	-1	0	0	0	0	0	Adam2	a disintegrin and metallopeptidase domain 2
Adam21	a disintegrin and metallopeptidase domain 21	12	81558584	81568474	0	0	0	0	0	0	0	0	0	0	0	1	0	0	0	0	Adam21	a disintegrin and metallopeptidase domain 21
Adam22	a disintegrin and metallopeptidase domain 22	5	8072352	8368160	1	0	0	0	0	0	0	0	0	0	0	0	0	0	0	0	Adam22	a disintegrin and metallopeptidase domain 22
Adam23	a disintegrin and metallopeptidase domain 23	1	63445891	63596276	0	0	0	0	0	0	0	0	0	0	0	0	0	0	0	0	Adam23	a disintegrin and metallopeptidase domain 23
Adam24	a disintegrin and metallopeptidase domain 24 (testase 1)	8	40675094	40682199	0	0	0	0	0	0	0	0	0	1	0	0	0	1	0	1	Adam24	a disintegrin and metallopeptidase domain 24 (testase 1)
Adam25	a disintegrin and metallopeptidase domain 25 (testase 2)	8	40752208	40756175	0	0	0	0	0	0	0	0	0	1	0	0	0	1	2.053	1	Adam25	a disintegrin and metallopeptidase domain 25 (testase 2)
Adam26a	a disintegrin and metallopeptidase domain 26A (testase 3)	8	43568278	43576707	0	0	0	0	0	0	0	-1	0	0	0	-1	0	0	0	0	Adam26a	a disintegrin and metallopeptidase domain 26A (testase 3)
Adam28	a disintegrin and metallopeptidase domain 28	14	68606027	68655842	0	0	0	0	0	0	0	0	0	0	-1	0	0	0	0	0	Adam28	a disintegrin and metallopeptidase domain 28
Adam29	a disintegrin and metallopeptidase domain 29	8	55870912	55906948	0	0	0	0	0	0	0	0	0	0	0	0	0	0	0	0	Adam29	a disintegrin and metallopeptidase domain 29
Adam3	a disintegrin and metallopeptidase domain 3 (cyritestin)	8	24677225	24725852	0	0	0	0	0	0	0	0	0	0	0	0	0	0	0	0	Adam3	a disintegrin and metallopeptidase domain 3 (cyritestin)
Adam30	a disintegrin and metallopeptidase domain 30	3	98160630	98164169	0	0	0	0	0	0	0	0	0	0	0	0	0	0	0	0	Adam30	a disintegrin and metallopeptidase domain 30
Adam32	a disintegrin and metallopeptidase domain 32	8	24836140	24948804	0	0	0	0	0	0	0	0	0	0	0	0	0	0	0	0	Adam32	a disintegrin and metallopeptidase domain 32
Adam33	a disintegrin and metallopeptidase domain 33	2	131050591	131063814	0	0	0	0	0	0	0	0	0	0	0	0	0	0	0	0	Adam33	a disintegrin and metallopeptidase domain 33
Adam34	a disintegrin and metallopeptidase domain 34	8	43650435	43699487	0	0	0	0	0	0	0	0	0	0	0	0	0	0	0	0	Adam34	a disintegrin and metallopeptidase domain 34
Adam4	a disintegrin and metallopeptidase domain 4	12	81419443	81421946	0	0	0	0	0	0	0	0	0	0	0	0	0	0	0	0	Adam4	a disintegrin and metallopeptidase domain 4
Adam5	a disintegrin and metallopeptidase domain 5	8	24727093	24824369	0	0	0	0	0	0	0	0	0	0	0	0	0	0	0	0	Adam5	a disintegrin and metallopeptidase domain 5
Adam7	a disintegrin and metallopeptidase domain 7	14	68497336	68533689	0	0	0	0	0	0	0	0	0	-1	-1	0	0	0	0	0	Adam7	a disintegrin and metallopeptidase domain 7
Adam8	a disintegrin and metallopeptidase domain 8	7	139978932	139992562	0	0	0	0	0	0	0	0	0	0	0	0	0	0	0	0	Adam8	a disintegrin and metallopeptidase domain 8
Adam9	a disintegrin and metallopeptidase domain 9 (meltrin gamma)	8	24949611	25016922	0	0	0	0	0	0	0	0	0	0	0	0	0	0	0	0	Adam9	a disintegrin and metallopeptidase domain 9 (meltrin gamma)
Adamdec1	ADAM-like, decysin 1	14	68563387	68582072	0	0	0	0	0	0	0	0	0	0	0	0	0	0	0	0	Adamdec1	ADAM-like, decysin 1
Adamts1	a disintegrin-like and metallopeptidase (reprolysin type) with thrombospondin type 1 motif, 1	16	85793827	85803113	0	0	0	0	0	0	0	0	0	0	0	0	1	1	0	0	Adamts1	a disintegrin-like and metallopeptidase (reprolysin type) with thrombospondin type 1 motif, 1
Adamts10	a disintegrin-like and metallopeptidase (reprolysin type) with thrombospondin type 1 motif, 10	17	33524204	33553782	0	0	0	0	0	0	0	0	0	0	0	1	0	0	0	0	Adamts10	a disintegrin-like and metallopeptidase (reprolysin type) with thrombospondin type 1 motif, 10
Adamts12	a disintegrin-like and metallopeptidase (reprolysin type) with thrombospondin type 1 motif, 12	15	11064790	11346867	0	0	0	0	0	0	0	0	0	0	0	0	3.092	0	0	0	Adamts12	a disintegrin-like and metallopeptidase (reprolysin type) with thrombospondin type 1 motif, 12
Adamts13	a disintegrin-like and metallopeptidase (reprolysin type) with thrombospondin type 1 motif, 13	2	26973416	27009628	0	0	0	0	0	0	0	0	0	0	0	0	0	0	0	0	Adamts13	a disintegrin-like and metallopeptidase (reprolysin type) with thrombospondin type 1 motif, 13
Adamts15	a disintegrin-like and metallopeptidase (reprolysin type) with thrombospondin type 1 motif, 15	9	30899155	30922452	0	0	0	0	0	0	0	0	0	1	0	0	0	0	0	0	Adamts15	a disintegrin-like and metallopeptidase (reprolysin type) with thrombospondin type 1 motif, 15
Adamts16	a disintegrin-like and metallopeptidase (reprolysin type) with thrombospondin type 1 motif, 16	13	70727802	70841811	0	0	0	0	0	0	0	0	0	0	0	0	0	0	0	0	Adamts16	a disintegrin-like and metallopetidase (reprolysin type) with thrombospondin type 1 motif, 16
Adamts17	a disintegrin-like and metallopeptidase (reprolysin type) with thrombospondin type 1 motif, 17	7	66839735	67152625	0	0	0	0	0	0	0	0	0	0	0	0	0	0	0	0	Adamts17	ADAM metallopeptidase with thrombospondin type 1 motif, 17
Adamts18	a disintegrin-like and metallopeptidase (reprolysin type) with thrombospondin type 1 motif, 18	8	113697126	113848615	0	0	0	0	0	0	0	0	0	0	0	0	0	0	0	0	Adamts18	a disintegrin-like and metallopeptidase (reprolysin type) with thrombospondin type 1 motif, 18
Adamts19	a disintegrin-like and metallopeptidase (reprolysin type) with thrombospondin type 1 motif, 19	18	58836764	59053678	0	0	0	0	0	0	0	0	0	0	0	0	0	0	0	0	Adamts19	a disintegrin-like and metallopeptidase (reprolysin type) with thrombospondin type 1 motif, 19
Adamts2	a disintegrin-like and metallopeptidase (reprolysin type) with thrombospondin type 1 motif, 2	11	50602084	50807573	0	0	0	0	0	0	0	0	0	0	0	0	0	0	0	0	Adamts2	a disintegrin-like and metallopeptidase (reprolysin type) with thrombospondin type 1 motif, 2
Adamts20	a disintegrin-like and metallopeptidase (reprolysin type) with thrombospondin type 1 motif, 20	15	94270163	94465418	0	0	0	0	0	0	0	0	0	0	0	0	0	0	0	0	Adamts20	a disintegrin-like and metallopeptidase (reprolysin type) with thrombospondin type 1 motif, 20
Adamts4	a disintegrin-like and metallopeptidase (reprolysin type) with thrombospondin type 1 motif, 4	1	171250421	171260637	0	0	0	0	0	0	0	0	1	0	0	0	0	0	0	0	Adamts4	a disintegrin-like and metallopeptidase (reprolysin type) with thrombospondin type 1 motif, 4
Adamts5	a disintegrin-like and metallopeptidase (reprolysin type) with thrombospondin type 1 motif, 5 (aggrecanase-2)	16	85858170	85901125	0	0	0	0	0	0	0	0	0	0	0	0	1	1	0	0	Adamts5	a disintegrin-like and metallopeptidase (reprolysin type) with thrombospondin type 1 motif, 5 (aggrecanase-2)
Adamts7	a disintegrin-like and metallopeptidase (reprolysin type) with thrombospondin type 1 motif, 7	9	90163069	90208071	0	0	0	0	0	0	0	0	0	0	0	0	0	0	0	0	Adamts7	a disintegrin-like and metallopeptidase (reprolysin type) with thrombospondin type 1 motif, 7
Adamts8	a disintegrin-like and metallopeptidase (reprolysin type) with thrombospondin type 1 motif, 8	9	30942562	30963838	0	0	0	0	0	0	0	0	0	0	0	0	0	0	0	0	Adamts8	a disintegrin-like and metallopeptidase (reprolysin type) with thrombospondin type 1 motif, 8
Adamtsl1	ADAMTS-like 1	4	86053915	86428385	0	0	0	0	0	0	0	0	0	0	0	0	0	0	0	0	5930437A14Rik	RIKEN cDNA 5930437A14 gene
Adamtsl2	ADAMTS-like 2	2	27079379	27108981	0	0	0	0	0	0	0	0	0	0	0	0	0	0	0	0	Adamtsl2	ADAMTS-like 2
Adamtsl4	ADAMTS-like 4	3	95676201	95687917	0	0	0	0	0	0	0	0	0	0	0	0	0	0	0	0	Adamtsl4	ADAMTS-like 4
Adamtsl5	ADAMTS-like 5	10	80339110	80348412	0	0	0	0	0	0	0	0	0	0	0	0	0	0	0	0	Adamtsl5	ADAMTS-like 5
Adap1	ArfGAP with dual PH domains 1	5	139271876	139325622	0	0	0	0	0	0	0	0	0	1	1	0	0	0	0	0	Centa1	centaurin, alpha 1
Adap2	ArfGAP with dual PH domains 2	11	80154105	80178958	0	0	0	0	0	0	0	0	0	0	0	0	0	0	0	0	Centa2	centaurin, alpha 2
Adar	adenosine deaminase, RNA-specific	3	89715022	89753446	0	0	0	0	0	0	0	0	0	0	0	0	0	0	0	0	Adar	adenosine deaminase, RNA-specific
Adarb1	adenosine deaminase, RNA-specific, B1	10	77290726	77418270	0	0	0	0	0	0	0	0	0	0	0	0	0	0	0	0	Adarb1	adenosine deaminase, RNA-specific, B1
Adarb2	adenosine deaminase, RNA-specific, B2	13	8202866	8768747	0	0	0	0	0	0	0	0	0	0	0	0	0	0	0	0	Adarb2	adenosine deaminase, RNA-specific, B2
Adat1	adenosine deaminase, tRNA-specific 1	8	111966908	111992302	0	0	0	0	0	1	0	0	0	2.202	0	0	0	1	2.45	1	Adat1	adenosine deaminase, tRNA-specific 1
Adat2	adenosine deaminase, tRNA-specific 2	10	13552894	13563376	0	0	0	0	0	0	0	0	0	0	0	0	0	0	0	0	Deadc1	deaminase domain containing 1
Adck1	aarF domain containing kinase 1	12	88360554	88461719	0	0	0	0	0	0	0	0	0	0	0	0	0	0	0	0	Adck1	aarF domain containing kinase 1
Adck2	aarF domain containing kinase 2	6	39573873	39588769	0	0	1	0	0	0	0	0	1	0	0	0	0	0	0	0	Adck2	aarF domain containing kinase 2
Adck3	aarF domain containing kinase 3	1	180165238	180199602	0	0	0	0	0	0	0	0	0	0	0	0	0	0	0	0	Cabc1	chaperone, ABC1 activity of bc1 complex like (S. pombe)
Adck4	aarF domain containing kinase 4	7	27233023	27262252	0	0	0	0	0	0	0	0	0	0	0	0	0	0	0	0	Adck4	aarF domain containing kinase 4
Adck5	aarF domain containing kinase 5	15	76576358	76595816	0	0	0	1	1	0	0	1	0	0	0	0	1	0	1	0	Adck5	aarF domain containing kinase 5
Adcy1	adenylate cyclase 1	11	7063489	7178506	0	0	0	0	0	0	0	0	0	0	0	0	0	0	0	0	Adcy1	adenylate cyclase 1
Adcy10	adenylate cyclase 10	1	165485183	165576774	0	0	0	0	0	0	0	0	0	0	0	0	0	0	0	0	Sacy	soluble adenylyl cyclase
Adcy2	adenylate cyclase 2	13	68620043	68999541	0	0	0	0	0	0	0	0	0	0	0	0	0	0	0	0	Adcy2	adenylate cyclase 2
Adcy3	adenylate cyclase 3	12	4133103	4213525	0	0	0	0	0	0	0	0	0	0	1	0	0	0	0	0	Adcy3	adenylate cyclase 3
Adcy4	adenylate cyclase 4	14	55769058	55784042	0	0	0	0	0	0	0	0	0	0	0	0	0	0	0	0	Adcy4	adenylate cyclase 4
Adcy5	adenylate cyclase 5	16	35155636	35304549	0	0	0	0	0	0	0	0	0	0	0	0	1	0	0	0	Adcy5	adenylate cyclase 5
Adcy6	adenylate cyclase 6	15	98589994	98607633	1	1	0	0	0	0	0	2.126	0	0	0	1	1	1	2.267	0	Adcy6	adenylate cyclase 6
Adcy7	adenylate cyclase 7	8	88272403	88329962	0	0	0	0	0	0	0	0	0	0	0	0	0	0	0	0	Adcy7	adenylate cyclase 7
Adcy8	adenylate cyclase 8	15	64699042	64922296	0	0	0	0	0	0	0	0	0	0	0	0	0	0	0	2.658	Adcy8	adenylate cyclase 8
Adcy9	adenylate cyclase 9	16	4287529	4420498	0	0	0	0	0	0	0	0	0	0	0	0	1	0	0	0	Adcy9	adenylate cyclase 9
Adcyap1	adenylate cyclase activating polypeptide 1	17	93199422	93205485	0	0	0	0	0	0	0	0	0	0	0	0	0	0	0	0	Adcyap1	adenylate cyclase activating polypeptide 1
Adcyap1r1	adenylate cyclase activating polypeptide 1 receptor 1	6	55451978	55501451	0	0	1	1	1	0	0	0	1	0	0	0	0	0	0	0	Adcyap1r1	adenylate cyclase activating polypeptide 1 receptor 1
Add1	adducin 1 (alpha)	5	34573664	34632308	0	0	0	0	0	0	0	0	0	0	0	0	0	0	0	0	Add1	adducin 1 (alpha)
Add2	adducin 2 (beta)	6	86078084	86119555	0	0	1	1	1	0	0	0	0	0	0	0	0	0	0	0	Add2	adducin 2 (beta)
Add3	adducin 3 (gamma)	19	53140443	53247326	0	0	0	0	0	0	0	1	0	0	0	0	0	0	0	0	Add3	adducin 3 (gamma)
Adgb	androglobin	10	10335709	10472326	0	0	0	0	0	0	0	0	0	0	0	0	0	0	0	0	9130014G24Rik	RIKEN cDNA 9130014G24 gene
Adgra2	adhesion G protein-coupled receptor A2	8	27085583	27123436	0	0	0	0	0	0	0	0	0	0	0	0	0	0	0	0	Gpr124	G protein-coupled receptor 124
Adgrb1	adhesion G protein-coupled receptor B1	15	74516195	74589465	0	0	0	0	0	0	0	0	0	0	0	0	0	0	0	0	Bai1	brain-specific angiogenesis inhibitor 1
Adgrb2	adhesion G protein-coupled receptor B2	4	129984870	130022633	0	0	0	0	0	0	0	0	0	0	0	0	0	0	0	0	Bai2	brain-specific angiogenesis inhibitor 2
Adgrb3	adhesion G protein-coupled receptor B3	1	25067476	25829707	0	0	0	0	0	0	0	0	0	0	0	0	0	0	0	0	Bai3	brain-specific angiogenesis inhibitor 3
Adgre1	adhesion G protein-coupled receptor E1	17	57358686	57483529	0	0	0	0	0	0	0	0	0	0	0	0	0	0	0	0	Emr1	EGF-like module containing, mucin-like, hormone receptor-like sequence 1
Adgre4	adhesion G protein-coupled receptor E4	17	55749984	55853662	0	0	0	1	0	0	0	0	0	0	0	0	0	0	0	0	Emr4	EGF-like module containing, mucin-like, hormone receptor-like sequence 4
Adgre5	adhesion G protein-coupled receptor E5	8	83723251	83741326	1	3.239	0	0	1	1	0	2.101	0	2.765	0	0	0	2.32	2.852	1	Cd97	CD97 antigen
Adgrf1	adhesion G protein-coupled receptor F1	17	43270329	43324737	0	0	0	0	0	0	0	0	0	0	0	0	0	0	0	0	Gpr110	G protein-coupled receptor 110
Adgrf2	adhesion G protein-coupled receptor F2	17	42708936	42742179	0	0	0	0	0	0	0	0	0	0	0	0	0	0	0	0	Gpr111	G protein-coupled receptor 111
Adgrf3	adhesion G protein-coupled receptor F3	5	30193431	30205722	0	0	0	0	0	0	0	0	0	0	0	0	0	0	0	0	Gpr113	G protein-coupled receptor 113
Adgrg1	adhesion G protein-coupled receptor G1	8	94977109	95014208	0	0	0	0	0	0	0	0	0	0	0	0	0	0	0	0	Gpr56	G protein-coupled receptor 56
Adgrg3	adhesion G protein-coupled receptor G3	8	95017692	95045247	0	1	0	0	0	0	0	0	0	1	0	0	0	0	0	0	Gpr97	G protein-coupled receptor 97
Adgrg5	adhesion G protein-coupled receptor G5	8	94923694	94943280	0	3.244	0	0	0	0	0	1	0	1	0	0	0	1	1	1	Gpr114	G protein-coupled receptor 114
Adgrg6	adhesion G protein-coupled receptor G6	10	14402585	14545036	0	0	0	0	0	0	0	0	0	0	0	0	0	0	0	0	Gpr126	G protein-coupled receptor 126
Adgrg7	adhesion G protein-coupled receptor G7	16	56724609	56795855	0	0	0	0	0	0	0	0	0	0	1	0	1	0	0	0	Gpr128	G protein-coupled receptor 128
Adgrl1	adhesion G protein-coupled receptor L1	8	83900105	83941954	0	0	0	0	0	0	0	0	0	0	0	0	0	0	0	0	Lphn1	latrophilin 1
Adgrl3	adhesion G protein-coupled receptor L3	5	81020138	81825133	0	0	0	0	0	-1	0	0	0	0	0	0	0	0	0	0	Lphn3	latrophilin 3
Adgrl4	adhesion G protein-coupled receptor L4	3	151437887	151545086	0	0	0	0	0	-1	0	0	0	0	0	0	0	0	0	0	Eltd1	EGF, latrophilin seven transmembrane domain containing 1
Adgrv1	adhesion G protein-coupled receptor V1	13	81095068	81633154	0	0	0	0	0	0	0	0	0	0	0	0	0	0	0	0	Gpr98	G protein-coupled receptor 98
Adh1	alcohol dehydrogenase 1 (class I)	3	138260991	138290698	0	0	0	0	0	0	0	0	0	0	0	0	0	0	0	0	Adh1	alcohol dehydrogenase 1 (class I)
Adh4	alcohol dehydrogenase 4 (class II), pi polypeptide	3	138415466	138430892	0	0	0	0	0	0	0	0	0	0	0	0	0	0	0	0	Adh4	alcohol dehydrogenase 4 (class II), pi polypeptide
Adh5	alcohol dehydrogenase 5 (class III), chi polypeptide	3	138443093	138455499	0	-1	0	0	-1	0	0	0	0	0	0	0	0	0	0	0	Adh5	alcohol dehydrogenase 5 (class III), chi polypeptide
Adh7	alcohol dehydrogenase 7 (class IV), mu or sigma polypeptide	3	138217760	138233382	0	0	0	0	0	0	0	0	0	0	0	0	0	0	0	0	Adh7	alcohol dehydrogenase 7 (class IV), mu or sigma polypeptide
Adhfe1	alcohol dehydrogenase, iron containing, 1	1	9547948	9580673	0	0	0	0	0	0	0	0	0	0	0	0	0	0	0	0	Adhfe1	alcohol dehydrogenase, iron containing, 1
Adi1	acireductone dioxygenase 1	12	28675231	28682175	0	0	0	2.946	4.964	0	2.909	0	3.715	0	0	4.051	0	0	0	0	Adi1	acireductone dioxygenase 1
Adig	adipogenin	2	158502612	158508198	0	0	0	0	0	0	0	0	0	0	0	0	0	0	0	0	BC054059	cDNA sequence BC054059
Adipoq	adiponectin, C1Q and collagen domain containing	16	23146536	23158028	0	0	0	0	0	0	0	0	0	0	0	0	1	0	0	0	Adipoq	adiponectin, C1Q and collagen domain containing
Adipor1	adiponectin receptor 1	1	134415378	134433351	0	0	0	0	0	0	0	0	0	0	1	0	0	0	0	0	Adipor1	adiponectin receptor 1
Adipor2	adiponectin receptor 2	6	119353150	119417704	0	1	1	0	0	0	0	0	0	0	0	0	0	0	0	0	Adipor2	adiponectin receptor 2
Adk	adenosine kinase	14	21052574	21448568	0	0	0	0	0	0	0	0	0	0	0	0	1	0	0	0	Adk	adenosine kinase
Adm	adrenomedullin	7	110627661	110629820	0	0	0	0	0	0	0	0	0	0	0	0	0	0	-1	0	Adm	adrenomedullin
Adm2	adrenomedullin 2	15	89322972	89324728	2.07	2.559	0	1	1	0	1	2.865	1	1	0	2.814	1	1	3.444	0	Adm2	adrenomedullin 2
Adnp	activity-dependent neuroprotective protein	2	168180986	168207112	0	0	0	0	0	0	0	0	0	0	0	0	0	0	0	0	Adnp	activity-dependent neuroprotective protein
Ado	2-aminoethanethiol (cysteamine) dioxygenase	10	67544512	67548955	0	0	0	0	0	0	0	0	0	0	0	0	0	0	0	0	Gm237	gene model 237, (NCBI)
Adora1	adenosine A1 receptor	1	134199225	134235431	0	1	0	0	0	0	0	0	0	0	1	0	0	0	0	0	Adora1	adenosine A1 receptor
Adora2a	adenosine A2a receptor	10	75316943	75334788	0	0	0	0	0	0	1	0	0	0	0	0	0	0	0	0	Adora2a	adenosine A2a receptor
Adora2b	adenosine A2b receptor	11	62248984	62266453	0	2.635	0	0	1	0	0	1	0	0	0	1	0	0	0	1	Adora2b	adenosine A2b receptor
Adora3	adenosine A3 receptor	3	105870858	105908926	1	0	0	0	0	0	0	0	0	0	2.146	0	0	0	0	0	1700001D09Rik	RIKEN cDNA 1700001D09 gene
Adpgk	ADP-dependent glucokinase	9	59291572	59316199	0	0	0	0	0	0	0	0	0	0	0	0	0	0	0	0	Adpgk	ADP-dependent glucokinase
Adprh	ADP-ribosylarginine hydrolase	16	38445399	38452689	0	0	0	0	0	0	0	0	0	0	0	0	1	0	0	0	Adprh	ADP-ribosylarginine hydrolase
Adprhl1	ADP-ribosylhydrolase like 1	8	13235655	13254162	0	0	0	0	0	0	0	0	0	0	0	0	0	0	0	0	Adprhl1	ADP-ribosylhydrolase like 1
Adprhl2	ADP-ribosylhydrolase like 2	4	126316047	126321703	0	0	0	0	0	0	0	0	-1	0	0	0	0	0	0	0	Adprhl2	ADP-ribosylhydrolase like 2
Adprm	ADP-ribose/CDP-alcohol diphosphatase, manganese dependent	11	67037905	67052594	0	0	0	0	0	0	0	0	0	0	0	0	0	0	0	0	2310004I24Rik	RIKEN cDNA 2310004I24 gene
Adra1a	adrenergic receptor, alpha 1a	14	66635251	66733462	0	0	0	0	0	0	0	0	0	0	-1	0	0	0	0	0	Adra1a	adrenergic receptor, alpha 1a
Adra1b	adrenergic receptor, alpha 1b	11	43774606	43901210	0	0	0	0	0	0	0	0	0	0	0	0	0	0	0	0	Adra1b	adrenergic receptor, alpha 1b
Adra1d	adrenergic receptor, alpha 1d	2	131545850	131562283	0	0	0	0	0	0	0	0	0	0	0	0	0	0	0	0	Adra1d	adrenergic receptor, alpha 1d
Adra2a	adrenergic receptor, alpha 2a	19	54045182	54048982	0	0	0	0	0	0	0	0	0	0	0	0	0	0	0	0	Adra2a	adrenergic receptor, alpha 2a
Adra2b	adrenergic receptor, alpha 2b	2	127363208	127367221	0	0	0	0	0	0	0	0	0	0	0	0	0	0	0	0	Adra2b	adrenergic receptor, alpha 2b
Adra2c	adrenergic receptor, alpha 2c	5	35278319	35281763	0	0	0	0	0	0	0	0	0	0	0	0	0	0	0	0	Adra2c	adrenergic receptor, alpha 2c
Adrb2	adrenergic receptor, beta 2	18	62177817	62179959	0	0	0	0	0	0	0	0	0	0	0	0	0	0	0	0	Adrb2	adrenergic receptor, beta 2
Adrb3	adrenergic receptor, beta 3	8	27225776	27229588	0	0	0	0	0	0	0	0	0	0	0	0	0	0	0	0	Adrb3	adrenergic receptor, beta 3
Adrbk1	adrenergic receptor kinase, beta 1	19	4286001	4306222	0	0	0	0	0	0	0	1	0	0	0	0	0	1	1	0	Adrbk1	adrenergic receptor kinase, beta 1
Adrbk2	adrenergic receptor kinase, beta 2	5	112910482	113015791	0	0	0	0	0	0	0	0	0	0	0	0	0	0	0	0	Adrbk2	adrenergic receptor kinase, beta 2
Adrm1	adhesion regulating molecule 1	2	180171485	180176286	0	0	0	0	0	0	0	0	1	1	0	0	0	0	0	0	Adrm1	adhesion regulating molecule 1
Adsl	adenylosuccinate lyase	15	80948490	80970947	0	0	0	0	0	-1	0	0	0	0	0	0	0	0	0	0	Adsl	adenylosuccinate lyase 1
Adss	adenylosuccinate synthetase, non muscle	1	177762962	177796511	0	0	0	0	0	0	0	0	0	0	0	0	0	0	0	0	Adss	adenylosuccinate synthetase, non muscle
Adssl1	adenylosuccinate synthetase like 1	12	112620047	112641355	0	0	0	0	0	0	0	0	0	0	0	0	0	0	0	0	Adssl1	adenylosuccinate synthetase like 1
Adtrp	androgen dependent TFPI regulating protein	13	41763148	41847684	0	0	0	0	0	0	0	0	0	0	0	0	0	0	0	0	9530008L14Rik	RIKEN cDNA 9530008L14 gene
Aebp1	AE binding protein 1	11	5861947	5872088	0	0	0	0	0	0	0	0	0	0	0	0	0	0	0	0	Aebp1	AE binding protein 1
Aebp2	AE binding protein 2	6	140622449	140678472	0	0	1	0	1	0	0	0	0	0	0	0	0	0	0	0	Aebp2	AE binding protein 2
Aen	apoptosis enhancing nuclease	7	78895854	78911209	0	0	0	0	0	0	0	0	0	0	0	0	0	0	0	0	Isg20l1	interferon stimulated exonuclease gene 20-like 1
Aes	amino-terminal enhancer of split	10	81559494	81566362	0	0	0	0	0	0	0	0	0	0	0	0	0	0	0	0	Aes	amino-terminal enhancer of split
AF067063	cDNA sequence AF067063	13	119827961	119830216	0	0	0	0	0	0	0	0	0	0	0	0	0	0	0	0	AF067063	cDNA sequence AF067063
AF251705	cDNA sequence AF251705	11	114996721	115001880	0	0	0	0	0	0	0	0	0	0	0	0	0	0	0	0	Cd300d	Cd300D antigen
AF529169	cDNA sequence AF529169	9	89587216	89623125	0	0	0	0	0	0	0	0	0	0	0	0	0	0	0	0	AF529169	cDNA sequence AF529169
Afap1	actin filament associated protein 1	5	35893319	36003923	1	0	0	0	0	0	0	0	0	0	0	0	0	0	0	0	2600003E23Rik	RIKEN cDNA 2600003E23 gene
Afap1l1	actin filament associated protein 1-like 1	18	61730261	61786702	0	0	0	0	0	0	0	0	0	0	0	0	0	0	0	0	AI173486	expressed sequence AI173486
Afap1l2	actin filament associated protein 1-like 2	19	56912361	57008228	0	0	0	0	0	0	0	1	0	-1	0	0	0	0	0	0	AU041783	expressed sequence AU041783
Aff1	AF4/FMR2 family, member 1	5	103692374	103855322	0	0	0	0	0	0	0	0	0	0	0	0	0	0	0	0	Aff1	AF4/FMR2 family, member 1
Aff3	AF4/FMR2 family, member 3	1	38177326	38664955	0	0	0	0	0	0	0	0	0	0	0	0	0	0	0	0	Aff3	AF4/FMR2 family, member 3
Aff4	AF4/FMR2 family, member 4	11	53350833	53421830	0	0	0	0	0	0	0	0	0	0	0	0	0	0	0	0	Aff4	AF4/FMR2 family, member 4
Afg3l1	AFG3-like AAA ATPase 1	8	123477903	123503916	0	0	0	0	0	1	0	0	1	1.985	0	0	1	1	1	1	Afg3l1	AFG3(ATPase family gene 3)-like 1 (yeast)
Afg3l2	AFG3-like AAA ATPase 2	18	67404760	67449136	0	0	0	0	0	0	0	0	0	0	0	0	0	0	0	0	Afg3l2	AFG3(ATPase family gene 3)-like 2 (yeast)
Afm	afamin	5	90518932	90553543	0	0	0	0	0	0	0	0	0	0	0	0	0	0	0	0	Afm	afamin
Afmid	arylformamidase	11	117825924	117839908	0	0	0	0	0	0	0	0	0	0	0	0	0	0	0	0	Afmid	arylformamidase
Afp	alpha fetoprotein	5	90490737	90508907	0	0	0	0	0	0	0	0	0	0	1	0	0	0	0	0	Afp	alpha fetoprotein
Aftph	aftiphilin	11	20685084	20741589	0	0	0	0	0	0	0	0	0	0	0	0	0	0	0	0	Aftph	aftiphilin
Aga	aspartylglucosaminidase	8	53511702	53523421	0	0	0	0	0	0	0	0	0	0	0	0	0	0	0	1	Aga	aspartylglucosaminidase
Agap1	ArfGAP with GTPase domain, ankyrin repeat and PH domain 1	1	89454806	89897617	0	0	0	0	0	0	0	0	0	0	0	0	0	0	0	0	Centg2	centaurin, gamma 2
Agap2	ArfGAP with GTPase domain, ankyrin repeat and PH domain 2	10	127078907	127093169	0	0	0	0	0	0	0	0	0	0	0	0	0	0	0	0	Centg1	centaurin, gamma 1
Agap3	ArfGAP with GTPase domain, ankyrin repeat and PH domain 3	5	24452177	24502047	0	0	0	-1	0	0	0	0	0	0	-1	0	0	0	0	0	Centg3	centaurin, gamma 3
Agbl1	ATP/GTP binding protein-like 1	7	76318072	76766608	0	0	0	0	0	0	0	0	0	0	0	0	0	0	0	0	EG244071	predicted gene, EG244071
Agbl2	ATP/GTP binding protein-like 2	2	90782727	90834437	0	0	0	0	0	0	0	0	0	0	0	0	0	0	0	0	Agbl2	ATP/GTP binding protein-like 2
Agbl3	ATP/GTP binding protein-like 3	6	34780432	34859459	0	0	1	1	1	0	0	0	0	0	0	0	0	0	0	0	Agbl3	ATP/GTP binding protein-like 3
Agbl4	ATP/GTP binding protein-like 4	4	110397661	111664324	0	0	0	0	0	0	0	0	0	0	0	0	0	0	0	0	4931433A01Rik	RIKEN cDNA 4931433A01 gene
Agbl5	ATP/GTP binding protein-like 5	5	30888694	30906965	0	0	0	0	0	0	0	0	0	0	0	0	0	0	0	0	9430057O19Rik	RIKEN cDNA 9430057O19 gene
Ager	advanced glycosylation end product-specific receptor	17	34597862	34600936	1	1	0	0	0	0	0	1	0	0	0	1	0	0	2.352	0	Ager	advanced glycosylation end product-specific receptor
Agfg1	ArfGAP with FG repeats 1	1	82839483	82901182	0	0	0	0	0	0	0	0	0	0	1	0	0	0	0	0	Hrb	HIV-1 Rev binding protein
Agfg2	ArfGAP with FG repeats 2	5	137650463	137684726	0	0	0	0	0	0	0	0	0	0	1	0	0	0	0	0	Hrbl	HIV-1 Rev binding protein-like
[truncated: 14,843 more rows]

## Sheet: Exome-seq_copy_number
Sample	Gene	Chr	Start	End	Length	Log2ratio	Sig	BP_Whole	Amp_Del	Ab_Seg	Total_Seg	Ab_log2ratio	Log2r_Diff	Ab_Seg_Loc	Ab_Samples	Ab_Samples_Pcnt	Broad copy changes
[truncated: 22,125 more rows]

[truncated: 3 more sheets: DEGs_Tumour_Comparison, DEGs_Spleen_Comparison, DEGs_Lymph Node_Comparison]
